# Supplementary material for: Molecular characterization of the acquisition of longevity during seed maturation in soybean
Source: PubMed Central journal article supplement (PMC5507495; doi:10.1371/journal.pone.0180282), 2017-07-12
Supplement: pone.0180282.s002.pdf [file pone.0180282.s002.pdf]

**S1. Table. Description of the reproductive phenological stages of soybean seeds according to Ritchie et al. 1982 and those added in this work.**

| Stages           | Phenological stages according to Ritchie et al. |                                                                                                                                       | New phonological stages added in this work |                                                                   |
|------------------|-------------------------------------------------|---------------------------------------------------------------------------------------------------------------------------------------|--------------------------------------------|-------------------------------------------------------------------|
|                  | Denomination                                    | Description                                                                                                                           | Denomination                               | Description                                                       |
| R <sub>5,1</sub> | Seed filling                                    | Seeds ~ 5mm long in the pod (perceptible to touch)                                                                                    |                                            |                                                                   |
| R <sub>5,2</sub> | Seed filling                                    | Seeds ~ 7mm long in the pod                                                                                                           |                                            |                                                                   |
| R <sub>5,3</sub> | Seed filling                                    | Seeds ~ 8mm long in the pod                                                                                                           |                                            |                                                                   |
| R <sub>5,4</sub> | Seed filling                                    | Seeds ~ 10mm long in the pod                                                                                                          |                                            |                                                                   |
| R <sub>5,5</sub> | Seed filling                                    | Seeds ~ 11mm long in the pod                                                                                                          |                                            |                                                                   |
| R <sub>6</sub>   | Full seed                                       | Pod containing a green seed that fills the pod cavity at one of the four uppermost nodes on the main stem with a fully developed leaf |                                            |                                                                   |
| R <sub>7</sub>   | Begining maturity                               | one normal pod on the main stem that has reached its mature pod color                                                                 |                                            |                                                                   |
| R <sub>7,1</sub> |                                                 |                                                                                                                                       | Early mature green                         | Up to 50% of yellowing leaves and pods, green seeds               |
| R <sub>7,2</sub> |                                                 |                                                                                                                                       | Physiological maturity                     | Between 51% and 75% yellow leaves and pods, green-yellowish seeds |
| R <sub>7,3</sub> |                                                 |                                                                                                                                       | Early mature yellow                        | More than 75% yellow leaves and pods, yellow seeds                |
| R <sub>8</sub>   | Full maturity                                   | 95% of the pods have reached their mature pod color                                                                                   |                                            | Not used                                                          |
| R <sub>8,1</sub> |                                                 |                                                                                                                                       | Mid mature yellow                          | Up to 50% defoliation, dark yellow pods, yellow seeds             |
| R <sub>8,2</sub> |                                                 |                                                                                                                                       | Late mature yellow                         | 50-80% defoliation, brown-yellow pods, yellow seeds               |
| R <sub>8,3</sub> |                                                 |                                                                                                                                       | Late mature desiccating                    | More than 80% defoliation, brown pods and light brown seeds       |
| R <sub>9</sub>   | Harvest maturity                                | No leaves, dry brown pods and light brown seeds                                                                                       |                                            |                                                                   |
