# Supplementary material for: Molecular characterization of the acquisition of longevity during seed maturation in soybean
Source: PLoS One. 2017 Jul 12;12(7):e0180282. doi: 10.1371/journal.pone.0180282 (PMC5507495; doi:10.1371/journal.pone.0180282)
Supplement: S3 Table — (XLSX) [file pone.0180282.s004.xlsx]

## Sheet: Feuil1
S3 Table . List of differentially expressed genes during seed maturation.
Data are expressed as Log2 intensity values after normalization by DeSeq2. Only those genes with a varation > 1 were retained.
Seeds were freshly harvested and RNA was extracted from the hydrated tissues. Two biological replicates were analysed for stage 7.2 and stage 9
														log2value of expression after normalization
id Gmax v2	glymav1.1	Name (Soybase)	Tax Hit	pvalue	Arabidopsis	pvalue	Name Arabdopsis gene	GO Biological Process Ids	Biological Process Descriptions	GO Molecular Function IDs (6)	Molecular Function Descriptions	GO Cellular Component IDs (7)	Cellular Component Descriptions	7.1	7.2a	7.2b	7.3	8.1	8.2	8.3	9a	9b
Glyma.01G000100	Glyma01g00210	Protein PHYLLO, chloroplastic	PHYLO_ARATH	4e-13	AT1G68890.1	5e-16	magnesium ion binding;thiamin pyrophosphate binding;hydro-lyases;catalytics;2-succinyl-5-enolpyruvyl-6-hydroxy-3-cyclohexene-1-carboxylic-acid synthases	GO:0009063 GO:0009234 GO:0042372 GO:0042550	cellular amino acid catabolic process; "me-quinone biosynthetic process"; "photosystem I stabilization"; "phylloquinone biosynthetic process"	GO:0000287 GO:0003824 GO:0016836 GO:0030976 GO:0070204	2-succinyl-5-enolpyruvyl-6-hydroxy-3-cyclohexene-1-carboxylic-acid synthase activity; "catalytic activity"; "hydro-lyase activity"; "magnesium ion binding"; "thiamine pyrophosphate binding"	GO:0005739	mitochondrion	5.93759	5.72939	5.75081	4.92542	2.81593	3.0674	3.52788	3.59934	3.35441
Glyma.01G000200	#N/A	-	-	-	-	-	-	-	-	-	-	-	-	7.64084	8.36558	8.27272	7.49056	5.55175	5.61092	5.63743	5.69096	5.46954
Glyma.01G000700	Glyma01g00341	-	-	-	AT5G58100.1	2e-77	unknown protein; INVOLVED IN: pollen exine formation; EXPRESSED IN: 19 plant structures; EXPRESSED DURING: 8 growth stages; BEST Arabidopsis thaliana protein match is: unknown protein (TAIR:AT3G28720.1); Has 35333 Blast hits to 34131 proteins in 2444 species: Archae - 798; Bacteria - 22429; Metazoa - 974; Fungi - 991; Plants - 531; Viruses - 0; Other Eukaryotes - 9610 (source: NCBI BLink).	GO:0010584	pollen exine formation	-	-	GO:0005739 GO:0005783 GO:0005794	Golgi apparatus; "endoplasmic reticulum"; "mitochondrion"	5.05251	5.23658	4.4935	4.42912	2.98546	3.65716	2.59569	2.58089	2.4501
Glyma.01G001300	Glyma01g00430	Cycloartenol synthase	CAS1_GLYGL	0	AT2G07050.1	0	cycloartenol synthase 1	GO:0006636 GO:0006655 GO:0009555 GO:0010027 GO:0015995 GO:0016117 GO:0016126 GO:0019288 GO:0019745	carotenoid biosynthetic process; "chlorophyll biosynthetic process"; "isopentenyl diphosphate biosynthetic process, mevalo-te-independent pathway"; "pentacyclic triterpenoid biosynthetic process"; "phosphatidylglycerol biosynthetic process"; "pollen development"; "sterol biosynthetic process"; "thylakoid membrane organization"; "unsaturated fatty acid biosynthetic process"	GO:0003824 GO:0016866 GO:0016871	catalytic activity; "cycloartenol synthase activity"; "intramolecular transferase activity"	GO:0005773	vacuole	9.63641	8.48407	8.11415	7.52326	6.5434	7.2045	6.83664	6.61523	6.38658
Glyma.01G001400	Glyma01g00440	Reticulon-like protein	K7K111_SOYBN	6e-74	AT3G19460.1	4e-32	Reticulon family protein	GO:0008150	biological process	GO:0003674	molecular function	GO:0005783	endoplasmic reticulum	NA	NA	NA	NA	-1.35736	-1.01334	1.1857	1.26212	0.675164
Glyma.01G001800	Glyma01g00481	Receptor-like protein kinase	G7LIV0_MEDTR	0	AT5G35390.1	6e-19	Leucine-rich repeat protein kinase family protein	-	-	GO:0003824 GO:0030170	catalytic activity; "pyridoxal phosphate binding"	GO:0005886	plasma membrane	1.57884	1.8529	0.498864	3.14356	6.19077	7.27386	6.90198	6.8941	6.83123
Glyma.01G002100	Glyma01g00510	Auxin response factor	I1J4B0_SOYBN	0	AT1G19220.1	0	auxin response factor 19	GO:0006355 GO:0007155 GO:0009723 GO:0009725 GO:0009733 GO:0009741 GO:0010090 GO:0010311 GO:0010583 GO:0045010 GO:0048366 GO:0048527 GO:0048765 GO:0071555	actin nucleation; "cell adhesion"; "cell wall organization"; "lateral root development"; "lateral root formation"; "leaf development"; "regulation of transcription, D--dependent"; "response to auxin stimulus"; "response to brassinosteroid stimulus"; "response to cyclopentenone"; "response to ethylene stimulus"; "response to hormone stimulus"; "root hair cell differentiation"; "trichome morphogene…	GO:0003677 GO:0003700 GO:0043565 GO:0046983	D- binding; "protein dimerization activity"; "sequence-specific D- binding"; "sequence-specific D- binding transcription factor activity"	GO:0005634	nucleus	7.6013	7.81595	7.66239	7.29096	5.73827	5.15896	4.80445	4.88422	4.56195
Glyma.01G002400	Glyma01g00541	Phospholipase A21	B9SCE0_RICCO	4e-71	AT2G06925.1	1e-73	Phospholipase A2 family protein	-	-	GO:0004623	phospholipase A2 activity	GO:0005576 GO:0005773 GO:0005794	Golgi apparatus; "extracellular region"; "vacuole"	8.06572	6.49177	6.58803	4.69674	NA	NA	NA	NA	NA
Glyma.01G002600	Glyma01g00560	Type I phosphodiesterase/nucleotide pyrophosphatase family protein	D7MCJ0_ARALL	0	AT4G29680.1	0	Alkaline-phosphatase-like family protein	GO:0000394 GO:0008152 GO:0009086 GO:0009117	R- splicing, via endonucleolytic cleavage and ligation; "metabolic process"; "methionine biosynthetic process"; "nucleotide metabolic process"	GO:0003824 GO:0016787	catalytic activity; "hydrolase activity"	GO:0005634 GO:0005773	nucleus; "vacuole"	6.83071	5.98962	5.74965	4.75008	3.64477	4.00528	3.80287	3.80448	3.7111
Glyma.01G003400	Glyma01g00640	Pentatricopeptide repeat-containing protein	G7KJ88_MEDTR	0	AT2G15690.1	1e-142	Tetratricopeptide repeat (TPR)-like superfamily protein	GO:0008150	biological process	GO:0003674	molecular function	GO:0005739	mitochondrion	5.7398	6.72447	6.30052	6.79392	4.70518	4.19624	4.593	4.57541	4.13904
Glyma.01G003500	Glyma01g00660	Pollen specific protein SF21	G7LJK8_MEDTR	9e-163	AT5G56750.1	1e-153	N-MYC downregulated-like 1	GO:0030154 GO:0060918	auxin transport; "cell differentiation"	GO:0003674	molecular function	GO:0005737	cytoplasm	-0.469402	-1.00977	-1.15491	2.62804	1.34225	2.18062	1.1338	1.06224	2.19155
Glyma.01G004000	Glyma01g00710	Phospholipase A2 beta	D7P7X4_CITSI	4e-50	AT4G29460.1	4e-46	Phospholipase A2 family protein	GO:0009555 GO:0009846 GO:0009860	pollen development; "pollen germi-tion"; "pollen tube growth"	GO:0004623	phospholipase A2 activity	GO:0005576 GO:0005783 GO:0005794	Golgi apparatus; "endoplasmic reticulum"; "extracellular region"	2.20805	1.33317	0.939277	-1.52331	-0.639723	-0.986998	-0.891919	-0.91204	0.618643
Glyma.01G004400	Glyma01g00750	Pentatricopeptide repeat-containing protein	D7L337_ARALL	0	AT3G14330.1	0	Tetratricopeptide repeat (TPR)-like superfamily protein	GO:0008150 GO:0016556	biological process; "mR- modification"	-	-	GO:0005739	mitochondrion	3.35027	3.94686	2.60255	4.77439	6.68743	7.43289	6.86385	6.55894	6.48049
Glyma.01G004800	Glyma01g00790	Protein root hair specific 16	F4JMW3_ARATH	0	AT4G29180.2	0	root hair specific 16	GO:0006468 GO:0048765	protein phosphorylation; "root hair cell differentiation"	GO:0004672 GO:0004674 GO:0004713 GO:0005524 GO:0016301 GO:0016772	ATP binding; "ki-se activity"; "protein ki-se activity"; "protein serine/threonine ki-se activity"; "protein tyrosine ki-se activity"; "transferase activity, transferring phosphorus-containing groups"	GO:0005886	plasma membrane	4.50703	3.36721	3.93593	1.42834	NA	-0.00299611	0.11726	0.0787796	-0.0798389
Glyma.01G005100	Glyma01g00840	Inositol oxygenase	G7LJN9_MEDTR	4e-157	AT2G19800.1	2e-156	myo-inositol oxygenase 2	GO:0006949 GO:0019310 GO:0055114	inositol catabolic process; "oxidation-reduction process"; "syncytium formation"	GO:0005506 GO:0050113	inositol oxyge-se activity; "iron ion binding"	GO:0005737	cytoplasm	NA	NA	NA	4.95844	4.40697	4.76043	1.92794	1.82996	1.93503
Glyma.01G005200	Glyma01g00850	Gamma-glutamyltranspeptidase	G7KHZ7_MEDTR	0	AT4G29210.1	0	gamma-glutamyl transpeptidase 4	GO:0006751 GO:0006805	glutathione catabolic process; "xenobiotic metabolic process"	GO:0003840 GO:0016756	gamma-glutamyltransferase activity; "glutathione gamma-glutamylcysteinyltransferase activity"	GO:0005773	vacuole	7.14759	8.23187	7.78183	7.10315	5.27061	5.37296	5.31993	5.25753	5.00538
Glyma.01G005600	Glyma01g00890	Leucine-rich repeat family protein / extensin family protein	C6ZS06_SOYBN	0	AT4G29240.1	9e-160	Leucine-rich repeat (LRR) family protein	GO:0008150	biological process	-	-	GO:0005576	extracellular region	3.61403	2.00293	1.70519	-1.52331	NA	NA	NA	NA	NA
Glyma.01G006200	Glyma01g00950	-	-	-	-	-	-	-	-	-	-	-	-	9.88963	6.39241	6.19382	3.6991	4.66823	5.88051	5.74318	5.78002	5.63898
Glyma.01G006700	Glyma01g01000	Peptidase M28 family protein	D7LZB3_ARALL	0	AT5G19740.1	0	Peptidase M28 family protein	GO:0006508	proteolysis	GO:0008233 GO:0016805	dipeptidase activity; "peptidase activity"	GO:0005773 GO:0005886	plasma membrane; "vacuole"	8.49461	5.92189	6.01503	3.9944	2.79791	3.29711	3.04572	3.18993	2.89384
Glyma.01G006800	Glyma01g01010	Pectinesterase	I1J4H5_SOYBN	0	AT5G19730.1	0	Pectin lyase-like superfamily protein	GO:0009411 GO:0009813 GO:0042545	cell wall modification; "flavonoid biosynthetic process"; "response to UV"	GO:0030599	pectinesterase activity	GO:0005618 GO:0005737 GO:0009505 GO:0009507	cell wall; "chloroplast"; "cytoplasm"; "plant-type cell wall"	2.7482	1.38735	1.28144	NA	-0.362116	0.592839	-0.891919	-0.91204	-1.07126
Glyma.01G007000	Glyma01g01030	IQ domain-containing protein	G7LGP8_MEDTR	4e-109	AT3G16490.1	2e-88	IQ-domain 26	GO:0008150	biological process	GO:0005516	calmodulin binding	GO:0005794	Golgi apparatus	3.69004	2.73636	2.59123	0.774788	NA	NA	-1.10717	-1.08887	NA
Glyma.01G007400	Glyma01g01080	Receptor-like protein kinase	G7KPN7_MEDTR	0	AT5G25930.1	0	Protein kinase family protein with leucine-rich repeat domain	GO:0002679 GO:0006468 GO:0006612 GO:0006944 GO:0009723 GO:0009738 GO:0010200 GO:0010363 GO:0035556 GO:0043069 GO:0052542	abscisic acid mediated sig-ling pathway; "cellular membrane fusion"; "defense response by callose deposition"; "intracellular sig-l transduction"; "negative regulation of programmed cell death"; "protein phosphorylation"; "protein targeting to membrane"; "regulation of plant-type hypersensitive response"; "respiratory burst involved in defense response"; "response to chitin"; "response to ethylen…	GO:0004672 GO:0004674 GO:0005524 GO:0016301 GO:0016772	ATP binding; "ki-se activity"; "protein ki-se activity"; "protein serine/threonine ki-se activity"; "transferase activity, transferring phosphorus-containing groups"	GO:0005886 GO:0016020	membrane; "plasma membrane"	5.26467	4.23014	3.97249	2.92459	6.91637	8.11378	7.80175	7.76484	7.60488
Glyma.01G007800	Glyma01g01120	Cytosine-specific methyltransferase	K7K149_SOYBN	0	AT1G69770.1	0	chromomethylase 3	GO:0006260 GO:0006261 GO:0006270 GO:0006275 GO:0006306 GO:0006342 GO:0006346 GO:0008283 GO:0009909 GO:0010069 GO:0010425 GO:0016458 GO:0016572 GO:0031047 GO:0031048 GO:0034968 GO:0045814 GO:0051567 GO:0051726	D--dependent D- replication; "D- methylation"; "D- methylation on cytosine within a CNG sequence"; "D- replication"; "D- replication initiation"; "cell proliferation"; "chromatin silencing"; "chromatin silencing by small R-"; "gene silencing"; "gene silencing by R-"; "histone H3-K9 methylation"; "histone lysine methylation"; "histone phosphorylation"; "methylation-dependent chromatin silencing"; …	GO:0003677 GO:0003886	D- (cytosine-5-)-methyltransferase activity; "D- binding"	GO:0005634	nucleus	4.21395	2.66126	2.24606	0.0555561	1.49911	1.99682	1.41454	1.35109	1.25805
Glyma.01G008000	Glyma01g01140	Cytochrome b5 domain-containing family protein	B9ILU4_POPTR	2e-55	AT1G60660.1	1e-47	cytochrome B5-like protein	GO:0016126	sterol biosynthetic process	GO:0020037	heme binding	GO:0005739	mitochondrion	7.49565	4.7823	4.69677	2.88293	1.95136	1.63411	0.936542	0.970544	-1.07126
Glyma.01G008500	Glyma01g01180	Malic enzyme	I1J4J6_SOYBN	0	AT1G79750.1	0	NADP-malic enzyme 4	GO:0006094 GO:0006108 GO:0006633 GO:0007010 GO:0009793 GO:0009845 GO:0010498 GO:0051289 GO:0055114	cytoskeleton organization; "embryo development ending in seed dormancy"; "fatty acid biosynthetic process"; "gluconeogenesis"; "malate metabolic process"; "oxidation-reduction process"; "proteasomal protein catabolic process"; "protein homotetramerization"; "seed germi-tion"	GO:0000166 GO:0004470 GO:0004473 GO:0008270 GO:0016491 GO:0016616 GO:0016619 GO:0016652 GO:0042803 GO:0046872 GO:0050897 GO:0051287	-D binding; "cobalt ion binding"; "malate dehydroge-se (oxaloacetate-decarboxylating) (-DP+) activity"; "malate dehydroge-se (oxaloacetate-decarboxylating) activity"; "malic enzyme activity"; "metal ion binding"; "nucleotide binding"; "oxidoreductase activity"; "oxidoreductase activity, acting on -D(P)H, -D(P) as acceptor"; "oxidoreductase activity, acting on the CH-OH group of donors, -D or -DP …	GO:0009507	chloroplast	8.00657	6.50708	6.15191	4.63203	1.49911	2.52372	2.55749	2.45566	2.39033
Glyma.01G008700	Glyma01g01210	RNA-dependent RNA polymerase family protein	D7L6F2_ARALL	0	AT2G19930.1	0	RNA-dependent RNA polymerase family protein	GO:0009410 GO:0009640 GO:0009793 GO:0009845 GO:0009855 GO:0009909 GO:0009933 GO:0009944 GO:0010014 GO:0010075 GO:0010162 GO:0010182 GO:0010228 GO:0016441 GO:0016567 GO:0019915 GO:0048522 GO:0050826	determi-tion of bilateral symmetry; "embryo development ending in seed dormancy"; "lipid storage"; "meristem initiation"; "meristem structural organization"; "photomorphogenesis"; "polarity specification of adaxial/abaxial axis"; "positive regulation of cellular process"; "posttranscriptio-l gene silencing"; "protein ubiquiti-tion"; "regulation of flower development"; "regulation of meristem grow…	GO:0003968	R--directed R- polymerase activity	GO:0005575	cellular component	5.15371	3.83756	4.04891	3.29966	1.0549	2.09707	2.81915	2.80221	2.81423
Glyma.01G009000	Glyma01g01240	Avr9/Cf-9 rapidly elicited protein 146	Q9FQZ6_TOBAC	4e-36	AT4G29110.1	1e-30	unknown protein; FUNCTIONS IN: molecular_function unknown; INVOLVED IN: response to chitin; LOCATED IN: vacuole; BEST Arabidopsis thaliana protein match is: unknown protein (TAIR:AT1G52140.1); Has 109 Blast hits to 109 proteins in 16 species: Archae - 0; Bacteria - 0; Metazoa - 0; Fungi - 0; Plants - 109; Viruses - 0; Other Eukaryotes - 0 (source: NCBI BLink).	GO:0010200	response to chitin	GO:0003674	molecular function	GO:0005773	vacuole	2.51654	1.49131	1.12782	0.0969565	NA	NA	NA	NA	-0.927841
Glyma.01G009500	Glyma01g01291	Similar to isoflavone reductase homolog	L0P1B3_LUPAN	2e-43	AT1G32100.1	7e-36	pinoresinol reductase 1	GO:0009807 GO:0010413 GO:0045492	glucuronoxylan metabolic process; "lig-n biosynthetic process"; "xylan biosynthetic process"	GO:0000166 GO:0010283	nucleotide binding; "pinoresinol reductase activity"	GO:0005737	cytoplasm	4.50973	2.18603	2.67389	NA	1.4615	0.00114721	NA	NA	-0.927841
Glyma.01G009600	Glyma01g01300	Similar to myb family transcription factor APL	L0P0W8_LUPAN	3e-138	AT5G45580.1	4e-75	Homeodomain-like superfamily protein	GO:0006355	regulation of transcription, D--dependent	GO:0003700	sequence-specific D- binding transcription factor activity	GO:0005634	nucleus	1.40925	0.884272	0.835927	-1.52331	-0.362116	0.00114721	NA	NA	NA
Glyma.01G009700	Glyma01g01310	-	-	-	-	-	-	-	-	-	-	-	-	8.20504	5.84292	5.5121	3.63675	1.96727	1.88057	0.87055	0.93341	0.0814936
Glyma.01G009900	Glyma01g01340	Plastidal glycolate/glycerate translocator 1, chloroplastic	PLGG1_ARATH	0	AT1G32080.1	0	membrane protein, putative	GO:0009658 GO:0010027 GO:0030003 GO:0070838	cellular cation homeostasis; "chloroplast organization"; "divalent metal ion transport"; "thylakoid membrane organization"	-	-	GO:0005886 GO:0009507 GO:0009706 GO:0009941 GO:0016020	chloroplast; "chloroplast envelope"; "chloroplast inner membrane"; "membrane"; "plasma membrane"	7.07182	6.39113	5.9554	5.32203	4.06267	3.95939	3.50213	3.526	3.41311
Glyma.01G010200	Glyma01g01370	Phosphoribulokinase	I1J4L6_SOYBN	0	AT1G32060.1	0	phosphoribulokinase	GO:0000165 GO:0005975 GO:0006098 GO:0006364 GO:0006612 GO:0008152 GO:0009058 GO:0009409 GO:0009595 GO:0009637 GO:0009657 GO:0009697 GO:0009773 GO:0009814 GO:0009862 GO:0009867 GO:0009902 GO:0010103 GO:0010114 GO:0010200 GO:0010207 GO:0010218 GO:0010310 GO:0010363 GO:0015979 GO:0018119 GO:0019344 GO:0019684 GO:0031348 GO:0035304 GO:0042742 GO:0043900 GO:0050832	MAPK cascade; "biosynthetic process"; "carbohydrate metabolic process"; "chloroplast relocation"; "cysteine biosynthetic process"; "defense response, incompatible interaction"; "defense response to bacterium"; "defense response to fungus"; "detection of biotic stimulus"; "jasmonic acid mediated sig-ling pathway"; "metabolic process"; "negative regulation of defense response"; "pentose-phosphate s…	GO:0005515 GO:0005524 GO:0008974 GO:0016301	ATP binding; "ki-se activity"; "phosphoribuloki-se activity"; "protein binding"	GO:0009507 GO:0009535 GO:0009570 GO:0009579 GO:0009941 GO:0010319 GO:0016020 GO:0048046	apoplast; "chloroplast"; "chloroplast envelope"; "chloroplast stroma"; "chloroplast thylakoid membrane"; "membrane"; "stromule"; "thylakoid"	7.31427	4.90893	4.70926	3.22823	0.844749	1.02081	0.936542	0.970544	-1.07126
Glyma.01G010500	Glyma01g01400	NBS-LRR type disease resistance protein	C6ZS43_SOYBN	0	AT3G07040.1	1e-149	NB-ARC domain-containing disease resistance protein	GO:0006952 GO:0009626	defense response; "plant-type hypersensitive response"	GO:0000166 GO:0005515 GO:0043531	ADP binding; "nucleotide binding"; "protein binding"	GO:0005886	plasma membrane	9.28547	6.54441	6.72826	3.78552	0.212256	1.02081	0.0047454	0.00190919	0.00225974
Glyma.01G011300	Glyma01g01480	Pentatricopeptide repeat-containing protein	G7K9K3_MEDTR	0	AT1G31920.1	0	Tetratricopeptide repeat (TPR)-like superfamily protein	GO:0008150 GO:0010075 GO:0016556	biological process; "mR- modification"; "regulation of meristem growth"	-	-	GO:0005739	mitochondrion	5.5017	4.25746	4.0536	3.14697	2.58072	2.55181	2.27685	2.1764	2.56198
Glyma.01G011500	Glyma01g01500	Lipase class 3 family protein	U5G3G7_POPTR	3e-98	AT4G16070.1	2e-87	Mono-/di-acylglycerol lipase, N-terminal;Lipase, class 3	GO:0006629 GO:0016042	lipid catabolic process; "lipid metabolic process"	GO:0004091 GO:0004806	carboxylesterase activity; "triglyceride lipase activity"	GO:0005886	plasma membrane	NA	NA	-0.860516	NA	-1.35736	1.28297	1.41454	1.35109	1.25805
Glyma.01G011700	Glyma01g01521	Pentatricopeptide repeat-containing protein	G7K9K3_MEDTR	0	AT1G31920.1	0	Tetratricopeptide repeat (TPR)-like superfamily protein	GO:0008150 GO:0010075 GO:0016556	biological process; "mR- modification"; "regulation of meristem growth"	-	-	GO:0005739	mitochondrion	2.51738	2.40101	0.939277	1.02941	-0.639723	-0.986998	0.0047454	0.00190919	-1.07126
Glyma.01G011800	Glyma01g01530	-	-	-	-	-	-	-	-	-	-	-	-	-1.49729	-1.02355	0.171962	-1.52331	NA	NA	1.44228	1.53161	NA
Glyma.01G013300	Glyma01g01700	Ankyrin repeat-containing protein	G7K9M3_MEDTR	5e-175	AT3G18670.1	2e-85	Ankyrin repeat family protein	-	-	-	-	-	-	1.84668	1.13761	1.08245	-1.52331	NA	NA	NA	NA	NA
Glyma.01G013900	Glyma01g01770	Xyloglucan endotransglycosylase 2 family protein	U5GUJ5_POPTR	2e-172	AT1G32170.1	2e-163	xyloglucan endotransglucosylase/hydrolase 30	GO:0005975 GO:0006073	carbohydrate metabolic process; "cellular glucan metabolic process"	GO:0004553 GO:0016762 GO:0016798	hydrolase activity, acting on glycosyl bonds; "hydrolase activity, hydrolyzing O-glycosyl compounds"; "xyloglucan:xyloglucosyl transferase activity"	GO:0005618 GO:0048046	apoplast; "cell wall"	6.62654	6.5447	6.31647	5.73295	1.29575	0.602284	NA	NA	NA
Glyma.01G014000	Glyma01g01780	Cellulose synthase-like protein	G7KCB0_MEDTR	0	AT3G03050.1	0	cellulose synthase-like D3	GO:0000271 GO:0009409 GO:0009832 GO:0010583 GO:0030244	cellulose biosynthetic process; "plant-type cell wall biogenesis"; "polysaccharide biosynthetic process"; "response to cold"; "response to cyclopentenone"	GO:0016757 GO:0016759 GO:0051753	cellulose synthase activity; "man-n synthase activity"; "transferase activity, transferring glycosyl groups"	GO:0005768 GO:0005783 GO:0005794 GO:0005802 GO:0005886 GO:0016020	Golgi apparatus; "endoplasmic reticulum"; "endosome"; "membrane"; "plasma membrane"; "trans-Golgi network"	9.10688	7.51925	7.67094	6.88516	5.75862	5.52214	5.97415	5.79158	5.56539
Glyma.01G014100	Glyma01g01790	Abhydrolase domain-containing protein FAM108C1	G7KCB2_MEDTR	0	AT1G32190.1	2e-167	alpha/beta-Hydrolases superfamily protein	GO:0006499 GO:0009855 GO:0009944 GO:0010014 GO:0010075	N-termi-l protein myristoylation; "determi-tion of bilateral symmetry"; "meristem initiation"; "polarity specification of adaxial/abaxial axis"; "regulation of meristem growth"	GO:0016787	hydrolase activity	GO:0005576 GO:0005886	extracellular region; "plasma membrane"	2.45457	1.23619	1.71705	NA	-1.35736	-1.01334	NA	NA	NA
Glyma.01G014500	Glyma01g01840	-	-	-	-	-	-	-	-	-	-	-	-	8.5025	8.06845	8.0241	7.23342	4.87583	4.93986	5.16771	5.26246	4.74292
Glyma.01G014600	Glyma01g01850	Homeobox-leucine zipper protein ROC3	G7KCC4_MEDTR	0	AT5G46880.1	0	homeobox-7	GO:0006355 GO:0006944 GO:0048497	cellular membrane fusion; "mainte-nce of floral organ identity"; "regulation of transcription, D--dependent"	GO:0003677 GO:0003700 GO:0043565	D- binding; "sequence-specific D- binding"; "sequence-specific D- binding transcription factor activity"	GO:0005634	nucleus	8.29859	5.35366	4.83522	2.6462	0.0476376	1.53107	1.69272	1.61149	1.50838
Glyma.01G015400	Glyma01g01940	OSJNBa0009P12.33 protein	A3AX00_ORYSJ	7e-08	AT2G35470.1	9e-19	unknown protein; Has 25 Blast hits to 25 proteins in 8 species: Archae - 0; Bacteria - 0; Metazoa - 0; Fungi - 0; Plants - 25; Viruses - 0; Other Eukaryotes - 0 (source: NCBI BLink).	GO:0008150	biological process	GO:0003674	molecular function	GO:0005739	mitochondrion	7.89782	6.14127	6.51678	4.84005	3.1676	2.74586	3.11521	3.07786	3.43617
Glyma.01G015600	Glyma01g01960	Syntaxin	Q8LJR4_SOYBN	6e-166	AT5G46860.1	4e-144	Syntaxin/t-SNARE family protein	GO:0000902 GO:0006623 GO:0006886 GO:0006944 GO:0007030 GO:0007033 GO:0009556 GO:0009660 GO:0009959 GO:0010118 GO:0016049 GO:0016192 GO:0016197 GO:0048193 GO:0052543	Golgi organization; "Golgi vesicle transport"; "amyloplast organization"; "callose deposition in cell wall"; "cell growth"; "cell morphogenesis"; "cellular membrane fusion"; "endosomal transport"; "intracellular protein transport"; "microsporogenesis"; "negative gravitropism"; "protein targeting to vacuole"; "stomatal movement"; "vacuole organization"; "vesicle-mediated transport"	GO:0005484 GO:0005515	S-P receptor activity; "protein binding"	GO:0000325 GO:0005770 GO:0005773 GO:0005794 GO:0009705 GO:0030140	Golgi apparatus; "late endosome"; "plant-type vacuole"; "plant-type vacuole membrane"; "trans-Golgi network transport vesicle"; "vacuole"	8.43529	5.73517	5.82053	3.47192	3.68894	4.596	3.99852	3.99587	3.52889
Glyma.01G016000	Glyma01g02020	-	-	-	-	-	-	-	-	-	-	-	-	2.1246	1.92216	1.95928	1.84318	-0.362116	0.592839	0.0047454	0.00190919	-1.07126
Glyma.01G016300	#N/A	E3 ubiquitin-protein ligase RNF14	G7KDN8_MEDTR	3e-40	AT1G32340.1	7e-19	NDR1/HIN1-like 8	GO:0006487 GO:0006499 GO:0008150 GO:0009610	N-termi-l protein myristoylation; "biological process"; "protein N-linked glycosylation"; "response to symbiotic fungus"	GO:0008270	zinc ion binding	GO:0005634	nucleus	3.76518	3.4515	3.22536	2.42313	1.61395	0.574819	1.00604	1.00061	1.62926
Glyma.01G016500	Glyma01g02060	ABC transporter B family member	G7KDP1_MEDTR	0	AT4G25960.1	0	P-glycoprotein 2	GO:0006200 GO:0006810 GO:0010048 GO:0010315 GO:0010540 GO:0010541 GO:0043481 GO:0048440 GO:0055085	ATP catabolic process; "acropetal auxin transport"; "anthocyanin accumulation in tissues in response to UV light"; "auxin efflux"; "basipetal auxin transport"; "carpel development"; "transmembrane transport"; "transport"; "ver-lization response"	GO:0000166 GO:0005524 GO:0016887 GO:0017111 GO:0042626	ATP binding; "ATPase activity"; "ATPase activity, coupled to transmembrane movement of substances"; "nucleoside-triphosphatase activity"; "nucleotide binding"	GO:0005886 GO:0009507 GO:0016020 GO:0016021	chloroplast; "integral to membrane"; "membrane"; "plasma membrane"	7.75762	5.05778	4.68439	2.19248	NA	NA	NA	NA	-0.927841
Glyma.01G016700	Glyma01g02080	Inositol-tetrakisphosphate 1-kinase	G7LH14_MEDTR	2e-155	AT5G16760.1	1e-113	Inositol 1,3,4-trisphosphate 5/6-kinase family protein	GO:0010264 GO:0052746	inositol phosphorylation; "myo-inositol hexakisphosphate biosynthetic process"	GO:0000287 GO:0003824 GO:0005524 GO:0046872 GO:0047325 GO:0052725 GO:0052726	ATP binding; "catalytic activity"; "inositol-1,3,4-trisphosphate 5-ki-se activity"; "inositol-1,3,4-trisphosphate 6-ki-se activity"; "inositol tetrakisphosphate 1-ki-se activity"; "magnesium ion binding"; "metal ion binding"	GO:0005622 GO:0005829	cytosol; "intracellular"	6.53328	8.14604	6.16177	8.04144	5.99597	4.99662	5.828	5.83066	6.25896
Glyma.01G017000	Glyma01g02110	TPR domain protein	G7KDQ6_MEDTR	1e-69	AT4G17940.1	8e-52	Tetratricopeptide repeat (TPR)-like superfamily protein	GO:0008150	biological process	-	-	GO:0009507	chloroplast	9.94982	9.53846	9.55862	8.91384	7.00625	6.51217	7.86567	8.24046	8.00382
Glyma.01G017100	Glyma01g02120	Dihydroflavonol-4-reductase	G7KDR3_MEDTR	0	AT2G23910.1	2e-87	NAD(P)-binding Rossmann-fold superfamily protein	GO:0009744 GO:0009809 GO:0009813 GO:0010224 GO:0044237 GO:0080167	cellular metabolic process; "flavonoid biosynthetic process"; "lignin biosynthetic process"; "response to UV-B"; "response to karrikin"; "response to sucrose stimulus"	GO:0000166 GO:0003824 GO:0016621 GO:0050662	catalytic activity; "cin-moyl-CoA reductase activity"; "coenzyme binding"; "nucleotide binding"	GO:0005575	cellular component	8.45481	7.98848	7.73896	7.41875	5.49486	4.837	5.18416	5.22016	5.52823
Glyma.01G017300	Glyma01g02140	RING-H2 finger protein ATL3A	G7KDR5_MEDTR	4e-167	AT3G03550.1	4e-68	RING/U-box superfamily protein	GO:0080167	response to karrikin	GO:0008270	zinc ion binding	GO:0005634	nucleus	2.51738	2.40101	1.58356	1.02941	3.29016	4.90042	5.22745	4.86359	4.6674
Glyma.01G017400	Glyma01g02150	33 kDa ribonucleoprotein	B9MU33_POPTR	1e-87	AT2G35410.1	3e-84	RNA-binding (RRM/RBD/RNP motifs) family protein	GO:0006364 GO:0009902 GO:0010027 GO:0015979 GO:0015995 GO:0019288 GO:0034660 GO:0042793	chlorophyll biosynthetic process; "chloroplast relocation"; "isopentenyl diphosphate biosynthetic process, mevalo-te-independent pathway"; "ncR- metabolic process"; "photosynthesis"; "rR- processing"; "thylakoid membrane organization"; "transcription from plastid promoter"	GO:0000166 GO:0003676 GO:0003723	R- binding; "nucleic acid binding"; "nucleotide binding"	GO:0009507 GO:0009570 GO:0009579	chloroplast; "chloroplast stroma"; "thylakoid"	7.03809	9.38637	8.97015	9.50335	9.68775	10.001	10.4984	10.3714	10.2061
Glyma.01G018100	#N/A	-	-	-	-	-	-	-	-	-	-	-	-	5.56625	3.3569	3.04883	1.06292	NA	NA	-0.114753	-0.081287	NA
Glyma.01G018200	Glyma01g02235	-	-	-	-	-	-	-	-	-	-	-	-	-1.49729	-1.02355	NA	-1.52331	0.503705	1.30728	1.59224	1.58434	0.951408
Glyma.01G018600	Glyma01g02270	-	-	-	-	-	-	-	-	-	-	-	-	6.88405	4.90255	5.1329	3.39431	NA	0.565058	2.25524	2.31589	1.30282
Glyma.01G018800	Glyma01g02290	Abscisic acid receptor PYR1	G7KF38_MEDTR	1e-110	AT5G46790.1	8e-91	PYR1-like 1	GO:0006569 GO:0009684 GO:0009738 GO:0019761 GO:0080163	abscisic acid mediated sig-ling pathway; "glucosinolate biosynthetic process"; "indoleacetic acid biosynthetic process"; "regulation of protein serine/threonine phosphatase activity"; "tryptophan catabolic process"	GO:0004872 GO:0005515 GO:0010427 GO:0042803	abscisic acid binding; "protein binding"; "protein homodimerization activity"; "receptor activity"	GO:0005634	nucleus	6.30342	4.80052	4.70262	4.03905	-0.639723	0.565058	1.35783	1.33157	1.30282
Glyma.01G019000	Glyma01g02300	Mitochondrial carnitine/acylcarnitine carrier-like protein	G7KF41_MEDTR	0	AT5G46800.1	9e-176	Mitochondrial substrate carrier family protein	GO:0006810 GO:0006839 GO:0015822 GO:0055085	mitochondrial transport; "ornithine transport"; "transmembrane transport"; "transport"	GO:0005215	transporter activity	GO:0005739 GO:0005743 GO:0009507 GO:0009536	chloroplast; "mitochondrial inner membrane"; "mitochondrion"; "plastid"	6.78407	5.94556	5.69511	5.29491	0.977188	-0.986998	0.54722	0.563364	-1.07126
Glyma.01G019200	Glyma01g02330	Phosphoenolpyruvate carboxykinase	Q94LX7_FLAPR	0	AT4G37870.1	0	phosphoenolpyruvate carboxykinase 1	GO:0006094 GO:0009817 GO:0016036 GO:0046686	cellular response to phosphate starvation; "defense response to fungus, incompatible interaction"; "gluconeogenesis"; "response to cadmium ion"	GO:0004611 GO:0004612 GO:0005524 GO:0017076	ATP binding; "phosphoenolpyruvate carboxyki-se (ATP) activity"; "phosphoenolpyruvate carboxyki-se activity"; "purine nucleotide binding"	GO:0005634 GO:0005730 GO:0005737 GO:0005829 GO:0016020	cytoplasm; "cytosol"; "membrane"; "nucleolus"; "nucleus"	9.65978	8.71122	8.7136	8.05637	3.39948	2.02495	1.59224	1.58434	1.30282
Glyma.01G019300	Glyma01g02340	Zinc finger protein	A9YWQ9_MEDTR	0	AT2G22680.1	0	Zinc finger (C3HC4-type RING finger) family protein	GO:0009062 GO:0009690 GO:0016132	brassinosteroid biosynthetic process; "cytokinin metabolic process"; "fatty acid catabolic process"	GO:0004842 GO:0008270	ubiquitin-protein ligase activity; "zinc ion binding"	GO:0005576	extracellular region	3.40456	2.62281	2.47509	0.774788	NA	NA	-1.10717	-1.08887	-0.927841
Glyma.01G019400	Glyma01g02350	Auxin-induced protein	I1J4W6_SOYBN	0	AT5G65670.2	1e-144	indole-3-acetic acid inducible 9	GO:0006355 GO:0009616 GO:0009733 GO:0009734 GO:0010050 GO:0010583	auxin mediated sig-ling pathway; "regulation of transcription, D--dependent"; "response to auxin stimulus"; "response to cyclopentenone"; "vegetative phase change"; "virus induced gene silencing"	GO:0003700 GO:0046983	protein dimerization activity; "sequence-specific D- binding transcription factor activity"	GO:0005634	nucleus	7.26374	5.60664	5.48703	4.23126	2.58046	2.49664	2.69559	2.57724	2.36209
Glyma.01G019700	Glyma01g02390	BHLH transcription factor	A9YWR2_MEDTR	0	AT5G65640.1	4e-87	beta HLH protein 93	-	-	GO:0003677 GO:0003700	D- binding; "sequence-specific D- binding transcription factor activity"	GO:0005634	nucleus	9.77135	7.1712	7.11449	4.62396	-0.362116	0.00114721	0.462664	0.511221	-0.927841
Glyma.01G019800	Glyma01g02400	Glycine-rich protein	A9YWR4_MEDTR	0	AT2G22660.2	0	Protein of unknown function (duplicated DUF1399)	GO:0008150	biological process	GO:0003674	molecular function	GO:0005634 GO:0005737 GO:0005886	cytoplasm; "nucleus"; "plasma membrane"	10.9594	9.00031	9.06164	8.2716	7.93108	7.88134	7.80395	7.77485	7.61108
Glyma.01G020100	Glyma01g02451	Nodulation receptor kinase A	D8V144_SOYBN	0	AT1G67720.1	7e-131	Leucine-rich repeat protein kinase family protein	GO:0006468 GO:0007267 GO:0009616 GO:0010267 GO:0035196	cell-cell sig-ling; "production of miR-s involved in gene silencing by miR-"; "production of ta-siR-s involved in R- interference"; "protein phosphorylation"; "virus induced gene silencing"	GO:0004672 GO:0004674 GO:0005524 GO:0016301 GO:0016772	ATP binding; "ki-se activity"; "protein ki-se activity"; "protein serine/threonine ki-se activity"; "transferase activity, transferring phosphorus-containing groups"	GO:0005886	plasma membrane	2.66619	3.26894	3.16379	3.97777	4.52731	5.58306	5.70785	5.6661	5.541
Glyma.01G020400	Glyma01g02510	-	-	-	-	-	-	-	-	-	-	-	-	3.21889	2.05728	2.01955	-0.52691	NA	NA	NA	NA	NA
Glyma.01G020500	Glyma01g02525	MADS-box protein	G7KGG1_MEDTR	8e-124	AT4G37940.1	2e-88	AGAMOUS-like 21	GO:0006355 GO:0006944 GO:0009556 GO:0009691 GO:0010413 GO:0045492 GO:0048481 GO:0052543	callose deposition in cell wall; "cellular membrane fusion"; "cytokinin biosynthetic process"; "glucuronoxylan metabolic process"; "microsporogenesis"; "ovule development"; "regulation of transcription, D--dependent"; "xylan biosynthetic process"	GO:0003700 GO:0005515 GO:0008134	protein binding; "sequence-specific D- binding transcription factor activity"; "transcription factor binding"	GO:0005634	nucleus	2.80699	3.19432	3.43041	2.21175	-0.639723	NA	NA	NA	-0.927841
Glyma.01G020900	Glyma01g02570	Cinnamyl-alcohol dehydrogenase family protein	B9IIG5_POPTR	0	AT4G37980.1	5e-177	elicitor-activated gene 3-1	GO:0009617 GO:0009626 GO:0009809 GO:0055114	lignin biosynthetic process; "oxidation-reduction process"; "plant-type hypersensitive response"; "response to bacterium"	GO:0000166 GO:0008270 GO:0016491 GO:0016747 GO:0045551	cin-myl-alcohol dehydroge-se activity; "nucleotide binding"; "oxidoreductase activity"; "transferase activity, transferring acyl groups other than amino-acyl groups"; "zinc ion binding"	GO:0005737	cytoplasm	6.52036	3.27065	3.02536	-1.52331	-1.35736	-1.01334	NA	NA	NA
Glyma.01G021000	Glyma01g02580	Cinnamyl alcohol dehydrogenase	G7KGI0_MEDTR	0	AT4G37990.1	2e-175	elicitor-activated gene 3-2	GO:0006865 GO:0009407 GO:0009617 GO:0009626 GO:0009809 GO:0010583 GO:0055114	amino acid transport; "lignin biosynthetic process"; "oxidation-reduction process"; "plant-type hypersensitive response"; "response to bacterium"; "response to cyclopentenone"; "toxin catabolic process"	GO:0000166 GO:0008270 GO:0016491 GO:0045551 GO:0047681	aryl-alcohol dehydroge-se (-DP+) activity; "cin-myl-alcohol dehydroge-se activity"; "nucleotide binding"; "oxidoreductase activity"; "zinc ion binding"	GO:0005737	cytoplasm	2.48847	4.43943	2.09995	3.40437	-1.35736	-1.01334	NA	NA	NA
Glyma.01G021300	Glyma01g02630	Exostosin-like protein	G7KGK1_MEDTR	0	AT4G38040.1	0	Exostosin family protein	GO:0008150	biological process	GO:0003824	catalytic activity	GO:0005768 GO:0005794 GO:0005802 GO:0016020	Golgi apparatus; "endosome"; "membrane"; "trans-Golgi network"	7.69498	5.9098	5.64252	4.4133	2.66096	3.13597	3.60058	3.65437	3.33079
Glyma.01G021400	Glyma01g02640	Poly(RC)-binding protein	G7JWB3_MEDTR	0	AT2G22600.1	9e-107	RNA-binding KH domain-containing protein	GO:0008150	biological process	GO:0003676 GO:0003723	R- binding; "nucleic acid binding"	GO:0005634	nucleus	8.75253	7.12129	7.24358	5.39767	3.43542	3.31861	3.95521	4.01451	3.7111
Glyma.01G021700	Glyma01g02670	Glucosyltransferase-11 (Fragment)	Q8S998_PHAAN	0	AT1G22380.1	3e-91	UDP-glucosyl transferase 85A3	GO:0008152 GO:0015824	metabolic process; "proline transport"	GO:0015020 GO:0016757 GO:0016758	glucuronosyltransferase activity; "transferase activity, transferring glycosyl groups"; "transferase activity, transferring hexosyl groups"	GO:0005575	cellular component	5.26382	9.55927	9.59056	7.97858	3.60309	4.9311	6.11484	5.96911	6.35636
Glyma.01G021900	Glyma01g02691	Glucosyltransferase-12	Q8S997_PHAAN	2e-150	AT1G22360.1	6e-39	UDP-glucosyl transferase 85A2	GO:0008152	metabolic process	GO:0008194 GO:0015020 GO:0016757 GO:0016758	UDP-glycosyltransferase activity; "glucuronosyltransferase activity"; "transferase activity, transferring glycosyl groups"; "transferase activity, transferring hexosyl groups"	GO:0005634	nucleus	0.0389396	0.610153	2.25623	0.810636	-0.639723	NA	NA	NA	-0.927841
Glyma.01G022200	#N/A	Patatin-like phospholipase (Fragment)	G1FMF2_POPTN	4e-42	AT3G63200.1	5e-40	PATATIN-like protein 9	GO:0006629 GO:0008152 GO:0010075	lipid metabolic process; "metabolic process"; "regulation of meristem growth"	GO:0045735	nutrient reservoir activity	GO:0005576	extracellular region	NA	NA	-0.860516	1.57341	2.79523	3.80924	3.57705	3.58317	3.998
Glyma.01G022300	Glyma01g02740	Glucosyltransferase-2	Q8S9A7_PHAAN	0	AT1G22380.1	2e-96	UDP-glucosyl transferase 85A3	GO:0008152 GO:0015824	metabolic process; "proline transport"	GO:0015020 GO:0016757 GO:0016758	glucuronosyltransferase activity; "transferase activity, transferring glycosyl groups"; "transferase activity, transferring hexosyl groups"	GO:0005575	cellular component	5.26509	7.89522	8.04871	6.27012	3.02065	3.79169	4.35708	4.24536	4.59597
Glyma.01G022500	Glyma01g02760	AP2-like ethylene-responsive transcription factor BBM	G7JWC7_MEDTR	0	AT5G10510.2	0	AINTEGUMENTA-like 6	GO:0006355 GO:0009855 GO:0009887 GO:0009908 GO:0009944 GO:0010014 GO:0010075 GO:0010080 GO:0010089 GO:0010492 GO:0035265 GO:0044036 GO:0048364 GO:0060771 GO:0060772 GO:0060774	auxin mediated sig-ling pathway involved in phyllotactic patterning; "cell wall macromolecule metabolic process"; "determi-tion of bilateral symmetry"; "flower development"; "leaf phyllotactic patterning"; "mainte-nce of shoot apical meristem identity"; "meristem initiation"; "organ growth"; "organ morphogenesis"; "phyllotactic patterning"; "polarity specification of adaxial/abaxial axis"; "regul…	GO:0003677 GO:0003700	D- binding; "sequence-specific D- binding transcription factor activity"	GO:0005634	nucleus	8.9079	11.6407	11.4505	10.9091	8.40118	8.01461	8.31419	8.26005	8.29599
Glyma.01G022600	Glyma01g02780	U-box domain-containing protein	G7JWD7_MEDTR	0	AT5G65500.1	0	U-box domain-containing protein kinase family protein	GO:0006468 GO:0016567	protein phosphorylation; "protein ubiquiti-tion"	GO:0004672 GO:0004713 GO:0004842 GO:0005524 GO:0016301 GO:0016772	ATP binding; "ki-se activity"; "protein ki-se activity"; "protein tyrosine ki-se activity"; "transferase activity, transferring phosphorus-containing groups"; "ubiquitin-protein ligase activity"	GO:0000151 GO:0005634	nucleus; "ubiquitin ligase complex"	5.46004	4.92227	4.22901	4.0618	1.95136	2.02495	1.35783	1.33157	1.83039
Glyma.01G022700	Glyma01g02790	Nucleobase-ascorbate transporter	G7JWD8_MEDTR	0	AT4G38050.1	0	Xanthine/uracil permease family protein	GO:0006810 GO:0055085	transmembrane transport; "transport"	GO:0005215 GO:0022857	transmembrane transporter activity; "transporter activity"	GO:0005886 GO:0016020	membrane; "plasma membrane"	7.97372	7.50324	6.72019	5.79058	4.40493	4.8395	4.30097	4.16139	3.72136
Glyma.01G022800	Glyma01g02800	SGT1-like protein	G7JWE1_MEDTR	0	AT5G65490.1	0	FUNCTIONS IN: molecular_function unknown; INVOLVED IN: biological_process unknown; LOCATED IN: chloroplast; EXPRESSED IN: 22 plant structures; EXPRESSED DURING: 13 growth stages; CONTAINS InterPro DOMAIN/s: SGT1 (InterPro:IPR010770); Has 1807 Blast hits to 1807 proteins in 277 species: Archae - 0; Bacteria - 0; Metazoa - 736; Fungi - 347; Plants - 385; Viruses - 0; Other Eukaryotes - 339 (source:…	GO:0008150	biological process	GO:0003674	molecular function	GO:0009507	chloroplast	8.8829	11.5667	11.6399	11.3861	11.6255	12.3069	12.739	12.694	12.5248
Glyma.01G022900	Glyma01g02810	Kinase interacting (KIP1-like) family protein	F4IJK1_ARATH	0	AT2G22560.1	0	Kinase interacting (KIP1-like) family protein	GO:0042546	cell wall biogenesis	GO:0016757	transferase activity, transferring glycosyl groups	GO:0005737 GO:0005794	Golgi apparatus; "cytoplasm"	0.0674245	-0.0206707	-1.15491	0.0969565	5.04029	6.27161	5.94016	5.42814	5.69077
Glyma.01G023500	Glyma01g02880	Short vegetative phase-like protein	E3NYP9_SOYBN	2e-157	AT2G22540.1	4e-115	K-box region and MADS-box transcription factor family protein	GO:0000165 GO:0006355 GO:0006612 GO:0006944 GO:0009266 GO:0009556 GO:0009617 GO:0009862 GO:0009867 GO:0009910 GO:0009965 GO:0010076 GO:0010310 GO:0010363 GO:0010582 GO:0030154 GO:0031348 GO:0035304 GO:0045892 GO:0045893 GO:0048438 GO:0048481 GO:0052543	MAPK cascade; "callose deposition in cell wall"; "cell differentiation"; "cellular membrane fusion"; "floral meristem determi-cy"; "floral whorl development"; "jasmonic acid mediated sig-ling pathway"; "leaf morphogenesis"; "mainte-nce of floral meristem identity"; "microsporogenesis"; "negative regulation of defense response"; "negative regulation of flower development"; "negative regulation of …	GO:0000900 GO:0003700 GO:0005515	protein binding; "sequence-specific D- binding transcription factor activity"; "translation repressor activity, nucleic acid binding"	GO:0005634	nucleus	2.39611	2.04718	1.58356	1.5	-0.639723	NA	-1.10717	-1.08887	NA
Glyma.01G024000	Glyma01g02950	Mitochondrial 2-oxoglutarate/malate carrier protein	G7JXQ1_MEDTR	0	AT2G22500.1	6e-168	uncoupling protein 5	GO:0006810 GO:0006839 GO:0010200 GO:0015992	mitochondrial transport; "proton transport"; "response to chitin"; "transport"	GO:0005310 GO:0017077	dicarboxylic acid transmembrane transporter activity; "oxidative phosphorylation uncoupler activity"	GO:0005739 GO:0005743 GO:0031966	mitochondrial inner membrane; "mitochondrial membrane"; "mitochondrion"	10.8655	7.99028	8.16738	5.738	4.58271	4.63451	4.39083	4.3357	3.73941
Glyma.01G024300	Glyma01g02990	Exocyst complex component	G7JZR6_MEDTR	9e-32	-	-	-	-	-	-	-	-	-	6.44032	3.59514	3.84074	0.0555561	NA	NA	NA	NA	NA
Glyma.01G024500	Glyma01g03005	WRKY transcription factor	G7IXC7_MEDTR	8e-38	-	-	-	-	-	-	-	-	-	8.21099	5.05939	4.26915	2.97811	5.21047	5.79366	5.42781	5.60834	5.20463
Glyma.01G025100	Glyma01g03070	-	-	-	-	-	-	-	-	-	-	-	-	9.53276	6.91684	6.73533	4.59333	5.24958	5.77267	5.32472	5.1932	5.06358
Glyma.01G025200	Glyma01g03090	MATE efflux family protein	V7CN94_PHAVU	0	AT5G65380.1	0	MATE efflux family protein	GO:0006855 GO:0009835 GO:0055085	drug transmembrane transport; "fruit ripening"; "transmembrane transport"	GO:0005215 GO:0015238 GO:0015297	antiporter activity; "drug transmembrane transporter activity"; "transporter activity"	GO:0005886 GO:0016020	membrane; "plasma membrane"	3.44464	1.72005	1.61875	NA	NA	NA	NA	NA	NA
Glyma.01G025500	Glyma01g03120	1-aminocyclopropane-1-carboxylate oxidase	G7JXT3_MEDTR	0	AT4G10500.1	1e-85	2-oxoglutarate (2OG) and Fe(II)-dependent oxygenase superfamily protein	GO:0009627 GO:0009697 GO:0019748 GO:0055114	oxidation-reduction process; "salicylic acid biosynthetic process"; "secondary metabolic process"; "systemic acquired resistance"	GO:0016491 GO:0016706	oxidoreductase activity; "oxidoreductase activity, acting on paired donors, with incorporation or reduction of molecular oxygen, 2-oxoglutarate as one donor, and incorporation of one atom each of oxygen into both donors"	-	-	5.90355	3.97753	3.81512	1.88928	3.42599	4.73376	4.9348	4.76837	4.64043
Glyma.01G025700	Glyma01g03140	-	-	-	-	-	-	-	-	-	-	-	-	3.34615	4.64205	4.94304	4.81301	2.29243	2.28945	3.02857	3.09486	3.57784
Glyma.01G026000	Glyma01g03160	ABC transporter B family member	G7JYX3_MEDTR	0	AT1G70610.1	0	transporter associated with antigen processing protein 1	GO:0000302 GO:0006810 GO:0010039 GO:0015996 GO:0055072 GO:0055085	chlorophyll catabolic process; "iron ion homeostasis"; "response to iron ion"; "response to reactive oxygen species"; "transmembrane transport"; "transport"	GO:0000166 GO:0005215 GO:0005524 GO:0016887 GO:0017111 GO:0042626	ATP binding; "ATPase activity"; "ATPase activity, coupled to transmembrane movement of substances"; "nucleoside-triphosphatase activity"; "nucleotide binding"; "transporter activity"	GO:0009507 GO:0009941 GO:0016021	chloroplast; "chloroplast envelope"; "integral to membrane"	7.97194	7.75119	7.61252	6.84655	5.47182	6.13077	5.46639	5.16575	5.21075
Glyma.01G026200	Glyma01g03190	MATE efflux family protein	K7K1F1_SOYBN	0	AT3G26590.1	0	MATE efflux family protein	GO:0006855 GO:0055085	drug transmembrane transport; "transmembrane transport"	GO:0005215 GO:0015238 GO:0015297	antiporter activity; "drug transmembrane transporter activity"; "transporter activity"	GO:0005773 GO:0005774 GO:0005886 GO:0016020	membrane; "plasma membrane"; "vacuolar membrane"; "vacuole"	2.85296	2.24987	1.83135	1.06292	NA	-0.986998	-0.891919	-0.91204	0.618643
Glyma.01G026600	Glyma01g03240	-	-	-	AT5G40460.1	5e-26	unknown protein; BEST Arabidopsis thaliana protein match is: unknown protein (TAIR:AT3G27630.1); Has 87 Blast hits to 87 proteins in 12 species: Archae - 0; Bacteria - 0; Metazoa - 0; Fungi - 0; Plants - 87; Viruses - 0; Other Eukaryotes - 0 (source: NCBI BLink).	GO:0008150 GO:0009694 GO:0009753	biological process; "jasmonic acid metabolic process"; "response to jasmonic acid stimulus"	GO:0005515	protein binding	GO:0005575	cellular component	2.12509	3.60187	3.68786	2.54349	NA	-0.00299611	0.632741	0.608358	-0.0798389
Glyma.01G026700	Glyma01g03260	Alanine aminotransferase 3	A8IKE9_SOYBN	0	AT1G70580.4	0	alanine-2-oxoglutarate aminotransferase 2	GO:0009058 GO:0009853 GO:0010264 GO:0042218	1-aminocyclopropane-1-carboxylate biosynthetic process; "biosynthetic process"; "myo-inositol hexakisphosphate biosynthetic process"; "photorespiration"	GO:0003824 GO:0004021 GO:0008453 GO:0016740 GO:0016847 GO:0030170 GO:0047958	1-aminocyclopropane-1-carboxylate synthase activity; "L-alanine:2-oxoglutarate aminotransferase activity"; "alanine-glyoxylate transami-se activity"; "catalytic activity"; "glycine:2-oxoglutarate aminotransferase activity"; "pyridoxal phosphate binding"; "transferase activity"	GO:0005737 GO:0005777 GO:0009507 GO:0009570	chloroplast; "chloroplast stroma"; "cytoplasm"; "peroxisome"	9.25712	7.85142	7.58136	6.47384	6.03541	6.23844	6.15775	5.88235	5.70067
Glyma.01G027500	Glyma01g03360	Lipase	G7K048_MEDTR	0	AT1G10740.4	0	alpha/beta-Hydrolases superfamily protein	GO:0006114	glycerol biosynthetic process	-	-	GO:0005576	extracellular region	6.9286	5.48862	5.44625	3.80408	0.503705	0.00114721	-1.10717	-1.08887	-0.927841
Glyma.01G027600	Glyma01g03371	TLD family protein	T1QFU2_ELAGV	1e-58	AT4G39870.2	2e-52	TLD-domain containing nucleolar protein	GO:0008150	biological process	GO:0003674	molecular function	GO:0005739	mitochondrion	4.33218	2.31168	2.45572	-1.52331	-1.35736	-1.01334	NA	NA	0.0814936
Glyma.01G027800	Glyma01g03390	Carboxyl-terminal proteinase-like protein	G7K053_MEDTR	0	AT1G70550.2	0	Protein of Unknown Function (DUF239)	GO:0008150 GO:0009736 GO:0010413 GO:0045492	biological process; "cytokinin mediated sig-ling pathway"; "glucuronoxylan metabolic process"; "xylan biosynthetic process"	-	-	GO:0005576 GO:0005739	extracellular region; "mitochondrion"	4.49992	3.4519	3.17544	2.15039	0.617159	1.35684	0.54722	0.563364	0.00225974
Glyma.01G028000	Glyma01g03410	Cysteine-rich receptor-like protein kinase 3	CRK3_ARATH	4e-115	AT1G70530.1	4e-118	cysteine-rich RLK (RECEPTOR-like protein kinase) 3	GO:0006468 GO:0009627 GO:0031347	protein phosphorylation; "regulation of defense response"; "systemic acquired resistance"	GO:0004672 GO:0004674 GO:0005524 GO:0016301 GO:0016772	ATP binding; "ki-se activity"; "protein ki-se activity"; "protein serine/threonine ki-se activity"; "transferase activity, transferring phosphorus-containing groups"	GO:0005576 GO:0005886	extracellular region; "plasma membrane"	5.62633	3.24163	3.85362	0.0555561	NA	NA	NA	NA	NA
Glyma.01G028200	Glyma01g03430	Menaquinone biosynthesis methyltransferase ubiE	G7K058_MEDTR	3e-141	AT1G23360.1	3e-117	S-adenosyl-L-methionine-dependent methyltransferases superfamily protein	GO:0042372	phylloquinone biosynthetic process	GO:0008168 GO:0052624	2-phytyl-1,4--phthoquinone methyltransferase activity; "methyltransferase activity"	GO:0005739 GO:0009507	chloroplast; "mitochondrion"	6.1797	5.67826	5.471	4.58926	3.34825	3.64846	3.55231	3.50997	3.59504
Glyma.01G028500	Glyma01g03470	Early nodulin-36A	NO36A_SOYBN	3e-58	-	-	-	-	-	-	-	-	-	5.12704	3.41014	3.81302	1.80097	NA	-0.986998	0.54722	0.563364	0.00225974
Glyma.01G028600	Glyma01g03480	Protein trichome birefringence-like 2	TBL2_ARATH	0	AT1G60790.1	0	Plant protein of unknown function (DUF828)	GO:0008150	biological process	-	-	-	-	6.81901	6.70827	6.73709	5.25819	1.39652	2.60893	2.75543	2.80946	1.96958
Glyma.01G028700	Glyma01g03490	Leucine-rich repeat receptor-like kinase	E2IXG6_MEDTR	0	AT1G60800.1	0	NSP-interacting kinase 3	GO:0006468 GO:0007020 GO:0010075 GO:0048653	anther development; "microtubule nucleation"; "protein phosphorylation"; "regulation of meristem growth"	GO:0004672 GO:0004674 GO:0005524 GO:0016301 GO:0016772	ATP binding; "ki-se activity"; "protein ki-se activity"; "protein serine/threonine ki-se activity"; "transferase activity, transferring phosphorus-containing groups"	GO:0005576 GO:0005886	extracellular region; "plasma membrane"	9.62517	7.37479	7.03544	5.19313	3.53286	3.86118	3.78456	3.73911	3.23728
Glyma.01G028800	Glyma01g03500	F-box/kelch-repeat protein	G7JXX3_MEDTR	4e-171	AT1G23390.1	7e-84	Kelch repeat-containing F-box family protein	GO:0008150	biological process	GO:0003674	molecular function	GO:0005634	nucleus	5.12015	5.13018	5.04409	6.2593	6.68202	7.63051	8.08967	8.01151	8.04813
Glyma.01G028900	Glyma01g03530	ATP citrate lyase b-subunit	Q93YH3_LUPAL	0	AT1G10670.4	0	ATP-citrate lyase A-1	GO:0000271 GO:0006084 GO:0006085 GO:0006633 GO:0007568 GO:0009825 GO:0009911 GO:0009932 GO:0010025 GO:0010817 GO:0015995 GO:0016117 GO:0019252 GO:0019344 GO:0030244 GO:0043481 GO:0045793 GO:0045995 GO:0048193 GO:0048366 GO:0048767 GO:0071555	Golgi vesicle transport; "acetyl-CoA biosynthetic process"; "acetyl-CoA metabolic process"; "aging"; "anthocyanin accumulation in tissues in response to UV light"; "carotenoid biosynthetic process"; "cell tip growth"; "cell wall organization"; "cellulose biosynthetic process"; "chlorophyll biosynthetic process"; "cysteine biosynthetic process"; "fatty acid biosynthetic process"; "leaf development…	GO:0003878 GO:0005524 GO:0016874	ATP binding; "ATP citrate synthase activity"; "ligase activity"	GO:0005737 GO:0005829 GO:0009346	citrate lyase complex; "cytoplasm"; "cytosol"	8.79637	7.57732	7.15086	6.3489	4.98199	5.63201	5.29634	5.21132	4.94567
Glyma.01G030500	Glyma01g03720	Carbonic anhydrase	I1J593_SOYBN	0	AT5G14740.2	8e-133	carbonic anhydrase 2	GO:0000165 GO:0006612 GO:0009409 GO:0009595 GO:0009697 GO:0009814 GO:0009862 GO:0009867 GO:0010200 GO:0010310 GO:0010363 GO:0015976 GO:0019243 GO:0019684 GO:0031348 GO:0042742 GO:0043900 GO:0050832	MAPK cascade; "carbon utilization"; "defense response, incompatible interaction"; "defense response to bacterium"; "defense response to fungus"; "detection of biotic stimulus"; "jasmonic acid mediated sig-ling pathway"; "methylglyoxal catabolic process to D-lactate"; "negative regulation of defense response"; "photosynthesis, light reaction"; "protein targeting to membrane"; "regulation of hydrog…	GO:0004089 GO:0008270	carbo-te dehydratase activity; "zinc ion binding"	GO:0005737 GO:0005829 GO:0009507 GO:0009535 GO:0009570 GO:0009941 GO:0048046	apoplast; "chloroplast"; "chloroplast envelope"; "chloroplast stroma"; "chloroplast thylakoid membrane"; "cytoplasm"; "cytosol"	6.59537	4.70488	4.66082	3.63766	1.1166	1.8184	1.35783	1.33157	1.58888
Glyma.01G030700	#N/A	-	-	-	-	-	-	-	-	-	-	-	-	3.10263	2.63151	2.80912	2.3276	1.70276	2.07669	0.0047454	0.00190919	0.00225974
Glyma.01G030900	Glyma01g03760	Polygalacturonase-1 non-catalytic subunit beta	G7K1D9_MEDTR	0	AT1G70370.2	0	polygalacturonase 2	GO:0000271 GO:0000272 GO:0005982 GO:0007389 GO:0008150 GO:0008361 GO:0009664 GO:0009825 GO:0009832 GO:0009926 GO:0009932 GO:0010015 GO:0010075 GO:0010817 GO:0040007 GO:0043481 GO:0048653 GO:0048767 GO:0071555	anther development; "anthocyanin accumulation in tissues in response to UV light"; "auxin polar transport"; "biological process"; "cell tip growth"; "cell wall organization"; "growth"; "multidimensio-l cell growth"; "pattern specification process"; "plant-type cell wall biogenesis"; "plant-type cell wall organization"; "polysaccharide biosynthetic process"; "polysaccharide catabolic process"; "re…	GO:0004650	polygalacturo-se activity	GO:0005576	extracellular region	7.90044	5.61234	5.14919	3.60468	3.912	4.37505	4.03292	4.04467	3.37853
Glyma.01G032000	Glyma01g03880	NHL repeat-containing family protein	B9HJT0_POPTR	0	AT1G70280.2	0	NHL domain-containing protein	GO:0000394 GO:0008150 GO:0009086	R- splicing, via endonucleolytic cleavage and ligation; "biological process"; "methionine biosynthetic process"	GO:0003674	molecular function	GO:0005576 GO:0005634	extracellular region; "nucleus"	4.66598	3.4255	2.86287	2.04434	0.617159	2.15212	1.88461	1.81945	1.96958
Glyma.01G032200	Glyma01g03900	RING finger protein	G7K1H8_MEDTR	1e-162	AT5G40250.1	2e-114	RING/U-box superfamily protein	-	-	GO:0008270	zinc ion binding	GO:0005634	nucleus	5.87359	3.4855	3.44449	1.06292	-1.35736	-0.000621929	-0.891919	-0.91204	-1.07126
Glyma.01G032300	Glyma01g03910	NBS/LRR resistance protein-like protein	G7J2A2_MEDTR	1e-17	-	-	-	-	-	-	-	-	-	7.02541	5.77143	5.60936	4.93234	3.5873	4.15288	4.74867	4.75322	4.19935
Glyma.01G032700	#N/A	-	-	-	-	-	-	-	-	-	-	-	-	1.44489	2.18698	2.9529	1.61804	-0.362116	1.94151	2.78727	2.806	2.12536
Glyma.01G033400	#N/A	-	-	-	-	-	-	-	-	-	-	-	-	4.839	3.8619	3.31884	3.38437	-1.35736	0.97597	1.35783	1.33157	1.58888
Glyma.01G033700	Glyma01g04040	Auxin-induced protein 5NG4	G7K2R8_MEDTR	3e-124	AT5G40210.1	1e-74	nodulin MtN21 /EamA-like transporter family protein	GO:0006863	purine nucleobase transport	-	-	GO:0016020	membrane	3.96855	1.95316	1.85378	NA	NA	NA	NA	NA	NA
Glyma.01G033900	Glyma01g04060	Auxin-induced protein 5NG4	G7K2S7_MEDTR	7e-157	AT5G40240.1	4e-73	nodulin MtN21 /EamA-like transporter family protein	-	-	GO:0003674	molecular function	GO:0016020	membrane	6.16083	4.00423	3.90696	1.42834	NA	NA	NA	NA	NA
Glyma.01G034000	Glyma01g04070	MLP-like protein	B7FKA0_MEDTR	6e-74	AT1G24020.2	6e-60	MLP-like protein 423	GO:0006952 GO:0016556	defense response; "mR- modification"	-	-	GO:0009507 GO:0016020	chloroplast; "membrane"	5.32384	5.63591	5.09652	4.87172	1.49911	1.35684	2.43022	2.57845	2.95836
Glyma.01G034100	Glyma01g04080	Protein kinase family protein	G7K2T1_MEDTR	0	AT1G24030.2	0	Protein kinase superfamily protein	GO:0006468 GO:0010228 GO:0010413 GO:0016926 GO:0042546 GO:0044036 GO:0045492 GO:0050665	cell wall biogenesis; "cell wall macromolecule metabolic process"; "glucuronoxylan metabolic process"; "hydrogen peroxide biosynthetic process"; "protein desumoylation"; "protein phosphorylation"; "vegetative to reproductive phase transition of meristem"; "xylan biosynthetic process"	GO:0004672 GO:0004674 GO:0004713 GO:0005524 GO:0016301 GO:0016772	ATP binding; "ki-se activity"; "protein ki-se activity"; "protein serine/threonine ki-se activity"; "protein tyrosine ki-se activity"; "transferase activity, transferring phosphorus-containing groups"	GO:0005886	plasma membrane	1.19771	0.49305	0.372821	NA	-1.35736	-1.01334	NA	NA	NA
Glyma.01G034700	Glyma01g04130	Protein ALTERED XYLOGLUCAN 4	TBL27_ARATH	6e-119	AT1G70230.1	7e-122	TRICHOME BIREFRINGENCE-LIKE 27	GO:0010167 GO:0010411 GO:0015706	nitrate transport; "response to nitrate"; "xyloglucan metabolic process"	-	-	GO:0005634 GO:0005794	Golgi apparatus; "nucleus"	2.73328	5.66475	5.55103	3.74583	0.760157	2.07389	2.3118	2.18306	2.06333
Glyma.01G034900	Glyma01g04151	Protein ALTERED XYLOGLUCAN 4	TBL27_ARATH	1e-147	AT1G70230.1	1e-150	TRICHOME BIREFRINGENCE-LIKE 27	GO:0010167 GO:0010411 GO:0015706	nitrate transport; "response to nitrate"; "xyloglucan metabolic process"	-	-	GO:0005634 GO:0005794	Golgi apparatus; "nucleus"	8.80318	5.29702	5.4705	1.59056	1.39652	2.23596	1.92155	1.98553	1.00311
Glyma.01G035100	Glyma01g04170	Sterol 4-alpha-methyl-oxidase	G7K2U6_MEDTR	0	AT1G07420.1	2e-168	sterol 4-alpha-methyl-oxidase 2-1	GO:0006333 GO:0006633 GO:0016126 GO:0046520 GO:0055114	chromatin assembly or disassembly; "fatty acid biosynthetic process"; "oxidation-reduction process"; "sphingoid biosynthetic process"; "sterol biosynthetic process"	GO:0000254 GO:0005506 GO:0016491 GO:0080065	4-alpha-methyl-delta7-sterol-4alpha-methyl oxidase activity; "C-4 methylsterol oxidase activity"; "iron ion binding"; "oxidoreductase activity"	GO:0009941	chloroplast envelope	10.0194	7.55981	7.55152	5.24105	1.24486	0.97597	1.59224	1.58434	1.30282
Glyma.01G035300	Glyma01g04190	T10O24.15	Q9XIJ9_ARATH	1e-45	AT1G60010.1	8e-58	unknown protein; FUNCTIONS IN: molecular_function unknown; INVOLVED IN: N-terminal protein myristoylation; LOCATED IN: cellular_component unknown; EXPRESSED IN: 22 plant structures; EXPRESSED DURING: 13 growth stages; BEST Arabidopsis thaliana protein match is: unknown protein (TAIR:AT1G10530.1); Has 185 Blast hits to 185 proteins in 18 species: Archae - 0; Bacteria - 0; Metazoa - 0; Fungi - 3; P…	GO:0006499 GO:0006833 GO:0009651 GO:0009750	N-termi-l protein myristoylation; "response to fructose stimulus"; "response to salt stress"; "water transport"	GO:0003674	molecular function	GO:0005634	nucleus	3.64153	6.10872	5.88224	4.79473	2.49022	2.62528	3.24857	3.24362	3.08271
Glyma.01G035400	Glyma01g04200	CC-NBS-LRR disease resistance protein	V5UN18_CICAR	0	AT3G14470.1	5e-115	NB-ARC domain-containing disease resistance protein	GO:0006952 GO:0009627 GO:0009697	defense response; "salicylic acid biosynthetic process"; "systemic acquired resistance"	GO:0005515 GO:0043531	ADP binding; "protein binding"	GO:0005576	extracellular region	2.78592	1.62349	1.83135	-1.52331	-0.639723	NA	NA	NA	NA
Glyma.01G035500	Glyma01g04210	-	-	-	-	-	-	-	-	-	-	-	-	2.20805	1.33317	0.939277	0.0969565	-0.362116	0.00114721	-1.10717	-1.08887	NA
Glyma.01G035600	Glyma01g04220	Cyclin-D1-1	G7K443_MEDTR	9e-166	AT1G70210.1	8e-131	CYCLIN D1;1	GO:0000278 GO:0010440 GO:0042023 GO:0045736 GO:0051726	D- endoreduplication; "mitotic cell cycle"; "negative regulation of cyclin-dependent protein serine/threonine ki-se activity"; "regulation of cell cycle"; "stomatal lineage progression"	GO:0005515 GO:0016538	cyclin-dependent protein serine/threonine ki-se regulator activity; "protein binding"	GO:0005634	nucleus	5.01649	3.5558	3.26491	2.04434	1.34225	2.98611	3.12668	2.97622	3.10458
Glyma.01G035800	Glyma01g04241	Resistance protein	G7K2V7_MEDTR	0	AT3G14470.1	8e-81	NB-ARC domain-containing disease resistance protein	GO:0006952 GO:0009627 GO:0009697	defense response; "salicylic acid biosynthetic process"; "systemic acquired resistance"	GO:0005515 GO:0043531	ADP binding; "protein binding"	GO:0005576	extracellular region	0.850753	0.532757	0.498864	-1.52331	-1.35736	-1.01334	NA	NA	NA
Glyma.01G036800	Glyma01g04340	WD repeat-containing protein-like protein	G7K5I2_MEDTR	9e-177	AT1G24130.1	3e-136	Transducin/WD40 repeat-like superfamily protein	GO:0008150	biological process	GO:0000166	nucleotide binding	GO:0005737 GO:0005834	cytoplasm; "heterotrimeric G-protein complex"	5.97138	5.82841	5.92001	5.42026	0.0476376	0.574819	1.29906	1.31204	-0.0798389
Glyma.01G036900	Glyma01g04350	Matrix metalloproteinase MMP2	Q93Z89_SOYBN	0	AT1G59970.1	2e-37	Matrixin family protein	GO:0006508 GO:0008152	metabolic process; "proteolysis"	GO:0004222 GO:0008237 GO:0008270	metalloendopeptidase activity; "metallopeptidase activity"; "zinc ion binding"	GO:0005576 GO:0005886 GO:0031012 GO:0031225	anchored to membrane; "extracellular matrix"; "extracellular region"; "plasma membrane"	5.98022	5.57631	4.52559	4.21711	0.503705	0.998455	1.53995	1.57063	0.55635
Glyma.01G037900	Glyma01g04460	Glycosyltransferase CAZy family GT8	G7K5M7_MEDTR	0	AT1G70090.2	0	glucosyl transferase family 8	GO:0016051	carbohydrate biosynthetic process	GO:0016757 GO:0016758 GO:0047262	polygalacturo-te 4-alpha-galacturonosyltransferase activity; "transferase activity, transferring glycosyl groups"; "transferase activity, transferring hexosyl groups"	GO:0005794	Golgi apparatus	8.6466	6.71811	6.67385	5.34745	5.10173	5.81374	6.14083	6.23707	6.05446
Glyma.01G038000	Glyma01g04468	Pyruvate dehydrogenase E1 component subunit alpha, mitochondrial	ODPA_PEA	0	AT1G59900.1	0	pyruvate dehydrogenase complex E1 alpha subunit	GO:0006096 GO:0008152 GO:0046686 GO:0055114	glycolysis; "metabolic process"; "oxidation-reduction process"; "response to cadmium ion"	GO:0004739 GO:0016624	oxidoreductase activity, acting on the aldehyde or oxo group of donors, disulfide as acceptor; "pyruvate dehydroge-se (acetyl-transferring) activity"	GO:0005634 GO:0005739 GO:0005829 GO:0043231	cytosol; "intracellular membrane-bounded organelle"; "mitochondrion"; "nucleus"	3.24602	2.55902	1.7729	1.275	0.212256	1.02081	0.0047454	0.00190919	1.05405
Glyma.01G038400	Glyma01g04500	Microtubule-associated protein TORTIFOLIA1	G7K6Y7_MEDTR	0	AT1G27210.1	3e-175	ARM repeat superfamily protein	-	-	-	-	GO:0009507	chloroplast	8.52677	8.47	8.78414	7.50431	5.14608	5.8061	6.47466	6.01629	5.96458
Glyma.01G039200	Glyma01g04610	Transcription factor bHLH79	G7LEL6_MEDTR	1e-101	AT1G59640.1	1e-89	BIG PETAL P	GO:0006355 GO:0009062 GO:0009694 GO:0009753 GO:0009827 GO:0009860 GO:0010162 GO:0048441 GO:0048443 GO:0048446 GO:0048481	fatty acid catabolic process; "jasmonic acid metabolic process"; "ovule development"; "petal development"; "petal morphogenesis"; "plant-type cell wall modification"; "pollen tube growth"; "regulation of transcription, D--dependent"; "response to jasmonic acid stimulus"; "seed dormancy process"; "stamen development"	GO:0003677 GO:0003700	D- binding; "sequence-specific D- binding transcription factor activity"	GO:0005634	nucleus	5.39681	2.97544	3.07159	-0.52691	1.0549	0.592839	0.54722	0.563364	0.00225974
Glyma.01G039600	Glyma01g04640	Receptor-kinase like protein	C6ZS05_SOYBN	0	AT5G23400.1	6e-94	Leucine-rich repeat (LRR) family protein	GO:0006952 GO:0007165	defense response; "sig-l transduction"	-	-	GO:0005618 GO:0005886 GO:0009506	cell wall; "plasma membrane"; "plasmodesma"	2.54728	1.74624	1.43083	-0.52691	-1.35736	-1.01334	NA	NA	NA
Glyma.01G039900	Glyma01g04670	Wall-associated receptor kinase-like protein	G7K8A0_MEDTR	1e-176	AT1G10380.1	4e-102	Putative membrane lipoprotein	GO:0008150	biological process	GO:0003674	molecular function	GO:0005576	extracellular region	4.56809	3.83848	3.88656	2.74747	5.04116	6.15089	5.99705	6.05395	5.71448
Glyma.01G040000	Glyma01g04690	Glutathione S-transferase GST 5	Q9FQF3_SOYBN	5e-122	AT1G10360.1	3e-83	glutathione S-transferase TAU 18	GO:0006098 GO:0009407 GO:0010304 GO:0010583	PSII associated light-harvesting complex II catabolic process; "pentose-phosphate shunt"; "response to cyclopentenone"; "toxin catabolic process"	GO:0004364	glutathione transferase activity	GO:0005737	cytoplasm	6.73705	5.47172	4.79018	3.63119	-0.362116	1.30728	1.59224	1.58434	1.30282
Glyma.01G040200	Glyma01g04710	Glutathione S-transferase GST 5	Q9FQF3_SOYBN	2e-168	AT1G10360.1	2e-86	glutathione S-transferase TAU 18	GO:0006098 GO:0009407 GO:0010304 GO:0010583	PSII associated light-harvesting complex II catabolic process; "pentose-phosphate shunt"; "response to cyclopentenone"; "toxin catabolic process"	GO:0004364	glutathione transferase activity	GO:0005737	cytoplasm	6.59841	3.50574	3.27669	-0.52691	NA	NA	NA	NA	-0.927841
Glyma.01G040500	Glyma01g04740	Small multi-drug export protein	G7K8C6_MEDTR	2e-116	AT2G02590.1	1e-104	FUNCTIONS IN: molecular_function unknown; INVOLVED IN: biological_process unknown; LOCATED IN: chloroplast; EXPRESSED IN: 21 plant structures; EXPRESSED DURING: 13 growth stages; CONTAINS InterPro DOMAIN/s: Putative small multi-drug export (InterPro:IPR009577); Has 405 Blast hits to 405 proteins in 185 species: Archae - 65; Bacteria - 295; Metazoa - 0; Fungi - 0; Plants - 23; Viruses - 0; Other E…	GO:0008150	biological process	GO:0003674	molecular function	GO:0009507	chloroplast	5.46239	3.00327	2.57845	-0.52691	0.212256	2.12397	2.59569	2.58089	2.12536
Glyma.01G040600	Glyma01g04750	DnaJ homolog subfamily B member	G7K8E9_MEDTR	4e-118	AT1G59725.1	4e-108	DNAJ heat shock family protein	GO:0006457	protein folding	GO:0031072 GO:0051082	heat shock protein binding; "unfolded protein binding"	GO:0005737	cytoplasm	5.94344	3.99336	3.90786	1.88928	2.57702	2.66456	2.37938	2.45577	0.951408
Glyma.01G041400	Glyma01g04830	Peptide transporter PTR1	G7K9P5_MEDTR	0	AT1G69870.1	0	nitrate transporter 1.7	GO:0006857 GO:0015706 GO:0019761 GO:0080055	glucosinolate biosynthetic process; "low affinity nitrate transport"; "nitrate transport"; "oligopeptide transport"	GO:0005215 GO:0080054	low affinity nitrate transmembrane transporter activity; "transporter activity"	GO:0005886 GO:0016020	membrane; "plasma membrane"	10.882	9.4067	9.13639	7.81592	5.19735	5.05261	5.12694	5.22429	5.73009
Glyma.01G042800	Glyma01g04980	BZIP transcription factor bZIP109	Q0GPG4_SOYBN	0	AT1G27000.1	2e-94	Protein of unknown function (DUF1664)	GO:0006355	regulation of transcription, D--dependent	GO:0003677	D- binding	-	-	9.0505	10.4099	10.3143	11.255	11.5012	11.9563	12.1633	12.2176	12.059
Glyma.01G042900	Glyma01g04991	Zinc ion binding protein	D7MCZ5_ARALL	6e-149	AT4G35540.1	7e-145	zinc ion binding;transcription regulators	GO:0009793 GO:0009846 GO:0010440	embryo development ending in seed dormancy; "pollen germi-tion"; "stomatal lineage progression"	GO:0001093 GO:0003690 GO:0070063	R- polymerase binding; "TFIIB-class transcription factor binding"; "double-stranded D- binding"	GO:0005634	nucleus	6.05912	5.65342	5.61352	5.42085	2.81593	3.42505	3.84865	3.78666	3.73404
Glyma.01G043100	Glyma01g05020	Rsmv23 protein	G3ECQ9_SOYBN	6e-142	AT4G36950.1	1e-102	mitogen-activated protein kinase kinase kinase 21	GO:0006468	protein phosphorylation	GO:0004672 GO:0004674 GO:0005524 GO:0016772	ATP binding; "protein ki-se activity"; "protein serine/threonine ki-se activity"; "transferase activity, transferring phosphorus-containing groups"	GO:0005886	plasma membrane	1.09031	0.956444	1.35554	-0.52691	NA	NA	-1.10717	-1.08887	0.675164
Glyma.01G043600	Glyma01g05080	Ubiquitin-conjugating enzyme E2-17 kDa family protein	A9PBR0_POPTR	5e-104	AT1G14400.2	2e-105	ubiquitin carrier protein 1	GO:0006301 GO:0006511 GO:0006605 GO:0006623 GO:0006661 GO:0006944 GO:0009910 GO:0009965 GO:0010228 GO:0016197 GO:0033523	cellular membrane fusion; "endosomal transport"; "histone H2B ubiquiti-tion"; "leaf morphogenesis"; "negative regulation of flower development"; "phosphatidylinositol biosynthetic process"; "postreplication repair"; "protein targeting"; "protein targeting to vacuole"; "ubiquitin-dependent protein catabolic process"; "vegetative to reproductive phase transition of meristem"	GO:0004842 GO:0016881	acid-amino acid ligase activity; "ubiquitin-protein ligase activity"	GO:0005634	nucleus	7.19336	6.53315	6.81315	5.62621	3.4934	3.63056	4.41631	4.37498	4.12636
Glyma.01G044000	Glyma01g05150	SOUL heme-binding family protein	B9GGX3_POPTR	7e-103	AT1G17100.1	3e-95	SOUL heme-binding family protein	GO:0008150 GO:0019761	biological process; "glucosinolate biosynthetic process"	-	-	GO:0005773 GO:0005774 GO:0009507	chloroplast; "vacuolar membrane"; "vacuole"	8.43412	6.03084	5.8562	4.66992	2.89925	3.58923	4.37609	4.23629	3.93237
Glyma.01G044600	Glyma01g05230	HD domain class transcription factor	D9ZJ08_MALDO	9e-157	AT1G69780.1	3e-122	Homeobox-leucine zipper protein family	GO:0006355 GO:0009744 GO:0009965 GO:0048826	cotyledon morphogenesis; "leaf morphogenesis"; "regulation of transcription, D--dependent"; "response to sucrose stimulus"	GO:0000976 GO:0003677 GO:0003700 GO:0043565	D- binding; "sequence-specific D- binding"; "sequence-specific D- binding transcription factor activity"; "transcription regulatory region sequence-specific D- binding"	GO:0005634	nucleus	4.07192	2.75455	2.19347	0.46158	NA	NA	NA	NA	NA
Glyma.01G044800	Glyma01g05310	Transcription factor bHLH135	G7KCF8_MEDTR	2e-41	AT1G26945.1	5e-39	basic helix-loop-helix (bHLH) DNA-binding superfamily protein	GO:0009416	response to light stimulus	-	-	GO:0005634	nucleus	3.44464	1.72005	1.61875	NA	NA	NA	NA	NA	NA
Glyma.01G044900	Glyma01g05321	Peptidyl-prolyl cis-trans isomerase-like protein	B7FMU5_MEDTR	9e-88	AT1G26940.1	3e-87	Cyclophilin-like peptidyl-prolyl cis-trans isomerase family protein	GO:0006457	protein folding	GO:0003755	peptidyl-prolyl cis-trans isomerase activity	GO:0005576 GO:0005768 GO:0005794 GO:0005802	Golgi apparatus; "endosome"; "extracellular region"; "trans-Golgi network"	4.78005	4.28456	3.65345	3.57115	3.23955	3.12867	1.96491	1.99239	1.83039
Glyma.01G045400	Glyma01g05370	HVA22-like protein c	G7KCI8_MEDTR	5e-116	AT1G69700.1	4e-78	HVA22 homologue C	GO:0009414 GO:0009737 GO:0042538	hyperosmotic salinity response; "response to abscisic acid stimulus"; "response to water deprivation"	GO:0003674	molecular function	GO:0005634 GO:0009506	nucleus; "plasmodesma"	3.61403	2.00293	1.70519	-1.52331	-1.35736	-1.01334	NA	NA	NA
Glyma.01G045500	Glyma01g05410	TCP family transcription factor-like protein	G7KCJ2_MEDTR	4e-157	AT3G47620.1	1e-53	TEOSINTE BRANCHED, cycloidea and PCF (TCP) 14	GO:0006355 GO:0008283 GO:0009735 GO:0009737 GO:0009739 GO:0010029 GO:0010229 GO:0031347	cell proliferation; "inflorescence development"; "regulation of defense response"; "regulation of seed germi-tion"; "regulation of transcription, D--dependent"; "response to abscisic acid stimulus"; "response to cytokinin stimulus"; "response to gibberellin stimulus"	GO:0003700 GO:0005515	protein binding; "sequence-specific D- binding transcription factor activity"	GO:0005634	nucleus	4.41448	3.50387	3.84644	1.73508	NA	NA	NA	NA	NA
Glyma.01G045800	Glyma01g05440	Peroxisomal adenine nucleotide carrier 1	PNC1_SOYBN	0	AT3G05290.1	3e-169	peroxisomal adenine nucleotide carrier 1	GO:0006635 GO:0006810 GO:0006839 GO:0007031 GO:0009407 GO:0015866 GO:0015867 GO:0043161 GO:0051788 GO:0080024 GO:0080129 GO:0090351	ADP transport; "ATP transport"; "fatty acid beta-oxidation"; "indolebutyric acid metabolic process"; "mitochondrial transport"; "peroxisome organization"; "proteasomal ubiquitin-dependent protein catabolic process"; "proteasome core complex assembly"; "response to misfolded protein"; "seedling development"; "toxin catabolic process"; "transport"	GO:0005347 GO:0015217	ADP transmembrane transporter activity; "ATP transmembrane transporter activity"	GO:0005739 GO:0005743 GO:0005777	mitochondrial inner membrane; "mitochondrion"; "peroxisome"	7.92749	8.39545	8.32862	7.64829	4.69043	4.81094	4.53571	4.74193	3.50743
Glyma.01G046000	Glyma01g05470	Fatty acid desaturase/cytochrome b5 fusion protein mRNA	B9GQE8_POPTR	0	AT2G46210.1	0	Fatty acid/sphingolipid desaturase	GO:0006629 GO:0006633 GO:0055114	fatty acid biosynthetic process; "lipid metabolic process"; "oxidation-reduction process"	GO:0005506 GO:0016491 GO:0016717 GO:0020037	heme binding; "iron ion binding"; "oxidoreductase activity"; "oxidoreductase activity, acting on paired donors, with oxidation of a pair of donors resulting in the reduction of molecular oxygen to two molecules of water"	-	-	7.61329	5.62265	5.84858	3.32743	NA	NA	NA	NA	0.0814936
Glyma.01G046200	Glyma01g05490	Haloacid dehalogenase-like hydrolase domain-containing protein	G7KDV9_MEDTR	2e-143	AT1G14310.1	5e-119	Haloacid dehalogenase-like hydrolase (HAD) superfamily protein	GO:0008152	metabolic process	GO:0003824 GO:0008967 GO:0016787	catalytic activity; "hydrolase activity"; "phosphoglycolate phosphatase activity"	GO:0005575	cellular component	8.34316	7.24469	7.23151	6.39515	4.87744	5.4881	6.06668	5.98471	5.75056
Glyma.01G046300	Glyma01g05500	Anthocyanin 3'-O-beta-glucosyltransferase	G7KDU4_MEDTR	0	AT2G15480.2	7e-117	UDP-glucosyl transferase 73B5	GO:0008152 GO:0009407 GO:0009723 GO:0010583 GO:0051707	metabolic process; "response to cyclopentenone"; "response to ethylene stimulus"; "response to other organism"; "toxin catabolic process"	GO:0008194 GO:0016757 GO:0016758 GO:0035251 GO:0080043	UDP-glucosyltransferase activity; "UDP-glycosyltransferase activity"; "quercetin 3-O-glucosyltransferase activity"; "transferase activity, transferring glycosyl groups"; "transferase activity, transferring hexosyl groups"	-	-	8.34005	7.69056	5.73639	1.14228	0.0476376	0.574819	0.632741	0.608358	-0.0798389
Glyma.01G046700	Glyma01g05580	Dehydration-responsive family protein	D7KPN7_ARALL	0	AT1G26850.2	0	S-adenosyl-L-methionine-dependent methyltransferases superfamily protein	-	-	GO:0008168	methyltransferase activity	GO:0005768 GO:0005794 GO:0005802 GO:0016020	Golgi apparatus; "endosome"; "membrane"; "trans-Golgi network"	6.59606	7.53596	7.25855	6.87766	4.72682	5.07831	5.34167	5.12069	5.23867
Glyma.01G047300	Glyma01g05765	Glycine-rich family protein	U5G0R0_POPTR	4e-92	AT1G27090.1	6e-88	glycine-rich protein	GO:0006007 GO:0008150	biological process; "glucose catabolic process"	GO:0003674	molecular function	GO:0005829 GO:0009507	chloroplast; "cytosol"	5.75556	8.35686	7.73821	8.40689	9.06248	9.64276	9.4906	9.33401	9.16024
Glyma.01G047800	Glyma01g05805	-	-	-	AT1G69588.1	3e-08	CLAVATA3/ESR-RELATED 45	-	-	-	-	-	-	2.30665	4.01628	3.27804	3.07852	0.376098	-0.986998	0.936542	0.970544	1.39164
Glyma.01G047900	Glyma01g05810	ZF-HD homeobox protein	Q9ARE0_FLATR	1e-55	AT5G15210.1	8e-52	homeobox protein 30	-	-	GO:0003677 GO:0003700 GO:0005515	D- binding; "protein binding"; "sequence-specific D- binding transcription factor activity"	GO:0005634	nucleus	8.11652	8.38718	8.38371	7.54951	5.95662	6.0304	5.60255	5.78561	5.5993
Glyma.01G048000	Glyma01g05820	-	-	-	AT5G39785.1	1e-100	Protein of unknown function (DUF1666)	GO:0006412	translation	GO:0003735	structural constituent of ribosome	GO:0005622 GO:0005634 GO:0005840	intracellular; "nucleus"; "ribosome"	6.99725	5.25233	5.26324	3.11329	-1.35736	-1.01334	-1.10717	-1.08887	-0.927841
Glyma.01G048100	Glyma01g05830	Pentatricopeptide repeat-containing protein	G7KF99_MEDTR	0	AT2G02980.1	0	Pentatricopeptide repeat (PPR) superfamily protein	GO:0016556 GO:0031425	chloroplast R- processing; "mR- modification"	-	-	GO:0005739 GO:0009507	chloroplast; "mitochondrion"	4.78911	5.49849	5.87091	6.10379	4.0447	3.69191	3.88164	3.91258	3.49957
Glyma.01G048600	Glyma01g05871	50S ribosomal protein L18	G7KFC6_MEDTR	7e-21	AT1G14205.1	2e-12	Ribosomal L18p/L5e family protein	GO:0006412	translation	GO:0003735	structural constituent of ribosome	GO:0005622 GO:0005840 GO:0009507	chloroplast; "intracellular"; "ribosome"	3.9478	4.56483	4.38258	4.34369	2.18832	2.44083	2.48761	2.45565	2.4501
Glyma.01G048700	Glyma01g05880	Zinc finger family protein	A9PB64_POPTR	4e-74	AT1G26800.1	1e-56	RING/U-box superfamily protein	-	-	GO:0008270	zinc ion binding	GO:0005634	nucleus	6.09785	7.07066	6.87878	6.6417	7.20704	8.71852	9.96072	10.1231	10.2228
Glyma.01G048800	Glyma01g05890	(R)-mandelonitrile lyase	G7KGL1_MEDTR	0	AT1G14190.1	5e-75	Glucose-methanol-choline (GMC) oxidoreductase family protein	GO:0006979 GO:0009408	response to heat; "response to oxidative stress"	-	-	GO:0005737	cytoplasm	6.45324	7.9661	7.6571	7.15216	9.42985	12.3006	13.3543	13.5407	13.5175
Glyma.01G049100	Glyma01g05920	Myb family transcription factor APL	G7KGL2_MEDTR	3e-152	AT1G69580.1	3e-79	Homeodomain-like superfamily protein	GO:0006355 GO:0009736	cytokinin mediated sig-ling pathway; "regulation of transcription, D--dependent"	GO:0003700	sequence-specific D- binding transcription factor activity	GO:0005634	nucleus	6.3061	4.68168	4.12626	2.89134	0.503705	0.592839	1.23988	1.29073	1.05405
Glyma.01G049400	Glyma01g05960	Ascorbate oxidase promoter-binding family protein	B9H0C1_POPTR	5e-133	AT3G47500.1	2e-79	cycling DOF factor 3	GO:0006355	regulation of transcription, D--dependent	GO:0003677 GO:0003700 GO:0005515 GO:0008270	D- binding; "protein binding"; "sequence-specific D- binding transcription factor activity"; "zinc ion binding"	GO:0005634	nucleus	2.26665	1.60759	1.27462	0.5	NA	NA	-1.10717	-1.08887	NA
Glyma.01G049700	#N/A	Glucan endo-1,3-beta-glucosidase	G7JJ89_MEDTR	6e-81	AT1G11820.1	7e-76	O-Glycosyl hydrolases family 17 protein	GO:0005975	carbohydrate metabolic process	GO:0003824 GO:0004553 GO:0043169	catalytic activity; "cation binding"; "hydrolase activity, hydrolyzing O-glycosyl compounds"	GO:0005576 GO:0005886	extracellular region; "plasma membrane"	7.10376	4.24201	4.02583	1.45771	2.49282	3.17717	2.56112	2.58265	2.48035
Glyma.01G050100	Glyma01g06030	Expansin A4	C6TN48_SOYBN	2e-180	AT1G69530.2	1e-151	expansin A1	GO:0006949 GO:0009664 GO:0009739 GO:0009826 GO:0009828 GO:0010114 GO:0010119	plant-type cell wall loosening; "plant-type cell wall organization"; "regulation of stomatal movement"; "response to gibberellin stimulus"; "response to red light"; "syncytium formation"; "unidimensio-l cell growth"	-	-	GO:0005576 GO:0009505	extracellular region; "plant-type cell wall"	7.994	5.06721	4.16946	1.98373	NA	NA	NA	NA	NA
Glyma.01G050900	Glyma01g06110	Oxygen-evolving enhancer protein 3-2	G7KGQ5_MEDTR	2e-91	AT1G14150.1	5e-64	PsbQ-like 2	GO:0006098 GO:0009767 GO:0015979	pentose-phosphate shunt; "photosynthesis"; "photosynthetic electron transport chain"	GO:0005509 GO:0045156	calcium ion binding; "electron transporter, transferring electrons within the cyclic electron transport pathway of photosynthesis activity"	GO:0009344 GO:0009507 GO:0009523 GO:0009534 GO:0009535 GO:0009543 GO:0009654 GO:0019898 GO:0030095	chloroplast; "chloroplast photosystem II"; "chloroplast thylakoid"; "chloroplast thylakoid lumen"; "chloroplast thylakoid membrane"; "extrinsic to membrane"; "nitrite reductase complex [-D(P)H]"; "oxygen evolving complex"; "photosystem II"	5.78893	8.60874	9.06131	7.36102	4.96557	2.60893	2.75543	2.80946	2.74882
Glyma.01G051000	Glyma01g06121	Anaphase-promoting complex subunit	G7JGA9_MEDTR	9e-31	AT2G04660.1	4e-16	anaphase-promoting complex/cyclosome 2	GO:0006511 GO:0007267 GO:0007276 GO:0009561 GO:0009616 GO:0010267 GO:0032875 GO:0035196 GO:0051302 GO:0051510	cell-cell sig-ling; "gamete generation"; "megagametogenesis"; "production of miR-s involved in gene silencing by miR-"; "production of ta-siR-s involved in R- interference"; "regulation of D- endoreduplication"; "regulation of cell division"; "regulation of unidimensio-l cell growth"; "ubiquitin-dependent protein catabolic process"; "virus induced gene silencing"	GO:0004842 GO:0005515 GO:0031625	protein binding; "ubiquitin-protein ligase activity"; "ubiquitin protein ligase binding"	GO:0000151 GO:0005634 GO:0005819 GO:0031461	cullin-RING ubiquitin ligase complex; "nucleus"; "spindle"; "ubiquitin ligase complex"	1.94394	3.87508	3.73412	3.57063	0.977188	NA	NA	NA	NA
Glyma.01G051300	Glyma01g06150	NAC domain protein NAC1	Q52QR5_SOYBN	0	AT1G69490.1	4e-112	NAC-like, activated by AP3/PI	GO:0006355 GO:0007275 GO:0009617 GO:0009825 GO:0009908 GO:0010150 GO:0045087	flower development; "in-te immune response"; "leaf senescence"; "multicellular organismal development"; "multidimensio-l cell growth"; "regulation of transcription, D--dependent"; "response to bacterium"	GO:0003677 GO:0003700	D- binding; "sequence-specific D- binding transcription factor activity"	GO:0005634	nucleus	5.05121	7.69174	7.07916	6.09749	4.5616	3.39843	3.27593	3.23687	3.41311
Glyma.01G053100	Glyma01g06370	Reduced leaflet 3	D3GBV1_LOTJA	0	AT1G69440.1	0	Argonaute family protein	GO:0010050 GO:0010267 GO:0010599 GO:0035195 GO:0040034	gene silencing by miR-; "production of lsiR- involved in R- interference"; "production of ta-siR-s involved in R- interference"; "regulation of development, heterochronic"; "vegetative phase change"	GO:0003676	nucleic acid binding	GO:0005737	cytoplasm	3.5521	2.68168	2.17088	0.774788	NA	-0.986998	-0.891919	-0.91204	-1.07126
Glyma.01G053300	Glyma01g06450	S-acyltransferase	I1J5V1_SOYBN	0	AT1G69420.1	0	DHHC-type zinc finger family protein	GO:0007020 GO:0008150 GO:0009664 GO:0009832 GO:0010075	biological process; "microtubule nucleation"; "plant-type cell wall biogenesis"; "plant-type cell wall organization"; "regulation of meristem growth"	GO:0008270	zinc ion binding	-	-	9.54586	7.00521	6.87419	5.3933	5.44547	5.70385	5.24832	5.08253	4.64325
Glyma.01G053600	Glyma01g06530	F7A19.6 protein	Q9XI89_ARATH	2e-176	AT1G13970.1	2e-179	Protein of unknown function (DUF1336)	GO:0006499 GO:0010359	N-termi-l protein myristoylation; "regulation of anion channel activity"	GO:0003674	molecular function	GO:0005739	mitochondrion	1.84668	1.13761	1.42406	-1.52331	NA	NA	NA	NA	NA
Glyma.01G053700	Glyma01g06540	Exosome complex exonuclease RRP40	B7FLI0_MEDTR	1e-149	AT4G32175.1	7e-128	PNAS-3 related	GO:0008150	biological process	-	-	GO:0009507	chloroplast	5.96624	4.76021	4.5492	3.92816	1.70276	2.37469	0.710769	0.655196	1.58888
Glyma.01G054000	Glyma01g06600	Translation initiation factor	A6YGE9_CARPA	4e-108	AT1G13950.1	3e-99	eukaryotic elongation factor 5A-1	GO:0006413 GO:0006452 GO:0008612 GO:0010089 GO:0045901 GO:0045905	peptidyl-lysine modification to hypusine; "positive regulation of translatio-l elongation"; "positive regulation of translatio-l termi-tion"; "translatio-l frameshifting"; "translatio-l initiation"; "xylem development"	GO:0003723 GO:0003743 GO:0003746 GO:0043022	R- binding; "ribosome binding"; "translation elongation factor activity"; "translation initiation factor activity"	GO:0005737	cytoplasm	5.06705	4.05802	3.75923	2.46843	1.61395	2.21286	2.79236	2.68949	2.36209
Glyma.01G054200	Glyma01g06620	Plastid division regulator MinE	Q45RR9_SOYBN	2e-154	AT1G69390.1	1e-90	homologue of bacterial MinE 1	GO:0010020 GO:0032955 GO:0051301	cell division; "chloroplast fission"; "regulation of barrier septum assembly"	GO:0005515 GO:0042802 GO:0051117	ATPase binding; "identical protein binding"; "protein binding"	GO:0009507 GO:0009706	chloroplast; "chloroplast inner membrane"	6.87565	7.32244	7.31201	6.86924	5.45849	4.95334	5.11077	5.36	5.00064
Glyma.01G054400	Glyma01g06640	-	-	-	AT2G03350.1	5e-98	Protein of unknown function, DUF538	GO:0008150	biological process	-	-	GO:0005575	cellular component	9.92395	6.98266	7.13507	4.51937	2.65429	3.92881	4.05264	3.84505	3.79928
Glyma.01G054500	Glyma01g06660	Chorismate mutase	G7JWQ4_MEDTR	8e-140	AT1G69370.1	1e-137	chorismate mutase 3	GO:0000162 GO:0009073 GO:0042742 GO:0046417	aromatic amino acid family biosynthetic process; "chorismate metabolic process"; "defense response to bacterium"; "tryptophan biosynthetic process"	GO:0004106	chorismate mutase activity	GO:0009507 GO:0009536	chloroplast; "plastid"	7.603	8.02655	7.61651	7.44022	6.10259	5.53742	5.75032	5.86359	5.76393
Glyma.01G055000	Glyma01g06700	F-box only protein	G7JXU8_MEDTR	1e-131	AT2G03390.1	4e-118	uvrB/uvrC motif-containing protein	GO:0006289	nucleotide-excision repair	GO:0003677 GO:0004518	D- binding; "nuclease activity"	GO:0005634 GO:0009507	chloroplast; "nucleus"	5.03766	3.79618	3.29042	2.53924	0.0476376	-0.000621929	-0.891919	-0.91204	-1.07126
Glyma.01G055400	Glyma01g06740	-	-	-	AT2G03420.1	4e-51	unknown protein; Has 38 Blast hits to 38 proteins in 17 species: Archae - 0; Bacteria - 0; Metazoa - 0; Fungi - 0; Plants - 38; Viruses - 0; Other Eukaryotes - 0 (source: NCBI BLink).	GO:0000023 GO:0008150 GO:0010103 GO:0019252 GO:0019288 GO:0045893	biological process; "isopentenyl diphosphate biosynthetic process, mevalo-te-independent pathway"; "maltose metabolic process"; "positive regulation of transcription, D--dependent"; "starch biosynthetic process"; "stomatal complex morphogenesis"	GO:0003674	molecular function	GO:0009507	chloroplast	5.70876	5.07438	5.20913	3.90781	2.82228	1.64536	1.44228	1.53161	1.42795
Glyma.01G056000	Glyma01g06810	Remorin family protein	D7KBE9_ARALL	4e-26	AT1G13920.1	1e-24	Remorin family protein	GO:0008150	biological process	GO:0003677	D- binding	GO:0005737	cytoplasm	0.850753	0.532757	0.974578	-1.52331	2.65725	3.42537	3.38951	3.29989	2.68423
Glyma.01G056100	Glyma01g06820	SRG1-like protein	G7K0H8_MEDTR	0	AT1G17020.1	5e-139	senescence-related gene 1	GO:0009737 GO:0009793 GO:0009813 GO:0009830 GO:0009845 GO:0010162 GO:0010260 GO:0055114	cell wall modification involved in abscission; "embryo development ending in seed dormancy"; "flavonoid biosynthetic process"; "organ senescence"; "oxidation-reduction process"; "response to abscisic acid stimulus"; "seed dormancy process"; "seed germi-tion"	GO:0016491 GO:0016682 GO:0016706	oxidoreductase activity; "oxidoreductase activity, acting on diphenols and related substances as donors, oxygen as acceptor"; "oxidoreductase activity, acting on paired donors, with incorporation or reduction of molecular oxygen, 2-oxoglutarate as one donor, and incorporation of one atom each of oxygen into both donors"	GO:0005737	cytoplasm	7.05668	4.22055	4.09425	2.08496	2.39829	2.23596	1.00604	1.00061	2.41835
Glyma.01G056300	Glyma01g06840	Leucine-rich repeat resistance protein-like protein	C6ZS11_SOYBN	0	AT5G61240.1	0	Leucine-rich repeat (LRR) family protein	GO:0002237 GO:0007165 GO:0010103 GO:0048443	response to molecule of bacterial origin; "sig-l transduction"; "stamen development"; "stomatal complex morphogenesis"	-	-	GO:0005768 GO:0005794 GO:0005802 GO:0005886	Golgi apparatus; "endosome"; "plasma membrane"; "trans-Golgi network"	7.58808	6.40832	6.35633	5.1044	4.69522	5.17225	4.90197	5.22657	4.45999
Glyma.01G056400	Glyma01g06850	CLE19 protein	E9L565_SOYBN	7e-71	AT1G26600.1	2e-16	CLAVATA3/ESR-RELATED 9	GO:0007165	sig-l transduction	GO:0005102	receptor binding	GO:0005576 GO:0048046	apoplast; "extracellular region"	1.40925	0.884272	0.835927	-1.52331	0.212256	0.602284	NA	NA	NA
Glyma.01G056800	Glyma01g06870	WRKY32	A7LHH3_SOYBN	0	AT1G69310.2	4e-74	WRKY DNA-binding protein 57	GO:0006355 GO:0006970 GO:0009414 GO:0009651	regulation of transcription, D--dependent; "response to osmotic stress"; "response to salt stress"; "response to water deprivation"	GO:0003700	sequence-specific D- binding transcription factor activity	GO:0005634	nucleus	3.07469	2.48946	2.50906	1.275	-0.362116	1.30728	1.96491	1.99239	0.951408
Glyma.01G057100	Glyma01g06970	UDP-glucose 6-dehydrogenase	I1J5Y9_SOYBN	0	AT3G29360.2	0	UDP-glucose 6-dehydrogenase family protein	GO:0005975 GO:0006007 GO:0006065 GO:0007030 GO:0007033 GO:0048767 GO:0052546	Golgi organization; "UDP-glucuro-te biosynthetic process"; "carbohydrate metabolic process"; "cell wall pectin metabolic process"; "glucose catabolic process"; "root hair elongation"; "vacuole organization"	GO:0003979	UDP-glucose 6-dehydroge-se activity	GO:0005634 GO:0005737 GO:0005829	cytoplasm; "cytosol"; "nucleus"	10.346	7.34585	7.23564	4.55019	3.22713	4.17441	4.52123	4.42203	4.16958
Glyma.01G057400	Glyma01g07010	COBW domain-containing protein	G7JWS4_MEDTR	0	AT1G26520.1	0	Cobalamin biosynthesis CobW-like protein	GO:0008150	biological process	GO:0003674	molecular function	GO:0005634	nucleus	9.47503	9.26626	9.22673	8.75736	6.98951	6.64599	6.68366	6.80363	6.56747
Glyma.01G057500	Glyma01g07020	Dehydration-responsive family protein	B9HXK3_POPTR	0	AT1G13860.3	0	QUASIMODO2 LIKE 1	-	-	GO:0008168	methyltransferase activity	GO:0005774 GO:0005794	Golgi apparatus; "vacuolar membrane"	6.34317	5.55491	5.13471	4.05918	2.74278	3.03981	3.27593	3.23687	2.95592
Glyma.01G057600	Glyma01g07040	Pentatricopeptide repeat-containing family protein	B9IJ07_POPTR	0	AT1G26500.1	0	Pentatricopeptide repeat (PPR) superfamily protein	GO:0008150	biological process	GO:0003674	molecular function	GO:0005739	mitochondrion	5.73858	8.31902	8.76001	7.43568	5.87726	5.94293	6.76667	6.37843	6.27908
Glyma.01G057700	Glyma01g07046	-	-	-	-	-	-	-	-	-	-	-	-	4.41731	3.42254	3.02707	3.06994	-1.35736	-0.000621929	1.69798	1.78007	1.05405
Glyma.01G058100	Glyma01g07080	-	-	-	-	-	-	-	-	-	-	-	-	2.76528	3.08148	3.06809	3.53221	1.96727	2.07669	0.54722	0.563364	2.44413
Glyma.01G058300	Glyma01g07100	Glucan endo-1,3-beta-glucosidase-like protein	G7JHI2_MEDTR	3e-63	AT1G18650.1	1e-41	plasmodesmata callose-binding protein 3	GO:0008150	biological process	GO:0001872 GO:0030247	(1->3)-beta-D-glucan binding; "polysaccharide binding"	GO:0005886 GO:0009506 GO:0031225	anchored to membrane; "plasma membrane"; "plasmodesma"	11.4217	9.84069	9.80112	8.4333	6.96244	7.46917	8.14367	8.31815	8.06912
Glyma.01G058400	Glyma01g07110	2-hydroxy-6-oxo-6-phenylhexa-2,4-dienoate hydrolase	G7JWW5_MEDTR	0	AT1G13820.1	5e-159	alpha/beta-Hydrolases superfamily protein	-	-	GO:0003824 GO:0016787	catalytic activity; "hydrolase activity"	GO:0005737	cytoplasm	7.29422	6.16331	5.90939	4.99482	0.844749	1.33261	1.74428	1.79195	2.56596
Glyma.01G058500	Glyma01g07120	Probable ureide permease A3 (Fragment)	UPSA3_VIGUN	0	AT2G03530.2	0	ureide permease 2	GO:0015931	nucleobase-containing compound transport	GO:0015505	uracil:cation symporter activity	GO:0005886	plasma membrane	5.57788	4.71416	4.42293	3.01622	-1.35736	-1.01334	NA	NA	NA
Glyma.01G058600	Glyma01g07130	Cytochrome b6	CYB6_SOYBN	3e-71	ATCG00720.1	5e-72	photosynthetic electron transfer B	GO:0006091 GO:0006354 GO:0009407 GO:0009773 GO:0009832 GO:0010583 GO:0015979 GO:0016049 GO:0019684 GO:0022904 GO:0030243	D--dependent transcription, elongation; "cell growth"; "cellulose metabolic process"; "generation of precursor metabolites and energy"; "photosynthesis"; "photosynthesis, light reaction"; "photosynthetic electron transport in photosystem I"; "plant-type cell wall biogenesis"; "respiratory electron transport chain"; "response to cyclopentenone"; "toxin catabolic process"	GO:0009055 GO:0016491 GO:0020037	electron carrier activity; "heme binding"; "oxidoreductase activity"	GO:0009507 GO:0009512 GO:0009534 GO:0009535 GO:0009579 GO:0016020	chloroplast; "chloroplast thylakoid"; "chloroplast thylakoid membrane"; "cytochrome b6f complex"; "membrane"; "thylakoid"	4.07148	4.70792	4.50349	5.75633	6.73794	7.2999	5.49767	5.96292	5.23198
Glyma.01G058700	Glyma01g07140	Pentatricopeptide repeat-containing protein	G7LH31_MEDTR	0	AT3G22470.1	1e-143	Pentatricopeptide repeat (PPR) superfamily protein	GO:0008150	biological process	GO:0003674	molecular function	GO:0005739	mitochondrion	4.90722	3.81924	3.23861	3.34285	1.1166	1.60921	1.00604	1.00061	1.00311
Glyma.01G059000	Glyma01g07160	Pentatricopeptide repeat-containing protein	G7LH31_MEDTR	0	AT1G12700.1	2e-146	ATP binding;nucleic acid binding;helicases	GO:0080156	mitochondrial mR- modification	GO:0003676 GO:0004386 GO:0005524	ATP binding; "helicase activity"; "nucleic acid binding"	GO:0005739	mitochondrion	4.75631	3.36671	3.033	1.92849	1.49911	1.03253	-0.114753	-0.081287	-0.927841
Glyma.01G059200	Glyma01g07190	F21F23.21 protein	Q9LMX1_ARATH	0	AT1G13770.1	0	Protein of unknown function, DUF647	GO:0008150	biological process	GO:0003674	molecular function	GO:0005575	cellular component	5.645	5.19863	4.70922	4.22288	2.18832	2.83173	3.14371	3.07221	2.84811
Glyma.01G059400	#N/A	Ribulose-1,5 bisphosphate carboxylase/oxygenase large subunit N-methyltransferase, chloroplastic	RBCMT_PEA	1e-71	AT1G14030.1	2e-43	Rubisco methyltransferase family protein	GO:0000023 GO:0006655 GO:0009073 GO:0009793 GO:0009902 GO:0010027 GO:0016226 GO:0018023 GO:0019252 GO:0019288 GO:0034660	aromatic amino acid family biosynthetic process; "chloroplast relocation"; "embryo development ending in seed dormancy"; "iron-sulfur cluster assembly"; "isopentenyl diphosphate biosynthetic process, mevalo-te-independent pathway"; "maltose metabolic process"; "ncR- metabolic process"; "peptidyl-lysine trimethylation"; "phosphatidylglycerol biosynthetic process"; "starch biosynthetic process"; "t…	GO:0016279 GO:0030785	[ribulose-bisphosphate carboxylase]-lysine N-methyltransferase activity; "protein-lysine N-methyltransferase activity"	GO:0009507 GO:0009570	chloroplast; "chloroplast stroma"	2.35893	2.99198	3.13607	2.53924	0.503705	0.998455	1.00604	1.00061	-0.0798389
Glyma.01G059900	Glyma01g07300	Pentatricopeptide repeat-containing protein	G7LH31_MEDTR	0	AT1G12700.1	2e-145	ATP binding;nucleic acid binding;helicases	GO:0080156	mitochondrial mR- modification	GO:0003676 GO:0004386 GO:0005524	ATP binding; "helicase activity"; "nucleic acid binding"	GO:0005739	mitochondrion	6.28156	6.04503	5.90077	5.35451	4.01858	3.9832	3.18378	3.16273	2.98166
Glyma.01G060900	#N/A	Protein SPIRAL1-like 1	SP1L1_ARATH	4e-26	AT1G26355.1	5e-29	SPIRAL1-like1	-	-	-	-	GO:0005886	plasma membrane	10.2402	8.69686	8.72014	7.37294	5.87496	6.60555	7.27171	6.90197	6.66884
Glyma.01G061600	Glyma01g07661	-	-	-	-	-	-	-	-	-	-	-	-	1.55547	2.39968	0.629368	3.01563	3.96626	5.10778	4.39715	4.3848	3.56705
Glyma.01G063000	Glyma01g07930	Alpha-1,4-glucan-protein synthase [UDP-forming]	UPTG_PEA	0	AT3G02230.1	0	reversibly glycosylated polypeptide 1	GO:0009555 GO:0009651 GO:0009832 GO:0030244 GO:0033356 GO:0071555 GO:0071669	UDP-L-arabinose metabolic process; "cell wall organization"; "cellulose biosynthetic process"; "plant-type cell wall biogenesis"; "plant-type cell wall organization or biogenesis"; "pollen development"; "response to salt stress"	GO:0005515 GO:0008466 GO:0016758 GO:0016760 GO:0016866 GO:0052691	UDP-arabinopyranose mutase activity; "cellulose synthase (UDP-forming) activity"; "glycogenin glucosyltransferase activity"; "intramolecular transferase activity"; "protein binding"; "transferase activity, transferring hexosyl groups"	GO:0000138 GO:0005618 GO:0005634 GO:0005774 GO:0005794 GO:0005795 GO:0005829 GO:0022626 GO:0030054	Golgi apparatus; "Golgi stack"; "Golgi trans cister-"; "cell junction"; "cell wall"; "cytosol"; "cytosolic ribosome"; "nucleus"; "vacuolar membrane"	9.4486	7.5091	7.4253	5.88634	4.97165	5.25915	5.28197	5.22054	4.70483
Glyma.01G063100	Glyma01g07940	Salicylic acid methyl transferase-like protein	B5A7G4_SOYBN	0	AT4G36470.1	5e-170	S-adenosyl-L-methionine-dependent methyltransferases superfamily protein	-	-	GO:0008168 GO:0008757	S-adenosylmethionine-dependent methyltransferase activity; "methyltransferase activity"	GO:0005634	nucleus	7.00865	5.6884	5.664	4.3715	2.72825	3.55519	3.14371	3.07221	3.24436
Glyma.01G063700	Glyma01g08056	Squamosa promoter binding protein	G7JX04_MEDTR	0	AT1G69170.1	1e-64	Squamosa promoter-binding protein-like (SBP domain) transcription factor family protein	GO:0006355 GO:0010468 GO:0042742	defense response to bacterium; "regulation of gene expression"; "regulation of transcription, D--dependent"	GO:0003677 GO:0003700	D- binding; "sequence-specific D- binding transcription factor activity"	GO:0005634	nucleus	5.62892	4.57452	3.98663	3.6991	3.12416	3.27178	2.19913	2.16904	2.1584
Glyma.01G064900	Glyma01g08540	18S pre-ribosomal assembly protein gar2	B9HIU6_POPTR	2e-34	AT2G03810.4	5e-29	18S pre-ribosomal assembly protein gar2-related	GO:0006499	N-termi-l protein myristoylation	GO:0003674	molecular function	GO:0005886	plasma membrane	4.44129	5.46017	4.76668	6.30045	6.67569	7.07689	7.12411	7.39777	7.12054
Glyma.01G065000	Glyma01g08560	-	-	-	-	-	-	-	-	-	-	-	-	3.16162	3.37012	3.02477	3.26382	-0.639723	1.5204	2.09307	2.00983	2.4501
Glyma.01G065700	Glyma01g08631	-	-	-	-	-	-	-	-	-	-	-	-	1.49025	2.90778	1.24597	2.33873	1.82944	1.64536	-1.10717	-1.08887	0.0814936
Glyma.01G065800	Glyma01g08640	Cc-nbs-lrr resistance protein	G7IZD1_MEDTR	0	AT3G14470.1	5e-138	NB-ARC domain-containing disease resistance protein	GO:0006952 GO:0009627 GO:0009697	defense response; "salicylic acid biosynthetic process"; "systemic acquired resistance"	GO:0005515 GO:0043531	ADP binding; "protein binding"	GO:0005576	extracellular region	3.35337	3.57928	4.49819	3.46284	1.95136	2.02495	1.59224	1.58434	0.497073
Glyma.01G067200	Glyma01g09190	GDSL-motif lipase/hydrolase family protein	D7LQN2_ARALL	1e-86	AT2G03980.1	1e-88	GDSL-like Lipase/Acylhydrolase superfamily protein	GO:0006629	lipid metabolic process	GO:0004091 GO:0016788	carboxylesterase activity; "hydrolase activity, acting on ester bonds"	GO:0005576	extracellular region	7.15171	4.56804	4.3548	1.73508	-1.35736	-0.000621929	0.54722	0.563364	-1.07126
Glyma.01G067600	Glyma01g09220	Hexose transporter	G7IWC2_MEDTR	0	AT1G11260.1	0	sugar transporter 1	GO:0009627 GO:0015749 GO:0031347	monosaccharide transport; "regulation of defense response"; "systemic acquired resistance"	GO:0005351 GO:0015144 GO:0015145	carbohydrate transmembrane transporter activity; "monosaccharide transmembrane transporter activity"; "sugar:hydrogen symporter activity"	GO:0005634 GO:0005737 GO:0005773 GO:0005886 GO:0009506 GO:0016020	cytoplasm; "membrane"; "nucleus"; "plasma membrane"; "plasmodesma"; "vacuole"	8.24512	8.31456	8.41683	6.71228	3.40751	3.74853	3.87117	3.77802	3.64687
Glyma.01G068800	Glyma01g09420	-2 Isoform 2 of WPP domain-interacting tail-anchored protein 2	A8MQR0-2	1e-147	AT1G68910.3	1e-150	WPP domain-interacting protein 2	GO:0008150	biological process	GO:0003674	molecular function	GO:0005634	nucleus	5.98193	5.20019	5.34894	4.16532	1.82944	1.87049	1.23988	1.29073	0.618643
Glyma.01G069000	Glyma01g09460	-	-	-	-	-	-	-	-	-	-	-	-	6.31429	2.99118	2.88109	NA	NA	NA	NA	NA	NA
Glyma.01G069200	Glyma01g09500	40S ribosomal protein S10-like protein	G7KC05_MEDTR	8e-18	AT5G52650.1	3e-19	RNA binding Plectin/S10 domain-containing protein	GO:0006412 GO:0009664 GO:0042545	cell wall modification; "plant-type cell wall organization"; "translation"	GO:0003735	structural constituent of ribosome	GO:0005618 GO:0005737 GO:0016020 GO:0022626 GO:0022627	cell wall; "cytoplasm"; "cytosolic ribosome"; "cytosolic small ribosomal subunit"; "membrane"	-1.49729	-1.02355	-0.860516	0.0969565	1.1166	1.03253	-1.10717	-1.08887	NA
Glyma.01G069400	Glyma01g09515	Phytosulfokines 1	PSK1_ARATH	1e-06	AT1G13590.1	1e-09	phytosulfokine 1 precursor	GO:0008283 GO:0016049	cell growth; "cell proliferation"	GO:0008083	growth factor activity	GO:0005576 GO:0031012	extracellular matrix; "extracellular region"	5.51057	3.1929	2.81887	0.0555561	NA	NA	NA	NA	NA
Glyma.01G069600	#N/A	-	-	-	-	-	-	-	-	-	-	-	-	6.59389	8.31407	8.53936	7.4795	4.94871	5.16066	5.70383	5.62118	5.29724
Glyma.01G070300	Glyma01g09660	Uridine kinase	I1J693_SOYBN	0	AT1G26190.1	0	Phosphoribulokinase / Uridine kinase family	GO:0006796 GO:0008152 GO:0009058 GO:0009909 GO:0016570 GO:0048449	biosynthetic process; "floral organ formation"; "histone modification"; "metabolic process"; "phosphate-containing compound metabolic process"; "regulation of flower development"	GO:0005524 GO:0016301 GO:0016773	ATP binding; "ki-se activity"; "phosphotransferase activity, alcohol group as acceptor"	GO:0009507	chloroplast	6.47916	8.38395	7.57928	8.74013	9.53408	10.0333	9.84115	9.7434	9.53687
Glyma.01G070400	Glyma01g09900	Glutamate formiminotransferase	B6UFR4_MAIZE	2e-106	AT2G20830.1	2e-94	transferases;folic acid binding	GO:0008152	metabolic process	GO:0005542 GO:0016740	folic acid binding; "transferase activity"	GO:0009507	chloroplast	10.5163	8.70471	8.88451	6.66156	4.00075	4.46912	4.45419	4.35568	4.41469
Glyma.01G070500	#N/A	-	-	-	-	-	-	-	-	-	-	-	-	5.4753	4.13979	4.5614	3.42433	1.70276	2.37469	1.59224	1.58434	1.30282
Glyma.01G070600	#N/A	-	-	-	-	-	-	-	-	-	-	-	-	-0.469402	-1.00977	-1.15491	NA	-0.362116	0.998455	1.00604	1.00061	1.62926
Glyma.01G071000	Glyma01g10004	F22F7.17 protein	Q9MA52_ARATH	0	AT3G05390.1	0	FUNCTIONS IN: molecular_function unknown; INVOLVED IN: biological_process unknown; LOCATED IN: mitochondrion; EXPRESSED IN: 15 plant structures; EXPRESSED DURING: 7 growth stages; CONTAINS InterPro DOMAIN/s: Protein of unknown function DUF248, methyltransferase putative (InterPro:IPR004159); BEST Arabidopsis thaliana protein match is: S-adenosyl-L-methionine-dependent methyltransferases superfami…	-	-	GO:0008168	methyltransferase activity	GO:0005794	Golgi apparatus	1.79818	2.28696	-0.182774	1.24361	NA	NA	NA	NA	NA
Glyma.01G071700	Glyma01g10100	Leucine-rich repeat receptor-like kinase	Q0PW22_POPTO	0	AT5G16000.1	0	NSP-interacting kinase 1	GO:0000271 GO:0006468 GO:0009736 GO:0009825 GO:0009932 GO:0010075 GO:0010817 GO:0043481 GO:0048767 GO:0051607 GO:0071555	anthocyanin accumulation in tissues in response to UV light; "cell tip growth"; "cell wall organization"; "cytokinin mediated sig-ling pathway"; "defense response to virus"; "multidimensio-l cell growth"; "polysaccharide biosynthetic process"; "protein phosphorylation"; "regulation of hormone levels"; "regulation of meristem growth"; "root hair elongation"	GO:0004672 GO:0004674 GO:0005515 GO:0005524 GO:0016301 GO:0016772	ATP binding; "ki-se activity"; "protein binding"; "protein ki-se activity"; "protein serine/threonine ki-se activity"; "transferase activity, transferring phosphorus-containing groups"	GO:0005576 GO:0005886	extracellular region; "plasma membrane"	5.44999	3.16756	3.12308	0.0555561	-0.362116	0.00114721	NA	NA	-0.927841
Glyma.01G072800	Glyma01g10350	-	-	-	AT1G16080.1	2e-48	unknown protein; LOCATED IN: apoplast, chloroplast stroma, chloroplast, chloroplast envelope; EXPRESSED IN: 23 plant structures; EXPRESSED DURING: 14 growth stages; Has 81 Blast hits to 81 proteins in 28 species: Archae - 0; Bacteria - 2; Metazoa - 0; Fungi - 0; Plants - 62; Viruses - 0; Other Eukaryotes - 17 (source: NCBI BLink).	GO:0006098 GO:0009965 GO:0010027 GO:0016117 GO:0030154	carotenoid biosynthetic process; "cell differentiation"; "leaf morphogenesis"; "pentose-phosphate shunt"; "thylakoid membrane organization"	-	-	GO:0009507 GO:0009570 GO:0009941 GO:0048046	apoplast; "chloroplast"; "chloroplast envelope"; "chloroplast stroma"	5.50247	4.65485	4.12945	3.06942	1.53488	2.05225	2.34457	2.45362	2.07328
Glyma.01G074500	Glyma0023s00515	PRIB5 protein	Q8LE79_ARATH	2e-89	AT3G60450.1	4e-93	Phosphoglycerate mutase family protein	GO:0008150 GO:0009627 GO:0034976	biological process; "response to endoplasmic reticulum stress"; "systemic acquired resistance"	-	-	GO:0005634 GO:0005829	cytosol; "nucleus"	5.74116	5.111	5.59113	4.00517	2.74278	2.70974	3.34883	3.48631	2.59114
Glyma.01G075200	#N/A	-	-	-	-	-	-	-	-	-	-	-	-	0.415688	1.06348	-0.860516	1.06292	3.38512	4.35285	3.69679	3.54431	2.92688
Glyma.01G075800	Glyma01g15134	Squamosa promoter-binding-like protein 7	SPL7_ORYSJ	7e-53	AT1G27370.4	1e-38	squamosa promoter binding protein-like 10	GO:0006355 GO:0010358 GO:0045893 GO:0048510	leaf shaping; "positive regulation of transcription, D--dependent"; "regulation of timing of transition from vegetative to reproductive phase"; "regulation of transcription, D--dependent"	GO:0003677 GO:0003700	D- binding; "sequence-specific D- binding transcription factor activity"	GO:0005634	nucleus	3.74106	3.80782	2.68793	3.3144	2.07986	1.87049	1.23988	1.29073	0.00225974
Glyma.01G075900	Glyma01g15258	Squamosa promoter binding protein	G7LBJ7_MEDTR	4e-91	AT1G02065.1	1e-64	squamosa promoter binding protein-like 8	GO:0009554 GO:0009556 GO:0048653	anther development; "megasporogenesis"; "microsporogenesis"	GO:0003677	D- binding	GO:0005634	nucleus	NA	NA	NA	NA	0.212256	0.602284	-1.10717	-1.08887	1.09835
Glyma.01G076000	Glyma01g15382	DNA-directed RNA polymerase	K7K2H9_SOYBN	2e-43	ATCG00180.1	5e-38	DNA-directed RNA polymerase family protein	GO:0006091 GO:0006351 GO:0006354 GO:0015979	D--dependent transcription, elongation; "generation of precursor metabolites and energy"; "photosynthesis"; "transcription, D--dependent"	GO:0003677 GO:0003899	D--directed R- polymerase activity; "D- binding"	GO:0009295 GO:0009507	chloroplast; "nucleoid"	3.73468	5.33897	3.55701	6.29867	6.28808	7.10984	4.80233	4.80502	4.75318
Glyma.01G076700	Glyma01g15860	-	-	-	-	-	-	-	-	-	-	-	-	3.21889	2.05728	1.52153	-0.52691	NA	NA	NA	NA	NA
Glyma.01G077500	Glyma01g16673	-	-	-	AT1G40390.1	1e-09	DNAse I-like superfamily protein	GO:0008150	biological process	GO:0003674	molecular function	GO:0005634	nucleus	2.71703	4.36338	3.64559	5.24707	5.5589	6.50655	5.64668	5.30598	5.36523
Glyma.01G077900	Glyma01g17230	Chloroplast lumen common family protein	B9IIV4_POPTR	7e-11	AT2G37400.1	3e-12	Tetratricopeptide repeat (TPR)-like superfamily protein	GO:0006626 GO:0008150	biological process; "protein targeting to mitochondrion"	-	-	GO:0009507 GO:0009536 GO:0009543 GO:0009941	chloroplast; "chloroplast envelope"; "chloroplast thylakoid lumen"; "plastid"	6.5266	6.52156	6.43349	6.39962	3.91828	4.33711	4.50278	4.43163	4.23518
Glyma.01G078000	Glyma01g17240	Cysteine-rich repeat secretory protein 15	CRR15_ARATH	2e-109	AT3G60720.1	2e-112	plasmodesmata-located protein 8	GO:0008150	biological process	GO:0003674	molecular function	GO:0005886	plasma membrane	1.44341	1.59619	-0.182774	0.46158	NA	NA	NA	NA	-0.927841
Glyma.01G080400	Glyma01g19200	Thioesterase-like protein	G7K1I9_MEDTR	4e-109	AT1G68260.1	4e-89	Thioesterase superfamily protein	GO:0008150 GO:0019344	biological process; "cysteine biosynthetic process"	GO:0016788 GO:0047617	acyl-CoA hydrolase activity; "hydrolase activity, acting on ester bonds"	-	-	5.45205	4.0114	3.65775	2.61275	0.0476376	-0.000621929	0.0047454	0.00190919	-1.07126
Glyma.01G080500	Glyma01g19420	-	-	-	AT1G68440.1	5e-32	unknown protein; BEST Arabidopsis thaliana protein match is: unknown protein (TAIR:AT1G25400.2); Has 86 Blast hits to 86 proteins in 29 species: Archae - 0; Bacteria - 6; Metazoa - 27; Fungi - 11; Plants - 24; Viruses - 0; Other Eukaryotes - 18 (source: NCBI BLink).	GO:0006598 GO:0008150 GO:0009698 GO:0042398	biological process; "cellular modified amino acid biosynthetic process"; "phenylpropanoid metabolic process"; "polyamine catabolic process"	GO:0003674	molecular function	GO:0005634	nucleus	8.43625	6.91005	6.75317	6.43862	4.4596	4.41869	3.80287	3.80448	3.34344
Glyma.01G080700	Glyma01g20030	Dihydroflavonol-4-reductase	G7K1K4_MEDTR	0	AT1G68540.1	0	NAD(P)-binding Rossmann-fold superfamily protein	GO:0010584 GO:0044237 GO:0080110	cellular metabolic process; "pollen exine formation"; "sporopollenin biosynthetic process"	GO:0000166 GO:0003824 GO:0016491 GO:0050662	catalytic activity; "coenzyme binding"; "nucleotide binding"; "oxidoreductase activity"	GO:0005829	cytosol	9.40104	7.63657	7.4253	5.94722	4.77358	5.12909	4.42151	4.26789	4.82002
Glyma.01G080900	Glyma01g20230	COSII	G7JX88_MEDTR	2e-122	AT1G13380.1	3e-90	Protein of unknown function (DUF1218)	GO:0008150	biological process	GO:0003674	molecular function	GO:0005576	extracellular region	5.71344	3.9755	3.34421	2.24814	1.8514	2.52578	1.96491	1.99239	1.83039
Glyma.01G081300	Glyma01g20460	Alpha-D-xylosidase	G7JXA7_MEDTR	0	AT1G68560.1	0	alpha-xylosidase 1	GO:0000272 GO:0005975 GO:0005982 GO:0009664 GO:0009832 GO:0010411 GO:0045493 GO:0046686	carbohydrate metabolic process; "plant-type cell wall biogenesis"; "plant-type cell wall organization"; "polysaccharide catabolic process"; "response to cadmium ion"; "starch metabolic process"; "xylan catabolic process"; "xyloglucan metabolic process"	GO:0004553 GO:0009044 GO:0046556 GO:0080176	alpha-N-arabinofuranosidase activity; "hydrolase activity, hydrolyzing O-glycosyl compounds"; "xylan 1,4-beta-xylosidase activity"; "xyloglucan 1,6-alpha-xylosidase activity"	GO:0005576 GO:0005618 GO:0009505 GO:0009506 GO:0009507 GO:0048046	apoplast; "cell wall"; "chloroplast"; "extracellular region"; "plant-type cell wall"; "plasmodesma"	10.2865	8.88892	8.26622	7.01148	4.42369	4.7923	3.91256	4.03227	3.38983
Glyma.01G081600	Glyma01g20700	Peptide transporter PTR	G7JZD5_MEDTR	0	AT1G68570.1	0	Major facilitator superfamily protein	GO:0006857	oligopeptide transport	GO:0005215	transporter activity	GO:0005886 GO:0016020	membrane; "plasma membrane"	8.66881	13.0092	12.9859	11.7481	10.5366	10.0301	10.4669	10.8667	10.5483
Glyma.01G082500	Glyma01g20790	-	-	-	AT1G68585.1	1e-19	unknown protein; Has 23 Blast hits to 23 proteins in 6 species: Archae - 0; Bacteria - 0; Metazoa - 0; Fungi - 0; Plants - 23; Viruses - 0; Other Eukaryotes - 0 (source: NCBI BLink).	GO:0008150	biological process	GO:0003674	molecular function	GO:0005575	cellular component	5.87657	4.48415	4.00877	2.83457	0.844749	1.58257	1.07372	1.02918	1.83039
Glyma.01G082900	Glyma01g20820	-	-	-	-	-	-	-	-	-	-	-	-	-1.49729	-1.02355	0.770687	-1.52331	NA	-0.986998	0.54722	0.563364	0.618643
Glyma.01G083000	Glyma01g20860	-	-	-	AT1G13340.1	1e-90	Regulator of Vps4 activity in the MVB pathway protein	GO:0006979 GO:0009697 GO:0009863 GO:0031348 GO:0045087	in-te immune response; "negative regulation of defense response"; "response to oxidative stress"; "salicylic acid biosynthetic process"; "salicylic acid mediated sig-ling pathway"	-	-	GO:0005737	cytoplasm	7.13122	5.6681	6.02889	4.19646	0.503705	1.30728	1.35783	1.33157	0.497073
Glyma.01G083300	Glyma01g20900	Nuclease S1	G7K0J7_MEDTR	2e-179	AT1G68290.1	9e-117	endonuclease 2	GO:0006308	D- catabolic process	GO:0003676 GO:0004519	endonuclease activity; "nucleic acid binding"	GO:0005576	extracellular region	0.415688	1.06348	0.171962	1.84318	-1.35736	-1.01334	NA	NA	NA
Glyma.01G083700	Glyma01g20950	Aluminum-activated malate transporter 4	ALMT4_ARATH	0	AT1G25480.1	0	Aluminium activated malate transporter family protein	GO:0010044	response to aluminum ion	GO:0003674	molecular function	GO:0005634	nucleus	5.01138	7.17677	7.15225	6.06787	4.12466	4.80623	5.01518	4.98535	5.12216
Glyma.01G084200	Glyma01g21120	PERIANTHIA family protein	B9HJ06_POPTR	0	AT1G68640.1	6e-157	bZIP transcription factor family protein	GO:0006355 GO:0009410 GO:0009909 GO:0030968 GO:0048451 GO:0048453	endoplasmic reticulum unfolded protein response; "petal formation"; "regulation of flower development"; "regulation of transcription, D--dependent"; "response to xenobiotic stimulus"; "sepal formation"	GO:0003677 GO:0003700 GO:0005515 GO:0043565 GO:0046983	D- binding; "protein binding"; "protein dimerization activity"; "sequence-specific D- binding"; "sequence-specific D- binding transcription factor activity"	GO:0005634	nucleus	0.850753	0.532757	-0.182774	-1.52331	NA	NA	NA	NA	NA
Glyma.01G084300	#N/A	F-box/LRR-repeat protein	G7JDH5_MEDTR	3e-25	AT2G01050.1	5e-10	zinc ion binding;nucleic acid binding	GO:0008150	biological process	GO:0003676 GO:0008270	nucleic acid binding; "zinc ion binding"	GO:0005634	nucleus	1.39801	2.72501	3.12065	3.37844	0.929377	1.36878	-1.10717	-1.08887	0.0814936
Glyma.01G086700	Glyma01g21900	Two-component response regulator ARR14	G7JYB4_MEDTR	2.33e-156	AT1G25550.1	2e-84	myb-like transcription factor family protein	GO:0006355 GO:0010167 GO:0015706	nitrate transport; "regulation of transcription, D--dependent"; "response to nitrate"	GO:0003677 GO:0003700	D- binding; "sequence-specific D- binding transcription factor activity"	GO:0005634	nucleus	7.63585	6.38625	6.1273	6.11334	7.45756	8.56026	8.69481	8.71477	8.11965
Glyma.01G086800	Glyma01g22120	Zinc finger-like protein	G7JYA5_MEDTR	5e-138	AT1G13290.1	4e-117	C2H2-like zinc finger protein	GO:0010087 GO:0010305 GO:0010588 GO:0048364 GO:0048367	cotyledon vascular tissue pattern formation; "leaf vascular tissue pattern formation"; "phloem or xylem histogenesis"; "root development"; "shoot system development"	GO:0003700 GO:0008270	sequence-specific D- binding transcription factor activity; "zinc ion binding"	GO:0005622 GO:0005634	intracellular; "nucleus"	3.94154	2.83536	3.29409	1.275	NA	-0.00299611	0.11726	0.0787796	-0.0798389
Glyma.01G087600	Glyma01g22333	-	-	-	-	-	-	-	-	-	-	-	-	NA	NA	1.97119	1.57341	1.61395	-0.000621929	-0.891919	-0.91204	0.618643
Glyma.01G087700	Glyma01g22406	Receptor-like protein kinase	G7JX54_MEDTR	0	AT1G25570.1	0	Di-glucose binding protein with Leucine-rich repeat domain	-	-	-	-	GO:0005768 GO:0005773 GO:0005794 GO:0005802 GO:0005886	Golgi apparatus; "endosome"; "plasma membrane"; "trans-Golgi network"; "vacuole"	7.26343	7.45825	7.65611	6.53135	5.36238	5.89177	5.11232	5.23348	5.06362
Glyma.01G087800	Glyma01g22480	Glycosyltransferase CAZy family GT8	G7J889_MEDTR	0	AT1G13250.1	7e-176	galacturonosyltransferase-like 3	GO:0016051	carbohydrate biosynthetic process	GO:0016757 GO:0016758 GO:0047262	polygalacturo-te 4-alpha-galacturonosyltransferase activity; "transferase activity, transferring glycosyl groups"; "transferase activity, transferring hexosyl groups"	GO:0005794	Golgi apparatus	10.0811	6.37447	6.41972	2.83457	1.39652	2.49798	1.41454	1.35109	1.54812
Glyma.01G087900	Glyma01g22490	Serine/threonine protein kinase SNT7	G7JX40_MEDTR	0	AT1G68830.1	0	STT7 homolog STN7	GO:0006468 GO:0007623 GO:0015996 GO:0042548	chlorophyll catabolic process; "circadian rhythm"; "protein phosphorylation"; "regulation of photosynthesis, light reaction"	GO:0004672 GO:0004674 GO:0005524 GO:0016301 GO:0016772	ATP binding; "ki-se activity"; "protein ki-se activity"; "protein serine/threonine ki-se activity"; "transferase activity, transferring phosphorus-containing groups"	GO:0009507	chloroplast	8.07908	10.3348	10.3758	10.1253	7.81459	8.01485	8.26608	7.89965	7.92142
Glyma.01G088200	Glyma01g22510	NAC domain-containing protein	G7JX37_MEDTR	0	AT1G25580.1	1e-160	NAC (No Apical Meristem) domain transcriptional regulator superfamily protein	GO:0000077 GO:0006355 GO:0007275 GO:0010332 GO:0040020	D- damage checkpoint; "multicellular organismal development"; "regulation of meiosis"; "regulation of transcription, D--dependent"; "response to gamma radiation"	GO:0003677 GO:0003700	D- binding; "sequence-specific D- binding transcription factor activity"	GO:0005634	nucleus	5.58572	3.59205	3.4715	1.80097	1.95136	1.63411	-0.891919	-0.91204	-1.07126
Glyma.01G088300	Glyma01g22530	Basic helix-loop-helix family protein	B9HIY4_POPTR	4e-146	AT1G68810.1	3e-111	basic helix-loop-helix (bHLH) DNA-binding superfamily protein	GO:0006355	regulation of transcription, D--dependent	GO:0003677 GO:0003700	D- binding; "sequence-specific D- binding transcription factor activity"	GO:0005634	nucleus	4.03379	4.27448	3.4562	3.25655	0.844749	1.33261	0.632741	0.608358	0.55635
Glyma.01G088700	#N/A	Peroxisomal enoyl-CoA hydratase/isomerase family protein	B0M193_SOYBN	3e-33	AT4G16210.1	6e-28	enoyl-CoA hydratase/isomerase A	GO:0006635 GO:0008152	fatty acid beta-oxidation; "metabolic process"	GO:0003824	catalytic activity	GO:0005739 GO:0005777	mitochondrion; "peroxisome"	1.84668	1.13761	1.08245	-1.52331	0.0476376	-1.01334	-1.10717	-1.08887	0.675164
Glyma.01G089700	Glyma01g22650	Cytochrome b reductase	G7JX23_MEDTR	5e-127	AT1G26100.1	6e-97	Cytochrome b561/ferric reductase transmembrane protein family	-	-	GO:0008805	carbon-monoxide oxyge-se activity	GO:0016021	integral to membrane	1.40925	0.884272	0.372821	-1.52331	NA	NA	NA	NA	-0.927841
Glyma.01G089800	Glyma01g22670	Clavaminate synthase-like protein	M8BKT0_AEGTA	1e-106	AT3G21360.1	5e-78	2-oxoglutarate (2OG) and Fe(II)-dependent oxygenase superfamily protein	GO:0055114	oxidation-reduction process	GO:0016491	oxidoreductase activity	GO:0005634	nucleus	2.85296	2.24987	2.60255	0.46158	NA	NA	NA	NA	NA
Glyma.01G090400	Glyma01g22751	Protein IDA-LIKE 1	IDL1_ARATH	1e-08	AT3G25655.1	1e-11	inflorescence deficient in abscission (IDA)-like 1	GO:0010227 GO:0048765	floral organ abscission; "root hair cell differentiation"	GO:0003674	molecular function	GO:0005576	extracellular region	3.65382	3.85654	4.71662	2.83457	0.760157	0.574819	0.632741	0.608358	-0.0798389
Glyma.01G091000	Glyma01g22840	Phosphoenolpyruvate carboxylase	Q6Q2Z9_SOYBN	0	AT1G68750.1	0	phosphoenolpyruvate carboxylase 4	GO:0006099 GO:0015977	carbon fixation; "tricarboxylic acid cycle"	GO:0003824 GO:0008964	catalytic activity; "phosphoenolpyruvate carboxylase activity"	GO:0005737	cytoplasm	4.60027	3.30796	2.96866	1.61804	1.29575	1.58257	0.710769	0.655196	1.58888
Glyma.01G091100	Glyma01g22850	ABC transporter G family member	G7I4Z2_MEDTR	0	AT3G25620.2	0	ABC-2 type transporter family protein	-	-	GO:0000166 GO:0005524 GO:0016887 GO:0017111 GO:0042626	ATP binding; "ATPase activity"; "ATPase activity, coupled to transmembrane movement of substances"; "nucleoside-triphosphatase activity"; "nucleotide binding"	GO:0005634 GO:0009507 GO:0016020	chloroplast; "membrane"; "nucleus"	3.07469	2.48946	1.6744	2.45712	-1.35736	0.97597	0.710769	0.655196	1.30282
Glyma.01G091400	Glyma01g22880	Chalcone synthase 6	CHS6_SOYBN	0	AT5G13930.1	0	Chalcone and stilbene synthase family protein	GO:0006979 GO:0008152 GO:0009058 GO:0009411 GO:0009611 GO:0009629 GO:0009715 GO:0009718 GO:0009733 GO:0009744 GO:0009753 GO:0009813 GO:0009926 GO:0010224 GO:0031540	anthocyanin-containing compound biosynthetic process; "auxin polar transport"; "biosynthetic process"; "chalcone biosynthetic process"; "flavonoid biosynthetic process"; "metabolic process"; "regulation of anthocyanin biosynthetic process"; "response to UV"; "response to UV-B"; "response to auxin stimulus"; "response to gravity"; "response to jasmonic acid stimulus"; "response to oxidative stress…	GO:0003824 GO:0005515 GO:0016210 GO:0016746 GO:0016747	catalytic activity; "-ringenin-chalcone synthase activity"; "protein binding"; "transferase activity, transferring acyl groups"; "transferase activity, transferring acyl groups other than amino-acyl groups"	GO:0005634 GO:0005737 GO:0005783 GO:0009705	cytoplasm; "endoplasmic reticulum"; "nucleus"; "plant-type vacuole membrane"	1.09031	0.956444	1.35554	0.5	NA	NA	-1.10717	-1.08887	NA
Glyma.01G091900	#N/A	RNA polymerase beta'' subunit (Fragment)	A9XW73_EUCLU	4e-13	ATCG00170.1	7e-12	DNA-directed RNA polymerase family protein	GO:0006091 GO:0006351 GO:0006354 GO:0015979	D--dependent transcription, elongation; "generation of precursor metabolites and energy"; "photosynthesis"; "transcription, D--dependent"	GO:0003677 GO:0003899	D--directed R- polymerase activity; "D- binding"	GO:0009295 GO:0009507 GO:0009570	chloroplast; "chloroplast stroma"; "nucleoid"	2.38423	4.19609	2.34741	5.68743	5.02613	6.10583	3.42782	3.54833	3.13295
Glyma.01G092200	#N/A	-	-	-	-	-	-	-	-	-	-	-	-	4.21212	5.83464	5.53987	6.54944	7.20548	7.57955	7.80033	7.83018	7.68031
Glyma.01G092900	Glyma01g23140	Phospholipid-transporting ATPase 10	ALA10_ARATH	0	AT1G68710.1	0	ATPase E1-E2 type family protein / haloacid dehalogenase-like hydrolase family protein	GO:0006812 GO:0008152 GO:0015914	cation transport; "metabolic process"; "phospholipid transport"	GO:0000166 GO:0000287 GO:0003824 GO:0004012 GO:0005524 GO:0015662 GO:0016820 GO:0046872	ATP binding; "ATPase activity, coupled to transmembrane movement of ions, phosphorylative mechanism"; "catalytic activity"; "hydrolase activity, acting on acid anhydrides, catalyzing transmembrane movement of substances"; "magnesium ion binding"; "metal ion binding"; "nucleotide binding"; "phospholipid-translocating ATPase activity"	GO:0016020 GO:0016021	integral to membrane; "membrane"	7.77644	5.99515	5.92164	3.91002	3.56432	4.30134	3.49645	3.35936	3.47722
Glyma.01G095000	Glyma01g10900	Kunitz-type trypsin inhibitor KTI1	KTI1_SOYBN	2e-146	AT1G73260.1	1e-24	kunitz trypsin inhibitor 1	GO:0009651 GO:0009751 GO:0010167 GO:0012501 GO:0015706 GO:0042542 GO:0042742	defense response to bacterium; "nitrate transport"; "programmed cell death"; "response to hydrogen peroxide"; "response to nitrate"; "response to salicylic acid stimulus"; "response to salt stress"	GO:0004866	endopeptidase inhibitor activity	GO:0005576 GO:0005739	extracellular region; "mitochondrion"	17.6183	14.8178	14.9919	12.7586	11.9775	12.3808	12.944	12.6971	12.4272
Glyma.01G095500	Glyma06g35330	Transcription factor bHLH96	G7LH18_MEDTR	2e-144	AT5G46690.1	6e-69	beta HLH protein 71	GO:0006355	regulation of transcription, D--dependent	GO:0003677 GO:0003700	D- binding; "sequence-specific D- binding transcription factor activity"	GO:0005634	nucleus	6.72585	3.19586	3.08195	NA	NA	NA	NA	NA	NA
Glyma.01G095700	Glyma01g11130	Senescence-associated family protein	B9GZ87_POPTR	1e-147	AT5G46700.1	1e-126	Tetraspanin family protein	GO:0007389 GO:0007568 GO:0008361 GO:0009855 GO:0009926 GO:0009933 GO:0009944 GO:0009956 GO:0010014 GO:0010015 GO:0010051 GO:0010073 GO:0010075 GO:0010305 GO:0019344 GO:0040007	aging; "auxin polar transport"; "cysteine biosynthetic process"; "determi-tion of bilateral symmetry"; "growth"; "leaf vascular tissue pattern formation"; "meristem initiation"; "meristem mainte-nce"; "meristem structural organization"; "pattern specification process"; "polarity specification of adaxial/abaxial axis"; "radial pattern formation"; "regulation of cell size"; "regulation of meristem …	GO:0003674	molecular function	GO:0005886 GO:0009506 GO:0016021	integral to membrane; "plasma membrane"; "plasmodesma"	1.81238	1.77452	0.835927	1.06292	-0.639723	-0.986998	-0.891919	-0.91204	0.618643
Glyma.01G096000	Glyma01g11390	PLATZ	I0B672_GOSHI	7e-121	AT4G17900.1	3e-106	PLATZ transcription factor family protein	GO:0008150	biological process	-	-	GO:0005739	mitochondrion	10.7461	12.8902	12.8225	14.0986	14.8325	15.2836	15.3329	15.3714	15.174
Glyma.01G096700	Glyma01g12840	Granule-bound starch synthase (Fragment)	D2E850_9LAMI	6e-09	AT1G32900.1	6e-08	UDP-Glycosyltransferase superfamily protein	GO:0001666 GO:0009058 GO:0009250 GO:0010264 GO:0019375	biosynthetic process; "galactolipid biosynthetic process"; "glucan biosynthetic process"; "myo-inositol hexakisphosphate biosynthetic process"; "response to hypoxia"	GO:0005515 GO:0009011 GO:0016757	protein binding; "starch synthase activity"; "transferase activity, transferring glycosyl groups"	GO:0009507	chloroplast	3.96565	3.98284	3.63345	3.02942	1.34225	1.63411	1.8797	1.97628	2.10438
Glyma.01G096800	Glyma01g12940	Hydroxyproline-rich glycoprotein	U5GUQ9_POPTR	5e-63	AT2G35230.1	5e-31	VQ motif-containing protein	GO:0009960 GO:0030048 GO:0051645 GO:0051646 GO:0060151 GO:0080113	Golgi localization; "actin filament-based movement"; "endosperm development"; "mitochondrion localization"; "peroxisome localization"; "regulation of seed growth"	GO:0003674	molecular function	GO:0005634 GO:0043078	nucleus; "polar nucleus"	4.56976	4.50839	4.83682	3.92232	2.19631	2.23596	1.92155	1.98553	0.55635
Glyma.01G097400	Glyma01g23790	Phosphoenolpyruvate carboxykinase	Q94LX7_FLAPR	0	AT4G37870.1	0	phosphoenolpyruvate carboxykinase 1	GO:0006094 GO:0009817 GO:0016036 GO:0046686	cellular response to phosphate starvation; "defense response to fungus, incompatible interaction"; "gluconeogenesis"; "response to cadmium ion"	GO:0004611 GO:0004612 GO:0005524 GO:0017076	ATP binding; "phosphoenolpyruvate carboxyki-se (ATP) activity"; "phosphoenolpyruvate carboxyki-se activity"; "purine nucleotide binding"	GO:0005634 GO:0005730 GO:0005737 GO:0005829 GO:0016020	cytoplasm; "cytosol"; "membrane"; "nucleolus"; "nucleus"	4.19841	7.33224	6.52756	7.07349	4.71877	3.87558	1.00604	1.00061	0.55635
Glyma.01G097900	Glyma01g23870	Zinc finger protein	G7LHS8_MEDTR	0	AT2G22680.1	1e-147	Zinc finger (C3HC4-type RING finger) family protein	GO:0009062 GO:0009690 GO:0016132	brassinosteroid biosynthetic process; "cytokinin metabolic process"; "fatty acid catabolic process"	GO:0004842 GO:0008270	ubiquitin-protein ligase activity; "zinc ion binding"	GO:0005576	extracellular region	3.10263	2.63151	2.6651	1.02941	-0.639723	NA	NA	NA	NA
Glyma.01G098000	Glyma01g24100	Auxin-induced protein	K7K2W3_SOYBN	0	AT5G65670.2	2e-142	indole-3-acetic acid inducible 9	GO:0006355 GO:0009616 GO:0009733 GO:0009734 GO:0010050 GO:0010583	auxin mediated sig-ling pathway; "regulation of transcription, D--dependent"; "response to auxin stimulus"; "response to cyclopentenone"; "vegetative phase change"; "virus induced gene silencing"	GO:0003700 GO:0046983	protein dimerization activity; "sequence-specific D- binding transcription factor activity"	GO:0005634	nucleus	9.96375	9.84496	9.88667	9.13735	7.01543	6.98608	7.4198	7.31015	7.48661
Glyma.01G098100	#N/A	-	-	-	-	-	-	-	-	-	-	-	-	2.20805	1.33317	1.27462	1.36262	NA	NA	NA	NA	-0.927841
Glyma.01G098400	Glyma01g24150	Protein kinase	C6ZRU1_SOYBN	0	AT2G28930.3	0	protein kinase 1B	GO:0006468 GO:0006499	N-termi-l protein myristoylation; "protein phosphorylation"	GO:0004672 GO:0004674 GO:0004713 GO:0005524 GO:0016301 GO:0016772	ATP binding; "ki-se activity"; "protein ki-se activity"; "protein serine/threonine ki-se activity"; "protein tyrosine ki-se activity"; "transferase activity, transferring phosphorus-containing groups"	GO:0005886 GO:0009507	chloroplast; "plasma membrane"	5.56933	3.21755	2.84501	0.0555561	-1.35736	-1.01334	-1.10717	-1.08887	NA
Glyma.01G098500	Glyma01g24160	-	-	-	-	-	-	-	-	-	-	-	-	1.55547	2.39968	-1.15491	2.28731	-0.639723	-0.00299611	0.632741	0.608358	-0.0798389
Glyma.01G098700	Glyma01g24360	Catalytic/ hydrolase	K7WEQ0_MAIZE	7e-138	AT5G02230.2	5e-137	Haloacid dehalogenase-like hydrolase (HAD) superfamily protein	GO:0008152	metabolic process	GO:0003824 GO:0016787	catalytic activity; "hydrolase activity"	-	-	6.02101	7.02828	7.06433	5.64981	0.844749	2.8612	3.76128	3.74789	4.07097
Glyma.01G099000	#N/A	Acyl-CoA oxidase 4	J7K895_PRUPE	2e-33	AT3G51840.1	1e-32	acyl-CoA oxidase 4	GO:0006623 GO:0006635 GO:0007030 GO:0007033 GO:0008152 GO:0009793 GO:0016192 GO:0016558 GO:0044265 GO:0046459 GO:0055114	Golgi organization; "cellular macromolecule catabolic process"; "embryo development ending in seed dormancy"; "fatty acid beta-oxidation"; "metabolic process"; "oxidation-reduction process"; "protein import into peroxisome matrix"; "protein targeting to vacuole"; "short-chain fatty acid metabolic process"; "vacuole organization"; "vesicle-mediated transport"	GO:0003995 GO:0003997 GO:0016491 GO:0016627 GO:0050660	acyl-CoA dehydroge-se activity; "acyl-CoA oxidase activity"; "flavin adenine dinucleotide binding"; "oxidoreductase activity"; "oxidoreductase activity, acting on the CH-CH group of donors"	GO:0005739 GO:0005777	mitochondrion; "peroxisome"	1.19771	0.49305	1.2274	-0.47091	NA	NA	-1.10717	-1.08887	NA
Glyma.01G099800	Glyma01g24530	VuP5CS protein	Q9AYM4_VIGUN	0	AT3G55610.1	0	delta 1-pyrroline-5-carboxylate synthase 2	GO:0006561 GO:0009555 GO:0009737 GO:0009793 GO:0042538	embryo development ending in seed dormancy; "hyperosmotic salinity response"; "pollen development"; "proline biosynthetic process"; "response to abscisic acid stimulus"	GO:0003824 GO:0004349 GO:0004350 GO:0016491 GO:0016620	catalytic activity; "glutamate-5-semialdehyde dehydroge-se activity"; "glutamate 5-ki-se activity"; "oxidoreductase activity"; "oxidoreductase activity, acting on the aldehyde or oxo group of donors, -D or -DP as acceptor"	GO:0005737 GO:0005739 GO:0005829 GO:0009506 GO:0009507	chloroplast; "cytoplasm"; "cytosol"; "mitochondrion"; "plasmodesma"	5.53584	5.0027	4.91022	4.30503	3.32766	2.9154	2.98302	2.99906	2.41992
Glyma.01G101600	Glyma01g24811	NAD(P)H-quinone oxidoreductase subunit 2, chloroplastic	K9L3B9_VACMA	3e-23	ATCG01250.1	7e-22	NADH-Ubiquinone/plastoquinone (complex I) protein	GO:0042773 GO:0055114	ATP synthesis coupled electron transport; "oxidation-reduction process"	GO:0008137	-DH dehydroge-se (ubiquinone) activity	GO:0009507	chloroplast	2.33695	3.46108	3.11806	4.91387	5.14961	6.34147	4.47438	4.77159	4.03518
Glyma.01G101700	#N/A	-	-	-	AT2G01050.1	2e-12	zinc ion binding;nucleic acid binding	GO:0008150	biological process	GO:0003676 GO:0008270	nucleic acid binding; "zinc ion binding"	GO:0005634	nucleus	-0.469402	-1.00977	-0.0156059	-0.47091	1.88607	2.88602	2.52664	2.58394	3.00377
Glyma.01G101800	Glyma01g24820	C2H2-type zinc finger protein-like protein	G7JTD7_MEDTR	1e-86	AT2G37740.1	6e-25	zinc-finger protein 10	GO:0006355	regulation of transcription, D--dependent	GO:0003676 GO:0003700 GO:0008270	nucleic acid binding; "sequence-specific D- binding transcription factor activity"; "zinc ion binding"	GO:0005622 GO:0005634	intracellular; "nucleus"	1.57884	1.8529	0.498864	0.774788	-1.35736	-1.01334	NA	NA	NA
Glyma.01G102300	Glyma01g24880	Legume-specific protein	K9N5V5_9FABA	4e-30	AT5G02090.1	5e-11	unknown protein; Has 30 Blast hits to 30 proteins in 10 species: Archae - 0; Bacteria - 0; Metazoa - 0; Fungi - 0; Plants - 30; Viruses - 0; Other Eukaryotes - 0 (source: NCBI BLink).	GO:0008150	biological process	GO:0003674	molecular function	GO:0005739	mitochondrion	6.26632	10.2002	10.533	8.56738	7.99168	6.9734	7.71633	7.93768	7.53928
Glyma.01G102400	Glyma01g24900	CASP-like protein 13	CSPLI_MAIZE	3e-57	AT3G53850.1	2e-78	Uncharacterised protein family (UPF0497)	GO:0008150	biological process	GO:0003674	molecular function	-	-	7.98454	6.45138	6.43156	5.84816	3.67735	4.06784	4.48414	4.44138	4.59597
Glyma.01G102700	Glyma01g24945	-	-	-	-	-	-	-	-	-	-	-	-	2.62126	3.15564	3.02853	4.87299	4.39746	5.62368	6.10984	6.22541	5.63992
Glyma.01G102800	#N/A	-	-	-	-	-	-	-	-	-	-	-	-	2.88844	2.41286	2.60255	1.275	-1.35736	-1.01334	NA	NA	NA
Glyma.01G102900	Glyma01g25000	Oxidoreductase	D7LKP8_ARALL	0	AT2G37770.2	0	NAD(P)-linked oxidoreductase superfamily protein	GO:0009409 GO:0009414 GO:0009651 GO:0055114	oxidation-reduction process; "response to cold"; "response to salt stress"; "response to water deprivation"	GO:0004033 GO:0008106 GO:0016229 GO:0016491 GO:0070401	-DP+ binding; "alcohol dehydroge-se (-DP+) activity"; "aldo-keto reductase (-DP) activity"; "oxidoreductase activity"; "steroid dehydroge-se activity"	GO:0005737 GO:0009507	chloroplast; "cytoplasm"	3.2183	2.24514	1.52153	0.0555561	NA	NA	-1.10717	-1.08887	NA
Glyma.01G103500	Glyma01g25270	Auxin response factor	K7K310_SOYBN	0	AT4G23980.1	0	auxin response factor 9	GO:0006355 GO:0009725	regulation of transcription, D--dependent; "response to hormone stimulus"	GO:0003700 GO:0005515	protein binding; "sequence-specific D- binding transcription factor activity"	GO:0005634	nucleus	7.67527	5.64732	5.64679	4.26848	4.34979	4.87094	4.67314	4.66682	4.56195
Glyma.01G104000	#N/A	-	-	-	-	-	-	-	-	-	-	-	-	1.40925	0.884272	0.372821	-1.52331	NA	NA	NA	NA	NA
Glyma.01G104100	Glyma01g25690	Isochorismate synthase	G7JQL8_MEDTR	0	AT1G18870.1	0	isochorismate synthase 2	GO:0009058 GO:0042372	biosynthetic process; "phylloquinone biosynthetic process"	GO:0008909	isochorismate synthase activity	GO:0009507 GO:0009536	chloroplast; "plastid"	5.33108	3.83142	3.83553	1.73508	NA	NA	NA	NA	NA
Glyma.01G104600	Glyma01g25782	-	-	-	AT3G56870.1	1e-36	unknown protein; Has 204 Blast hits to 201 proteins in 58 species: Archae - 0; Bacteria - 10; Metazoa - 72; Fungi - 8; Plants - 41; Viruses - 0; Other Eukaryotes - 73 (source: NCBI BLink).	GO:0006275 GO:0006346 GO:0008150 GO:0009909 GO:0010389 GO:0016458 GO:0031048 GO:0034968 GO:0051567	biological process; "chromatin silencing by small R-"; "gene silencing"; "histone H3-K9 methylation"; "histone lysine methylation"; "methylation-dependent chromatin silencing"; "regulation of D- replication"; "regulation of G2/M transition of mitotic cell cycle"; "regulation of flower development"	GO:0003674	molecular function	GO:0005634	nucleus	3.03238	2.94924	2.05916	2.57772	0.844749	0.602284	-0.114753	-0.081287	-0.927841
Glyma.01G104800	Glyma01g25830	Glyoxal oxidase	C8CPQ3_VITVI	0	AT3G53950.1	0	glyoxal oxidase-related protein	GO:0008150	biological process	GO:0003674	molecular function	GO:0005576	extracellular region	10.4599	8.8237	8.78923	7.63523	5.43333	5.70869	6.13096	5.97632	5.46136
Glyma.01G105000	Glyma01g25890	Peptide transporter PTR3-B	G7L5K4_MEDTR	0	AT2G37900.1	0	Major facilitator superfamily protein	GO:0006857	oligopeptide transport	GO:0005215	transporter activity	GO:0005886 GO:0016020	membrane; "plasma membrane"	3.80794	1.88281	1.783	NA	NA	NA	NA	NA	NA
Glyma.01G105100	Glyma01g25903	-	-	-	-	-	-	-	-	-	-	-	-	0.0674245	-0.0206707	-1.15491	-1.52331	1.93451	1.33261	1.29906	1.31204	1.00311
Glyma.01G105200	#N/A	Gibberellin 2-oxidase	Q4W8C3_PHAAN	3e-45	AT1G78440.1	4e-29	Arabidopsis thaliana gibberellin 2-oxidase 1	GO:0045487 GO:0055114	gibberellin catabolic process; "oxidation-reduction process"	GO:0005506 GO:0016491 GO:0016706 GO:0052634	C-19 gibberellin 2-beta-dioxyge-se activity; "iron ion binding"; "oxidoreductase activity"; "oxidoreductase activity, acting on paired donors, with incorporation or reduction of molecular oxygen, 2-oxoglutarate as one donor, and incorporation of one atom each of oxygen into both donors"	GO:0005737	cytoplasm	7.83098	5.13698	4.89295	2.46843	NA	-0.986998	-0.891919	-0.91204	-1.07126
Glyma.01G105400	Glyma01g25930	-	-	-	-	-	-	-	-	-	-	-	-	2.58128	4.65679	3.68786	4.82647	4.4228	4.97861	5.78276	6.04943	5.56252
Glyma.01G106000	Glyma01g26220	Tau class glutathione S-transferase	K9M8M1_GLYSO	4e-154	AT3G09270.1	2e-88	glutathione S-transferase TAU 8	GO:0006635 GO:0009407 GO:0010583 GO:0043161 GO:0046686 GO:0051788 GO:0080129	fatty acid beta-oxidation; "proteasomal ubiquitin-dependent protein catabolic process"; "proteasome core complex assembly"; "response to cadmium ion"; "response to cyclopentenone"; "response to misfolded protein"; "toxin catabolic process"	GO:0004364	glutathione transferase activity	GO:0005737	cytoplasm	8.45624	7.37386	7.19294	6.66592	3.03873	2.07389	2.55749	2.45566	2.39033
Glyma.01G106200	Glyma01g26300	Universal stress protein family protein	D7LUP3_ARALL	3e-85	AT3G53990.1	8e-89	Adenine nucleotide alpha hydrolases-like superfamily protein	GO:0009409	response to cold	GO:0003674	molecular function	GO:0005737 GO:0005886 GO:0009506	cytoplasm; "plasma membrane"; "plasmodesma"	9.95338	9.2429	9.14359	7.65195	4.42192	5.67665	6.89479	6.54828	6.82193
Glyma.01G106700	Glyma01g26360	Copper transporter family protein	B9HPB1_POPTR	1e-33	AT2G26975.1	2e-30	Ctr copper transporter family	GO:0006825 GO:0035434	copper ion transmembrane transport; "copper ion transport"	GO:0005375	copper ion transmembrane transporter activity	GO:0005773 GO:0016021	integral to membrane; "vacuole"	6.259	3.65092	3.87734	1.84318	0.929377	2.44083	2.36934	2.32006	2.4501
Glyma.01G106800	Glyma01g26570	HSP18.1B	H6TB47_CITLA	7e-64	AT1G53540.1	1e-21	HSP20-like chaperones superfamily protein	GO:0009733	response to auxin stimulus	GO:0003674	molecular function	-	-	1.56076	1.2311	0.835927	0.5	4.1054	5.55611	5.85955	5.56348	5.38652
Glyma.01G107000	Glyma01g26590	Gb|AAC95187.1	Q9FGU9_ARATH	8e-57	AT5G01030.2	2e-67	Protein of unknown function (DUF3527)	GO:0008150	biological process	GO:0003674	molecular function	GO:0005634	nucleus	6.79655	3.8902	3.93167	1.5	1.1166	1.35684	0.0047454	0.00190919	0.00225974
Glyma.01G107500	Glyma01g26650	R2R3-MYB transcription factor (Fragment)	E5RT69_LUPAL	9e-158	AT3G09230.1	3e-107	myb domain protein 1	GO:0006355 GO:0009751	regulation of transcription, D--dependent; "response to salicylic acid stimulus"	GO:0003677 GO:0003700	D- binding; "sequence-specific D- binding transcription factor activity"	GO:0005634	nucleus	6.38962	5.31567	5.11152	4.16532	1.80815	2.52372	2.93453	2.89893	2.5331
Glyma.01G107700	Glyma01g26670	Zinc finger family protein	B9HHJ5_POPTR	5e-64	AT5G05830.1	5e-63	RING/FYVE/PHD zinc finger superfamily protein	-	-	GO:0008270	zinc ion binding	GO:0005634	nucleus	2.7482	1.38735	1.56186	-0.47091	NA	NA	NA	NA	NA
Glyma.01G107900	Glyma01g26690	Kinase family protein	B9IG10_POPTR	0	AT3G54030.1	0	Protein kinase protein with tetratricopeptide repeat domain	GO:0006468 GO:0006499	N-termi-l protein myristoylation; "protein phosphorylation"	GO:0004672 GO:0005524 GO:0016301 GO:0016772	ATP binding; "ki-se activity"; "protein ki-se activity"; "transferase activity, transferring phosphorus-containing groups"	GO:0005886	plasma membrane	6.61491	5.60828	5.66394	4.16517	1.64659	1.33261	1.53995	1.57063	2.07328
Glyma.01G108700	Glyma01g26840	NtEIG-E80 protein	Q9FXS6_TOBAC	2e-73	AT3G54040.1	8e-67	PAR1 protein	GO:0000041 GO:0008150	biological process; "transition metal ion transport"	GO:0003674	molecular function	GO:0009507	chloroplast	6.05634	5.46274	6.42409	3.91002	0.376098	NA	-1.10717	-1.08887	0.0814936
Glyma.01G108800	Glyma01g26860	-	-	-	AT3G54060.2	6e-46	unknown protein; BEST Arabidopsis thaliana protein match is: unknown protein (TAIR:AT2G37960.2); Has 35333 Blast hits to 34131 proteins in 2444 species: Archae - 798; Bacteria - 22429; Metazoa - 974; Fungi - 991; Plants - 531; Viruses - 0; Other Eukaryotes - 9610 (source: NCBI BLink).	GO:0008150	biological process	GO:0003674	molecular function	GO:0005634	nucleus	-0.53121	0.0103776	1.24597	2.96943	3.8592	3.83418	3.60058	3.65437	3.83831
Glyma.01G108900	#N/A	-	-	-	AT2G37960.2	2e-47	unknown protein; FUNCTIONS IN: molecular_function unknown; INVOLVED IN: biological_process unknown; LOCATED IN: cellular_component unknown; BEST Arabidopsis thaliana protein match is: unknown protein (TAIR:AT3G54060.2); Has 30201 Blast hits to 17322 proteins in 780 species: Archae - 12; Bacteria - 1396; Metazoa - 17338; Fungi - 3422; Plants - 5037; Viruses - 0; Other Eukaryotes - 2996 (source: NC…	GO:0008150	biological process	GO:0003674	molecular function	GO:0005634	nucleus	-0.53121	0.0103776	1.24597	-0.52691	2.87687	3.28208	3.01284	2.99381	3.00756
Glyma.01G109600	Glyma01g26981	-	-	-	AT2G37975.1	4e-36	Yos1-like protein	GO:0008150	biological process	GO:0003674	molecular function	GO:0005739	mitochondrion	9.04707	6.26437	6.03947	3.77823	2.49099	3.20039	3.17158	3.067	3.03249
Glyma.01G109800	Glyma01g27005	DUF246 domain-containing protein	G7JS84_MEDTR	0	AT3G54100.1	0	O-fucosyltransferase family protein	GO:0008150 GO:0030968	biological process; "endoplasmic reticulum unfolded protein response"	GO:0016757	transferase activity, transferring glycosyl groups	GO:0005794	Golgi apparatus	8.48128	9.41828	8.77988	8.17622	6.0041	6.46093	6.5749	6.63912	6.43566
Glyma.01G110200	Glyma01g27060	UDP-N-acetylglucosamine/UDP-glucose/GDP-mannose transporter	G7IES6_MEDTR	0	AT1G76340.1	0	golgi nucleotide sugar transporter 3	GO:0015780	nucleotide-sugar transport	-	-	GO:0005886 GO:0016020	membrane; "plasma membrane"	6.84306	5.36114	5.19631	3.85847	2.90332	1.02081	1.23988	1.29073	0.00225974
Glyma.01G111100	#N/A	Clathrin adaptor complexes medium subunit family protein	B9GN34_POPTR	5e-21	AT4G24550.1	3e-23	Clathrin adaptor complexes medium subunit family protein	GO:0006623 GO:0006810 GO:0006886 GO:0016192	intracellular protein transport; "protein targeting to vacuole"; "transport"; "vesicle-mediated transport"	-	-	GO:0005622 GO:0005634 GO:0005829 GO:0030125	clathrin vesicle coat; "cytosol"; "intracellular"; "nucleus"	1.2835	1.30218	0.974578	0.810636	-1.35736	-1.01334	-1.10717	-1.08887	-0.927841
Glyma.01G112300	Glyma01g27455	TIR-NBS-LRR RCT1-like resistance protein	G7JLX5_MEDTR	0	AT5G36930.2	0	Disease resistance protein (TIR-NBS-LRR class) family	GO:0006952 GO:0007165	defense response; "sig-l transduction"	GO:0043531	ADP binding	GO:0005622 GO:0005737	cytoplasm; "intracellular"	5.30351	3.95791	3.90572	1.98373	-0.362116	1.76354	2.33154	2.31897	1.21926
Glyma.01G113200	Glyma01g27900	ER glycerol-phosphate acyltransferase	G7L6J6_MEDTR	0	AT2G38110.1	0	glycerol-3-phosphate acyltransferase 6	GO:0006655 GO:0008152 GO:0009908 GO:0010143	cutin biosynthetic process; "flower development"; "metabolic process"; "phosphatidylglycerol biosynthetic process"	GO:0016746 GO:0016791 GO:0090447	glycerol-3-phosphate 2-O-acyltransferase activity; "phosphatase activity"; "transferase activity, transferring acyl groups"	GO:0005739	mitochondrion	1.40925	0.884272	0.372821	-1.52331	-1.35736	-1.01334	NA	NA	-0.927841
Glyma.01G113400	Glyma01g27970	Plasma intrinsic protein 1;3	C5IX22_9ROSI	2e-177	AT2G45960.1	7e-175	plasma membrane intrinsic protein 1B	GO:0006096 GO:0006810 GO:0006833 GO:0006972 GO:0007030 GO:0009266 GO:0009414 GO:0009651 GO:0015670 GO:0032880 GO:0046686 GO:0055085	Golgi organization; "carbon dioxide transport"; "glycolysis"; "hyperosmotic response"; "regulation of protein localization"; "response to cadmium ion"; "response to salt stress"; "response to temperature stimulus"; "response to water deprivation"; "transmembrane transport"; "transport"; "water transport"	GO:0005215 GO:0015250	transporter activity; "water channel activity"	GO:0005773 GO:0005886 GO:0009507 GO:0016020 GO:0016021 GO:0046658	anchored to plasma membrane; "chloroplast"; "integral to membrane"; "membrane"; "plasma membrane"; "vacuole"	1.44489	2.18698	1.81947	2.6169	NA	NA	-1.10717	-1.08887	0.0814936
Glyma.01G114000	#N/A	Auxin transporter-like protein 2	LAX2_MEDTR	0	AT2G38120.1	0	Transmembrane amino acid transporter family protein	GO:0000271 GO:0001736 GO:0006865 GO:0006949 GO:0007155 GO:0007389 GO:0008361 GO:0009624 GO:0009723 GO:0009733 GO:0009825 GO:0009926 GO:0009932 GO:0009958 GO:0010015 GO:0010090 GO:0010218 GO:0010311 GO:0010817 GO:0040007 GO:0043481 GO:0045010 GO:0048765 GO:0048767 GO:0048829 GO:0071555	actin nucleation; "amino acid transport"; "anthocyanin accumulation in tissues in response to UV light"; "auxin polar transport"; "cell adhesion"; "cell tip growth"; "cell wall organization"; "establishment of pla-r polarity"; "growth"; "lateral root formation"; "multidimensio-l cell growth"; "pattern specification process"; "polysaccharide biosynthetic process"; "positive gravitropism"; "regulat…	GO:0005215 GO:0010011 GO:0010328 GO:0015171	amino acid transmembrane transporter activity; "auxin binding"; "auxin influx transmembrane transporter activity"; "transporter activity"	GO:0005768 GO:0005794 GO:0005886 GO:0009986 GO:0016020	Golgi apparatus; "cell surface"; "endosome"; "membrane"; "plasma membrane"	2.45457	1.23619	1.12782	NA	NA	-0.986998	-0.891919	-0.91204	0.00225974
Glyma.01G114300	Glyma01g28396	Hypothetical chloroplast RF1	R9ZQS2_9FABA	3e-44	ATMG00370.1	3e-41	Ycf1 protein	-	-	-	-	GO:0005739	mitochondrion	3.49778	5.0394	3.73958	6.1565	4.97719	5.90105	3.07222	3.18595	3.36042
Glyma.01G114400	Glyma01g28440	Otubain	G7JN13_MEDTR	2e-114	AT4G31980.1	3e-36	unknown protein; CONTAINS InterPro DOMAIN/s: Protein of unknown function DUF247, plant (InterPro:IPR004158), Protein of unknown function DUF862, eukaryotic (InterPro:IPR008580); BEST Arabidopsis thaliana protein match is: Plant protein of unknown function (DUF247) (TAIR:AT5G11290.1); Has 1967 Blast hits to 1844 proteins in 183 species: Archae - 0; Bacteria - 6; Metazoa - 223; Fungi - 83; Plants -…	GO:0006865 GO:0008150	amino acid transport; "biological process"	GO:0003674	molecular function	GO:0005886	plasma membrane	7.37599	4.03374	3.96632	2.0121	1.93451	1.33261	1.29906	1.31204	0.55635
Glyma.01G114900	Glyma01g28511	Lactosylceramide 4-alpha-galactosyltransferase	G7KRB0_MEDTR	2e-151	AT2G38150.1	4e-104	alpha 1,4-glycosyltransferase family protein	-	-	GO:0008378 GO:0016740 GO:0016757	galactosyltransferase activity; "transferase activity"; "transferase activity, transferring glycosyl groups"	GO:0005794 GO:0005795	Golgi apparatus; "Golgi stack"	-1.49729	-1.02355	NA	0.0969565	4.8476	5.85901	5.25956	5.14012	5.30693
Glyma.01G115000	Glyma01g28520	Alpha-amylase	G7JN22_MEDTR	1e-161	AT5G01260.1	2e-39	Carbohydrate-binding-like fold	GO:0005975 GO:0010264	carbohydrate metabolic process; "myo-inositol hexakisphosphate biosynthetic process"	GO:0003824 GO:0030246 GO:2001070	carbohydrate binding; "catalytic activity"; "starch binding"	GO:0005576	extracellular region	11.332	13.1342	13.1546	12.8525	10.6298	10.051	11.0173	11.0352	11.0773
Glyma.01G115600	Glyma01g28780	Otubain	G7JN13_MEDTR	1e-32	AT3G50120.1	5e-24	Plant protein of unknown function (DUF247)	GO:0008150	biological process	GO:0003674	molecular function	GO:0005886	plasma membrane	1.81238	1.77452	1.2274	0.46158	NA	NA	NA	NA	-0.927841
Glyma.01G116500	#N/A	Alcohol dehydrogenase-like protein	G7KS95_MEDTR	5e-58	AT1G64710.1	5e-54	GroES-like zinc-binding dehydrogenase family protein	GO:0009873 GO:0055114	ethylene mediated sig-ling pathway; "oxidation-reduction process"	GO:0000166 GO:0008270 GO:0016491	nucleotide binding; "oxidoreductase activity"; "zinc ion binding"	GO:0005737	cytoplasm	0.872335	1.77676	0.171962	2.3276	-0.639723	NA	-1.10717	-1.08887	0.0814936
Glyma.01G116700	Glyma01g28880	Alcohol dehydrogenase-like protein	G7KS94_MEDTR	0	AT1G32780.1	0	GroES-like zinc-binding dehydrogenase family protein	GO:0055114	oxidation-reduction process	GO:0000166 GO:0008270 GO:0016491	nucleotide binding; "oxidoreductase activity"; "zinc ion binding"	GO:0005737	cytoplasm	1.8383	3.64087	3.12065	4.34862	1.24486	1.53107	3.07222	3.18595	2.48035
Glyma.01G117000	Glyma01g28936	Receptor-like protein kinase	G7JQ72_MEDTR	0	AT1G45616.1	1e-132	receptor like protein 6	GO:0002237 GO:0006952 GO:0007165 GO:0010103 GO:0048443	defense response; "response to molecule of bacterial origin"; "sig-l transduction"; "stamen development"; "stomatal complex morphogenesis"	-	-	GO:0016020	membrane	1.70668	0.814154	1.42406	-0.47091	NA	-0.986998	-0.891919	-0.91204	-1.07126
Glyma.01G117200	Glyma01g29030	Receptor-like protein kinase	G7JQ72_MEDTR	0	AT1G45616.1	1e-133	receptor like protein 6	GO:0002237 GO:0006952 GO:0007165 GO:0010103 GO:0048443	defense response; "response to molecule of bacterial origin"; "sig-l transduction"; "stamen development"; "stomatal complex morphogenesis"	-	-	GO:0016020	membrane	3.37403	4.01758	3.85063	3.36082	-1.35736	-1.01334	NA	NA	-0.927841
Glyma.01G118200	Glyma01g29280	Nuclear matrix protein	G7JWZ8_MEDTR	0	AT5G17620.1	0	CONTAINS InterPro DOMAIN/s: Plant nuclear matrix 1 (InterPro:IPR010604); Has 30201 Blast hits to 17322 proteins in 780 species: Archae - 12; Bacteria - 1396; Metazoa - 17338; Fungi - 3422; Plants - 5037; Viruses - 0; Other Eukaryotes - 2996 (source: NCBI BLink).	GO:0008150	biological process	GO:0005515 GO:0051011	microtubule minus-end binding; "protein binding"	GO:0005876 GO:0009524	phragmoplast; "spindle microtubule"	6.50972	4.8748	4.77529	3.50422	2.73748	3.2879	3.52727	3.51798	3.30704
Glyma.01G119000	Glyma01g29394	-	-	-	-	-	-	-	-	-	-	-	-	4.43907	4.77546	4.08109	4.08334	1.93451	0.602284	1.1857	1.26212	1.42795
Glyma.01G119100	#N/A	-	-	-	-	-	-	-	-	-	-	-	-	3.52205	3.76253	3.43351	3.19313	1.0549	1.55591	1.83869	1.81051	2.0047
Glyma.01G119300	Glyma01g29410	RAN BINDING protein 1	B9HND6_POPTR	7e-97	AT5G58590.1	2e-94	RAN binding protein 1	GO:0000060 GO:0000278 GO:0006396 GO:0006406 GO:0006606	R- processing; "mR- export from nucleus"; "mitotic cell cycle"; "protein import into nucleus"; "protein import into nucleus, translocation"	GO:0005515	protein binding	GO:0005634	nucleus	7.01906	6.00911	5.89609	5.06823	2.40399	3.55091	3.57707	3.50212	3.34344
Glyma.01G120400	Glyma01g29630	Fatty acid desaturase 8	B8XJZ1_SOYBN	0	AT5G05580.1	0	fatty acid desaturase 8	GO:0006629 GO:0006633 GO:0009266 GO:0055114	fatty acid biosynthetic process; "lipid metabolic process"; "oxidation-reduction process"; "response to temperature stimulus"	GO:0016717 GO:0042389	omega-3 fatty acid desaturase activity; "oxidoreductase activity, acting on paired donors, with oxidation of a pair of donors resulting in the reduction of molecular oxygen to two molecules of water"	GO:0009507 GO:0009941	chloroplast; "chloroplast envelope"	7.13359	6.04201	5.85601	4.48691	2.06797	2.15212	2.66201	2.7	2.1584
Glyma.01G120800	Glyma01g29670	ALC-interacting protein 1	Q9M035_ARATH	2e-10	AT5G01370.1	2e-13	ALC-interacting protein 1	GO:0010047	fruit dehiscence	GO:0005515	protein binding	GO:0005634	nucleus	7.99617	5.21245	4.9702	2.9598	-0.362116	1.30728	2.25524	2.31589	2.53898
Glyma.01G121200	Glyma01g29873	BCL-2 associated athanogene 6A	U3LTJ1_SOYBN	0	-	-	-	-	-	-	-	-	-	6.41138	3.41981	3.02536	-0.52691	0.503705	2.75772	3.62612	3.56672	3.90022
Glyma.01G121300	Glyma01g30300	Chaperone protein dnaJ	G8A2L9_MEDTR	0	AT3G08910.1	3e-177	DNAJ heat shock family protein	GO:0006457	protein folding	GO:0031072 GO:0051082	heat shock protein binding; "unfolded protein binding"	GO:0005737	cytoplasm	7.56278	6.14614	6.15091	4.70208	3.79631	3.69989	3.77564	3.88558	3.8999
Glyma.01G122800	Glyma01g30610	Vacuolar cation/proton exchanger	G7JP46_MEDTR	0	AT3G51860.1	0	cation exchanger 3	GO:0006793 GO:0006812 GO:0006814 GO:0006816 GO:0006874 GO:0006882 GO:0009624 GO:0010351 GO:0030026 GO:0051592 GO:0055062 GO:0055085	calcium ion transport; "cation transport"; "cellular calcium ion homeostasis"; "cellular manganese ion homeostasis"; "cellular zinc ion homeostasis"; "lithium ion transport"; "phosphate ion homeostasis"; "phosphorus metabolic process"; "response to calcium ion"; "response to nematode"; "sodium ion transport"; "transmembrane transport"	GO:0005515 GO:0008324 GO:0015368 GO:0015369 GO:0015491	calcium:cation antiporter activity; "calcium:hydrogen antiporter activity"; "cation:cation antiporter activity"; "cation transmembrane transporter activity"; "protein binding"	GO:0005773 GO:0005774 GO:0009705 GO:0016021	integral to membrane; "plant-type vacuole membrane"; "vacuolar membrane"; "vacuole"	7.09466	5.25956	5.52114	3.06569	0.376098	NA	-1.10717	-1.08887	-0.927841
Glyma.01G123000	Glyma01g30660	LAX	G7KSC0_MEDTR	3e-33	AT5G01310.1	5e-32	APRATAXIN-like	GO:0000278 GO:0006259 GO:0006310 GO:0006355 GO:0006396 GO:0006790 GO:0007062 GO:0007126 GO:0007131 GO:0009150 GO:0010332 GO:0010413 GO:0032204 GO:0033044 GO:0042138 GO:0043247 GO:0045132 GO:0045492	D- metabolic process; "D- recombi-tion"; "R- processing"; "glucuronoxylan metabolic process"; "meiosis"; "meiotic D- double-strand break formation"; "meiotic chromosome segregation"; "mitotic cell cycle"; "purine ribonucleotide metabolic process"; "reciprocal meiotic recombi-tion"; "regulation of chromosome organization"; "regulation of telomere mainte-nce"; "regulation of transcription, D--depen…	GO:0003700 GO:0003824 GO:0008270 GO:0047627	adenylylsulfatase activity; "catalytic activity"; "sequence-specific D- binding transcription factor activity"; "zinc ion binding"	GO:0005622 GO:0005634	intracellular; "nucleus"	-1.49729	-1.02355	NA	0.0969565	0.929377	1.36878	NA	NA	0.0814936
Glyma.01G123700	#N/A	-	-	-	AT1G71240.2	5e-14	Plant protein of unknown function (DUF639)	GO:0008150	biological process	GO:0003674	molecular function	GO:0005739	mitochondrion	3.02506	1.7368	1.6744	-1.52331	NA	NA	NA	NA	NA
Glyma.01G124500	Glyma01g31300	Ferritin	I1J7H3_SOYBN	0	AT5G01600.1	1e-110	ferretin 1	GO:0000302 GO:0006826 GO:0006879 GO:0009409 GO:0009617 GO:0009908 GO:0010039 GO:0010043 GO:0015979 GO:0042542 GO:0048366 GO:0055072 GO:0055114	cellular iron ion homeostasis; "flower development"; "iron ion homeostasis"; "iron ion transport"; "leaf development"; "oxidation-reduction process"; "photosynthesis"; "response to bacterium"; "response to cold"; "response to hydrogen peroxide"; "response to iron ion"; "response to reactive oxygen species"; "response to zinc ion"	GO:0005506 GO:0008199 GO:0016491 GO:0046914	ferric iron binding; "iron ion binding"; "oxidoreductase activity"; "transition metal ion binding"	GO:0005739 GO:0009507 GO:0009535 GO:0009570 GO:0009579 GO:0016020	chloroplast; "chloroplast stroma"; "chloroplast thylakoid membrane"; "membrane"; "mitochondrion"; "thylakoid"	11.9041	7.92366	7.72517	5.08974	3.01077	3.15029	2.95323	3.00407	2.9536
Glyma.01G124600	#N/A	Cp protein	Q70VA9_9CARY	1e-16	AT3G08890.2	1e-21	Protein of unknown function, DUF538	GO:0008150	biological process	GO:0003674	molecular function	GO:0005575	cellular component	7.40552	7.66897	7.78709	7.04485	5.0874	5.2545	5.91728	5.65967	5.60588
Glyma.01G125000	Glyma01g31370	-2 Isoform 2 of Protein trichome birefringence-like 35	Q8RXQ1-2	0	AT5G01620.3	0	TRICHOME BIREFRINGENCE-LIKE 35	-	-	-	-	-	-	7.12094	5.64343	5.49288	4.11151	3.98203	3.76825	3.27593	3.23687	2.73324
Glyma.01G125200	Glyma01g31480	Receptor protein kinase-like protein	G7KTA0_MEDTR	0	AT1G67510.1	0	Leucine-rich repeat protein kinase family protein	GO:0006468 GO:0007169	protein phosphorylation; "transmembrane receptor protein tyrosine ki-se sig-ling pathway"	GO:0004672 GO:0004674 GO:0005524 GO:0016301 GO:0016772	ATP binding; "ki-se activity"; "protein ki-se activity"; "protein serine/threonine ki-se activity"; "transferase activity, transferring phosphorus-containing groups"	GO:0005886	plasma membrane	0.850753	0.532757	0.974578	-1.52331	-1.35736	-1.01334	NA	NA	0.675164
Glyma.01G126200	Glyma01g31630	Macrophage migration inhibitory factor-like protein	G7KTA5_MEDTR	3e-61	AT3G51660.1	6e-45	Tautomerase/MIF superfamily protein	GO:0006569 GO:0006954 GO:0009684 GO:0051707	indoleacetic acid biosynthetic process; "inflammatory response"; "response to other organism"; "tryptophan catabolic process"	GO:0003674	molecular function	GO:0005777	peroxisome	3.9528	2.70673	1.91874	1.5	NA	NA	-1.10717	-1.08887	NA
Glyma.01G127200	Glyma01g31750	Disease resistance response protein	G7JKK5_MEDTR	1e-58	AT5G49040.1	3e-51	Disease resistance-responsive (dirigent-like protein) family protein	GO:0006952 GO:0009807	defense response; "lig-n biosynthetic process"	GO:0003674	molecular function	GO:0009507	chloroplast	6.01959	5.81767	6.51174	4.61155	2.45776	-0.00299611	1.00604	1.00061	1.8671
Glyma.01G127300	Glyma01g31801	PCD/DCoH-like protein 2	Q6QJ72_ARATH	4e-06	AT1G29810.1	4e-09	Transcriptional coactivator/pterin dehydratase	GO:0006729	tetrahydrobiopterin biosynthetic process	GO:0004160 GO:0008124	4-alpha-hydroxytetrahydrobiopterin dehydratase activity; "dihydroxy-acid dehydratase activity"	GO:0009507	chloroplast	1.69469	1.52199	2.29146	2.2723	-1.35736	-0.000621929	0.0047454	0.00190919	-1.07126
Glyma.01G127500	Glyma01g31840	SEC14 cytosolic factor family protein	B9IGK1_POPTR	0	AT3G51670.1	0	SEC14 cytosolic factor family protein / phosphoglyceride transfer family protein	GO:0006810	transport	GO:0005215	transporter activity	GO:0005886 GO:0016021	integral to membrane; "plasma membrane"	8.18105	8.90848	9.11875	8.05904	4.2736	4.54032	5.36212	5.23036	5.13318
Glyma.01G127600	Glyma01g31850	Phosphatase 2C family protein	A9PFS0_POPTR	3e-98	AT5G36250.1	3e-99	Protein phosphatase 2C family protein	GO:0006470	protein dephosphorylation	GO:0004721 GO:0004722 GO:0005515	phosphoprotein phosphatase activity; "protein binding"; "protein serine/threonine phosphatase activity"	GO:0005634 GO:0005739 GO:0005886	mitochondrion; "nucleus"; "plasma membrane"	4.18203	5.07303	5.20272	4.74729	1.24486	-0.000621929	-0.891919	-0.91204	0.00225974
Glyma.01G127900	Glyma01g31900	Methyltransferase	Q9M005_ARATH	0	AT5G01710.1	0	methyltransferases	GO:0006944 GO:0008152 GO:0048193	Golgi vesicle transport; "cellular membrane fusion"; "metabolic process"	GO:0008168	methyltransferase activity	-	-	7.30388	7.29512	7.57631	7.01658	4.16025	3.03981	3.69136	3.77387	2.95592
Glyma.01G128100	Glyma01g31921	WRKY transcription factor WRKY108715	B3U398_MEDTR	3e-177	AT2G38470.1	5e-102	WRKY DNA-binding protein 33	GO:0000165 GO:0002679 GO:0006355 GO:0006612 GO:0006944 GO:0006970 GO:0009408 GO:0009409 GO:0009414 GO:0009595 GO:0009651 GO:0009697 GO:0009862 GO:0009863 GO:0009867 GO:0010120 GO:0010200 GO:0010310 GO:0010363 GO:0010508 GO:0031348 GO:0034605 GO:0035556 GO:0042742 GO:0043069 GO:0043900 GO:0050832 GO:0070370	MAPK cascade; "camalexin biosynthetic process"; "cellular heat acclimation"; "cellular membrane fusion"; "cellular response to heat"; "defense response to bacterium"; "defense response to fungus"; "detection of biotic stimulus"; "intracellular sig-l transduction"; "jasmonic acid mediated sig-ling pathway"; "negative regulation of defense response"; "negative regulation of programmed cell death"; …	GO:0003700 GO:0005515	protein binding; "sequence-specific D- binding transcription factor activity"	GO:0005634	nucleus	9.06592	7.04453	7.3543	6.24799	5.14689	2.3466	2.52664	2.58394	2.19155
Glyma.01G128300	Glyma01g31940	Solute carrier family 40 member 1	S40A1_ARATH	0	AT2G38460.1	0	iron regulated 1	GO:0006824 GO:0034755	cobalt ion transport; "iron ion transmembrane transport"	GO:0005215 GO:0005381	iron ion transmembrane transporter activity; "transporter activity"	GO:0005886 GO:0016021	integral to membrane; "plasma membrane"	5.40628	3.41281	2.81887	0.774788	0.212256	1.58257	1.35783	1.33157	0.497073
Glyma.01G129100	Glyma01g32070	-	-	-	AT5G01750.2	2e-93	Protein of unknown function (DUF567)	GO:0006569 GO:0006995 GO:0008150 GO:0009684 GO:0030003 GO:0070838	biological process; "cellular cation homeostasis"; "cellular response to nitrogen starvation"; "divalent metal ion transport"; "indoleacetic acid biosynthetic process"; "tryptophan catabolic process"	GO:0003674	molecular function	GO:0009507	chloroplast	5.47502	3.7309	4.53886	2.04434	NA	NA	NA	NA	NA
Glyma.01G129400	Glyma01g32090	Alanine glyoxylate aminotransferase-like protein	G7KX17_MEDTR	0	AT2G38400.1	0	alanine:glyoxylate aminotransferase 3	-	-	GO:0003824 GO:0008453 GO:0008483 GO:0030170	alanine-glyoxylate transami-se activity; "catalytic activity"; "pyridoxal phosphate binding"; "transami-se activity"	GO:0005739	mitochondrion	6.5336	5.98245	6.01757	5.23272	3.57826	4.40364	4.32946	4.20379	4.34501
Glyma.01G129700	Glyma01g32130	Transcription factor bHLH93	G7K7C1_MEDTR	3e-49	AT2G40435.1	1e-48	BEST Arabidopsis thaliana protein match is: transcription regulators (TAIR:AT3G56220.1); Has 289 Blast hits to 289 proteins in 30 species: Archae - 0; Bacteria - 0; Metazoa - 0; Fungi - 0; Plants - 289; Viruses - 0; Other Eukaryotes - 0 (source: NCBI BLink).	-	-	-	-	GO:0005634	nucleus	4.49548	3.53189	3.93593	2.00608	NA	-0.00299611	0.11726	0.0787796	-0.0798389
Glyma.01G130200	Glyma01g32190	Non-specific lipid-transfer protein	I1J7M1_SOYBN	1e-76	AT2G38530.1	3e-31	lipid transfer protein 2	GO:0006649 GO:0006869 GO:0009414 GO:0012501	lipid transport; "phospholipid transfer to membrane"; "programmed cell death"; "response to water deprivation"	GO:0008289	lipid binding	GO:0005576 GO:0005768 GO:0005794 GO:0005802 GO:0005886	Golgi apparatus; "endosome"; "extracellular region"; "plasma membrane"; "trans-Golgi network"	9.821	11.5884	11.7948	10.1836	4.3225	4.21014	4.81791	5.10181	4.54344
Glyma.01G131100	Glyma01g32360	Aspartate aminotransferase	B9SZA2_RICCO	0	AT2G30970.2	0	aspartate aminotransferase 1	GO:0006520 GO:0009058 GO:0009220 GO:0046686	biosynthetic process; "cellular amino acid metabolic process"; "pyrimidine ribonucleotide biosynthetic process"; "response to cadmium ion"	GO:0003824 GO:0004069 GO:0005507 GO:0008483 GO:0016740 GO:0030170	L-aspartate:2-oxoglutarate aminotransferase activity; "catalytic activity"; "copper ion binding"; "pyridoxal phosphate binding"; "transami-se activity"; "transferase activity"	GO:0005739	mitochondrion	9.55426	5.7016	6.38933	3.77127	-0.639723	3.6527	5.45594	5.90125	4.83852
Glyma.01G131200	Glyma01g32370	-	-	-	AT5G01790.1	1e-05	unknown protein; FUNCTIONS IN: molecular_function unknown; INVOLVED IN: biological_process unknown; LOCATED IN: chloroplast; EXPRESSED IN: 19 plant structures; EXPRESSED DURING: 13 growth stages; Has 121 Blast hits to 121 proteins in 12 species: Archae - 0; Bacteria - 0; Metazoa - 0; Fungi - 0; Plants - 121; Viruses - 0; Other Eukaryotes - 0 (source: NCBI BLink).	GO:0008150 GO:0042546	biological process; "cell wall biogenesis"	GO:0003674	molecular function	GO:0009507	chloroplast	5.01818	4.64328	3.95068	3.11329	NA	0.565058	2.11808	2.16243	0.951408
Glyma.01G131300	Glyma01g32380	Myosin heavy chain-like	Q7XIW7_ORYSJ	8e-103	AT2G38370.1	3e-112	Plant protein of unknown function (DUF827)	GO:0000278 GO:0006396 GO:0009640 GO:0009855 GO:0009944 GO:0010014 GO:0010075 GO:0010388 GO:0016567 GO:0016571 GO:0016579 GO:0045893	R- processing; "cullin deneddylation"; "determi-tion of bilateral symmetry"; "histone methylation"; "meristem initiation"; "mitotic cell cycle"; "photomorphogenesis"; "polarity specification of adaxial/abaxial axis"; "positive regulation of transcription, D--dependent"; "protein deubiquiti-tion"; "protein ubiquiti-tion"; "regulation of meristem growth"	GO:0003674	molecular function	GO:0005576	extracellular region	6.8885	4.77664	4.53506	2.54349	0.0476376	-0.000621929	0.54722	0.563364	0.00225974
Glyma.01G131900	Glyma01g32440	Ovate family protein 1	V5K8C1_9ROSI	7e-88	AT2G30400.1	2e-30	ovate family protein 2	GO:0006499 GO:0009407 GO:0010583 GO:0045892 GO:0048513	N-termi-l protein myristoylation; "negative regulation of transcription, D--dependent"; "organ development"; "response to cyclopentenone"; "toxin catabolic process"	-	-	GO:0005634	nucleus	2.27912	2.30656	1.71046	1.02941	-1.35736	-1.01334	-1.10717	-1.08887	NA
Glyma.01G132500	Glyma01g32750	Non-specific lipid-transfer protein	I1J7P1_SOYBN	2e-76	AT5G59310.1	8e-33	lipid transfer protein 4	GO:0006869 GO:0009409 GO:0009414 GO:0009651 GO:0009737 GO:0042538	hyperosmotic salinity response; "lipid transport"; "response to abscisic acid stimulus"; "response to cold"; "response to salt stress"; "response to water deprivation"	GO:0008289	lipid binding	GO:0005576	extracellular region	6.9244	3.81728	3.75545	1.31843	-0.362116	1.55591	1.41454	1.35109	1.54812
Glyma.01G132600	Glyma01g32760	Non-specific lipid-transfer protein	C6SVW1_SOYBN	4e-83	AT2G38540.1	1e-27	lipid transfer protein 1	GO:0006869	lipid transport	GO:0005516 GO:0008289	calmodulin binding; "lipid binding"	GO:0005576 GO:0005886 GO:0009505 GO:0009534 GO:0048046	apoplast; "chloroplast thylakoid"; "extracellular region"; "plant-type cell wall"; "plasma membrane"	5.77117	4.65947	4.52816	3.32823	2.39829	2.80208	3.12747	3.1752	2.81423
Glyma.01G133300	Glyma01g32855	Receptor-like protein kinase	G7KY56_MEDTR	0	AT3G56370.1	0	Leucine-rich repeat protein kinase family protein	GO:0000272 GO:0005982 GO:0006468 GO:0007169 GO:0007389 GO:0008356 GO:0008361 GO:0009664 GO:0009832 GO:0009926 GO:0010015 GO:0010075 GO:0040007 GO:0048653	anther development; "asymmetric cell division"; "auxin polar transport"; "growth"; "pattern specification process"; "plant-type cell wall biogenesis"; "plant-type cell wall organization"; "polysaccharide catabolic process"; "protein phosphorylation"; "regulation of cell size"; "regulation of meristem growth"; "root morphogenesis"; "starch metabolic process"; "transmembrane receptor protein tyrosi…	GO:0004672 GO:0004674 GO:0005515 GO:0005524 GO:0016301 GO:0016772	ATP binding; "ki-se activity"; "protein binding"; "protein ki-se activity"; "protein serine/threonine ki-se activity"; "transferase activity, transferring phosphorus-containing groups"	GO:0005886	plasma membrane	1.40925	0.884272	0.835927	-1.52331	-1.35736	0.574819	0.632741	0.608358	-0.0798389
Glyma.01G133400	Glyma01g32870	Protein transport protein Sec61 beta subunit	G7LJD9_MEDTR	2e-33	AT3G60540.2	8e-34	Preprotein translocase Sec, Sec61-beta subunit protein	GO:0009627 GO:0015031 GO:0034976	protein transport; "response to endoplasmic reticulum stress"; "systemic acquired resistance"	GO:0008565	protein transporter activity	-	-	8.18151	7.4303	7.08866	6.75388	4.68253	4.68971	5.07001	5.32294	4.88748
Glyma.01G133600	#N/A	-	-	-	-	-	-	-	-	-	-	-	-	0.850753	0.532757	-0.182774	-1.52331	NA	NA	NA	NA	NA
Glyma.01G134300	#N/A	-	-	-	-	-	-	-	-	-	-	-	-	4.71039	3.75248	3.033	3.21847	2.06797	1.35684	0.54722	0.563364	2.10438
Glyma.01G134600	Glyma01g33070	Glycinol 4-dimethylallyltransferase	G4DT_SOYBN	4e-175	AT2G18950.1	3e-100	homogentisate phytyltransferase 1	GO:0000096 GO:0006546 GO:0006636 GO:0006733 GO:0006766 GO:0008652 GO:0009072 GO:0009106 GO:0009108 GO:0009117 GO:0009266 GO:0009416 GO:0009695 GO:0009915 GO:0009965 GO:0010189 GO:0015994 GO:0019216 GO:0019288 GO:0019748 GO:0030154 GO:0031347 GO:0031408 GO:0042362 GO:0044272 GO:0045893 GO:0071555	aromatic amino acid family metabolic process; "cell differentiation"; "cell wall organization"; "cellular amino acid biosynthetic process"; "chlorophyll metabolic process"; "coenzyme biosynthetic process"; "fat-soluble vitamin biosynthetic process"; "glycine catabolic process"; "isopentenyl diphosphate biosynthetic process, mevalo-te-independent pathway"; "jasmonic acid biosynthetic process"; "le…	GO:0004659 GO:0010176	homogentisate phytyltransferase activity; "prenyltransferase activity"	GO:0005886 GO:0009507 GO:0016021	chloroplast; "integral to membrane"; "plasma membrane"	-1.49729	-1.02355	3.98488	-1.52331	NA	NA	NA	NA	NA
Glyma.01G134900	#N/A	-	-	-	AT4G04480.1	7e-99	unknown protein; LOCATED IN: chloroplast; EXPRESSED IN: flower, pollen tube; EXPRESSED DURING: petal differentiation and expansion stage; BEST Arabidopsis thaliana protein match is: F-box family protein with a domain of unknown function (DUF295) (TAIR:AT4G22030.1); Has 78 Blast hits to 78 proteins in 10 species: Archae - 0; Bacteria - 0; Metazoa - 0; Fungi - 0; Plants - 78; Viruses - 0; Other Euk…	-	-	-	-	GO:0009507	chloroplast	0.987668	1.37594	2.9529	3.08923	2.86048	3.91068	3.73789	3.7567	2.90621
Glyma.01G135200	Glyma01g33150	Cytochrome P450 82A4	C82A4_SOYBN	0	AT4G31940.1	3e-160	cytochrome P450, family 82, subfamily C, polypeptide 4	GO:0010043 GO:0055114 GO:0071281	cellular response to iron ion; "oxidation-reduction process"; "response to zinc ion"	GO:0004497 GO:0005506 GO:0009055 GO:0016705 GO:0019825 GO:0020037	electron carrier activity; "heme binding"; "iron ion binding"; "monooxyge-se activity"; "oxidoreductase activity, acting on paired donors, with incorporation or reduction of molecular oxygen"; "oxygen binding"	GO:0009507	chloroplast	3.46287	4.27845	6.0111	3.18487	-0.639723	NA	-1.10717	-1.08887	-0.927841
Glyma.01G136200	#N/A	-	-	-	-	-	-	-	-	-	-	-	-	1.94327	1.44024	2.18035	1.54389	-0.639723	NA	NA	NA	0.675164
Glyma.01G136300	Glyma01g33270	SCL6	C9EHU3_PONTR	0	AT4G00150.1	6e-128	GRAS family transcription factor	GO:0006355 GO:0007623 GO:0010492 GO:0030154 GO:0048768 GO:0051301	cell differentiation; "cell division"; "circadian rhythm"; "mainte-nce of shoot apical meristem identity"; "regulation of transcription, D--dependent"; "root hair cell tip growth"	GO:0003700 GO:0005515	protein binding; "sequence-specific D- binding transcription factor activity"	GO:0005634	nucleus	6.9286	5.48862	5.17611	4.23126	3.26506	2.76604	2.15869	2.16598	1.54812
Glyma.01G136800	Glyma01g33313	NADH dehydrogenase subunit	G7I9T5_MEDTR	1e-20	ATMG01320.1	3e-102	NADH dehydrogenase 2B	GO:0009409	response to cold	GO:0003746 GO:0003924 GO:0005507 GO:0005525 GO:0008135	GTP binding; "GTPase activity"; "copper ion binding"; "translation elongation factor activity"; "translation factor activity, nucleic acid binding"	GO:0005730 GO:0005737 GO:0005774 GO:0005829 GO:0005886 GO:0009506 GO:0009507 GO:0016020 GO:0048046	apoplast; "chloroplast"; "cytoplasm"; "cytosol"; "membrane"; "nucleolus"; "plasma membrane"; "plasmodesma"; "vacuolar membrane"	1.09031	0.956444	0.498864	-0.52691	5.23809	6.63818	6.23139	6.17061	5.80394
Glyma.01G136900	Glyma01g33326	NADH dehydrogenase subunit 2	M1FPG4_SOYBN	4e-55	ATMG01320.1	2e-55	NADH dehydrogenase 2B	GO:0042773 GO:0045333 GO:0055114	ATP synthesis coupled electron transport; "cellular respiration"; "oxidation-reduction process"	GO:0003954 GO:0008137	-DH dehydroge-se (ubiquinone) activity; "-DH dehydroge-se activity"	GO:0005739 GO:0005747 GO:0009507	chloroplast; "mitochondrial respiratory chain complex I"; "mitochondrion"	NA	NA	NA	1.57341	1.29575	2.93709	3.8656	3.85026	3.55077
Glyma.01G137200	Glyma01g33370	YABBY-like transcription factor GRAMINIFOLIA	Q6SS00_ANTMA	3e-123	AT2G45190.1	1e-97	Plant-specific transcription factor YABBY family protein	GO:0006333 GO:0009737 GO:0009793 GO:0009845 GO:0009909 GO:0009933 GO:0009944 GO:0010027 GO:0010093 GO:0010103 GO:0010154 GO:0010158 GO:0010159 GO:0010162 GO:0010228 GO:0010450 GO:0016226 GO:0045165 GO:0048481	abaxial cell fate specification; "cell fate commitment"; "chromatin assembly or disassembly"; "embryo development ending in seed dormancy"; "fruit development"; "inflorescence meristem growth"; "iron-sulfur cluster assembly"; "meristem structural organization"; "ovule development"; "polarity specification of adaxial/abaxial axis"; "regulation of flower development"; "response to abscisic acid sti…	GO:0003700 GO:0005515	protein binding; "sequence-specific D- binding transcription factor activity"	GO:0005634	nucleus	9.48421	9.55389	9.66332	8.44897	5.55737	5.39267	6.17992	6.06883	5.90258
Glyma.01G137500	Glyma01g33420	Auxin-responsive family protein	B9GPD7_POPTR	2e-50	AT2G45210.1	1e-43	SAUR-like auxin-responsive protein family	GO:0009733 GO:1900057	positive regulation of leaf senescence; "response to auxin stimulus"	GO:0003674	molecular function	GO:0005739	mitochondrion	7.91471	5.37248	5.0652	4.54784	5.12454	4.53072	4.5432	4.31261	4.28433
Glyma.01G137800	#N/A	-	-	-	-	-	-	-	-	-	-	-	-	2.38423	4.19609	2.34741	4.63759	5.36698	6.69991	4.81159	5.03315	4.38111
Glyma.01G137900	Glyma01g33461	Genomic DNA, chromosome 3, BAC clone:F16J14	Q9LJ94_ARATH	1e-38	AT3G22520.1	2e-41	unknown protein; INVOLVED IN: biological_process unknown; LOCATED IN: chloroplast stroma, chloroplast, chloroplast envelope; EXPRESSED IN: 24 plant structures; EXPRESSED DURING: 13 growth stages; BEST Arabidopsis thaliana protein match is: unknown protein (TAIR:AT4G14840.1); Has 717 Blast hits to 703 proteins in 179 species: Archae - 14; Bacteria - 134; Metazoa - 141; Fungi - 74; Plants - 209; Vi…	GO:0000394 GO:0006346 GO:0008150 GO:0009086 GO:0009616 GO:0010050 GO:0010267 GO:0016246 GO:0031048 GO:0035196 GO:0051567	R- interference; "R- splicing, via endonucleolytic cleavage and ligation"; "biological process"; "chromatin silencing by small R-"; "histone H3-K9 methylation"; "methionine biosynthetic process"; "methylation-dependent chromatin silencing"; "production of miR-s involved in gene silencing by miR-"; "production of ta-siR-s involved in R- interference"; "vegetative phase change"; "virus induced gene…	-	-	GO:0005634 GO:0009507 GO:0009570 GO:0009941	chloroplast; "chloroplast envelope"; "chloroplast stroma"; "nucleus"	1.40925	0.884272	0.835927	-1.52331	NA	NA	NA	NA	NA
Glyma.01G139900	Glyma01g33708	Probable tRNA N6-adenosine threonylcarbamoyltransferase, mitochondrial	OSGP2_ARATH	1e-34	AT2G45270.1	1e-37	glycoprotease 1	GO:0006508 GO:0009790 GO:0016556	embryo development; "mR- modification"; "proteolysis"	GO:0004222	metalloendopeptidase activity	GO:0005743 GO:0009507	chloroplast; "mitochondrial inner membrane"	5.10417	7.01807	6.27858	7.33748	7.77875	8.72606	8.19929	8.40762	8.44369
Glyma.01G140300	Glyma01g33782	SAM (And some other nucleotide) binding motif; Methyltransferase small; Tetratricopeptide-like helical	Q2HS71_MEDTR	5e-153	AT2G22410.1	2e-100	SLOW GROWTH 1	GO:0008150	biological process	-	-	GO:0005739	mitochondrion	1.95557	3.22655	2.09995	2.68202	4.7696	5.1683	4.17039	4.04553	4.33625
Glyma.01G141900	Glyma01g34236	Glycine-rich protein-like	Q5VNV0_ORYSJ	1e-60	AT2G45380.1	1e-60	FUNCTIONS IN: molecular_function unknown; INVOLVED IN: biological_process unknown; LOCATED IN: cellular_component unknown; EXPRESSED IN: inflorescence meristem, flower, cultured cell; EXPRESSED DURING: petal differentiation and expansion stage; BEST Arabidopsis thaliana protein match is: Calcium-binding EF-hand family protein (TAIR:AT4G34070.1); Has 171 Blast hits to 170 proteins in 31 species: A…	GO:0008150	biological process	GO:0003674	molecular function	GO:0005634	nucleus	7.52304	8.94384	8.98839	9.41435	9.95104	10.9901	11.7988	11.6934	11.4267
Glyma.01G142800	Glyma01g34360	Zeta class glutathione S-transferase protein	F5CRR1_BRUGY	2e-108	AT2G02390.1	6e-71	glutathione S-transferase zeta 1	GO:0006635 GO:0009407 GO:0043161 GO:0051788 GO:0080129 GO:1902000	fatty acid beta-oxidation; "homogentisate catabolic process"; "proteasomal ubiquitin-dependent protein catabolic process"; "proteasome core complex assembly"; "response to misfolded protein"; "toxin catabolic process"	GO:0004364 GO:0016034	glutathione transferase activity; "maleylacetoacetate isomerase activity"	GO:0005737 GO:0005829	cytoplasm; "cytosol"	3.96855	1.95316	2.4823	NA	-0.639723	-0.986998	0.936542	0.970544	-1.07126
Glyma.01G143000	Glyma01g34400	-	-	-	-	-	-	-	-	-	-	-	-	5.38305	3.85075	4.22713	2.97811	4.78761	6.06026	6.03919	5.98537	6.02138
Glyma.01G143100	Glyma01g34410	AT hook motif-containing family protein	B9I4J9_POPTR	7e-100	AT4G12080.1	2e-97	AT-hook motif nuclear-localized protein 1	GO:0016132	brassinosteroid biosynthetic process	GO:0003677	D- binding	GO:0005634 GO:0005730 GO:0005737 GO:0005739	cytoplasm; "mitochondrion"; "nucleolus"; "nucleus"	6.49944	5.80662	5.57327	4.90473	3.53286	3.86118	4.19978	4.32193	3.81858
Glyma.01G143800	Glyma01g34523	LOB domain-containing protein	G7L0B7_MEDTR	1e-64	AT4G00210.1	7e-63	LOB domain-containing protein 31	GO:0008150	biological process	-	-	GO:0005634	nucleus	2.07249	3.48404	2.09995	3.76736	4.72071	5.58207	5.73487	5.83048	5.19847
Glyma.01G144200	Glyma01g34560	Brefeldin A-inhibited guanine nucleotide-exchange protein	G7L099_MEDTR	0	AT3G60860.1	0	SEC7-like guanine nucleotide exchange family protein	GO:0016192 GO:0032012 GO:0050790	regulation of ARF protein sig-l transduction; "regulation of catalytic activity"; "vesicle-mediated transport"	GO:0005085 GO:0005086	ARF guanyl-nucleotide exchange factor activity; "guanyl-nucleotide exchange factor activity"	GO:0005622 GO:0005737 GO:0005829	cytoplasm; "cytosol"; "intracellular"	9.27533	7.60788	7.65469	5.76345	4.06267	3.75232	2.92377	3.00853	2.62012
Glyma.01G144300	Glyma01g34570	Calcium-binding protein CML24	G7L0A0_MEDTR	5e-78	AT1G24620.1	1e-29	EF hand calcium-binding protein family	GO:0009409 GO:0048610 GO:0048767 GO:0048868	cellular process involved in reproduction; "pollen tube development"; "response to cold"; "root hair elongation"	GO:0005509	calcium ion binding	GO:0005634 GO:0005737	cytoplasm; "nucleus"	3.02861	2.16219	2.33814	0.810636	-0.362116	0.592839	-0.891919	-0.91204	-1.07126
Glyma.01G144400	Glyma01g34580	DNA-binding family protein	B9IC09_POPTR	2e-110	AT2G45430.1	4e-87	AT-hook motif nuclear-localized protein 22	GO:0000041 GO:0009640 GO:0009647 GO:0010228 GO:0010359 GO:0016132	brassinosteroid biosynthetic process; "photomorphogenesis"; "regulation of anion channel activity"; "skotomorphogenesis"; "transition metal ion transport"; "vegetative to reproductive phase transition of meristem"	GO:0003680	AT D- binding	GO:0005634	nucleus	4.31618	4.80445	4.52202	4.17342	1.1166	1.99682	1.83869	1.81051	2.35877
Glyma.01G144500	Glyma01g34590	Armadillo repeat-containing kinesin-like protein	G7L0A2_MEDTR	0	AT1G01950.1	0	armadillo repeat kinesin 2	GO:0007018 GO:0048364	microtubule-based movement; "root development"	GO:0003777 GO:0005524	ATP binding; "microtubule motor activity"	-	-	6.58303	4.44743	4.32144	2.94086	2.74972	1.96871	2.05146	2.00372	1.50838
Glyma.01G144900	Glyma01g34650	Growth-regulating factor	G7ZW50_MEDTR	2e-156	AT2G45480.1	2e-37	growth-regulating factor 9	GO:0006355 GO:0048366	leaf development; "regulation of transcription, D--dependent"	GO:0005524 GO:0016818	ATP binding; "hydrolase activity, acting on acid anhydrides, in phosphorus-containing anhydrides"	GO:0005634	nucleus	7.83329	6.90903	6.26527	5.82146	5.1315	4.31859	3.91256	4.03227	3.68672
Glyma.01G145000	Glyma01g34660	NADH dehydrogenase	B7FN64_MEDTR	1e-69	AT5G18800.2	1e-62	Cox19-like CHCH family protein	GO:0006120 GO:0009853	mitochondrial electron transport, -DH to ubiquinone; "photorespiration"	GO:0008137	-DH dehydroge-se (ubiquinone) activity	GO:0005739 GO:0005747 GO:0009507	chloroplast; "mitochondrial respiratory chain complex I"; "mitochondrion"	7.4308	5.95827	5.97183	4.68602	2.94948	3.42537	3.32946	3.22411	3.00808
Glyma.01G145800	Glyma01g34750	Actin-like protein 2/3 complex subunit 4 (Fragment)	G5DXD2_SILLA	1e-21	AT4G14147.1	7e-26	protein binding	GO:0000902 GO:0007015 GO:0030041 GO:0045010	actin filament organization; "actin filament polymerization"; "actin nucleation"; "cell morphogenesis"	GO:0005515	protein binding	GO:0005737 GO:0005856 GO:0005885	Arp2/3 protein complex; "cytoplasm"; "cytoskeleton"	3.88585	7.04561	6.56712	7.17049	7.05882	7.42938	6.33321	6.24424	6.28716
Glyma.01G146300	Glyma01g34800	Lactoylglutathione lyase	G7KPV1_MEDTR	0	AT1G67280.1	1e-176	Glyoxalase/Bleomycin resistance protein/Dioxygenase superfamily protein	GO:0005975 GO:0009409 GO:0019243	carbohydrate metabolic process; "methylglyoxal catabolic process to D-lactate"; "response to cold"	GO:0004462 GO:0046872	lactoylglutathione lyase activity; "metal ion binding"	GO:0005739 GO:0009507 GO:0009570 GO:0009579 GO:0010319 GO:0031977	chloroplast; "chloroplast stroma"; "mitochondrion"; "stromule"; "thylakoid"; "thylakoid lumen"	6.29551	5.6051	5.54523	5.16117	2.29785	2.58034	2.23878	2.17225	2.4501
Glyma.01G146500	Glyma01g34830	RING finger family protein	G7KNZ9_MEDTR	4e-135	AT4G28890.1	5e-115	RING/U-box superfamily protein	GO:0000041 GO:0016567 GO:0048527 GO:0048589 GO:0048765 GO:0048767	developmental growth; "lateral root development"; "protein ubiquiti-tion"; "root hair cell differentiation"; "root hair elongation"; "transition metal ion transport"	GO:0004842 GO:0008270	ubiquitin-protein ligase activity; "zinc ion binding"	-	-	4.49286	5.42549	4.94767	4.19873	2.18832	2.18062	1.83869	1.81051	1.54812
Glyma.01G146600	Glyma01g34840	Protein phosphatase 2C and cyclic nucleotide-binding/kinase domain-containing protein	P2C19_ARATH	0	AT2G20050.1	0	protein serine/threonine phosphatases;protein kinases;catalytics;cAMP-dependent protein kinase regulators;ATP binding;protein serine/threonine phosphatases	GO:0001932 GO:0006468 GO:0006470 GO:0006499	N-termi-l protein myristoylation; "protein dephosphorylation"; "protein phosphorylation"; "regulation of protein phosphorylation"	GO:0003824 GO:0004672 GO:0004722 GO:0005524 GO:0008603 GO:0016772	ATP binding; "cAMP-dependent protein ki-se regulator activity"; "catalytic activity"; "protein ki-se activity"; "protein serine/threonine phosphatase activity"; "transferase activity, transferring phosphorus-containing groups"	GO:0005886 GO:0005952 GO:0008287	cAMP-dependent protein ki-se complex; "plasma membrane"; "protein serine/threonine phosphatase complex"	8.46451	7.51711	7.30094	6.11661	5.40862	5.76997	5.985	5.78406	5.36537
Glyma.01G147500	Glyma01g34990	Similarity to limonene cyclase	Q9FGV3_ARATH	0	AT5G37000.1	0	Exostosin family protein	GO:0008150	biological process	GO:0003824	catalytic activity	GO:0005794 GO:0016020	Golgi apparatus; "membrane"	6.48002	4.46208	4.28828	2.30326	1.1831	2.68124	1.96247	1.84828	2.09318
Glyma.01G147600	Glyma01g35010	AP2 domain class transcription factor	D5L123_MALDO	1e-56	AT5G11590.1	2e-57	Integrase-type DNA-binding superfamily protein	GO:0006355 GO:0045893	positive regulation of transcription, D--dependent; "regulation of transcription, D--dependent"	GO:0003677 GO:0003700 GO:0043565	D- binding; "sequence-specific D- binding"; "sequence-specific D- binding transcription factor activity"	GO:0005634	nucleus	1.81238	1.77452	1.2274	0.46158	NA	NA	-1.10717	-1.08887	NA
Glyma.01G148400	Glyma01g35120	Disease resistance protein	C6ZS21_SOYBN	0	AT3G07040.1	2e-56	NB-ARC domain-containing disease resistance protein	GO:0006952 GO:0009626	defense response; "plant-type hypersensitive response"	GO:0000166 GO:0005515 GO:0043531	ADP binding; "nucleotide binding"; "protein binding"	GO:0005886	plasma membrane	-1.49729	-1.02355	NA	-1.52331	-0.362116	1.30728	1.35783	1.33157	0.497073
Glyma.01G148700	Glyma01g35160	Similar to histone-lysine N-methyltransferase ASHR2	L0P2I2_LUPAN	4e-165	AT2G19640.2	3e-112	ASH1-related protein 2	GO:0008150	biological process	GO:0003674	molecular function	GO:0005634	nucleus	8.66629	4.92485	4.43025	0.774788	-0.362116	1.30728	1.96491	1.99239	0.497073
Glyma.01G148900	Glyma01g35180	Similar to protein BREVIS RADIX-like	L0P1C1_LUPAN	3e-162	AT1G31880.1	6e-154	DZC (Disease resistance/zinc finger/chromosome condensation-like region) domain containing protein	GO:0009734 GO:0009736 GO:0009737 GO:0048364 GO:0048527	auxin mediated sig-ling pathway; "cytokinin mediated sig-ling pathway"; "lateral root development"; "response to abscisic acid stimulus"; "root development"	GO:0015250 GO:0042802	identical protein binding; "water channel activity"	GO:0005634	nucleus	4.97005	3.44787	3.69732	1.61804	3.80205	4.98605	4.6074	4.5209	4.58414
Glyma.01G149300	Glyma01g35220	Dehydration-responsive family protein	U5GUD4_POPTR	0	AT1G31850.2	0	S-adenosyl-L-methionine-dependent methyltransferases superfamily protein	-	-	GO:0008168	methyltransferase activity	GO:0005768 GO:0005794 GO:0005802	Golgi apparatus; "endosome"; "trans-Golgi network"	6.49758	7.63014	7.52077	6.4023	3.55605	4.00528	3.91903	3.96428	4.07097
Glyma.01G149500	Glyma01g35255	CYCLOPS	A9XMT3_LOTJA	0	-	-	-	-	-	-	-	-	-	2.20805	1.33317	1.27462	-1.52331	NA	NA	NA	NA	NA
Glyma.01G149800	Glyma01g35291	NO POLLEN GERMINATION 1 family protein	B9GSQ7_POPTR	0	AT2G43040.1	0	tetratricopeptide repeat (TPR)-containing protein	GO:0009846 GO:0016132	brassinosteroid biosynthetic process; "pollen germi-tion"	GO:0005516	calmodulin binding	GO:0005634	nucleus	6.15233	4.9583	4.43745	3.20432	1.53488	2.93857	3.07145	2.98373	2.73324
Glyma.01G150500	Glyma01g35370	Zinc finger and SCAN domain-containing protein	G7K6R0_MEDTR	5e-148	AT2G38250.1	5e-47	Homeodomain-like superfamily protein	GO:0006355 GO:0010200	regulation of transcription, D--dependent; "response to chitin"	GO:0003677 GO:0003700 GO:0005515	D- binding; "protein binding"; "sequence-specific D- binding transcription factor activity"	GO:0005634 GO:0005730 GO:0016592	mediator complex; "nucleolus"; "nucleus"	6.59162	7.63006	7.52295	7.71638	8.69131	9.28885	9.36313	9.42811	9.28213
Glyma.01G150700	Glyma01g35390	Leucine-rich repeat transmembrane protein kinase	C6ZRV8_SOYBN	0	AT1G31420.2	0	Leucine-rich repeat protein kinase family protein	GO:0000271 GO:0000272 GO:0005982 GO:0006468 GO:0007169 GO:0009664 GO:0009825 GO:0009826 GO:0009832 GO:0009932 GO:0010817 GO:0016049 GO:0019761 GO:0030243 GO:0043481 GO:0046777 GO:0048767 GO:0071555	anthocyanin accumulation in tissues in response to UV light; "cell growth"; "cell tip growth"; "cell wall organization"; "cellulose metabolic process"; "glucosinolate biosynthetic process"; "multidimensio-l cell growth"; "plant-type cell wall biogenesis"; "plant-type cell wall organization"; "polysaccharide biosynthetic process"; "polysaccharide catabolic process"; "protein autophosphorylation"; …	GO:0004672 GO:0004674 GO:0004713 GO:0005524 GO:0016301 GO:0016772	ATP binding; "ki-se activity"; "protein ki-se activity"; "protein serine/threonine ki-se activity"; "protein tyrosine ki-se activity"; "transferase activity, transferring phosphorus-containing groups"	GO:0005886	plasma membrane	9.43568	7.26377	7.19327	5.41599	5.94852	6.54774	5.64875	5.53598	5.68882
Glyma.01G151400	Glyma01g35460	-	-	-	-	-	-	-	-	-	-	-	-	1.94327	1.44024	1.42406	-0.52691	-1.35736	0.97597	1.07372	1.02918	1.30282
Glyma.01G151600	Glyma01g35480	PAE	B3V945_LITCN	0	AT4G19420.1	0	Pectinacetylesterase family protein	GO:0008150	biological process	GO:0004091	carboxylesterase activity	GO:0005576	extracellular region	6.29717	5.95166	5.52164	4.764	3.15803	2.49798	2.00847	1.99819	1.54812
Glyma.01G151700	Glyma01g35490	RING finger protein	G7K5F2_MEDTR	0	AT5G45290.1	3e-121	RING/U-box superfamily protein	GO:0006499	N-termi-l protein myristoylation	GO:0008270	zinc ion binding	GO:0005634	nucleus	5.92099	3.82211	3.51912	1.24361	-0.362116	0.592839	-0.891919	-0.91204	0.00225974
Glyma.01G152000	Glyma01g35530	Anthraniloyl-CoA:methanol acyltransferase	ACMAT_VITLA	7e-177	AT5G17540.1	8e-130	HXXXD-type acyl-transferase family protein	-	-	GO:0016747	transferase activity, transferring acyl groups other than amino-acyl groups	GO:0005737	cytoplasm	5.60599	4.00349	3.53097	1.86529	NA	NA	NA	NA	NA
Glyma.01G152100	Glyma01g35540	Rop guanine nucleotide exchange factor	F6LPV3_MEDTR	0	AT1G31650.1	0	RHO guanyl-nucleotide exchange factor 14	GO:0019344 GO:0080092	cysteine biosynthetic process; "regulation of pollen tube growth"	GO:0005089	Rho guanyl-nucleotide exchange factor activity	GO:0005739	mitochondrion	10.1396	8.76703	9.07817	6.68184	3.8132	4.3784	4.96301	4.71375	4.92855
Glyma.01G153000	Glyma01g35630	-	-	-	AT1G31720.1	2e-38	Protein of unknown function (DUF1218)	GO:0008150	biological process	GO:0003674	molecular function	GO:0005575	cellular component	8.34664	10.9887	11.2589	10.0792	8.61512	8.09131	8.96276	8.60351	8.77328
Glyma.01G153300	Glyma01g35660	Abscisic acid 8'-hydroxylase	B0L642_SOYBN	0	AT4G19230.1	0	cytochrome P450, family 707, subfamily A, polypeptide 1	GO:0009639 GO:0009687 GO:0048838 GO:0050832 GO:0055114	abscisic acid metabolic process; "defense response to fungus"; "oxidation-reduction process"; "release of seed from dormancy"; "response to red or far red light"	GO:0005506 GO:0009055 GO:0010295 GO:0016705 GO:0019825 GO:0020037	(+)-abscisic acid 8'-hydroxylase activity; "electron carrier activity"; "heme binding"; "iron ion binding"; "oxidoreductase activity, acting on paired donors, with incorporation or reduction of molecular oxygen"; "oxygen binding"	GO:0005576	extracellular region	10.5853	10.0079	9.97418	8.96709	7.70857	6.40781	6.78776	7.03509	6.84011
Glyma.01G153400	Glyma01g35671	30S ribosomal protein S4, chloroplastic	RR4_SOYBN	6e-124	ATCG00380.1	1e-106	chloroplast ribosomal protein S4	GO:0006091 GO:0006354 GO:0006412 GO:0015979	D--dependent transcription, elongation; "generation of precursor metabolites and energy"; "photosynthesis"; "translation"	GO:0003723 GO:0003735 GO:0019843	R- binding; "rR- binding"; "structural constituent of ribosome"	GO:0000312 GO:0005622 GO:0009507 GO:0009570 GO:0015935 GO:0016020	chloroplast; "chloroplast stroma"; "intracellular"; "membrane"; "plastid small ribosomal subunit"; "small ribosomal subunit"	2.42882	3.67533	2.96289	4.49756	4.36299	5.32501	2.89497	3.01212	2.0047
Glyma.01G153500	Glyma01g35681	Photosystem II D2 protein	PSBD_MORIN	2e-147	ATCG00270.1	1e-148	photosystem II reaction center protein D	GO:0006091 GO:0006354 GO:0009769 GO:0009772 GO:0010207 GO:0015979 GO:0019684	D--dependent transcription, elongation; "generation of precursor metabolites and energy"; "photosynthesis"; "photosynthesis, light harvesting in photosystem II"; "photosynthesis, light reaction"; "photosynthetic electron transport in photosystem II"; "photosystem II assembly"	GO:0045156 GO:0045157	electron transporter, transferring electrons within the cyclic electron transport pathway of photosynthesis activity; "electron transporter, transferring electrons within the noncyclic electron transport pathway of photosynthesis activity"	GO:0005737 GO:0009507 GO:0009523 GO:0009534 GO:0009535 GO:0009579 GO:0010287 GO:0016020 GO:0030076	chloroplast; "chloroplast thylakoid"; "chloroplast thylakoid membrane"; "cytoplasm"; "light-harvesting complex"; "membrane"; "photosystem II"; "plastoglobule"; "thylakoid"	2.46842	2.77391	3.16379	3.33554	4.77328	6.00714	3.16674	3.26273	3.57784
Glyma.01G153600	Glyma01g35690	-	-	-	AT2G35610.1	0	xyloglucanase 113	GO:0006486 GO:0052325 GO:0080147	cell wall pectin biosynthetic process; "protein glycosylation"; "root hair cell development"	GO:0052636	arabinosyltransferase activity	GO:0005634 GO:0005768 GO:0005783 GO:0005794 GO:0005802	Golgi apparatus; "endoplasmic reticulum"; "endosome"; "nucleus"; "trans-Golgi network"	5.22291	3.79147	3.46391	2.46093	1.53488	2.05225	1.53995	1.57063	0.55635
Glyma.01G153900	Glyma01g35720	-	-	-	AT3G54060.2	4e-46	unknown protein; BEST Arabidopsis thaliana protein match is: unknown protein (TAIR:AT2G37960.2); Has 35333 Blast hits to 34131 proteins in 2444 species: Archae - 798; Bacteria - 22429; Metazoa - 974; Fungi - 991; Plants - 531; Viruses - 0; Other Eukaryotes - 9610 (source: NCBI BLink).	GO:0008150	biological process	GO:0003674	molecular function	GO:0005634	nucleus	2.4219	4.96566	3.73412	5.26022	6.02131	6.60207	6.69117	6.67706	6.45109
Glyma.01G154500	Glyma01g35820	Conserved oligomeric Golgi complex subunit	G7K400_MEDTR	0	AT1G31780.1	3e-172	CONTAINS InterPro DOMAIN/s: Conserved oligomeric complex COG6 (InterPro:IPR010490); Has 384 Blast hits to 379 proteins in 190 species: Archae - 0; Bacteria - 4; Metazoa - 151; Fungi - 156; Plants - 42; Viruses - 0; Other Eukaryotes - 31 (source: NCBI BLink).	GO:0006891 GO:0006944	cellular membrane fusion; "intra-Golgi vesicle-mediated transport"	GO:0003674	molecular function	GO:0005622 GO:0005794 GO:0005829	Golgi apparatus; "cytosol"; "intracellular"	5.65909	5.42693	4.70922	4.49013	3.11337	3.44701	1.88461	1.81945	2.1584
Glyma.01G154600	#N/A	Auxin-induced protein 5NG4	G7K3Y9_MEDTR	5e-66	AT4G19185.1	2e-57	nodulin MtN21 /EamA-like transporter family protein	-	-	-	-	GO:0005794 GO:0016020	Golgi apparatus; "membrane"	4.85853	3.65957	3.41743	1.73508	0.503705	0.592839	-0.891919	-0.91204	0.00225974
Glyma.01G155300	Glyma01g35950	Kinesin-like calmodulin binding protein	G7K2P2_MEDTR	0	AT5G65930.2	0	kinesin-like calmodulin-binding protein (ZWICHEL)	GO:0007018 GO:0009846 GO:0010091 GO:0055114	microtubule-based movement; "oxidation-reduction process"; "pollen germi-tion"; "trichome branching"	GO:0003777 GO:0003824 GO:0005515 GO:0005516 GO:0005524 GO:0008017 GO:0016491 GO:0016887	ATP binding; "ATPase activity"; "calmodulin binding"; "catalytic activity"; "microtubule binding"; "microtubule motor activity"; "oxidoreductase activity"; "protein binding"	GO:0005856 GO:0005886	cytoskeleton; "plasma membrane"	9.30728	7.53711	7.48474	5.80814	3.49272	3.87297	3.59681	3.41633	3.8983
Glyma.01G155400	Glyma01g35960	1-aminocyclopropane-1-carboxylate oxidase	G7K2P1_MEDTR	0	AT1G14130.1	2e-128	2-oxoglutarate (2OG) and Fe(II)-dependent oxygenase superfamily protein	GO:0055114	oxidation-reduction process	GO:0016491 GO:0016706	oxidoreductase activity; "oxidoreductase activity, acting on paired donors, with incorporation or reduction of molecular oxygen, 2-oxoglutarate as one donor, and incorporation of one atom each of oxygen into both donors"	GO:0005634 GO:0005737	cytoplasm; "nucleus"	8.5388	9.915	10.209	8.74674	4.97843	5.16012	6.35793	6.44206	5.93969
Glyma.01G155600	Glyma01g35980	Lectin-domain containing receptor kinase A4.2	G7K2N4_MEDTR	0	AT5G06740.1	4e-148	Concanavalin A-like lectin protein kinase family protein	GO:0000041 GO:0006468	protein phosphorylation; "transition metal ion transport"	GO:0004672 GO:0004674 GO:0005524 GO:0016301 GO:0016772 GO:0030246	ATP binding; "carbohydrate binding"; "ki-se activity"; "protein ki-se activity"; "protein serine/threonine ki-se activity"; "transferase activity, transferring phosphorus-containing groups"	GO:0005886	plasma membrane	7.17996	5.55348	5.43021	3.85594	3.4777	3.58208	2.69516	2.69728	2.29578
Glyma.01G156200	Glyma01g36030	Auxin efflux carrier protein	G7K2M6_MEDTR	0	AT1G76520.2	4e-158	Auxin efflux carrier family protein	GO:0009926 GO:0015824 GO:0019344 GO:0055085	auxin polar transport; "cysteine biosynthetic process"; "proline transport"; "transmembrane transport"	GO:0009672	auxin:hydrogen symporter activity	GO:0016021	integral to membrane	2.77633	2.63139	2.84149	1.24361	-1.35736	-1.01334	-1.10717	-1.08887	0.0814936
Glyma.01G156300	#N/A	Flavonol sulfotransferase-like protein	G7LHJ0_MEDTR	1e-19	-	-	-	-	-	-	-	-	-	2.4219	4.96566	5.13051	4.54295	3.65497	1.35684	0.0047454	0.00190919	1.05405
Glyma.01G156700	Glyma01g36080	3-hydroxy-3-methylglutaryl coenzyme A reductase	A9YVC3_MEDTR	0	AT1G76490.1	0	hydroxy methylglutaryl CoA reductase 1	GO:0006816 GO:0007030 GO:0007033 GO:0008299 GO:0009611 GO:0009651 GO:0009805 GO:0015936 GO:0016126 GO:0019287 GO:0055114 GO:0060964	Golgi organization; "calcium ion transport"; "coenzyme A metabolic process"; "coumarin biosynthetic process"; "isopentenyl diphosphate biosynthetic process, mevalo-te pathway"; "isoprenoid biosynthetic process"; "oxidation-reduction process"; "regulation of gene silencing by miR-"; "response to salt stress"; "response to wounding"; "sterol biosynthetic process"; "vacuole organization"	GO:0004420 GO:0005515 GO:0016616 GO:0042282 GO:0050661 GO:0050662	-DP binding; "coenzyme binding"; "hydroxymethylglutaryl-CoA reductase (-DPH) activity"; "hydroxymethylglutaryl-CoA reductase activity"; "oxidoreductase activity, acting on the CH-OH group of donors, -D or -DP as acceptor"; "protein binding"	GO:0005783 GO:0005789 GO:0016020 GO:0016021	endoplasmic reticulum; "endoplasmic reticulum membrane"; "integral to membrane"; "membrane"	6.00323	4.57308	4.24889	3.60424	1.53488	3.01262	3.42066	3.37993	3.03249
Glyma.01G157000	Glyma01g36110	Leucine-rich repeat-containing protein	G7K2L1_MEDTR	0	AT4G35470.1	0	plant intracellular ras group-related LRR 4	GO:0008150 GO:0009740 GO:0010162	biological process; "gibberellic acid mediated sig-ling pathway"; "seed dormancy process"	-	-	GO:0005634 GO:0005886	nucleus; "plasma membrane"	9.22306	7.61751	7.65684	5.87576	4.2673	4.70234	4.55955	4.30536	4.26796
Glyma.01G157300	Glyma01g36145	Monosaccharide-sensing protein	G7K2K7_MEDTR	0	AT3G51490.2	0	tonoplast monosaccharide transporter3	GO:0006810 GO:0055085	transmembrane transport; "transport"	GO:0005215 GO:0005337 GO:0005351 GO:0015144 GO:0022857 GO:0022891	carbohydrate transmembrane transporter activity; "nucleoside transmembrane transporter activity"; "substrate-specific transmembrane transporter activity"; "sugar:hydrogen symporter activity"; "transmembrane transporter activity"; "transporter activity"	GO:0009705 GO:0016020 GO:0016021	integral to membrane; "membrane"; "plant-type vacuole membrane"	7.0984	4.47809	4.82233	2.37721	2.30829	3.25482	3.11521	3.07786	2.98166
Glyma.01G157400	Glyma01g36160	Ring finger protein	G7K2K6_MEDTR	8e-113	AT1G76410.1	3e-59	RING/U-box superfamily protein	GO:0009744 GO:0009750 GO:0009855 GO:0009944 GO:0010014 GO:0010075	determi-tion of bilateral symmetry; "meristem initiation"; "polarity specification of adaxial/abaxial axis"; "regulation of meristem growth"; "response to fructose stimulus"; "response to sucrose stimulus"	GO:0008270	zinc ion binding	GO:0005634	nucleus	7.25691	7.72273	7.58237	7.11805	3.98731	3.80067	4.62711	4.77945	4.86139
Glyma.01G157600	Glyma01g36180	Chloroplast inner membrane localized protein	Q9C7S3_ARATH	1e-42	AT1G42960.1	1e-45	expressed protein localized to the inner membrane of the chloroplast.	GO:0008150 GO:0019344	biological process; "cysteine biosynthetic process"	GO:0003674	molecular function	GO:0005739 GO:0009507 GO:0009535 GO:0009536 GO:0009706 GO:0009941 GO:0016020	chloroplast; "chloroplast envelope"; "chloroplast inner membrane"; "chloroplast thylakoid membrane"; "membrane"; "mitochondrion"; "plastid"	5.3434	4.44409	4.29496	3.4688	1.96727	2.49798	1.83869	1.81051	2.0047
Glyma.01G157700	Glyma01g36190	Auxin efflux carrier family protein	B9H651_POPTR	0	AT5G65980.1	5e-172	Auxin efflux carrier family protein	GO:0009926 GO:0055085	auxin polar transport; "transmembrane transport"	GO:0009672	auxin:hydrogen symporter activity	GO:0016021	integral to membrane	2.67471	2.83565	3.31641	2.15039	-1.35736	-1.01334	-1.10717	-1.08887	NA
Glyma.01G158100	Glyma01g36240	Pentatricopeptide repeat-containing protein	G7K193_MEDTR	0	AT2G17525.1	0	Pentatricopeptide repeat (PPR) superfamily protein	GO:0008150	biological process	-	-	GO:0005739	mitochondrion	5.2737	5.74299	5.37226	5.94481	4.0447	3.55519	3.27593	3.23687	3.56686
Glyma.01G158600	Glyma01g36301	Nucleoside-triphosphatase THEP1	M7ZSJ9_TRIUA	1e-68	AT2G17550.1	4e-165	unknown protein; Has 264 Blast hits to 258 proteins in 65 species: Archae - 5; Bacteria - 5; Metazoa - 66; Fungi - 16; Plants - 107; Viruses - 0; Other Eukaryotes - 65 (source: NCBI BLink).	GO:0008150	biological process	GO:0003674	molecular function	GO:0005634	nucleus	5.6694	3.95875	3.54996	2.24814	0.503705	0.592839	0.0047454	0.00190919	-1.07126
Glyma.01G158800	Glyma01g36320	PH01B031C15.3 protein	L0P264_9POAL	3e-56	AT5G66005.3	7e-92	Expressed protein	-	-	GO:0000166 GO:0005524 GO:0016740 GO:0017111 GO:0019204	ATP binding; "nucleoside-triphosphatase activity"; "nucleotide binding"; "nucleotide phosphatase activity"; "transferase activity"	GO:0005634	nucleus	6.39925	4.1784	3.64597	1.88928	0.0476376	-0.000621929	-0.891919	-0.91204	0.00225974
Glyma.01G159200	Glyma01g36360	RWP-RK domain-containing protein	D7MCF1_ARALL	9e-89	AT4G35590.1	5e-87	RWP-RK domain-containing protein	GO:0006355	regulation of transcription, D--dependent	GO:0003700	sequence-specific D- binding transcription factor activity	GO:0005634	nucleus	6.72941	4.99215	4.85923	3.32823	2.29785	2.3466	2.15869	2.16598	1.25805
Glyma.01G159700	Glyma01g36430	G2/mitotic-specific cyclin-1	CCNB1_MEDSV	0	AT1G20610.1	2e-170	Cyclin B2;3	GO:0000079 GO:0051726	regulation of cell cycle; "regulation of cyclin-dependent protein serine/threonine ki-se activity"	GO:0005515 GO:0016538 GO:0019901	cyclin-dependent protein serine/threonine ki-se regulator activity; "protein binding"; "protein ki-se binding"	GO:0005634	nucleus	4.32424	2.70622	2.08702	0.810636	NA	-0.00299611	0.11726	0.0787796	-0.0798389
Glyma.01G160000	Glyma01g36460	Serine acetyltransferase	G7K010_MEDTR	6e-177	AT4G35640.1	5e-145	serine acetyltransferase 3;2	GO:0000103 GO:0006535	cysteine biosynthetic process from serine; "sulfate assimilation"	GO:0009001 GO:0016407 GO:0016740	acetyltransferase activity; "serine O-acetyltransferase activity"; "transferase activity"	GO:0005737 GO:0005829	cytoplasm; "cytosol"	6.5754	8.02991	8.28389	6.52637	1.4615	1.55591	1.83869	1.81051	1.79287
Glyma.01G160300	Glyma01g36500	DNA (Cytosine-5)-methyltransferase	G7K003_MEDTR	0	AT1G80740.1	0	chromomethylase 1	GO:0006306 GO:0009294	D- mediated transformation; "D- methylation"	GO:0003677	D- binding	GO:0005634	nucleus	4.83298	4.14898	4.26216	3.46589	1.80815	2.41244	3.05739	3.08944	2.26456
Glyma.01G160700	#N/A	-	-	-	AT4G35690.1	1e-51	Arabidopsis protein of unknown function (DUF241)	GO:0008150	biological process	GO:0003674	molecular function	GO:0009507	chloroplast	4.27944	4.92001	4.09969	3.95504	0.376098	NA	-1.10717	-1.08887	NA
Glyma.01G160800	#N/A	-	-	-	AT4G35690.1	3e-54	Arabidopsis protein of unknown function (DUF241)	GO:0008150	biological process	GO:0003674	molecular function	GO:0009507	chloroplast	4.66122	5.20789	4.91562	4.12607	2.01906	NA	NA	NA	NA
Glyma.01G160900	Glyma01g36560	-	-	-	AT4G35690.1	4e-53	Arabidopsis protein of unknown function (DUF241)	GO:0008150	biological process	GO:0003674	molecular function	GO:0009507	chloroplast	1.84668	1.13761	0.698777	-1.52331	NA	NA	NA	NA	NA
Glyma.01G161100	Glyma01g36590	Lysine histidine transporter-like protein	G7JYU3_MEDTR	0	AT1G47670.1	0	Transmembrane amino acid transporter family protein	GO:0006865 GO:0010075	amino acid transport; "regulation of meristem growth"	GO:0015171	amino acid transmembrane transporter activity	GO:0005886 GO:0016020	membrane; "plasma membrane"	3.57256	2.92633	3.07608	1.24361	NA	NA	NA	NA	NA
Glyma.01G161500	Glyma01g36620	Sulfurtransferase	V7CKR8_PHAVU	7e-99	AT4G35770.1	5e-57	Rhodanese/Cell cycle control phosphatase superfamily protein	GO:0006979 GO:0007568 GO:0009416 GO:0009611 GO:0009744 GO:0009750 GO:0009753	aging; "response to fructose stimulus"; "response to jasmonic acid stimulus"; "response to light stimulus"; "response to oxidative stress"; "response to sucrose stimulus"; "response to wounding"	GO:0003674	molecular function	GO:0009507	chloroplast	10.2209	14.177	14.4262	13.1899	12.6119	12.9292	13.3363	13.1886	13.2506
Glyma.01G162000	Glyma01g36670	Scaffold attachment factor B1	G7JYS1_MEDTR	3e-98	AT4G35785.2	6e-60	RNA-binding (RRM/RBD/RNP motifs) family protein	GO:0008150	biological process	GO:0000166 GO:0003676	nucleic acid binding; "nucleotide binding"	GO:0005634 GO:0030529	nucleus; "ribonucleoprotein complex"	8.48067	7.73304	7.62185	6.48588	5.52046	5.62382	5.48791	5.71954	5.59346
Glyma.01G163100	Glyma01g36780	Peroxidase (Fragment)	Q9ZRG6_SOYBN	0	AT5G42180.1	2e-158	Peroxidase superfamily protein	GO:0006979 GO:0010413 GO:0045492 GO:0055114	glucuronoxylan metabolic process; "oxidation-reduction process"; "response to oxidative stress"; "xylan biosynthetic process"	GO:0004601 GO:0020037	heme binding; "peroxidase activity"	GO:0005576 GO:0009505	extracellular region; "plant-type cell wall"	2.80699	3.19432	1.84427	2.61275	1.61395	-1.01334	-1.10717	-1.08887	NA
Glyma.01G163200	Glyma01g36790	-	-	-	AT1G63855.3	1e-91	Putative methyltransferase family protein	GO:0008150	biological process	GO:0003674	molecular function	GO:0005575	cellular component	5.23364	5.33865	5.02112	4.6849	2.40399	3.07719	3.00018	3.09966	2.1584
Glyma.01G163300	Glyma01g36801	ATP synthase subunit a chloroplastic	G7JXM0_MEDTR	0	AT4G35890.1	1e-65	winged-helix DNA-binding transcription factor family protein	GO:0010150 GO:0048523	leaf senescence; "negative regulation of cellular process"	-	-	GO:0005737 GO:0009507	chloroplast; "cytoplasm"	8.25903	5.88937	5.91379	3.98817	3.54837	3.50489	3.11521	3.07786	2.8743
Glyma.01G164000	Glyma01g36860	Cornifelin	G7LB65_MEDTR	0	AT4G35920.2	0	PLAC8 family protein	GO:0006655 GO:0006816 GO:0007020 GO:0007231 GO:0007638 GO:0019344 GO:0033500	calcium ion transport; "carbohydrate homeostasis"; "cysteine biosynthetic process"; "mechanosensory behavior"; "microtubule nucleation"; "osmosensory sig-ling pathway"; "phosphatidylglycerol biosynthetic process"	GO:0003674	molecular function	GO:0005886 GO:0005887	integral to plasma membrane; "plasma membrane"	10.4564	11.3453	11.5585	10.7559	8.75422	8.93171	9.65915	9.27986	9.30896
Glyma.01G164300	Glyma01g36890	3-dehydroquinate synthase	G3E7M4_SOYBN	0	AT5G66120.2	0	3-dehydroquinate synthase, putative	GO:0006744 GO:0009073	aromatic amino acid family biosynthetic process; "ubiquinone biosynthetic process"	GO:0003856	3-dehydroqui-te synthase activity	GO:0005737 GO:0005768 GO:0005794 GO:0005802 GO:0009507 GO:0009570	Golgi apparatus; "chloroplast"; "chloroplast stroma"; "cytoplasm"; "endosome"; "trans-Golgi network"	8.70517	7.84184	7.63236	6.97641	4.89856	4.8186	5.1732	5.16241	5.07852
Glyma.01G164400	Glyma01g36900	-	-	-	AT2G24960.2	3e-26	unknown protein; FUNCTIONS IN: molecular_function unknown; INVOLVED IN: biological_process unknown; LOCATED IN: cellular_component unknown; EXPRESSED IN: 21 plant structures; EXPRESSED DURING: 12 growth stages; BEST Arabidopsis thaliana protein match is: unknown protein (TAIR:AT4G02210.2); Has 30201 Blast hits to 17322 proteins in 780 species: Archae - 12; Bacteria - 1396; Metazoa - 17338; Fungi …	GO:0008150	biological process	GO:0003674	molecular function	GO:0005634	nucleus	3.97412	2.56306	2.6921	0.0555561	NA	-0.00299611	1.00604	1.00061	-0.0798389
Glyma.01G164500	Glyma01g36920	Proline-rich family protein	U5G4Q6_POPTR	0	AT3G51290.2	0	Protein of unknown function (DUF630) ;Protein of unknown function (DUF632)	GO:0000226 GO:0000911 GO:0006184 GO:0006306 GO:0006346 GO:0006499 GO:0007165 GO:0007264 GO:0009909 GO:0015031 GO:0016246 GO:0016458 GO:0031047 GO:0031048 GO:0034968 GO:0051225 GO:0051567	D- methylation; "GTP catabolic process"; "N-termi-l protein myristoylation"; "R- interference"; "chromatin silencing by small R-"; "cytokinesis by cell plate formation"; "gene silencing"; "gene silencing by R-"; "histone H3-K9 methylation"; "histone lysine methylation"; "methylation-dependent chromatin silencing"; "microtubule cytoskeleton organization"; "protein transport"; "regulation of flower…	GO:0003924 GO:0005525	GTP binding; "GTPase activity"	GO:0005622 GO:0005634 GO:0005737 GO:0016020	cytoplasm; "intracellular"; "membrane"; "nucleus"	8.33685	5.94556	6.07432	4.28693	4.51473	4.20563	4.05431	4.0352	4.40758
Glyma.01G164800	Glyma01g36950	Histidine kinase osmosensor protein	G7JXI9_MEDTR	0	AT2G17820.1	0	histidine kinase 1	GO:0006970 GO:0009414 GO:0010375 GO:0010431	response to osmotic stress; "response to water deprivation"; "seed maturation"; "stomatal complex patterning"	GO:0000155 GO:0000156 GO:0004673 GO:0004871 GO:0005034 GO:0005515 GO:0005524 GO:0009927 GO:0016772	ATP binding; "histidine phosphotransfer ki-se activity"; "osmosensor activity"; "phosphorelay response regulator activity"; "phosphorelay sensor ki-se activity"; "protein binding"; "protein histidine ki-se activity"; "sig-l transducer activity"; "transferase activity, transferring phosphorus-containing groups"	GO:0005886 GO:0016020	membrane; "plasma membrane"	5.57396	5.09985	4.32293	4.16532	0.376098	-0.986998	-0.891919	-0.91204	0.00225974
Glyma.01G164900	Glyma01g36960	ERD7 protein	G7JXI7_MEDTR	0	AT2G17840.1	0	Senescence/dehydration-associated protein-related	GO:0009409 GO:0009414 GO:0009644 GO:0009651 GO:0009737 GO:0010286	heat acclimation; "response to abscisic acid stimulus"; "response to cold"; "response to high light intensity"; "response to salt stress"; "response to water deprivation"	GO:0003674	molecular function	GO:0005737 GO:0005886	cytoplasm; "plasma membrane"	6.39982	5.74663	5.24242	4.12632	2.49119	2.79291	1.35783	1.33157	1.83039
Glyma.01G165200	Glyma01g37000	MLO-like protein	K7K476_SOYBN	0	AT1G11000.1	7e-157	Seven transmembrane MLO family protein	GO:0006952 GO:0008219	cell death; "defense response"	GO:0005516	calmodulin binding	GO:0005886 GO:0016021	integral to membrane; "plasma membrane"	0.850753	0.532757	0.498864	0.0969565	3.51759	4.07724	3.76548	3.59851	3.93606
Glyma.01G165600	Glyma01g37040	Thaumatin-like protein	G7JW96_MEDTR	8e-158	AT4G36010.2	4e-90	Pathogenesis-related thaumatin superfamily protein	GO:0006979 GO:0055114	oxidation-reduction process; "response to oxidative stress"	GO:0004601 GO:0016757 GO:0020037	heme binding; "peroxidase activity"; "transferase activity, transferring glycosyl groups"	GO:0005576 GO:0005618 GO:0005634 GO:0005737 GO:0009505 GO:0009506	cell wall; "cytoplasm"; "extracellular region"; "nucleus"; "plant-type cell wall"; "plasmodesma"	0.471783	0.567822	-1.15491	0.5	3.96011	5.07055	4.53381	4.26798	4.31135
Glyma.01G165900	Glyma01g37080	ARO1-like protein 1	B7FF14_MEDTR	0	AT5G66200.1	0	armadillo repeat only 2	GO:0008150	biological process	-	-	GO:0005737 GO:0005886	cytoplasm; "plasma membrane"	5.33825	4.7926	4.90584	4.89986	2.89925	2.18062	2.89497	3.01212	1.79287
Glyma.01G166100	Glyma01g37100	Calcium-dependent protein kinase	Q5D875_MEDTR	0	AT5G66210.1	0	calcium-dependent protein kinase 28	GO:0006468 GO:0010200	protein phosphorylation; "response to chitin"	GO:0004672 GO:0004674 GO:0004683 GO:0004713 GO:0005509 GO:0005524 GO:0016772	ATP binding; "calcium ion binding"; "calmodulin-dependent protein ki-se activity"; "protein ki-se activity"; "protein serine/threonine ki-se activity"; "protein tyrosine ki-se activity"; "transferase activity, transferring phosphorus-containing groups"	GO:0005886 GO:0009507	chloroplast; "plasma membrane"	8.68211	6.43658	6.31689	4.25719	3.01077	3.6411	3.62513	3.48762	3.12833
Glyma.01G167000	Glyma01g37215	Auxin-induced protein 6B	G7JW58_MEDTR	6e-64	AT2G21220.1	4e-51	SAUR-like auxin-responsive protein family	GO:0009733	response to auxin stimulus	GO:0005516	calmodulin binding	GO:0005739	mitochondrion	3.22903	2.41027	2.40966	0.46158	NA	NA	NA	NA	NA
Glyma.01G167400	#N/A	Zinc finger CCCH domain-containing protein	G7LCY7_MEDTR	5e-49	AT1G19860.1	0	Zinc finger C-x8-C-x5-C-x3-H type family protein	GO:0006071 GO:0006629 GO:0009860 GO:0030048	actin filament-based movement; "glycerol metabolic process"; "lipid metabolic process"; "pollen tube growth"	GO:0008081 GO:0008889	glycerophosphodiester phosphodiesterase activity; "phosphoric diester hydrolase activity"	GO:0005886 GO:0031225 GO:0048046	anchored to membrane; "apoplast"; "plasma membrane"	2.03712	1.69702	1.42406	3.03151	6.06528	7.53752	7.36524	6.80756	6.74528
Glyma.01G167500	Glyma01g37270	GDP-mannose 4 6-dehydratase	G7JW51_MEDTR	0	AT3G51160.1	0	NAD(P)-binding Rossmann-fold superfamily protein	GO:0006007 GO:0009826 GO:0019673 GO:0042351 GO:0044237	de novo' GDP-L-fucose biosynthetic process; "GDP-mannose metabolic process"; "cellular metabolic process"; "glucose catabolic process"; "unidimensio-l cell growth"	GO:0000166 GO:0003824 GO:0008446 GO:0050662	GDP-mannose 4,6-dehydratase activity; "catalytic activity"; "coenzyme binding"; "nucleotide binding"	GO:0005622 GO:0005794 GO:0005829	Golgi apparatus; "cytosol"; "intracellular"	8.80877	7.7774	7.72566	6.87766	4.67149	4.51068	5.15203	5.30374	5.12207
Glyma.01G167600	Glyma01g37290	-	-	-	AT5G66290.1	2e-85	unknown protein; FUNCTIONS IN: molecular_function unknown; INVOLVED IN: N-terminal protein myristoylation; LOCATED IN: cellular_component unknown; EXPRESSED IN: 14 plant structures; EXPRESSED DURING: 7 growth stages; Has 1807 Blast hits to 1807 proteins in 277 species: Archae - 0; Bacteria - 0; Metazoa - 736; Fungi - 347; Plants - 385; Viruses - 0; Other Eukaryotes - 339 (source: NCBI BLink).	GO:0006499	N-termi-l protein myristoylation	GO:0003674	molecular function	GO:0005739	mitochondrion	6.85805	6.6726	6.06513	6.05982	3.2986	4.14092	4.06949	4.21102	4.33927
Glyma.01G167700	#N/A	-	-	-	-	-	-	-	-	-	-	-	-	10.408	11.0912	11.2894	12.2865	12.9709	13.2966	13.8949	13.629	13.3653
Glyma.01G167800	Glyma01g37303	-	-	-	-	-	-	-	-	-	-	-	-	0.471783	0.567822	-0.0156059	1.10757	3.54837	3.64846	3.44647	3.37265	3.59504
Glyma.01G167900	Glyma01g37310	Transcription factor	E5KUH9_POPTR	0	AT2G18060.1	2e-160	vascular related NAC-domain protein 1	GO:0006355 GO:0009741 GO:0010089 GO:0010200	regulation of transcription, D--dependent; "response to brassinosteroid stimulus"; "response to chitin"; "xylem development"	GO:0003677 GO:0003700	D- binding; "sequence-specific D- binding transcription factor activity"	GO:0005634	nucleus	2.41347	3.12007	3.7391	2.94086	0.844749	1.02081	0.0047454	0.00190919	-1.07126
Glyma.01G168100	Glyma01g37330	Receptor-like protein kinase	C6FF70_SOYBN	0	AT4G36180.1	0	Leucine-rich receptor-like protein kinase family protein	GO:0000226 GO:0000911 GO:0002237 GO:0006260 GO:0006306 GO:0006468 GO:0007165 GO:0007169 GO:0008283 GO:0009855 GO:0010014 GO:0010073 GO:0010075 GO:0010103 GO:0030244 GO:0048443 GO:0051567	D- methylation; "D- replication"; "cell proliferation"; "cellulose biosynthetic process"; "cytokinesis by cell plate formation"; "determi-tion of bilateral symmetry"; "histone H3-K9 methylation"; "meristem initiation"; "meristem mainte-nce"; "microtubule cytoskeleton organization"; "protein phosphorylation"; "regulation of meristem growth"; "response to molecule of bacterial origin"; "sig-l trans…	GO:0004672 GO:0004674 GO:0005524 GO:0016301 GO:0016772	ATP binding; "ki-se activity"; "protein ki-se activity"; "protein serine/threonine ki-se activity"; "transferase activity, transferring phosphorus-containing groups"	GO:0005886	plasma membrane	1.94327	1.44024	0.698777	-0.52691	NA	NA	NA	NA	NA
Glyma.01G168200	Glyma01g37341	Kinesin motor family protein	B9MXI7_POPTR	0	AT3G51150.2	0	ATP binding microtubule motor family protein	GO:0007018	microtubule-based movement	GO:0003777 GO:0005524	ATP binding; "microtubule motor activity"	GO:0005737	cytoplasm	8.82662	5.65051	5.29547	2.37216	-1.35736	0.574819	1.00604	1.00061	0.55635
Glyma.01G168500	Glyma01g37370	Zinc finger protein CONSTANS-like protein	G7KGE4_MEDTR	1e-111	AT4G38960.3	2e-69	B-box type zinc finger family protein	GO:0006355 GO:0007623 GO:0009411 GO:0009813	circadian rhythm; "flavonoid biosynthetic process"; "regulation of transcription, D--dependent"; "response to UV"	GO:0003700 GO:0008270	sequence-specific D- binding transcription factor activity; "zinc ion binding"	GO:0005622 GO:0005634	intracellular; "nucleus"	6.92756	7.46476	7.3857	7.45306	5.07326	4.94078	5.81502	5.7298	6.2265
Glyma.01G169600	Glyma01g37470	MADS box protein AP3-like	Q533S2_LOTJA	2e-144	AT3G54340.1	2e-61	K-box region and MADS-box transcription factor family protein	GO:0006355 GO:0009827 GO:0009860 GO:0009886 GO:0009909 GO:0010093 GO:0048440 GO:0048441 GO:0048443 GO:0048481 GO:0048507	carpel development; "meristem development"; "ovule development"; "petal development"; "plant-type cell wall modification"; "pollen tube growth"; "post-embryonic morphogenesis"; "regulation of flower development"; "regulation of transcription, D--dependent"; "specification of floral organ identity"; "stamen development"	GO:0003677 GO:0003700 GO:0046983	D- binding; "protein dimerization activity"; "sequence-specific D- binding transcription factor activity"	GO:0005634	nucleus	5.69066	2.89234	2.63553	-1.52331	NA	NA	NA	NA	NA
Glyma.01G169900	Glyma01g37500	Similar to CDK5 regulatory subunit-associated protein	Q75WU8_TOBAC	0	AT4G36390.1	0	Methylthiotransferase	GO:0006400 GO:0006655 GO:0007131 GO:0009073 GO:0009451 GO:0009691 GO:0009793 GO:0010155 GO:0016226 GO:0043412 GO:0046777	R- modification; "aromatic amino acid family biosynthetic process"; "cytokinin biosynthetic process"; "embryo development ending in seed dormancy"; "iron-sulfur cluster assembly"; "macromolecule modification"; "phosphatidylglycerol biosynthetic process"; "protein autophosphorylation"; "reciprocal meiotic recombi-tion"; "regulation of proton transport"; "tR- modification"	GO:0003824 GO:0016740 GO:0051536 GO:0051539	4 iron, 4 sulfur cluster binding; "catalytic activity"; "iron-sulfur cluster binding"; "transferase activity"	GO:0005737 GO:0009507	chloroplast; "cytoplasm"	7.02003	8.42636	8.3726	8.32864	6.24564	5.40854	5.1949	5.27654	5.37492
Glyma.01G170200	Glyma01g37541	Beta-galactosidase	K7K4B2_SOYBN	0	AT4G36360.1	0	beta-galactosidase 3	GO:0005975 GO:0005990 GO:0006598 GO:0009664 GO:0009698 GO:0009832 GO:0010075 GO:0019513 GO:0019515 GO:0042398	carbohydrate metabolic process; "cellular modified amino acid biosynthetic process"; "lactose catabolic process"; "lactose catabolic process, using glucoside 3-dehydroge-se"; "lactose catabolic process via UDP-galactose"; "phenylpropanoid metabolic process"; "plant-type cell wall biogenesis"; "plant-type cell wall organization"; "polyamine catabolic process"; "regulation of meristem growth"	GO:0003824 GO:0004553 GO:0004565 GO:0030246 GO:0043169	beta-galactosidase activity; "carbohydrate binding"; "catalytic activity"; "cation binding"; "hydrolase activity, hydrolyzing O-glycosyl compounds"	GO:0005576	extracellular region	8.67889	5.23271	4.79451	1.88928	-0.639723	NA	-1.10717	-1.08887	-0.927841
Glyma.01G170300	Glyma01g37550	Thioredoxin	I1J8Q1_SOYBN	1e-80	AT3G51030.1	3e-63	thioredoxin H-type 1	GO:0006662 GO:0043085 GO:0045454	cell redox homeostasis; "glycerol ether metabolic process"; "positive regulation of catalytic activity"	GO:0008047 GO:0009055 GO:0015035 GO:0016671	electron carrier activity; "enzyme activator activity"; "oxidoreductase activity, acting on a sulfur group of donors, disulfide as acceptor"; "protein disulfide oxidoreductase activity"	GO:0005737 GO:0005829 GO:0048046	apoplast; "cytoplasm"; "cytosol"	5.511	6.42413	6.64344	5.99881	2.8275	1.30728	3.22109	3.42688	2.91814
Glyma.01G171000	Glyma01g37620	NBS-LRR protein	W0LWQ3_CICAR	0	AT5G35450.1	7e-139	Disease resistance protein (CC-NBS-LRR class) family	GO:0006952	defense response	GO:0043531	ADP binding	GO:0005886	plasma membrane	6.96921	6.04172	5.82811	4.67105	3.46316	3.81783	3.15562	3.16905	3.29249
Glyma.01G171400	Glyma01g37670	Cell division protease ftsH-like protein	G7KF09_MEDTR	0	AT5G17760.1	3e-179	P-loop containing nucleoside triphosphate hydrolases superfamily protein	GO:0009627 GO:0009697	salicylic acid biosynthetic process; "systemic acquired resistance"	GO:0000166 GO:0005524 GO:0017111	ATP binding; "nucleoside-triphosphatase activity"; "nucleotide binding"	GO:0005886	plasma membrane	3.02506	1.7368	1.41053	-1.52331	-0.362116	0.592839	0.54722	0.563364	0.618643
Glyma.01G171900	Glyma01g37720	Mannan endo-1,4-beta-mannosidase	G7KF03_MEDTR	0	AT5G66460.1	0	Glycosyl hydrolase superfamily protein	GO:0008152 GO:0009845 GO:0009855 GO:0009944 GO:0010014 GO:0010075	determi-tion of bilateral symmetry; "meristem initiation"; "metabolic process"; "polarity specification of adaxial/abaxial axis"; "regulation of meristem growth"; "seed germi-tion"	GO:0004553 GO:0016985	hydrolase activity, hydrolyzing O-glycosyl compounds; "man-n endo-1,4-beta-mannosidase activity"	GO:0005576 GO:0071944	cell periphery; "extracellular region"	4.74272	4.84984	4.27536	5.00136	3.14702	2.85853	2.56112	2.58265	1.75551
Glyma.01G172000	Glyma01g37730	mRNA, clone: RTFL01-19-N09	E4MWY4_THEHA	2e-102	AT3G50910.1	1e-102	unknown protein; BEST Arabidopsis thaliana protein match is: unknown protein (TAIR:AT5G66480.1); Has 76 Blast hits to 75 proteins in 28 species: Archae - 0; Bacteria - 10; Metazoa - 7; Fungi - 2; Plants - 49; Viruses - 0; Other Eukaryotes - 8 (source: NCBI BLink).	GO:0008150 GO:0009407 GO:0010200 GO:0010583	biological process; "response to chitin"; "response to cyclopentenone"; "toxin catabolic process"	GO:0003674	molecular function	GO:0005634	nucleus	7.67911	10.5652	9.9451	11.3574	12.0303	12.7151	12.6043	12.6919	12.3934
Glyma.01G172200	Glyma01g37760	Auxilin-like protein	E5GCI8_CUCME	1e-93	AT4G36520.1	5e-96	Chaperone DnaJ-domain superfamily protein	-	-	GO:0031072	heat shock protein binding	-	-	11.0434	8.35984	8.43246	5.80573	4.09848	4.4567	5.27699	5.28538	4.92855
Glyma.01G172400	Glyma01g37790	Soluble inorganic pyrophosphatase	G7KEZ5_MEDTR	5e-137	AT1G01050.1	1e-124	pyrophosphorylase 1	GO:0000394 GO:0008152 GO:0009086 GO:0019915	R- splicing, via endonucleolytic cleavage and ligation; "lipid storage"; "metabolic process"; "methionine biosynthetic process"	GO:0000287 GO:0004427	inorganic diphosphatase activity; "magnesium ion binding"	GO:0005634 GO:0005737 GO:0005829 GO:0016020	cytoplasm; "cytosol"; "membrane"; "nucleus"	7.41385	7.60082	7.34334	6.61713	4.20979	4.89938	5.12074	5.02684	4.64543
Glyma.01G172600	Glyma01g37810	NADPH:isoflavone reductase	O48601_SOYBN	0	AT4G39230.1	8e-115	NmrA-like negative transcriptional regulator family protein	GO:0046686	response to cadmium ion	GO:0000166 GO:0032442	nucleotide binding; "phenylcoumaran benzylic ether reductase activity"	GO:0005737	cytoplasm	4.35362	4.37792	4.32269	3.95306	0.760157	-1.01334	NA	NA	NA
Glyma.01G172800	Glyma01g37840	Isoflavone reductase homolog 1	Q9SDZ1_SOYBN	0	AT1G75280.1	4e-142	NmrA-like negative transcriptional regulator family protein	GO:0006979 GO:0046686	response to cadmium ion; "response to oxidative stress"	GO:0000166	nucleotide binding	GO:0005737 GO:0005886	cytoplasm; "plasma membrane"	9.43746	5.05385	5.50748	0.5	NA	NA	NA	NA	NA
Glyma.01G173000	Glyma01g37860	Phosphopantetheine adenylyltransferase	G7KEY2_MEDTR	4e-72	AT2G18245.1	5e-89	alpha/beta-Hydrolases superfamily protein	GO:0008150	biological process	GO:0003674	molecular function	GO:0005575	cellular component	6.17544	6.61704	6.26803	8.18948	8.90807	9.20975	9.32351	9.42761	9.13007
Glyma.01G173100	Glyma01g37880	Syntaxin-112	G7KEY1_MEDTR	8e-161	AT2G18260.1	3e-131	syntaxin of plants 112	GO:0006886 GO:0006944 GO:0009409 GO:0016192	cellular membrane fusion; "intracellular protein transport"; "response to cold"; "vesicle-mediated transport"	GO:0005484	S-P receptor activity	GO:0005634 GO:0005886 GO:0016020	membrane; "nucleus"; "plasma membrane"	NA	NA	NA	-0.47091	1.96727	2.96619	2.69559	2.57724	2.8743
Glyma.01G173300	Glyma01g37900	Apospory-associated protein	G7KEX7_MEDTR	0	AT5G66530.2	4e-170	Galactose mutarotase-like superfamily protein	GO:0005975 GO:0006012	carbohydrate metabolic process; "galactose metabolic process"	GO:0003824 GO:0004034 GO:0016853 GO:0030246	aldose 1-epimerase activity; "carbohydrate binding"; "catalytic activity"; "isomerase activity"	GO:0009507 GO:0009570 GO:0048046	apoplast; "chloroplast"; "chloroplast stroma"	9.51744	9.42673	9.43804	8.86596	7.15722	7.46541	7.25515	7.32809	7.38366
Glyma.01G173600	Glyma01g37930	Laccase-11	G7KEX3_MEDTR	0	AT5G03260.1	0	laccase 11	GO:0010413 GO:0045492 GO:0046274 GO:0055114	glucuronoxylan metabolic process; "lignin catabolic process"; "oxidation-reduction process"; "xylan biosynthetic process"	GO:0005507 GO:0016491 GO:0052716	copper ion binding; "hydroquinone:oxygen oxidoreductase activity"; "oxidoreductase activity"	GO:0005576 GO:0048046	apoplast; "extracellular region"	4.21395	2.66126	2.78138	0.0555561	NA	NA	NA	NA	NA
Glyma.01G174100	#N/A	LEA-like protein	Q8L5P5_LILLO	3e-12	AT4G36600.1	2e-13	Late embryogenesis abundant (LEA) protein	GO:0009793 GO:0048445	carpel morphogenesis; "embryo development ending in seed dormancy"	GO:0003674	molecular function	-	-	9.09485	11.537	11.4761	11.0365	9.07495	7.90898	8.03361	8.55062	8.19565
Glyma.01G175000	Glyma01g38105	Receptor protein kinase PERK1	G7LEU4_MEDTR	0	AT4G34440.1	0	Protein kinase superfamily protein	GO:0006468 GO:0009827 GO:0009860 GO:0046777 GO:0048610 GO:0048868 GO:0051510	cellular process involved in reproduction; "plant-type cell wall modification"; "pollen tube development"; "pollen tube growth"; "protein autophosphorylation"; "protein phosphorylation"; "regulation of unidimensio-l cell growth"	GO:0004672 GO:0004674 GO:0005524 GO:0016301 GO:0016772	ATP binding; "ki-se activity"; "protein ki-se activity"; "protein serine/threonine ki-se activity"; "transferase activity, transferring phosphorus-containing groups"	GO:0005886	plasma membrane	3.21889	2.05728	2.01955	-0.52691	-1.35736	-1.01334	-1.10717	-1.08887	NA
Glyma.01G175500	Glyma01g38180	Cytochrome P450	G7KDI9_MEDTR	0	AT3G50660.1	0	Cytochrome P450 superfamily protein	GO:0009741 GO:0009753 GO:0009826 GO:0009867 GO:0010358 GO:0016126 GO:0016132 GO:0048366 GO:0055114	brassinosteroid biosynthetic process; "jasmonic acid mediated sig-ling pathway"; "leaf development"; "leaf shaping"; "oxidation-reduction process"; "response to brassinosteroid stimulus"; "response to jasmonic acid stimulus"; "sterol biosynthetic process"; "unidimensio-l cell growth"	GO:0005506 GO:0009055 GO:0010012 GO:0016705 GO:0020037	electron carrier activity; "heme binding"; "iron ion binding"; "oxidoreductase activity, acting on paired donors, with incorporation or reduction of molecular oxygen"; "steroid 22-alpha hydroxylase activity"	GO:0005783	endoplasmic reticulum	-0.53121	0.0103776	0.171962	0.5	1.67486	2.02495	1.96491	1.99239	1.58888
Glyma.01G175800	Glyma01g38220	-	-	-	-	-	-	-	-	-	-	-	-	7.32244	4.81467	5.02233	2.0923	2.09154	2.63718	2.15869	2.16598	1.54812
Glyma.01G175900	Glyma01g38230	Protein FAM96A	G7KDK0_MEDTR	2e-75	AT3G50845.1	1e-80	Protein of unknown function (DUF59)	GO:0008150	biological process	GO:0003674	molecular function	GO:0005634	nucleus	8.19741	7.0735	6.71962	5.73853	5.4258	5.51472	5.50563	5.34046	5.27489
Glyma.01G176200	Glyma01g38260	-	-	-	AT2G21640.1	1e-11	Encodes a protein of unknown function that is a marker for oxidative stress response.	GO:0006979	response to oxidative stress	GO:0003674	molecular function	GO:0005634 GO:0005739	mitochondrion; "nucleus"	7.29955	4.49673	4.92225	2.28731	2.57702	3.34497	3.04961	2.88594	3.10458
Glyma.01G176300	Glyma01g38270	ADP-ribosylation factor	B7FHH1_MEDTR	3e-126	AT2G18390.1	1e-117	ADP-ribosylation factor family protein	GO:0000226 GO:0006886 GO:0007021 GO:0007264 GO:0009558 GO:0009630 GO:0009793 GO:0009960	embryo development ending in seed dormancy; "embryo sac cellularization"; "endosperm development"; "gravitropism"; "intracellular protein transport"; "microtubule cytoskeleton organization"; "small GTPase mediated sig-l transduction"; "tubulin complex assembly"	GO:0003924 GO:0005525	GTP binding; "GTPase activity"	GO:0005622 GO:0005794	Golgi apparatus; "intracellular"	6.16083	4.00423	4.17778	2.28731	2.09154	3.20039	3.23918	3.1505	2.82265
Glyma.01G177000	Glyma01g38340	Vicilin-like antimicrobial peptides 2-3	G7KC87_MEDTR	0	AT2G18540.1	6e-114	RmlC-like cupins superfamily protein	GO:0008150	biological process	GO:0045735	nutrient reservoir activity	-	-	12.7719	13.6056	13.6056	12.9128	11.7727	10.9814	11.2465	11.6045	11.5422
Glyma.01G177100	Glyma01g38350	Mitochondrial catalytic protein	G7ZW33_MEDTR	4e-157	AT4G16580.1	4e-126	Protein phosphatase 2C family protein	-	-	GO:0003824	catalytic activity	GO:0005739	mitochondrion	3.37403	4.01758	2.60255	4.67932	1.49911	1.35684	1.48808	1.55496	-1.07126
Glyma.01G177200	Glyma01g38360	GRAS family transcription factor	G7LEV2_MEDTR	0	AT4G36710.1	5e-163	GRAS family transcription factor	GO:0006355 GO:0030154 GO:0048831	cell differentiation; "regulation of shoot system development"; "regulation of transcription, D--dependent"	GO:0003700	sequence-specific D- binding transcription factor activity	GO:0005634	nucleus	6.40054	5.24153	5.17149	3.95955	3.25235	3.15029	2.95323	3.00407	2.4501
Glyma.01G177400	Glyma01g38381	G-box binding factor	Q43449_SOYBN	0	AT4G36730.1	6e-100	G-box binding factor 1	GO:0006351 GO:0006355 GO:0010310 GO:0010629 GO:0090342	negative regulation of gene expression; "regulation of cell aging"; "regulation of hydrogen peroxide metabolic process"; "regulation of transcription, D--dependent"; "transcription, D--dependent"	GO:0003677 GO:0003700 GO:0043565 GO:0046983	D- binding; "protein dimerization activity"; "sequence-specific D- binding"; "sequence-specific D- binding transcription factor activity"	GO:0005634 GO:0005737	cytoplasm; "nucleus"	7.30249	6.76832	6.56848	6.04517	4.38497	4.64938	4.88807	4.95103	4.7174
Glyma.01G177500	Glyma01g38390	Homeodomain leucine zipper protein	G7KC72_MEDTR	4e-101	AT4G36740.1	1e-71	homeobox protein 40	GO:0006355 GO:0009733	regulation of transcription, D--dependent; "response to auxin stimulus"	GO:0000976 GO:0003677 GO:0003700 GO:0043565	D- binding; "sequence-specific D- binding"; "sequence-specific D- binding transcription factor activity"; "transcription regulatory region sequence-specific D- binding"	GO:0005634	nucleus	4.63997	3.1085	2.46816	0.774788	NA	NA	NA	NA	NA
Glyma.01G177600	Glyma01g38400	Quinone reductase family protein	B9HET4_POPTR	1e-131	AT4G36750.1	2e-127	Quinone reductase family protein	GO:0045892	negative regulation of transcription, D--dependent	GO:0010181 GO:0016491	FMN binding; "oxidoreductase activity"	GO:0005737 GO:0005886	cytoplasm; "plasma membrane"	7.36803	5.24225	5.40117	3.4361	4.30866	4.63451	4.36465	4.29563	4.27185
Glyma.01G177700	Glyma01g38410	Xaa-Pro aminopeptidase 2	G3E7N0_SOYBN	0	AT4G36760.1	0	aminopeptidase P1	GO:0006487 GO:0006869 GO:0006891 GO:0009926 GO:0009987 GO:0010351 GO:0016558	auxin polar transport; "cellular process"; "intra-Golgi vesicle-mediated transport"; "lipid transport"; "lithium ion transport"; "protein N-linked glycosylation"; "protein import into peroxisome matrix"	GO:0004177 GO:0010013 GO:0016787	N-1--phthylphthalamic acid binding; "aminopeptidase activity"; "hydrolase activity"	GO:0005829 GO:0005886	cytosol; "plasma membrane"	12.3338	10.9523	10.8485	9.12503	7.79513	8.21326	7.95864	8.01215	7.82728
Glyma.01G177800	#N/A	F-box/kelch-repeat protein	G7IYP6_MEDTR	1e-24	AT4G12560.2	6e-10	F-box and associated interaction domains-containing protein	GO:0031348 GO:0042177	negative regulation of defense response; "negative regulation of protein catabolic process"	GO:0003674 GO:0005515	molecular function; "protein binding"	GO:0005634 GO:0005737	cytoplasm; "nucleus"	0.0674245	-0.0206707	1.10904	-1.52331	NA	NA	NA	NA	NA
Glyma.01G177900	Glyma01g38430	Glycosyltransferase GT01K01	E9M5E5_PUEML	0	AT3G50740.1	1e-152	UDP-glucosyl transferase 72E1	GO:0006520 GO:0006569 GO:0008152 GO:0009684 GO:0009808 GO:0010167 GO:0015706	cellular amino acid metabolic process; "indoleacetic acid biosynthetic process"; "lignin metabolic process"; "metabolic process"; "nitrate transport"; "response to nitrate"; "tryptophan catabolic process"	GO:0008194 GO:0016757 GO:0016758 GO:0047209	UDP-glycosyltransferase activity; "coniferyl-alcohol glucosyltransferase activity"; "transferase activity, transferring glycosyl groups"; "transferase activity, transferring hexosyl groups"	-	-	3.29833	6.28857	6.69092	7.13065	6.28701	6.40106	6.87454	6.9789	6.53551
Glyma.01G178000	Glyma01g38450	BES1/BZR1-like protein	G7KC60_MEDTR	1e-132	AT1G75080.2	2e-96	Brassinosteroid signalling positive regulator (BZR1) family protein	GO:0006355 GO:0009742 GO:0045892 GO:0048316 GO:0048481	brassinosteroid mediated sig-ling pathway; "negative regulation of transcription, D--dependent"; "ovule development"; "regulation of transcription, D--dependent"; "seed development"	GO:0003677 GO:0003700 GO:0005515	D- binding; "protein binding"; "sequence-specific D- binding transcription factor activity"	GO:0005634 GO:0005829	cytosol; "nucleus"	9.68123	9.95807	9.78296	9.44133	8.14299	6.82807	6.31914	6.64224	6.24098
Glyma.01G178100	Glyma01g38460	Major facilitator protein	O23203_ARATH	0	AT4G36790.1	0	Major facilitator superfamily protein	GO:0015706 GO:0055085	nitrate transport; "transmembrane transport"	GO:0005351 GO:0015144	carbohydrate transmembrane transporter activity; "sugar:hydrogen symporter activity"	GO:0005739 GO:0016020 GO:0016021	integral to membrane; "membrane"; "mitochondrion"	4.52857	2.78936	3.02707	0.0555561	3.40836	4.06224	3.52571	3.43518	3.57288
Glyma.01G178400	Glyma01g38490	-	-	-	AT2G18630.1	2e-133	Protein of unknown function (DUF677)	GO:0006499	N-termi-l protein myristoylation	-	-	GO:0005634 GO:0005737 GO:0005777 GO:0005886	cytoplasm; "nucleus"; "peroxisome"; "plasma membrane"	7.24629	5.50612	5.49539	4.35063	3.60878	3.87326	3.36334	3.30668	3.30704
Glyma.01G178500	Glyma01g38500	Coiled-coil domain-containing protein 109A	G7KAV9_MEDTR	6e-137	AT2G23790.1	6e-109	Protein of unknown function (DUF607)	GO:0008150	biological process	GO:0003674	molecular function	GO:0009507	chloroplast	7.29758	5.70527	5.55483	5.5589	4.13711	4.77374	3.98488	3.93648	3.95619
Glyma.01G178800	Glyma01g38530	PQ-loop repeat family protein	U5G8H3_POPTR	8e-176	AT4G36850.1	1e-172	PQ-loop repeat family protein / transmembrane family protein	GO:0008150	biological process	-	-	GO:0016020	membrane	7.32772	5.37895	5.21018	3.50981	3.20097	3.73922	3.53638	3.28513	3.89616
Glyma.01G179000	Glyma01g38550	LYK4	A5YJW2_SOYBN	0	AT2G23770.1	4e-168	protein kinase family protein / peptidoglycan-binding LysM domain-containing protein	GO:0045087 GO:0071219 GO:0071323	cellular response to chitin; "cellular response to molecule of bacterial origin"; "in-te immune response"	GO:0008061 GO:0016301	chitin binding; "ki-se activity"	GO:0005886 GO:0009507	chloroplast; "plasma membrane"	3.01756	1.96673	1.6744	-0.52691	NA	NA	NA	NA	NA
Glyma.01G179200	Glyma01g38570	Pentatricopeptide repeat-containing protein	G7KAT3_MEDTR	0	AT5G66631.1	0	Tetratricopeptide repeat (TPR)-like superfamily protein	GO:0008150	biological process	GO:0003674	molecular function	GO:0009507	chloroplast	4.11736	3.89701	3.91035	3.5359	2.3027	2.63718	1.1338	1.06224	1.54812
Glyma.01G179300	Glyma01g38580	Clathrin heavy chain	I1J8Z9_SOYBN	0	AT3G11130.1	0	Clathrin, heavy chain	GO:0006886 GO:0006897 GO:0016192	endocytosis; "intracellular protein transport"; "vesicle-mediated transport"	GO:0005198 GO:0005515	protein binding; "structural molecule activity"	GO:0005773 GO:0005774 GO:0005794 GO:0005886 GO:0009506 GO:0030130 GO:0030132	Golgi apparatus; "clathrin coat of coated pit"; "clathrin coat of trans-Golgi network vesicle"; "plasma membrane"; "plasmodesma"; "vacuolar membrane"; "vacuole"	7.82003	5.57864	5.25761	3.6956	1.29575	2.26151	2.40616	2.3216	2.09318
Glyma.01G179500	Glyma01g38600	Cytochrome P450	G7KAT1_MEDTR	0	AT3G26300.1	3e-134	cytochrome P450, family 71, subfamily B, polypeptide 34	GO:0055114	oxidation-reduction process	GO:0005506 GO:0009055 GO:0016705 GO:0019825 GO:0020037	electron carrier activity; "heme binding"; "iron ion binding"; "oxidoreductase activity, acting on paired donors, with incorporation or reduction of molecular oxygen"; "oxygen binding"	-	-	0.0389396	0.610153	-0.860516	2.0121	NA	-0.986998	-0.891919	-0.91204	-1.07126
Glyma.01G180000	Glyma01g38660	-	-	-	AT3G50780.1	0	BEST Arabidopsis thaliana protein match is: BTB/POZ domain-containing protein (TAIR:AT1G63850.1); Has 298 Blast hits to 298 proteins in 22 species: Archae - 0; Bacteria - 0; Metazoa - 10; Fungi - 0; Plants - 287; Viruses - 0; Other Eukaryotes - 1 (source: NCBI BLink).	GO:0008150	biological process	-	-	GO:0005634	nucleus	6.81017	6.04626	5.76505	5.19619	3.60878	4.07724	4.20114	4.2085	3.99243
Glyma.01G180200	Glyma01g38680	-	-	-	AT5G66600.3	0	Protein of unknown function, DUF547	GO:0008150	biological process	GO:0003674	molecular function	GO:0005634	nucleus	5.12554	2.64781	2.38387	0.856474	-0.362116	0.00114721	-0.114753	-0.081287	-0.927841
Glyma.01G180500	Glyma01g38720	-	-	-	AT2G23690.1	5e-48	unknown protein; FUNCTIONS IN: molecular_function unknown; INVOLVED IN: N-terminal protein myristoylation; LOCATED IN: cellular_component unknown; EXPRESSED IN: 7 plant structures; EXPRESSED DURING: petal differentiation and expansion stage; BEST Arabidopsis thaliana protein match is: unknown protein (TAIR:AT4G37240.1); Has 243 Blast hits to 243 proteins in 15 species: Archae - 0; Bacteria - 0; M…	GO:0006499	N-termi-l protein myristoylation	GO:0003674	molecular function	GO:0005575	cellular component	3.79556	3.61216	2.9995	2.38857	0.0476376	-1.01334	-0.114753	-0.081287	-0.927841
Glyma.01G180800	Glyma01g38750	Oxygen-evolving enhancer protein 1	T2DNJ8_PHAVU	0	AT3G50820.1	0	photosystem II subunit O-2	GO:0000165 GO:0006098 GO:0006355 GO:0006364 GO:0006612 GO:0009617 GO:0009657 GO:0009773 GO:0009862 GO:0009867 GO:0009902 GO:0009965 GO:0010027 GO:0010205 GO:0010207 GO:0010310 GO:0010363 GO:0015979 GO:0019684 GO:0019761 GO:0030003 GO:0030154 GO:0031348 GO:0035304 GO:0042549 GO:0042742 GO:0042793 GO:0045893 GO:0070838	MAPK cascade; "cell differentiation"; "cellular cation homeostasis"; "chloroplast relocation"; "defense response to bacterium"; "divalent metal ion transport"; "glucosinolate biosynthetic process"; "jasmonic acid mediated sig-ling pathway"; "leaf morphogenesis"; "negative regulation of defense response"; "pentose-phosphate shunt"; "photoinhibition"; "photosynthesis"; "photosynthesis, light reacti…	GO:0005509 GO:0005515 GO:0008266 GO:0010242	calcium ion binding; "oxygen evolving activity"; "poly(U) R- binding"; "protein binding"	GO:0009507 GO:0009534 GO:0009535 GO:0009543 GO:0009570 GO:0009579 GO:0009654 GO:0010287 GO:0030095 GO:0031977	chloroplast; "chloroplast photosystem II"; "chloroplast stroma"; "chloroplast thylakoid"; "chloroplast thylakoid lumen"; "chloroplast thylakoid membrane"; "oxygen evolving complex"; "plastoglobule"; "thylakoid"; "thylakoid lumen"	11.2916	6.6238	6.76915	2.3276	1.4615	2.23513	2.55749	2.45566	2.5331
Glyma.01G181500	Glyma01g38840	Peroxidase A	G7K9F1_MEDTR	0	AT4G37130.1	0	hydroxyproline-rich glycoprotein family protein	GO:0008150	biological process	GO:0005515	protein binding	GO:0005634 GO:0005635	nuclear envelope; "nucleus"	7.92514	7.12785	6.92246	6.49842	4.91927	5.02708	4.68046	4.79214	4.57344
Glyma.01G181700	Glyma01g38860	Zinc-finger domain of monoamine-oxidase A repressor R1	Q1PF11_ARATH	8e-101	AT2G23530.1	9e-104	Zinc-finger domain of monoamine-oxidase A repressor R1	GO:0008150	biological process	GO:0003674	molecular function	GO:0005634	nucleus	2.7482	1.38735	1.56186	NA	-1.35736	-0.000621929	0.54722	0.563364	-1.07126
Glyma.01G181800	Glyma01g38870	CYP82C1p	O48925_SOYBN	0	AT4G31940.1	0	cytochrome P450, family 82, subfamily C, polypeptide 4	GO:0010043 GO:0055114 GO:0071281	cellular response to iron ion; "oxidation-reduction process"; "response to zinc ion"	GO:0004497 GO:0005506 GO:0009055 GO:0016705 GO:0019825 GO:0020037	electron carrier activity; "heme binding"; "iron ion binding"; "monooxyge-se activity"; "oxidoreductase activity, acting on paired donors, with incorporation or reduction of molecular oxygen"; "oxygen binding"	GO:0009507	chloroplast	2.3008	4.68814	4.84201	4.70898	5.54975	5.92203	5.93999	6.39421	6.06688
Glyma.01G182100	Glyma01g38900	Guanine nucleotide-binding protein subunit beta-like protein	G7K9G1_MEDTR	0	AT2G26490.1	6e-167	Transducin/WD40 repeat-like superfamily protein	GO:0006944 GO:0008150	biological process; "cellular membrane fusion"	GO:0000166	nucleotide binding	GO:0005737 GO:0005834	cytoplasm; "heterotrimeric G-protein complex"	2.78592	1.62349	1.56186	-1.52331	1.49911	1.60921	1.29906	1.31204	1.34794
Glyma.01G182200	Glyma01g38905	-	-	-	AT5G66985.1	2e-09	unknown protein; Has 30201 Blast hits to 17322 proteins in 780 species: Archae - 12; Bacteria - 1396; Metazoa - 17338; Fungi - 3422; Plants - 5037; Viruses - 0; Other Eukaryotes - 2996 (source: NCBI BLink).	GO:0008150	biological process	GO:0003674	molecular function	GO:0005739	mitochondrion	7.49949	3.76087	3.934	-1.52331	0.617159	1.60921	1.00604	1.00061	-0.0798389
Glyma.01G183200	Glyma01g38990	Reticulon-like protein	I1J938_SOYBN	9e-111	AT2G23640.1	5e-30	Reticulan like protein B13	GO:0071786	endoplasmic reticulum tubular network organization	GO:0003674	molecular function	GO:0005634 GO:0005783 GO:0005789 GO:0071458 GO:0071782	endoplasmic reticulum; "endoplasmic reticulum membrane"; "endoplasmic reticulum tubular network"; "integral to cytosolic side of endoplasmic reticulum membrane"; "nucleus"	9.90661	13.0577	13.3298	11.7098	10.3906	10.1666	10.9949	10.8291	10.8513
Glyma.01G183400	Glyma01g39010	NBS-LRR protein	W0M160_CICAR	0	AT5G66900.1	4e-150	Disease resistance protein (CC-NBS-LRR class) family	GO:0006952	defense response	GO:0043531	ADP binding	GO:0005634	nucleus	8.8302	7.75497	7.56679	7.3413	5.49739	4.98605	4.99742	5.17187	5.03134
Glyma.01G184300	Glyma01g39090	CROOKED family protein	B9H6E4_POPTR	0	AT3G50530.1	0	CDPK-related kinase	GO:0006468 GO:0006499 GO:0010228 GO:0016926 GO:0050665	N-termi-l protein myristoylation; "hydrogen peroxide biosynthetic process"; "protein desumoylation"; "protein phosphorylation"; "vegetative to reproductive phase transition of meristem"	GO:0004672 GO:0004674 GO:0004713 GO:0004723 GO:0005509 GO:0005524 GO:0016301 GO:0016772	ATP binding; "calcium-dependent protein serine/threonine phosphatase activity"; "calcium ion binding"; "ki-se activity"; "protein ki-se activity"; "protein serine/threonine ki-se activity"; "protein tyrosine ki-se activity"; "transferase activity, transferring phosphorus-containing groups"	GO:0005886	plasma membrane	6.29757	3.66754	3.81077	0.46158	-0.362116	0.00114721	-0.114753	-0.081287	NA
Glyma.01G184500	Glyma01g39110	Vascular protein	G7ZY41_MEDTR	0	AT3G50590.1	0	Transducin/WD40 repeat-like superfamily protein	GO:0008150	biological process	GO:0000166	nucleotide binding	GO:0005886	plasma membrane	3.5521	2.68168	2.68793	1.275	-0.639723	0.565058	1.07372	1.02918	0.951408
Glyma.01G184600	Glyma01g39120	-	-	-	AT4G37080.3	0	Protein of unknown function, DUF547	GO:0008150	biological process	GO:0003674	molecular function	GO:0005634	nucleus	2.88844	2.41286	2.60255	1.275	-1.35736	-1.01334	NA	NA	NA
Glyma.01G185400	Glyma01g39220	Cyclin-dependent kinase inhibitor 1;2	Q6T2Z2_SOYBN	3e-141	AT1G49620.1	2e-17	Cyclin-dependent kinase inhibitor family protein	GO:0000278 GO:0007050 GO:0010440 GO:0042023 GO:0045736	D- endoreduplication; "cell cycle arrest"; "mitotic cell cycle"; "negative regulation of cyclin-dependent protein serine/threonine ki-se activity"; "stomatal lineage progression"	GO:0004861 GO:0005515 GO:0030332	cyclin-dependent protein serine/threonine ki-se inhibitor activity; "cyclin binding"; "protein binding"	GO:0001673 GO:0005634	male germ cell nucleus; "nucleus"	7.53463	4.23873	3.70179	0.46158	0.503705	0.00114721	-0.114753	-0.081287	NA
Glyma.01G185600	Glyma01g39240	Calcium-binding protein CML24	G7K7Z2_MEDTR	1e-95	AT2G15680.1	6e-46	Calcium-binding EF-hand family protein	GO:0008150	biological process	GO:0005509	calcium ion binding	GO:0005739 GO:0005886	mitochondrion; "plasma membrane"	5.11024	2.85486	2.4192	-0.52691	NA	NA	NA	NA	NA
Glyma.01G185700	Glyma01g39250	ATP-dependent RNA helicase eIF4A	G7K6Q4_MEDTR	1e-115	AT4G37020.1	9e-79	BEST Arabidopsis thaliana protein match is: eukaryotic initiation factor 4A-III (TAIR:AT3G19760.1); Has 30201 Blast hits to 17322 proteins in 780 species: Archae - 12; Bacteria - 1396; Metazoa - 17338; Fungi - 3422; Plants - 5037; Viruses - 0; Other Eukaryotes - 2996 (source: NCBI BLink).	GO:0008150	biological process	GO:0003674	molecular function	GO:0005634	nucleus	7.11543	6.06724	6.07598	5.23773	3.92904	4.30502	3.94835	3.88511	4.53546
Glyma.01G185900	Glyma01g39270	-	-	-	AT4G33985.1	9e-42	Protein of unknown function (DUF1685)	GO:0008150 GO:0010286	biological process; "heat acclimation"	GO:0003674	molecular function	GO:0005634	nucleus	9.41267	10.4753	10.6799	9.65674	8.35453	8.00477	8.38255	8.35889	8.21864
Glyma.01G186300	Glyma01g39320	Remorin-like protein	G7K6N7_MEDTR	9e-162	AT1G45207.2	9e-60	Remorin family protein	GO:0008150	biological process	GO:0003674	molecular function	GO:0005634 GO:0005886	nucleus; "plasma membrane"	8.69466	8.1229	8.07738	6.36227	4.65101	5.72496	5.26752	5.22984	5.06365
Glyma.01G186600	Glyma01g39350	Lipase	G7K6N4_MEDTR	0	AT5G42930.1	1e-175	alpha/beta-Hydrolases superfamily protein	GO:0006629	lipid metabolic process	GO:0004806	triglyceride lipase activity	GO:0005576	extracellular region	7.51407	6.45765	6.12378	4.91084	NA	NA	NA	NA	NA
Glyma.01G186800	Glyma01g39370	Protein RALF-like 34	RLF34_ARATH	2e-36	AT5G67070.1	2e-39	ralf-like 34	GO:0006949 GO:0007267	cell-cell sig-ling; "syncytium formation"	GO:0004871	sig-l transducer activity	GO:0005576 GO:0048046	apoplast; "extracellular region"	10.2426	7.15144	6.85251	4.5337	1.82944	2.58034	2.23878	2.17225	2.4501
Glyma.01G186900	Glyma01g39380	Rsmv23 protein	G3ECQ9_SOYBN	4e-154	AT4G36950.1	1e-115	mitogen-activated protein kinase kinase kinase 21	GO:0006468	protein phosphorylation	GO:0004672 GO:0004674 GO:0005524 GO:0016772	ATP binding; "protein ki-se activity"; "protein serine/threonine ki-se activity"; "transferase activity, transferring phosphorus-containing groups"	GO:0005886	plasma membrane	3.01756	1.96673	1.41053	-0.52691	-1.35736	0.97597	0.710769	0.655196	0.497073
Glyma.01G187200	Glyma01g39410	MAP-like protein kinase	G7K6M0_MEDTR	0	AT4G36945.1	0	PLC-like phosphodiesterases superfamily protein	GO:0006629 GO:0035556	intracellular sig-l transduction; "lipid metabolic process"	GO:0004629 GO:0008081	phospholipase C activity; "phosphoric diester hydrolase activity"	GO:0005886	plasma membrane	1.40925	0.884272	0.372821	-1.52331	-1.35736	-1.01334	NA	NA	NA
Glyma.01G187300	Glyma01g39420	BRASSINOSTEROID INSENSITIVE 1-associated receptor kinase	G7K6L9_MEDTR	0	AT4G02630.1	0	Protein kinase superfamily protein	GO:0006468 GO:0007623 GO:0042546 GO:0046777	cell wall biogenesis; "circadian rhythm"; "protein autophosphorylation"; "protein phosphorylation"	GO:0004672 GO:0004674 GO:0005524 GO:0016301 GO:0016772	ATP binding; "ki-se activity"; "protein ki-se activity"; "protein serine/threonine ki-se activity"; "transferase activity, transferring phosphorus-containing groups"	GO:0005886	plasma membrane	8.23628	7.22174	7.19753	5.76353	3.28807	3.90822	3.76548	3.59851	3.62597
Glyma.01G187600	Glyma01g39451	Transcription factor SPATULA	G7K6L5_MEDTR	2e-111	AT4G36930.1	8e-51	basic helix-loop-helix (bHLH) DNA-binding superfamily protein	GO:0006355 GO:0007623 GO:0009409 GO:0009908 GO:0010114 GO:0010154 GO:0010187 GO:0048440	carpel development; "circadian rhythm"; "flower development"; "fruit development"; "negative regulation of seed germi-tion"; "regulation of transcription, D--dependent"; "response to cold"; "response to red light"	GO:0003677 GO:0003700 GO:0005515	D- binding; "protein binding"; "sequence-specific D- binding transcription factor activity"	GO:0005634	nucleus	6.75093	5.00022	4.27794	2.97044	0.0476376	0.97597	1.35783	1.33157	1.30282
Glyma.01G187900	Glyma01g39480	PI-PLC X domain-containing protein	G7K5B8_MEDTR	0	AT5G67130.1	0	PLC-like phosphodiesterases superfamily protein	GO:0006629 GO:0035556	intracellular sig-l transduction; "lipid metabolic process"	GO:0004629 GO:0008081	phospholipase C activity; "phosphoric diester hydrolase activity"	GO:0005886 GO:0046658	anchored to plasma membrane; "plasma membrane"	7.57243	5.8055	5.4905	4.2414	2.49022	2.15212	2.92377	3.00853	2.74882
Glyma.01G188200	Glyma01g39510	Transport family protein	B9H6I1_POPTR	0	AT2G23360.1	5e-167	Plant protein of unknown function (DUF869)	GO:0006342 GO:0008150 GO:0051567	biological process; "chromatin silencing"; "histone H3-K9 methylation"	GO:0003674	molecular function	GO:0005737	cytoplasm	5.85577	4.83226	4.87905	3.75499	3.10008	2.68124	2.27685	2.1764	2.69288
Glyma.01G188300	#N/A	-	-	-	-	-	-	-	-	-	-	-	-	2.47691	5.09105	5.38193	3.48947	1.40716	NA	-0.114753	-0.081287	-0.927841
Glyma.01G188400	Glyma01g39520	Integrase-type DNA-binding superfamily protein (Fragment)	S4WXC8_GLYSO	0	AT4G36920.2	2e-136	Integrase-type DNA-binding superfamily protein	GO:0006355 GO:0009888 GO:0009908 GO:0010073 GO:0010093 GO:0019953 GO:0030154 GO:0048316 GO:0048481	cell differentiation; "flower development"; "meristem mainte-nce"; "ovule development"; "regulation of transcription, D--dependent"; "seed development"; "sexual reproduction"; "specification of floral organ identity"; "tissue development"	GO:0003677 GO:0003700	D- binding; "sequence-specific D- binding transcription factor activity"	GO:0005634	nucleus	7.21749	6.95721	6.31912	5.87197	4.24593	3.98777	3.02054	3.19243	2.22413
Glyma.01G188800	Glyma01g39570	Glycosyltransferase GT14K13	E9M5F5_PUEML	0	AT2G36780.1	6e-99	UDP-Glycosyltransferase superfamily protein	GO:0008152	metabolic process	GO:0008194 GO:0016757 GO:0016758	UDP-glycosyltransferase activity; "transferase activity, transferring glycosyl groups"; "transferase activity, transferring hexosyl groups"	GO:0009507	chloroplast	6.52036	3.27065	3.02536	-1.52331	1.34225	1.63411	0.54722	0.563364	0.00225974
Glyma.01G189000	Glyma01g39590	DUF579 protein (Fragment)	F1CYX9_POPTR	3e-158	AT5G67210.1	3e-159	Protein of unknown function (DUF579)	GO:0009834 GO:0010413 GO:0045492	glucuronoxylan metabolic process; "secondary cell wall biogenesis"; "xylan biosynthetic process"	GO:0003674	molecular function	GO:0005794	Golgi apparatus	8.39113	5.71498	5.75754	3.25655	-0.639723	NA	NA	NA	NA
Glyma.01G189500	Glyma01g39650	Phosphatidylinositol-3,4,5-trisphosphate 3-phosphatase and dual-specificity protein phosphatase PTEN	G7K591_MEDTR	0	AT3G19420.1	0	PTEN 2	GO:0006944 GO:0007243 GO:0035335 GO:0043407 GO:0046856 GO:0048193	Golgi vesicle transport; "cellular membrane fusion"; "intracellular protein ki-se cascade"; "negative regulation of MAP ki-se activity"; "peptidyl-tyrosine dephosphorylation"; "phosphatidylinositol dephosphorylation"	GO:0052866 GO:0070300	phosphatidic acid binding; "phosphatidylinositol phosphate phosphatase activity"	GO:0005829	cytosol	7.1235	6.11403	6.18802	4.51033	2.29243	2.28945	2.48761	2.45565	1.93503
Glyma.01G190100	Glyma01g39740	MYB transcription factor MYB112	Q0PJJ1_SOYBN	0	AT4G37260.1	3e-98	myb domain protein 73	GO:0006355 GO:0009723 GO:0009737 GO:0009751 GO:0009753 GO:0010200 GO:0046686	regulation of transcription, D--dependent; "response to abscisic acid stimulus"; "response to cadmium ion"; "response to chitin"; "response to ethylene stimulus"; "response to jasmonic acid stimulus"; "response to salicylic acid stimulus"	GO:0003677 GO:0003700	D- binding; "sequence-specific D- binding transcription factor activity"	GO:0005634	nucleus	11.2613	13.1297	13.3928	12.1445	8.94046	7.67607	8.97022	8.94812	8.88641
Glyma.01G190300	Glyma01g39750	-	-	-	AT4G37300.1	1e-45	maternal effect embryo arrest 59	GO:0009793	embryo development ending in seed dormancy	GO:0003674	molecular function	GO:0005634	nucleus	7.043	7.24608	7.4304	6.43705	3.6248	3.78406	4.037	4.16604	4.03518
Glyma.01G190400	Glyma01g39760	Cytochrome P450	Q9XFX1_CICAR	0	AT4G37330.1	4e-136	cytochrome P450, family 81, subfamily D, polypeptide 4	GO:0055114	oxidation-reduction process	GO:0005506 GO:0009055 GO:0016705 GO:0019825 GO:0020037	electron carrier activity; "heme binding"; "iron ion binding"; "oxidoreductase activity, acting on paired donors, with incorporation or reduction of molecular oxygen"; "oxygen binding"	GO:0005783	endoplasmic reticulum	-1.49729	-1.02355	0.770687	1.74435	2.29243	2.28945	2.69516	2.69728	2.59114
Glyma.01G190500	Glyma01g39770	-	-	-	AT2G15000.1	5e-13	unknown protein; FUNCTIONS IN: molecular_function unknown; INVOLVED IN: biological_process unknown; LOCATED IN: chloroplast; EXPRESSED IN: 22 plant structures; EXPRESSED DURING: 13 growth stages; BEST Arabidopsis thaliana protein match is: unknown protein (TAIR:AT4G34265.2); Has 70 Blast hits to 70 proteins in 9 species: Archae - 0; Bacteria - 0; Metazoa - 0; Fungi - 0; Plants - 70; Viruses - 0; …	GO:0008150 GO:0009220	biological process; "pyrimidine ribonucleotide biosynthetic process"	GO:0003674	molecular function	GO:0005739	mitochondrion	7.48238	6.63358	6.97194	5.47193	4.47611	5.00355	5.08749	5.11628	4.70781
Glyma.01G190600	Glyma01g39780	Indole-3-acetic acid-amido synthetase GH3.3	G7K574_MEDTR	0	AT2G14960.1	0	Auxin-responsive GH3 family protein	GO:0009733 GO:0009741 GO:0010583	response to auxin stimulus; "response to brassinosteroid stimulus"; "response to cyclopentenone"	GO:0003674	molecular function	GO:0005737	cytoplasm	5.95829	3.63992	3.38278	2.23121	0.929377	2.318	2.19913	2.16904	2.48035
Glyma.01G190700	Glyma01g39790	Divalent metal transporter 1	J9PI84_ARAHY	0	AT2G23150.1	0	natural resistance-associated macrophage protein 3	GO:0006810 GO:0006828 GO:0006875 GO:0009617 GO:0010043 GO:0015691 GO:0015692 GO:0030001 GO:0042742 GO:0055072 GO:2000379	cadmium ion transport; "cellular metal ion homeostasis"; "defense response to bacterium"; "iron ion homeostasis"; "lead ion transport"; "manganese ion transport"; "metal ion transport"; "positive regulation of reactive oxygen species metabolic process"; "response to bacterium"; "response to zinc ion"; "transport"	GO:0005215 GO:0005384 GO:0015103 GO:0046873	inorganic anion transmembrane transporter activity; "manganese ion transmembrane transporter activity"; "metal ion transmembrane transporter activity"; "transporter activity"	GO:0005737 GO:0005773 GO:0005774 GO:0005794 GO:0009506 GO:0016020	Golgi apparatus; "cytoplasm"; "membrane"; "plasmodesma"; "vacuolar membrane"; "vacuole"	8.70326	7.15061	6.72177	6.35245	5.08825	5.43692	4.96737	5.0507	4.80689
Glyma.01G190900	Glyma01g39810	Lysine-rich arabinogalactan protein 18	AGP18_ARATH	6e-11	AT4G37450.1	7e-14	arabinogalactan protein _x0001_18	-	-	-	-	GO:0005886 GO:0031225	anchored to membrane; "plasma membrane"	4.83826	2.32642	2.22681	NA	-1.35736	0.574819	0.632741	0.608358	-0.0798389
Glyma.01G191100	Glyma01g39830	Tetratricopeptide repeat protein	G7K3X6_MEDTR	0	AT4G37460.1	0	Tetratricopeptide repeat (TPR)-like superfamily protein	GO:0000278 GO:0006346 GO:0006355 GO:0006396 GO:0009816 GO:0010048 GO:0016246 GO:0031348 GO:0042742 GO:0043687 GO:0045892 GO:0045893	R- interference; "R- processing"; "defense response to bacterium"; "defense response to bacterium, incompatible interaction"; "methylation-dependent chromatin silencing"; "mitotic cell cycle"; "negative regulation of defense response"; "negative regulation of transcription, D--dependent"; "positive regulation of transcription, D--dependent"; "post-translatio-l protein modification"; "regulation o…	GO:0005515 GO:0032947	protein binding; "protein complex scaffold"	GO:0005634 GO:0005737 GO:0043231 GO:0048471	cytoplasm; "intracellular membrane-bounded organelle"; "nucleus"; "perinuclear region of cytoplasm"	8.88664	7.84442	7.7474	6.83085	5.89688	5.96314	5.83253	5.80581	5.68172
Glyma.01G191200	Glyma01g39850	Sigma factor sigB regulation protein rsbQ	G7K3X2_MEDTR	1e-178	AT4G37470.1	4e-160	alpha/beta-Hydrolases superfamily protein	GO:0009640 GO:0009704 GO:0009744 GO:0009813 GO:0010224 GO:0080167	de-etiolation; "flavonoid biosynthetic process"; "photomorphogenesis"; "response to UV-B"; "response to karrikin"; "response to sucrose stimulus"	GO:0016787	hydrolase activity	GO:0005737	cytoplasm	0.0674245	-0.0206707	1.10904	2.90052	4.1075	4.78083	4.78547	4.81485	4.62265
Glyma.01G191500	Glyma01g39880	Chaperone protein dnaJ	G7K3W8_MEDTR	0	AT4G37480.1	0	Chaperone DnaJ-domain superfamily protein	GO:0006457	protein folding	GO:0031072	heat shock protein binding	-	-	4.86945	3.58505	3.509	2.15039	-0.362116	0.998455	2.21798	2.31263	1.00311
Glyma.01G191600	Glyma01g39890	Gb|AAC18972.1	Q9FN15_ARATH	3e-139	AT5G67370.1	3e-142	Protein of unknown function (DUF1230)	GO:0008150	biological process	GO:0003674	molecular function	GO:0009507	chloroplast	5.13907	4.94925	5.01467	4.19306	0.760157	0.574819	0.11726	0.0787796	1.34794
Glyma.01G192500	Glyma01g39990	Peroxidase	G7IU06_MEDTR	0	AT4G37530.1	2e-159	Peroxidase superfamily protein	GO:0006979 GO:0009651 GO:0055114	oxidation-reduction process; "response to oxidative stress"; "response to salt stress"	GO:0004601 GO:0005515 GO:0020037	heme binding; "peroxidase activity"; "protein binding"	GO:0005576	extracellular region	8.82299	4.52842	4.34842	-1.52331	NA	-0.986998	-0.891919	-0.91204	-1.07126
Glyma.01G192700	#N/A	-	-	-	-	-	-	-	-	-	-	-	-	5.5364	7.57201	7.6213	5.8516	2.16411	-1.01334	-1.10717	-1.08887	-0.927841
Glyma.01G192800	Glyma01g40030	-	-	-	-	-	-	-	-	-	-	-	-	6.10484	7.31242	7.76935	5.76642	2.25365	NA	-1.10717	-1.08887	-0.927841
Glyma.01G192900	Glyma01g40041	UPF0553 protein	U553_DICDI	2e-76	-	-	-	-	-	-	-	-	-	4.42394	3.85773	3.98463	2.6462	-0.362116	0.00114721	-1.10717	-1.08887	NA
Glyma.01G193100	Glyma01g40060	Glucan endo-1,3-beta-glucosidase	G7K3T9_MEDTR	6e-177	AT5G67460.1	4e-94	O-Glycosyl hydrolases family 17 protein	GO:0005975	carbohydrate metabolic process	GO:0003824 GO:0004553 GO:0043169	catalytic activity; "cation binding"; "hydrolase activity, hydrolyzing O-glycosyl compounds"	-	-	4.04575	3.1014	2.73801	1.61804	-0.639723	-0.986998	-0.891919	-0.91204	-1.07126
Glyma.01G193200	Glyma01g40080	Formin-like protein	G7K3T6_MEDTR	0	AT5G67470.1	0	formin homolog 6	GO:0016043 GO:0030036	actin cytoskeleton organization; "cellular component organization"	GO:0003779	actin binding	GO:0005618 GO:0005634 GO:0005730 GO:0005737 GO:0005819 GO:0005886 GO:0009524	cell wall; "cytoplasm"; "nucleolus"; "nucleus"; "phragmoplast"; "plasma membrane"; "spindle"	10.284	12.1834	12.419	10.7845	9.06634	8.9313	9.25534	9.15419	8.9205
Glyma.01G193700	Glyma01g40140	VDAC2.1	Q6W2J2_LOTJA	6e-169	AT5G67500.1	8e-145	voltage dependent anion channel 2	GO:0006096 GO:0006820 GO:0009060 GO:0009617 GO:0044070 GO:0046686 GO:0055085	aerobic respiration; "anion transport"; "glycolysis"; "regulation of anion transport"; "response to bacterium"; "response to cadmium ion"; "transmembrane transport"	GO:0008308	voltage-gated anion channel activity	GO:0005618 GO:0005739 GO:0005741 GO:0005774 GO:0009507 GO:0009941 GO:0016020	cell wall; "chloroplast"; "chloroplast envelope"; "membrane"; "mitochondrial outer membrane"; "mitochondrion"; "vacuolar membrane"	7.2664	6.26473	6.15218	5.42072	3.9535	3.55691	3.47996	3.61389	3.76813
Glyma.01G193900	Glyma01g40161	BTB/POZ domain-containing protein	D7LSZ7_ARALL	3e-103	AT3G49900.1	1e-104	Phototropic-responsive NPH3 family protein	GO:0009416	response to light stimulus	GO:0004871	sig-l transducer activity	GO:0005886	plasma membrane	4.64348	3.65889	3.23581	2.71936	0.503705	0.998455	1.00604	1.00061	1.62926
Glyma.01G194000	#N/A	Adenylyl-sulfate kinase	C6TL96_SOYBN	4e-37	AT3G03900.1	8e-25	adenosine-5'-phosphosulfate (APS) kinase 3	GO:0000103 GO:0048232	male gamete generation; "sulfate assimilation"	GO:0004020 GO:0005524 GO:0016301 GO:0016772	ATP binding; "adenylylsulfate ki-se activity"; "ki-se activity"; "transferase activity, transferring phosphorus-containing groups"	GO:0005829 GO:0009507	chloroplast; "cytosol"	4.50703	3.36721	3.3792	1.42834	0.503705	0.00114721	NA	NA	NA
Glyma.01G194500	Glyma01g40210	ADP-RIBOSYLATION FACTOR-like protein	G7K2H2_MEDTR	3e-130	AT3G49870.1	8e-124	ADP-ribosylation factor-like A1C	GO:0006661 GO:0007264 GO:0009741 GO:0051607	defense response to virus; "phosphatidylinositol biosynthetic process"; "response to brassinosteroid stimulus"; "small GTPase mediated sig-l transduction"	GO:0005525	GTP binding	GO:0005576 GO:0005622 GO:0005634 GO:0005737 GO:0005773 GO:0005774 GO:0005794 GO:0005829 GO:0005886 GO:0009506	Golgi apparatus; "cytoplasm"; "cytosol"; "extracellular region"; "intracellular"; "nucleus"; "plasma membrane"; "plasmodesma"; "vacuolar membrane"; "vacuole"	3.6937	2.85974	2.73934	1.45771	-1.35736	-1.01334	-0.114753	-0.081287	NA
Glyma.01G195000	Glyma01g40270	Galactomannan galactosyltransferase	G7K2G3_MEDTR	0	AT2G22900.1	0	Galactosyl transferase GMA12/MNN10 family protein	-	-	GO:0016740 GO:0016757 GO:0016758	transferase activity; "transferase activity, transferring glycosyl groups"; "transferase activity, transferring hexosyl groups"	GO:0005768 GO:0005794 GO:0005802 GO:0016021	Golgi apparatus; "endosome"; "integral to membrane"; "trans-Golgi network"	5.12242	4.77735	5.31198	5.29954	2.18832	2.318	2.45151	2.45616	2.32738
Glyma.01G195700	Glyma01g40360	Phytosulfokine	G7K2F1_MEDTR	3e-23	AT2G22860.1	1e-15	phytosulfokine 2 precursor	GO:0008283 GO:0009887 GO:0030154	cell differentiation; "cell proliferation"; "organ morphogenesis"	GO:0008083	growth factor activity	GO:0005576 GO:0031012	extracellular matrix; "extracellular region"	2.52275	2.90898	2.88407	3.12171	0.376098	-0.986998	-0.891919	-0.91204	-1.07126
Glyma.01G195900	Glyma01g40380	AP2-like ethylene-responsive transcription factor ANT	G7JF92_MEDTR	0	AT4G37750.1	2e-135	Integrase-type DNA-binding superfamily protein	GO:0006306 GO:0006346 GO:0006355 GO:0007276 GO:0009855 GO:0009887 GO:0009944 GO:0009965 GO:0010014 GO:0010051 GO:0010073 GO:0010089 GO:0010492 GO:0016246 GO:0031047 GO:0042127 GO:0044036 GO:0048439 GO:0048519	D- methylation; "R- interference"; "cell wall macromolecule metabolic process"; "determi-tion of bilateral symmetry"; "flower morphogenesis"; "gamete generation"; "gene silencing by R-"; "leaf morphogenesis"; "mainte-nce of shoot apical meristem identity"; "meristem initiation"; "meristem mainte-nce"; "methylation-dependent chromatin silencing"; "negative regulation of biological process"; "organ…	GO:0003677 GO:0003700	D- binding; "sequence-specific D- binding transcription factor activity"	GO:0005634	nucleus	2.79531	1.86422	2.75349	-0.52691	0.376098	NA	NA	NA	NA
Glyma.01G196500	Glyma01g40440	-	-	-	-	-	-	-	-	-	-	-	-	-0.469402	-1.00977	0.629368	1.57341	1.67486	2.02495	1.79161	1.80166	0.951408
Glyma.01G196600	Glyma01g40450	HD domain class transcription factor	D9ZJ03_MALDO	3e-127	AT4G37790.1	9e-96	Homeobox-leucine zipper protein family	GO:0006355 GO:0006473 GO:0009735	protein acetylation; "regulation of transcription, D--dependent"; "response to cytokinin stimulus"	GO:0003677 GO:0003700 GO:0043565	D- binding; "sequence-specific D- binding"; "sequence-specific D- binding transcription factor activity"	GO:0005634	nucleus	6.71829	4.95236	4.92428	3.39909	1.96727	3.49807	4.0629	3.96812	3.73567
Glyma.01G197000	#N/A	-	-	-	-	-	-	-	-	-	-	-	-	1.17505	2.30411	2.25623	3.73863	5.77985	6.91077	6.31245	6.38534	6.12245
Glyma.01G197200	#N/A	-	-	-	-	-	-	-	-	-	-	-	-	3.17631	5.46493	5.51206	6.35555	6.5233	7.17535	6.87454	6.9789	6.71822
Glyma.01G197400	Glyma01g40540	-	-	-	-	-	-	-	-	-	-	-	-	6.40459	3.03511	3.09373	-0.47091	NA	NA	NA	NA	NA
Glyma.01G197500	Glyma01g40550	Tubulin alpha-5 chain	G7JFB0_MEDTR	0	AT1G50010.1	0	tubulin alpha-2 chain	GO:0006184 GO:0007017 GO:0007018 GO:0009651 GO:0051258	GTP catabolic process; "microtubule-based movement"; "microtubule-based process"; "protein polymerization"; "response to salt stress"	GO:0003924 GO:0005198 GO:0005200 GO:0005525	GTP binding; "GTPase activity"; "structural constituent of cytoskeleton"; "structural molecule activity"	GO:0005618 GO:0005737 GO:0005829 GO:0005874 GO:0016020 GO:0043234 GO:0045298	cell wall; "cytoplasm"; "cytosol"; "membrane"; "microtubule"; "protein complex"; "tubulin complex"	5.88972	3.89424	3.51912	1.42834	-0.362116	0.00114721	NA	NA	NA
Glyma.01G197600	Glyma01g40560	Receptor protein kinase-like protein	G7K141_MEDTR	0	AT5G65710.1	0	HAESA-like 2	GO:0006468 GO:0007169 GO:0010102 GO:0010468	lateral root morphogenesis; "protein phosphorylation"; "regulation of gene expression"; "transmembrane receptor protein tyrosine ki-se sig-ling pathway"	GO:0004672 GO:0004674 GO:0005524 GO:0016301 GO:0016772	ATP binding; "ki-se activity"; "protein ki-se activity"; "protein serine/threonine ki-se activity"; "transferase activity, transferring phosphorus-containing groups"	GO:0005886	plasma membrane	7.14617	5.49376	5.38804	3.88341	2.86375	3.3863	2.15869	2.16598	1.25805
Glyma.01G197800	Glyma01g40590	Receptor-like protein kinase 3	Q9LKZ4_SOYBN	0	AT5G65700.2	0	Leucine-rich receptor-like protein kinase family protein	GO:0000271 GO:0006468 GO:0007020 GO:0007169 GO:0009825 GO:0009932 GO:0009934 GO:0010075 GO:0010480 GO:0010817 GO:0043481 GO:0048229 GO:0048437 GO:0048653 GO:0048767 GO:0071555	anther development; "anthocyanin accumulation in tissues in response to UV light"; "cell tip growth"; "cell wall organization"; "floral organ development"; "gametophyte development"; "microsporocyte differentiation"; "microtubule nucleation"; "multidimensio-l cell growth"; "polysaccharide biosynthetic process"; "protein phosphorylation"; "regulation of hormone levels"; "regulation of meristem gro…	GO:0004672 GO:0004674 GO:0005515 GO:0005524 GO:0016301 GO:0016772 GO:0033612 GO:0043621	ATP binding; "ki-se activity"; "protein binding"; "protein ki-se activity"; "protein self-association"; "protein serine/threonine ki-se activity"; "receptor serine/threonine ki-se binding"; "transferase activity, transferring phosphorus-containing groups"	GO:0005886	plasma membrane	10.1356	8.6536	8.56401	6.97276	5.10487	5.33363	4.97007	5.22152	4.88444
Glyma.01G197900	Glyma01g40600	BHLH transcription factor	G7K134_MEDTR	5e-99	AT4G37850.1	2e-54	basic helix-loop-helix (bHLH) DNA-binding superfamily protein	GO:0006355	regulation of transcription, D--dependent	GO:0003677 GO:0003700	D- binding; "sequence-specific D- binding transcription factor activity"	GO:0005634	nucleus	5.04165	2.99866	2.95869	0.0555561	NA	NA	NA	NA	NA
Glyma.01G198100	Glyma01g40620	BHLH transcription factor	G7K125_MEDTR	7e-96	AT4G37850.1	3e-55	basic helix-loop-helix (bHLH) DNA-binding superfamily protein	GO:0006355	regulation of transcription, D--dependent	GO:0003677 GO:0003700	D- binding; "sequence-specific D- binding transcription factor activity"	GO:0005634	nucleus	5.90065	2.79511	2.68956	NA	NA	NA	-1.10717	-1.08887	NA
Glyma.01G198300	#N/A	-	-	-	-	-	-	-	-	-	-	-	-	2.20514	2.12364	2.18035	1.9699	0.212256	1.02081	-0.891919	-0.91204	-1.07126
Glyma.01G198400	Glyma01g40640	-	-	-	-	-	-	-	-	-	-	-	-	2.26665	1.60759	1.58356	-0.52691	NA	NA	NA	NA	-0.927841
Glyma.01G198600	Glyma01g40661	N-acetylornithine deacetylase-like protein	G7JZY6_MEDTR	3e-158	AT4G17830.1	4e-145	Peptidase M20/M25/M40 family protein	GO:0006508 GO:0008152	metabolic process; "proteolysis"	GO:0008237 GO:0016787	hydrolase activity; "metallopeptidase activity"	GO:0005829	cytosol	6.6436	9.06282	9.00364	8.89128	9.71904	10.5013	10.4458	10.4095	10.1953
Glyma.01G199200	Glyma01g40720	LSD-One-Like 1	Q53UG6_BRACM	1e-74	AT1G32540.3	1e-77	lsd one like 1	GO:0009814 GO:0034052 GO:0043068 GO:2000121	defense response, incompatible interaction; "positive regulation of plant-type hypersensitive response"; "positive regulation of programmed cell death"; "regulation of removal of superoxide radicals"	GO:0003677	D- binding	GO:0005576	extracellular region	5.99965	3.76128	3.96424	1.45771	1.67486	2.02495	2.49272	2.5843	1.83039
Glyma.01G199600	Glyma01g40780	Protein phosphatase 2C	G7JGI0_MEDTR	0	AT2G35350.1	0	poltergeist like 1	GO:0006355 GO:0006499 GO:0009826 GO:0009933 GO:0010074 GO:0018345 GO:0018377	N-termi-l protein myristoylation; "mainte-nce of meristem identity"; "meristem structural organization"; "protein myristoylation"; "protein palmitoylation"; "regulation of transcription, D--dependent"; "unidimensio-l cell growth"	GO:0003824 GO:0004722 GO:0005543	catalytic activity; "phospholipid binding"; "protein serine/threonine phosphatase activity"	GO:0005634 GO:0005886	nucleus; "plasma membrane"	8.32377	6.17512	5.86356	4.06117	2.99252	3.44701	2.56112	2.58265	2.48035
Glyma.01G199700	Glyma01g40810	Glycine cleavage system H protein, mitochondrial	GCSH_FLAAN	8e-98	AT2G35370.1	2e-92	glycine decarboxylase complex H	GO:0006098 GO:0006364 GO:0006546 GO:0009409 GO:0009657 GO:0009697 GO:0009744 GO:0009749 GO:0009814 GO:0009853 GO:0010207 GO:0015979 GO:0019344 GO:0019464 GO:0019684 GO:0042742 GO:0043085	cysteine biosynthetic process; "defense response, incompatible interaction"; "defense response to bacterium"; "glycine catabolic process"; "glycine decarboxylation via glycine cleavage system"; "pentose-phosphate shunt"; "photorespiration"; "photosynthesis"; "photosynthesis, light reaction"; "photosystem II assembly"; "plastid organization"; "positive regulation of catalytic activity"; "rR- proce…	GO:0004375	glycine dehydroge-se (decarboxylating) activity	GO:0005634 GO:0005739 GO:0005960 GO:0009507 GO:0009579	chloroplast; "glycine cleavage complex"; "mitochondrion"; "nucleus"; "thylakoid"	3.69004	2.73636	2.01067	1.65927	-0.362116	0.00114721	-0.114753	-0.081287	NA
Glyma.01G199900	Glyma01g40830	EG5651	U3GP17_MANES	8e-13	AT1G32460.1	5e-07	unknown protein; Has 19 Blast hits to 19 proteins in 8 species: Archae - 0; Bacteria - 0; Metazoa - 0; Fungi - 0; Plants - 19; Viruses - 0; Other Eukaryotes - 0 (source: NCBI BLink).	GO:0008150 GO:0010200	biological process; "response to chitin"	GO:0003674	molecular function	GO:0005634	nucleus	6.49908	6.14217	5.86426	5.24736	3.984	3.08202	3.77986	3.8134	3.92038
Glyma.01G200000	Glyma01g40840	-	-	-	AT5G64816.2	6e-74	unknown protein; Has 35333 Blast hits to 34131 proteins in 2444 species: Archae - 798; Bacteria - 22429; Metazoa - 974; Fungi - 991; Plants - 531; Viruses - 0; Other Eukaryotes - 9610 (source: NCBI BLink).	GO:0008150	biological process	GO:0003674	molecular function	GO:0005575	cellular component	8.61271	7.30521	7.02364	6.66007	5.69886	5.90207	5.64682	5.77851	5.60605
Glyma.01G200100	Glyma01g40850	Peptide transporter PTR1	G7JZV7_MEDTR	0	AT1G32450.1	0	nitrate transporter 1.5	GO:0006598 GO:0006826 GO:0006857 GO:0009698 GO:0009734 GO:0010106 GO:0010167 GO:0015698 GO:0015706 GO:0042398	auxin mediated sig-ling pathway; "cellular modified amino acid biosynthetic process"; "cellular response to iron ion starvation"; "inorganic anion transport"; "iron ion transport"; "nitrate transport"; "oligopeptide transport"; "phenylpropanoid metabolic process"; "polyamine catabolic process"; "response to nitrate"	GO:0005215 GO:0015112	nitrate transmembrane transporter activity; "transporter activity"	GO:0005886 GO:0016020	membrane; "plasma membrane"	10.2908	5.64055	5.57799	0.5	NA	-0.986998	0.54722	0.563364	1.90152
Glyma.01G200200	Glyma01g40860	Pyruvate kinase	K7K4U4_SOYBN	0	AT1G32440.1	0	plastidial pyruvate kinase 3	GO:0006096 GO:0006633	fatty acid biosynthetic process; "glycolysis"	GO:0000287 GO:0003824 GO:0004743 GO:0030955	catalytic activity; "magnesium ion binding"; "potassium ion binding"; "pyruvate ki-se activity"	GO:0009507 GO:0009570	chloroplast; "chloroplast stroma"	4.29019	4.00037	3.38747	2.83457	-0.639723	0.565058	1.07372	1.02918	1.30282
Glyma.01G200500	Glyma01g40880	Inositol-1,4,5-triphosphate-5-phosphatase	A8IDV8_SOLLC	0	AT4G18010.2	0	myo-inositol polyphosphate 5-phosphatase 2	GO:0007165 GO:0009414 GO:0009611 GO:0009723 GO:0009733 GO:0009737 GO:0009738 GO:0009753 GO:0009845 GO:0032957 GO:0042538 GO:0046854 GO:0046855 GO:0052542	abscisic acid mediated sig-ling pathway; "defense response by callose deposition"; "hyperosmotic salinity response"; "inositol phosphate dephosphorylation"; "inositol trisphosphate metabolic process"; "phosphatidylinositol phosphorylation"; "response to abscisic acid stimulus"; "response to auxin stimulus"; "response to ethylene stimulus"; "response to jasmonic acid stimulus"; "response to water …	GO:0004445	inositol-polyphosphate 5-phosphatase activity	GO:0005737	cytoplasm	8.28554	9.04673	8.81289	8.93599	4.5469	4.69033	5.61858	5.40206	5.62346
Glyma.01G200800	Glyma01g40900	Two-component response regulator-like protein	G7JZU4_MEDTR	0	AT4G18020.6	2e-138	CheY-like two-component responsive regulator family protein	GO:0000160 GO:0006355 GO:0007623 GO:0009736	circadian rhythm; "cytokinin mediated sig-ling pathway"; "phosphorelay sig-l transduction system"; "regulation of transcription, D--dependent"	GO:0000156 GO:0003700 GO:0005515	phosphorelay response regulator activity; "protein binding"; "sequence-specific D- binding transcription factor activity"	GO:0005634	nucleus	9.66995	6.62098	6.76576	3.6168	0.0476376	-0.000621929	0.54722	0.563364	-1.07126
Glyma.01G201500	Glyma01g40960	NADH-plastoquinone oxidoreductase subunit 2 (Fragment)	G0YCZ9_EUCLU	3e-29	ATCG01250.1	2e-29	NADH-Ubiquinone/plastoquinone (complex I) protein	GO:0042773 GO:0055114	ATP synthesis coupled electron transport; "oxidation-reduction process"	GO:0008137	-DH dehydroge-se (ubiquinone) activity	GO:0009507	chloroplast	NA	NA	NA	1.14228	-1.35736	-1.01334	NA	NA	NA
Glyma.01G201600	Glyma01g40985	Photosystem I assembly protein Ycf3	G8A326_MEDTR	3e-71	ATCG00360.1	6e-70	Tetratricopeptide repeat (TPR)-like superfamily protein	GO:0006091 GO:0006354 GO:0015979 GO:0048564	D--dependent transcription, elongation; "generation of precursor metabolites and energy"; "photosynthesis"; "photosystem I assembly"	GO:0051082	unfolded protein binding	GO:0009507	chloroplast	2.654	4.21154	2.61397	5.42271	4.58354	5.52789	3.6943	3.69813	3.10458
Glyma.01G202200	Glyma01g41070	BON association protein 1	B9IC91_POPTR	3e-47	AT2G45760.1	5e-35	BON association protein 2	GO:0008150 GO:0009627 GO:0009693 GO:0009697	biological process; "ethylene biosynthetic process"; "salicylic acid biosynthetic process"; "systemic acquired resistance"	GO:0003674	molecular function	GO:0005575	cellular component	7.48289	5.57152	5.26084	4.26848	2.06797	1.35684	0.0047454	0.00190919	0.618643
Glyma.01G202700	Glyma01g41120	Histone-lysine N-methyltransferase, H3 lysine-9 specific SUVH6	G7JYL0_MEDTR	1e-115	AT2G22740.1	1e-71	SU(VAR)3-9 homolog 6	GO:0016571 GO:0034968	histone lysine methylation; "histone methylation"	GO:0008168 GO:0008270 GO:0008327 GO:0010428 GO:0010429 GO:0018024 GO:0042393	histone-lysine N-methyltransferase activity; "histone binding"; "methyl-CpG binding"; "methyl-CpNpG binding"; "methyl-CpNpN binding"; "methyltransferase activity"; "zinc ion binding"	GO:0005634	nucleus	8.74383	5.64849	5.43558	2.61428	4.8731	5.99628	5.15077	5.00844	5.20353
Glyma.01G202800	Glyma01g41126	Cysteine-rich receptor-like protein kinase	G7IDW1_MEDTR	1e-10	AT4G38180.1	4e-10	FAR1-related sequence 5	GO:0009639	response to red or far red light	GO:0008270	zinc ion binding	GO:0005634	nucleus	4.64348	3.65889	3.60722	3.0328	1.4615	0.998455	1.53995	1.57063	1.00311
Glyma.01G202900	Glyma01g41133	OSJNBa0041M21.10 protein	Q7X8F3_ORYSJ	2e-35	AT4G38180.1	3e-25	FAR1-related sequence 5	GO:0009639	response to red or far red light	GO:0008270	zinc ion binding	GO:0005634	nucleus	4.22894	4.45135	4.62469	4.07693	2.49099	2.08539	2.8909	2.91306	0.675164
Glyma.01G203000	Glyma01g41140	Glycine-rich protein	D7MQL9_ARALL	0	AT5G47020.1	0	unknown protein; FUNCTIONS IN: molecular_function unknown; INVOLVED IN: biological_process unknown; LOCATED IN: endomembrane system; EXPRESSED IN: 23 plant structures; EXPRESSED DURING: 13 growth stages; BEST Arabidopsis thaliana protein match is: unknown protein (TAIR:AT5G11700.2); Has 1807 Blast hits to 1807 proteins in 277 species: Archae - 0; Bacteria - 0; Metazoa - 736; Fungi - 347; Plants -…	GO:0008150	biological process	GO:0003674	molecular function	GO:0005576	extracellular region	9.29186	7.26967	7.07965	5.52575	3.66096	3.84842	3.6943	3.69813	3.10458
Glyma.01G203400	Glyma01g41190	Beta-amylase	Q5F305_SOYBN	0	AT4G17090.1	0	chloroplast beta-amylase	GO:0000024 GO:0000272 GO:0005975 GO:0005983 GO:0009409	carbohydrate metabolic process; "maltose biosynthetic process"; "polysaccharide catabolic process"; "response to cold"; "starch catabolic process"	GO:0003824 GO:0016161 GO:0043169	beta-amylase activity; "catalytic activity"; "cation binding"	GO:0009507 GO:0009570	chloroplast; "chloroplast stroma"	4.89216	4.21735	4.04366	4.12389	1.82944	1.87049	1.23988	1.29073	1.39164
Glyma.01G203600	Glyma01g41210	60S ribosomal protein L37a	A9PAM1_POPTR	1e-57	AT3G10950.1	5e-57	Zinc-binding ribosomal protein family protein	GO:0006412 GO:0042254	ribosome biogenesis; "translation"	GO:0003735	structural constituent of ribosome	GO:0005622 GO:0005737 GO:0005829 GO:0005840 GO:0022625	cytoplasm; "cytosol"; "cytosolic large ribosomal subunit"; "intracellular"; "ribosome"	9.51722	8.43263	8.19755	7.33593	5.25923	5.34384	6.06119	6.17311	5.9619
Glyma.01G204400	Glyma01g41290	Protein TIFY	G7JYL9_MEDTR	2e-45	AT1G74950.1	4e-23	TIFY domain/Divergent CCT motif family protein	GO:0006612 GO:0007165 GO:0009414 GO:0009611 GO:0009620 GO:0009695 GO:0009723 GO:0009733 GO:0009738 GO:0009753 GO:0009863 GO:0009867 GO:0010363 GO:0042538 GO:0043069	abscisic acid mediated sig-ling pathway; "hyperosmotic salinity response"; "jasmonic acid biosynthetic process"; "jasmonic acid mediated sig-ling pathway"; "negative regulation of programmed cell death"; "protein targeting to membrane"; "regulation of plant-type hypersensitive response"; "response to auxin stimulus"; "response to ethylene stimulus"; "response to fungus"; "response to jasmonic aci…	GO:0005515	protein binding	GO:0005634	nucleus	8.81046	6.62849	6.86345	4.57146	1.24486	-0.000621929	0.54722	0.563364	-1.07126
Glyma.01G204500	Glyma01g41301	DNA repair endonuclease UVH1	G7JYL5_MEDTR	2e-125	AT5G41150.2	1e-108	Restriction endonuclease, type II-like superfamily protein	GO:0000710 GO:0000712 GO:0000724 GO:0006259 GO:0006281 GO:0006289 GO:0006296 GO:0006979 GO:0009314	D- metabolic process; "D- repair"; "double-strand break repair via homologous recombi-tion"; "meiotic mismatch repair"; "nucleotide-excision repair"; "nucleotide-excision repair, D- incision, 5'-to lesion"; "resolution of meiotic recombi-tion intermediates"; "response to oxidative stress"; "response to radiation"	GO:0000014 GO:0003677 GO:0003697 GO:0004518	D- binding; "nuclease activity"; "single-stranded D- binding"; "single-stranded D- specific endodeoxyribonuclease activity"	GO:0000110 GO:0005634	nucleotide-excision repair factor 1 complex; "nucleus"	5.35269	6.2067	5.82152	6.28399	7.985	8.88051	9.08549	9.04887	8.62349
Glyma.01G204600	Glyma01g41310	Glutamate dehydrogenase	I1J9Q7_SOYBN	0	AT5G07440.2	0	glutamate dehydrogenase 2	GO:0006520 GO:0006598 GO:0006944 GO:0009651 GO:0009698 GO:0042398 GO:0046482 GO:0046686 GO:0048193 GO:0055114	Golgi vesicle transport; "cellular amino acid metabolic process"; "cellular membrane fusion"; "cellular modified amino acid biosynthetic process"; "oxidation-reduction process"; "para-aminobenzoic acid metabolic process"; "phenylpropanoid metabolic process"; "polyamine catabolic process"; "response to cadmium ion"; "response to salt stress"	GO:0000166 GO:0004352 GO:0004353 GO:0005507 GO:0005524 GO:0008270 GO:0016491 GO:0016639 GO:0050897	ATP binding; "cobalt ion binding"; "copper ion binding"; "glutamate dehydroge-se (-D+) activity"; "glutamate dehydroge-se [-D(P)+] activity"; "nucleotide binding"; "oxidoreductase activity"; "oxidoreductase activity, acting on the CH-NH2 group of donors, -D or -DP as acceptor"; "zinc ion binding"	GO:0005737 GO:0005739 GO:0005774	cytoplasm; "mitochondrion"; "vacuolar membrane"	8.7912	4.46227	4.38173	0.539935	-1.35736	0.574819	0.632741	0.608358	-0.0798389
Glyma.01G204700	Glyma01g41320	Lil3 family protein	B9N2V9_POPTR	1e-94	AT4G17600.1	3e-84	Chlorophyll A-B binding family protein	GO:0006098 GO:0006355 GO:0006364 GO:0006417 GO:0009637 GO:0009657 GO:0009902 GO:0009965 GO:0010027 GO:0010103 GO:0010114 GO:0010207 GO:0010218 GO:0015979 GO:0015995 GO:0019288 GO:0030154 GO:0034660 GO:0045893	cell differentiation; "chlorophyll biosynthetic process"; "chloroplast relocation"; "isopentenyl diphosphate biosynthetic process, mevalo-te-independent pathway"; "leaf morphogenesis"; "ncR- metabolic process"; "pentose-phosphate shunt"; "photosynthesis"; "photosystem II assembly"; "plastid organization"; "positive regulation of transcription, D--dependent"; "rR- processing"; "regulation of trans…	GO:0003700	sequence-specific D- binding transcription factor activity	GO:0009507 GO:0009535	chloroplast; "chloroplast thylakoid membrane"	3.44464	1.72005	1.61875	NA	-1.35736	-1.01334	NA	NA	NA
Glyma.01G205100	Glyma01g41370	Zinc finger family protein	B9N2W6_POPTR	0	AT4G17570.3	9e-155	GATA transcription factor 26	GO:0006355	regulation of transcription, D--dependent	GO:0003700 GO:0008270 GO:0043565	sequence-specific D- binding; "sequence-specific D- binding transcription factor activity"; "zinc ion binding"	GO:0005634	nucleus	7.10282	5.40225	5.49015	3.88731	2.74278	3.03981	3.21171	3.15646	2.84811
Glyma.01G205900	Glyma01g41450	Lipase	G7JXH0_MEDTR	0	AT4G16820.1	0	alpha/beta-Hydrolases superfamily protein	GO:0006629 GO:0009693	ethylene biosynthetic process; "lipid metabolic process"	GO:0004806 GO:0008970 GO:0047714	galactolipase activity; "phosphatidylcholine 1-acylhydrolase activity"; "triglyceride lipase activity"	GO:0009507	chloroplast	9.58508	7.57551	7.6278	5.65509	2.29243	1.35684	1.69798	1.78007	1.39164
Glyma.01G206600	Glyma01g41520	Ethylene response factor 11	G8EVZ8_MEDSA	1e-110	AT4G17500.1	2e-80	ethylene responsive element binding factor 1	GO:0002679 GO:0006355 GO:0009414 GO:0009723 GO:0009737 GO:0009738 GO:0009873 GO:0010200 GO:0035556 GO:0042538 GO:0045893	abscisic acid mediated sig-ling pathway; "ethylene mediated sig-ling pathway"; "hyperosmotic salinity response"; "intracellular sig-l transduction"; "positive regulation of transcription, D--dependent"; "regulation of transcription, D--dependent"; "respiratory burst involved in defense response"; "response to abscisic acid stimulus"; "response to chitin"; "response to ethylene stimulus"; "respons…	GO:0003677 GO:0003700	D- binding; "sequence-specific D- binding transcription factor activity"	GO:0005634 GO:0005643	nuclear pore; "nucleus"	9.2476	5.40411	5.27546	1.24361	-0.639723	NA	NA	NA	-0.927841
Glyma.01G206800	Glyma01g41534	Nudix hydrolase	G7JHP2_MEDTR	3e-94	AT5G47240.1	2e-82	nudix hydrolase homolog 8	GO:0009611	response to wounding	GO:0016787	hydrolase activity	GO:0005829	cytosol	4.3762	8.0197	7.53381	6.83042	5.06956	4.6458	5.08619	5.15093	4.79333
Glyma.01G206900	Glyma01g41542	Nudix hydrolase	G7JHP2_MEDTR	3e-29	AT5G47240.1	8e-28	nudix hydrolase homolog 8	GO:0009611	response to wounding	GO:0016787	hydrolase activity	GO:0005829	cytosol	7.27875	9.77835	9.37587	9.09544	7.15598	6.80348	6.58967	6.9663	6.47589
Glyma.01G207000	Glyma01g41550	EREBP-4 like protein	G7JHP3_MEDTR	1e-99	AT5G47310.1	6e-101	PPPDE putative thiol peptidase family protein	GO:0008150	biological process	GO:0003674	molecular function	GO:0005737	cytoplasm	7.05211	4.74943	4.72982	2.19248	2.18832	2.55181	2.52312	2.4553	2.09318
Glyma.01G207300	Glyma01g41581	Homeobox-leucine zipper protein	Q39862_SOYBN	0	AT5G47370.1	6e-103	Homeobox-leucine zipper protein 4 (HB-4) / HD-ZIP protein	GO:0006351 GO:0006355 GO:0009641 GO:0009733 GO:0009734 GO:0009826 GO:0045892	auxin mediated sig-ling pathway; "negative regulation of transcription, D--dependent"; "regulation of transcription, D--dependent"; "response to auxin stimulus"; "shade avoidance"; "transcription, D--dependent"; "unidimensio-l cell growth"	GO:0003677 GO:0003700 GO:0043565	D- binding; "sequence-specific D- binding"; "sequence-specific D- binding transcription factor activity"	GO:0005634	nucleus	8.92636	9.77951	9.61246	10.1217	8.34859	7.39521	7.33875	7.94343	7.44993
Glyma.01G208300	Glyma01g41680	-	-	-	AT5G47380.1	0	Protein of unknown function, DUF547	GO:0008150	biological process	GO:0003674	molecular function	GO:0005634	nucleus	3.24602	2.55902	1.52153	0.774788	0.617159	1.60921	0.632741	0.608358	-0.0798389
Glyma.01G208500	Glyma01g41700	2-succinylbenzoate-CoA ligase	G7K5Y8_MEDTR	1e-17	AT1G21530.1	6e-17	AMP-dependent synthetase and ligase family protein	GO:0008152	metabolic process	GO:0003824	catalytic activity	GO:0005739	mitochondrion	2.78592	1.62349	1.28144	1.36262	NA	-0.986998	0.54722	0.563364	0.00225974
Glyma.01G208700	Glyma01g41740	DUF246 domain-containing protein	G7JIV4_MEDTR	0	AT4G16650.1	0	O-fucosyltransferase family protein	GO:0008150	biological process	GO:0016757	transferase activity, transferring glycosyl groups	GO:0005768 GO:0005794 GO:0005802	Golgi apparatus; "endosome"; "trans-Golgi network"	8.93213	5.93885	5.9222	3.09484	1.67486	1.84561	1.29906	1.31204	0.55635
Glyma.01G208800	Glyma01g41750	Matrix metalloproteinase-28	G7JW40_MEDTR	0	AT4G16640.1	3e-120	Matrixin family protein	GO:0006508 GO:0008152	metabolic process; "proteolysis"	GO:0004222 GO:0008237 GO:0008270	metalloendopeptidase activity; "metallopeptidase activity"; "zinc ion binding"	GO:0005576 GO:0031012 GO:0031225	anchored to membrane; "extracellular matrix"; "extracellular region"	5.71645	5.3662	5.32532	4.4447	1.96727	2.49798	2.62912	2.70213	0.90452
Glyma.01G208900	Glyma01g41760	Pentatricopeptide repeat-containing protein	D7MP46_ARALL	3e-160	AT5G47460.1	1e-164	Pentatricopeptide repeat (PPR) superfamily protein	GO:0008150	biological process	GO:0003674	molecular function	GO:0005739	mitochondrion	4.30108	4.99605	4.51501	4.6705	2.97334	2.15212	2.19913	2.16904	2.32738
Glyma.01G209500	Glyma01g41820	Pectinesterase	I1LGQ0_SOYBN	0	AT5G47500.1	0	Pectin lyase-like superfamily protein	GO:0016572 GO:0042545	cell wall modification; "histone phosphorylation"	GO:0030599	pectinesterase activity	GO:0005576 GO:0005618 GO:0009505	cell wall; "extracellular region"; "plant-type cell wall"	6.2197	4.24038	3.45435	1.86529	0.929377	1.63411	1.48808	1.55496	0.618643
Glyma.01G209600	Glyma01g41830	(RAP Annotation release2) Glycosyl transferase	G7JW31_MEDTR	0	AT4G16600.1	8e-162	Nucleotide-diphospho-sugar transferases superfamily protein	GO:0009058 GO:0016051	biosynthetic process; "carbohydrate biosynthetic process"	GO:0016757 GO:0016758	transferase activity, transferring glycosyl groups; "transferase activity, transferring hexosyl groups"	-	-	5.71745	2.71177	2.6074	NA	NA	NA	NA	NA	NA
Glyma.01G209900	Glyma01g41880	Sec14 cytosolic factor	G7JW23_MEDTR	0	AT5G47510.1	3e-137	Sec14p-like phosphatidylinositol transfer family protein	GO:0006810	transport	GO:0005215	transporter activity	GO:0005886	plasma membrane	2.51654	1.49131	1.71705	0.856474	-1.35736	-1.01334	-0.114753	-0.081287	-0.927841
Glyma.01G210000	Glyma01g41890	-	-	-	-	-	-	-	-	-	-	-	-	2.79531	1.86422	2.05916	-0.52691	-1.35736	-1.01334	NA	NA	NA
Glyma.01G210100	Glyma01g41901	Vesicle-associated membrane protein	G7JW19_MEDTR	1e-141	AT2G45140.1	1e-103	plant VAP homolog 12	GO:0006605 GO:0030968 GO:0046482 GO:0046777	endoplasmic reticulum unfolded protein response; "para-aminobenzoic acid metabolic process"; "protein autophosphorylation"; "protein targeting"	GO:0005198 GO:0005515	protein binding; "structural molecule activity"	GO:0005634 GO:0005783 GO:0005829 GO:0005886	cytosol; "endoplasmic reticulum"; "nucleus"; "plasma membrane"	6.85024	4.8057	4.98213	3.73424	1.93451	3.00852	3.7649	3.67259	3.45521
Glyma.01G210600	Glyma01g41940	Oxysterol-binding family protein	U5GRI5_POPTR	0	AT4G22540.1	0	OSBP(oxysterol binding protein)-related protein 2A	GO:0007165 GO:0008202	sig-l transduction; "steroid metabolic process"	GO:0005543 GO:0008142 GO:0035091	oxysterol binding; "phosphatidylinositol binding"; "phospholipid binding"	GO:0005634	nucleus	6.53212	6.40171	6.06613	5.62066	3.6248	3.96615	3.85248	3.71426	3.69211
Glyma.01G210700	Glyma01g41960	-	-	-	AT1G62520.1	6e-92	unknown protein; BEST Arabidopsis thaliana protein match is: unknown protein (TAIR:AT4G12450.1); Has 388 Blast hits to 388 proteins in 26 species: Archae - 0; Bacteria - 1; Metazoa - 0; Fungi - 8; Plants - 376; Viruses - 0; Other Eukaryotes - 3 (source: NCBI BLink).	GO:0008150	biological process	GO:0003674	molecular function	GO:0005634	nucleus	1.44489	2.18698	2.09995	2.95851	3.40751	3.92881	4.39083	4.3357	4.4071
Glyma.01G210800	Glyma01g41970	Adenine phosphoribosyltransferase-like protein	G7JW03_MEDTR	4e-108	AT4G22570.1	1e-98	adenine phosphoribosyl transferase 3	GO:0006168 GO:0009116	adenine salvage; "nucleoside metabolic process"	GO:0003999	adenine phosphoribosyltransferase activity	GO:0005737 GO:0005829	cytoplasm; "cytosol"	3.19014	3.00107	2.1479	1.59056	NA	NA	-0.114753	-0.081287	NA
Glyma.01G210900	#N/A	-	-	-	-	-	-	-	-	-	-	-	-	-1.49729	-1.02355	NA	-1.52331	NA	0.565058	0.710769	0.655196	0.497073
Glyma.01G211200	Glyma01g42010	Stress-induced-phosphoprotein	G7KG90_MEDTR	0	AT4G12400.2	0	stress-inducible protein, putative	GO:0006457 GO:0009408 GO:0009644 GO:0010286 GO:0034976 GO:0042542	heat acclimation; "protein folding"; "response to endoplasmic reticulum stress"; "response to heat"; "response to high light intensity"; "response to hydrogen peroxide"	-	-	-	-	11.328	12.7623	12.7461	12.8992	12.9096	13.8501	14.6117	14.5141	14.4008
Glyma.01G211500	Glyma01g42050	Transcription factor MYBJ1	C6TM99_SOYBN	4e-135	AT4G12350.1	1e-98	myb domain protein 42	GO:0006355 GO:2000652	regulation of secondary cell wall biogenesis; "regulation of transcription, D--dependent"	GO:0003677 GO:0003700	D- binding; "sequence-specific D- binding transcription factor activity"	GO:0005634	nucleus	4.73461	2.28208	2.38617	NA	-1.35736	-1.01334	-1.10717	-1.08887	NA
Glyma.01G212400	Glyma01g42160	F16P17.2 protein	Q9LQ19_ARATH	0	AT1G62870.1	0	unknown protein; BEST Arabidopsis thaliana protein match is: unknown protein (TAIR:AT1G12380.1); Has 351 Blast hits to 343 proteins in 42 species: Archae - 2; Bacteria - 0; Metazoa - 27; Fungi - 5; Plants - 299; Viruses - 0; Other Eukaryotes - 18 (source: NCBI BLink).	-	-	-	-	GO:0009507	chloroplast	5.92298	4.30173	4.45842	2.90418	2.73748	2.9435	2.48761	2.45565	2.29578
Glyma.01G212500	Glyma01g42170	Pentatricopeptide (PPR) repeat-containing protein-like	Q6ETC2_ORYSJ	2e-30	AT4G22758.1	3e-38	unknown protein; LOCATED IN: chloroplast; BEST Arabidopsis thaliana protein match is: unknown protein (TAIR:AT2G27830.1).	-	-	-	-	GO:0005634	nucleus	5.78141	4.91048	4.12404	3.28664	-1.35736	0.97597	1.59224	1.58434	1.30282
Glyma.01G212700	Glyma01g42190	ER-derived vesicles protein ERV14	B7FJU3_MEDTR	4e-70	AT1G12390.1	2e-65	Cornichon family protein	GO:0035556	intracellular sig-l transduction	GO:0005515	protein binding	GO:0016020	membrane	5.69066	2.89234	2.63553	-1.52331	NA	NA	NA	NA	NA
Glyma.01G213000	Glyma01g42220	MATE efflux family protein	I1J9Z8_SOYBN	0	AT4G22790.1	0	MATE efflux family protein	GO:0006855 GO:0055085	drug transmembrane transport; "transmembrane transport"	GO:0005215 GO:0015238 GO:0015297	antiporter activity; "drug transmembrane transporter activity"; "transporter activity"	GO:0005886 GO:0016020	membrane; "plasma membrane"	6.07181	4.89966	4.86809	3.16099	0.0476376	1.53107	1.88461	1.81945	2.1584
Glyma.01G213200	Glyma01g42240	Kinesin-1	G7KEW4_MEDTR	0	AT1G12430.1	0	armadillo repeat kinesin 3	GO:0007018 GO:0009855 GO:0009887 GO:0010051 GO:0048439 GO:0048519	determi-tion of bilateral symmetry; "flower morphogenesis"; "microtubule-based movement"; "negative regulation of biological process"; "organ morphogenesis"; "xylem and phloem pattern formation"	GO:0003777 GO:0005524	ATP binding; "microtubule motor activity"	GO:0009574	preprophase band	8.58149	6.46751	6.22509	4.44923	1.53488	2.46949	2.05146	2.00372	2.1584
Glyma.01G213300	Glyma01g42250	Ycf49-like protein	G7KEW0_MEDTR	6e-75	AT4G22830.1	3e-56	unknown protein; FUNCTIONS IN: molecular_function unknown; INVOLVED IN: biological_process unknown; LOCATED IN: chloroplast; EXPRESSED IN: 20 plant structures; EXPRESSED DURING: 13 growth stages; CONTAINS InterPro DOMAIN/s: Protein of unknown function DUF2499 (InterPro:IPR019634); Has 319 Blast hits to 317 proteins in 103 species: Archae - 0; Bacteria - 147; Metazoa - 0; Fungi - 0; Plants - 64; V…	GO:0008150 GO:0010207	biological process; "photosystem II assembly"	GO:0003674	molecular function	GO:0005886 GO:0009507	chloroplast; "plasma membrane"	6.47627	7.10874	7.32405	6.4269	4.54771	4.79373	4.983	5.04116	4.92411
Glyma.01G213400	Glyma01g42260	Ileal sodium/bile acid cotransporter	G7KEV9_MEDTR	0	AT4G22840.1	2e-156	Sodium Bile acid symporter family	GO:0006814 GO:0035725	sodium ion transmembrane transport; "sodium ion transport"	GO:0005215 GO:0008508	bile acid:sodium symporter activity; "transporter activity"	GO:0009941 GO:0016020	chloroplast envelope; "membrane"	4.80129	2.90037	2.70174	0.810636	NA	-0.986998	-0.891919	-0.91204	-1.07126
Glyma.01G213600	Glyma01g42280	Protein kinase like protein	G7KEV5_MEDTR	0	AT1G12460.1	0	Leucine-rich repeat protein kinase family protein	GO:0002237 GO:0006468 GO:0007165 GO:0007169 GO:0010103 GO:0048443	protein phosphorylation; "response to molecule of bacterial origin"; "sig-l transduction"; "stamen development"; "stomatal complex morphogenesis"; "transmembrane receptor protein tyrosine ki-se sig-ling pathway"	GO:0004672 GO:0004674 GO:0005524 GO:0016301 GO:0016772	ATP binding; "ki-se activity"; "protein ki-se activity"; "protein serine/threonine ki-se activity"; "transferase activity, transferring phosphorus-containing groups"	GO:0005886	plasma membrane	8.44023	6.43861	6.65371	4.90473	2.65725	3.04987	2.87302	2.908	2.84141
Glyma.01G213800	Glyma01g42300	Cell cycle regulated microtubule associated protein	A8MS21_ARATH	2e-101	AT4G22860.1	5e-133	Cell cycle regulated microtubule associated protein	GO:0000226 GO:0000911 GO:0006342 GO:0006346 GO:0008150 GO:0009909 GO:0016458 GO:0031048 GO:0034968 GO:0042127 GO:0051567	biological process; "chromatin silencing"; "chromatin silencing by small R-"; "cytokinesis by cell plate formation"; "gene silencing"; "histone H3-K9 methylation"; "histone lysine methylation"; "methylation-dependent chromatin silencing"; "microtubule cytoskeleton organization"; "regulation of cell proliferation"; "regulation of flower development"	GO:0003674	molecular function	GO:0005634 GO:0005739	mitochondrion; "nucleus"	3.68519	5.51858	1.84427	3.92388	5.22081	6.1403	4.82009	4.83513	4.64374
Glyma.01G214200	Glyma01g42350	Anthocyanidin synthase 2	Q2TUV8_SOYBN	0	AT4G22880.2	0	leucoanthocyanidin dioxygenase	GO:0007033 GO:0009611 GO:0009718 GO:0009753 GO:0010023 GO:0055114	anthocyanin-containing compound biosynthetic process; "oxidation-reduction process"; "proanthocyanidin biosynthetic process"; "response to jasmonic acid stimulus"; "response to wounding"; "vacuole organization"	GO:0016491 GO:0016706 GO:0050589	leucocyanidin oxyge-se activity; "oxidoreductase activity"; "oxidoreductase activity, acting on paired donors, with incorporation or reduction of molecular oxygen, 2-oxoglutarate as one donor, and incorporation of one atom each of oxygen into both donors"	GO:0005737	cytoplasm	4.09748	2.61366	3.0012	0.810636	1.67486	1.84561	0.11726	0.0787796	-0.0798389
Glyma.01G215100	Glyma01g42420	Phospholipase D	I1JA23_SOYBN	0	AT2G42010.1	0	phospholipase D beta 1	GO:0008152 GO:0009816 GO:0046686	defense response to bacterium, incompatible interaction; "metabolic process"; "response to cadmium ion"	GO:0003824 GO:0004630 GO:0005515 GO:0005546	catalytic activity; "phosphatidylinositol-4,5-bisphosphate binding"; "phospholipase D activity"; "protein binding"	GO:0005634 GO:0009506	nucleus; "plasmodesma"	5.50183	3.6541	4.06837	1.24361	1.88607	3.37163	3.36334	3.30668	3.03249
Glyma.01G215500	Glyma01g42450	Hydroxymethylglutaryl-CoA synthase	G7KER8_MEDTR	0	AT4G11820.2	0	hydroxymethylglutaryl-CoA synthase / HMG-CoA synthase / 3-hydroxy-3-methylglutaryl coenzyme A synthase	GO:0006084 GO:0008152 GO:0008299 GO:0019287	acetyl-CoA metabolic process; "isopentenyl diphosphate biosynthetic process, mevalo-te pathway"; "isoprenoid biosynthetic process"; "metabolic process"	GO:0003824 GO:0004421	catalytic activity; "hydroxymethylglutaryl-CoA synthase activity"	GO:0005739 GO:0005829 GO:0009506	cytosol; "mitochondrion"; "plasmodesma"	9.50802	8.29144	7.69697	6.46553	2.09154	2.63718	2.89497	3.01212	2.0047
Glyma.01G215700	Glyma01g42480	DNA-directed RNA polymerase	I1JA29_SOYBN	0	AT1G63020.2	0	nuclear RNA polymerase D1A	GO:0006306 GO:0006342 GO:0006346 GO:0006351 GO:0006354 GO:0007267 GO:0009616 GO:0010267 GO:0010495 GO:0016246 GO:0016569 GO:0030422 GO:0031047 GO:0031048 GO:0035196 GO:0051567	D--dependent transcription, elongation; "D- methylation"; "R- interference"; "cell-cell sig-ling"; "chromatin silencing"; "chromatin silencing by small R-"; "covalent chromatin modification"; "gene silencing by R-"; "histone H3-K9 methylation"; "long-distance posttranscriptio-l gene silencing"; "methylation-dependent chromatin silencing"; "production of miR-s involved in gene silencing by miR-"; …	GO:0003677 GO:0003899 GO:0005515	D--directed R- polymerase activity; "D- binding"; "protein binding"	GO:0000418 GO:0005634 GO:0005654	D--directed R- polymerase IV complex; "nucleoplasm"; "nucleus"	7.02016	4.91665	4.60508	2.97818	1.98467	2.66456	1.96491	1.99239	0.951408
Glyma.01G216000	Glyma01g42500	CBF3 protein	B3TPR9_SOYBN	1e-165	AT1G12610.1	5e-58	Integrase-type DNA-binding superfamily protein	GO:0006355 GO:0009408 GO:0009414 GO:0009651 GO:0010371 GO:0016049 GO:0048510 GO:0050826	cell growth; "regulation of gibberellin biosynthetic process"; "regulation of timing of transition from vegetative to reproductive phase"; "regulation of transcription, D--dependent"; "response to freezing"; "response to heat"; "response to salt stress"; "response to water deprivation"	GO:0003677 GO:0003700 GO:0043565	D- binding; "sequence-specific D- binding"; "sequence-specific D- binding transcription factor activity"	GO:0005634	nucleus	7.77338	4.23283	4.80227	0.810636	0.503705	1.55591	1.83869	1.81051	1.25805
Glyma.01G216600	Glyma01g42560	MATE efflux family protein	I1JA40_SOYBN	0	AT4G23030.1	0	MATE efflux family protein	GO:0006855 GO:0055085	drug transmembrane transport; "transmembrane transport"	GO:0005215 GO:0015238 GO:0015297	antiporter activity; "drug transmembrane transporter activity"; "transporter activity"	GO:0005886 GO:0016020	membrane; "plasma membrane"	6.90339	4.58068	4.96718	5.02018	1.24486	-0.000621929	0.54722	0.563364	0.00225974
Glyma.01G216800	Glyma01g42570	-	-	-	-	-	-	-	-	-	-	-	-	-0.469402	-1.00977	-0.0156059	NA	0.0476376	1.28297	1.41454	1.35109	2.51016
Glyma.01G217200	Glyma01g42620	IQ-domain 22	D7MDX4_ARALL	7e-55	AT4G23060.1	3e-57	IQ-domain 22	GO:0009739	response to gibberellin stimulus	GO:0005516	calmodulin binding	GO:0005634	nucleus	6.68566	4.97581	5.17466	3.21452	0.376098	0.964291	1.83869	1.81051	1.54812
Glyma.01G217500	Glyma01g42650	Myb	G7KDF4_MEDTR	4e-136	AT5G02320.2	3e-76	myb domain protein 3r-5	GO:0006355	regulation of transcription, D--dependent	GO:0003677 GO:0003700	D- binding; "sequence-specific D- binding transcription factor activity"	GO:0005634	nucleus	5.42588	3.528	3.68264	2.3276	1.29575	2.59881	4.1854	4.43432	5.1733
Glyma.01G217600	#N/A	PR-5 protein	A1IGE2_SOYBN	5e-151	AT4G11650.1	2e-101	osmotin 34	GO:0009651 GO:0009816 GO:0009817 GO:0051707	defense response to bacterium, incompatible interaction; "defense response to fungus, incompatible interaction"; "response to other organism"; "response to salt stress"	-	-	GO:0005576	extracellular region	4.72679	8.12173	8.53608	7.03414	4.83224	3.51219	1.29906	1.31204	2.07328
Glyma.01G218000	Glyma01g42695	Remorin	G7KDE4_MEDTR	6e-59	AT5G23750.2	1e-49	Remorin family protein	GO:0008150 GO:0042546	biological process; "cell wall biogenesis"	GO:0003677	D- binding	GO:0005634	nucleus	2.51654	1.49131	1.43083	-1.52331	0.503705	0.998455	0.632741	0.608358	-0.0798389
Glyma.01G218100	Glyma01g42710	Transport family protein	B9GWG2_POPTR	0	AT1G63300.1	0	Myosin heavy chain-related protein	GO:0008150	biological process	GO:0003674	molecular function	-	-	7.03414	4.11191	3.5946	2.83461	3.77927	3.98104	3.49645	3.35936	3.40062
Glyma.01G218200	Glyma01g42720	F2K11.21	D7KTH6_ARALL	2e-45	AT1G63410.1	1e-42	Protein of unknown function (DUF567)	GO:0008150	biological process	GO:0003674	molecular function	GO:0005634	nucleus	5.48815	8.74902	9.06189	7.9763	5.08549	5.03478	5.94966	5.87078	5.74977
Glyma.01G218500	#N/A	Proton-coupled amino acid transporter	G7KQT1_MEDTR	1e-09	AT2G41190.1	4e-12	Transmembrane amino acid transporter family protein	GO:0006865	amino acid transport	GO:0015171	amino acid transmembrane transporter activity	GO:0005774 GO:0005886 GO:0016020	membrane; "plasma membrane"; "vacuolar membrane"	5.93872	9.98173	9.82999	7.95993	5.44044	4.82514	5.25286	5.44912	5.62755
Glyma.01G218600	Glyma01g42751	Amino acid transporter family protein	G7JSI7_MEDTR	0	AT2G41190.1	5e-174	Transmembrane amino acid transporter family protein	GO:0006865	amino acid transport	GO:0015171	amino acid transmembrane transporter activity	GO:0005774 GO:0005886 GO:0016020	membrane; "plasma membrane"; "vacuolar membrane"	8.26725	12.8317	12.6276	10.4974	8.72152	8.001	8.26883	8.4948	8.39268
Glyma.01G218800	Glyma01g42770	Leucine-rich repeat transmembrane protein kinase	B9GKK0_POPTR	0	AT1G63430.1	0	Leucine-rich repeat protein kinase family protein	GO:0000394 GO:0006468 GO:0007169 GO:0009086	R- splicing, via endonucleolytic cleavage and ligation; "methionine biosynthetic process"; "protein phosphorylation"; "transmembrane receptor protein tyrosine ki-se sig-ling pathway"	GO:0004672 GO:0004674 GO:0004713 GO:0005524 GO:0016772	ATP binding; "protein ki-se activity"; "protein serine/threonine ki-se activity"; "protein tyrosine ki-se activity"; "transferase activity, transferring phosphorus-containing groups"	GO:0005886	plasma membrane	4.95849	4.50889	3.63952	3.40437	0.503705	0.00114721	NA	NA	-0.927841
Glyma.01G219000	Glyma01g42790	Heavy metal P-type ATPase	G7KDC8_MEDTR	0	AT1G63440.1	0	heavy metal atpase 5	GO:0006754 GO:0006812 GO:0008152 GO:0010043 GO:0010273 GO:0030001 GO:0046034 GO:0046688	ATP biosynthetic process; "ATP metabolic process"; "cation transport"; "detoxification of copper ion"; "metabolic process"; "metal ion transport"; "response to copper ion"; "response to zinc ion"	GO:0000166 GO:0003824 GO:0005524 GO:0015662 GO:0043682 GO:0046872	ATP binding; "ATPase activity, coupled to transmembrane movement of ions, phosphorylative mechanism"; "catalytic activity"; "copper-transporting ATPase activity"; "metal ion binding"; "nucleotide binding"	GO:0005886 GO:0016020 GO:0016021	integral to membrane; "membrane"; "plasma membrane"	8.16987	8.42297	8.4265	7.00718	5.41611	5.57063	5.3293	5.45672	4.58871
Glyma.01G219200	Glyma01g42820	Glutathione peroxidase	G7KC44_MEDTR	0	AT4G11610.1	0	C2 calcium/lipid-binding plant phosphoribosyltransferase family protein	GO:0008150	biological process	GO:0003674	molecular function	GO:0005575	cellular component	4.4314	3.24474	2.58787	1.24361	NA	NA	-0.114753	-0.081287	NA
Glyma.01G219600	Glyma01g42870	DNA-binding PD1-like protein	G7KC38_MEDTR	2e-142	AT1G63470.1	1e-94	AT hook motif DNA-binding family protein	GO:0000226 GO:0000280 GO:0000911 GO:0006260 GO:0006306 GO:0006342 GO:0006346 GO:0007000 GO:0007267 GO:0008150 GO:0008283 GO:0009616 GO:0009909 GO:0010267 GO:0016246 GO:0016458 GO:0016570 GO:0016571 GO:0016572 GO:0031047 GO:0031048 GO:0034968 GO:0035196 GO:0048449 GO:0051225 GO:0051567	D- methylation; "D- replication"; "R- interference"; "biological process"; "cell-cell sig-ling"; "cell proliferation"; "chromatin silencing"; "chromatin silencing by small R-"; "cytokinesis by cell plate formation"; "floral organ formation"; "gene silencing"; "gene silencing by R-"; "histone H3-K9 methylation"; "histone lysine methylation"; "histone methylation"; "histone modification"; "histone …	GO:0003677	D- binding	GO:0005634	nucleus	7.9787	6.54384	6.22115	5.51595	4.00933	4.63102	4.38513	4.17854	3.95094
Glyma.01G219900	Glyma01g42900	Glutamate-cysteine ligase	G7KC28_MEDTR	0	AT4G23100.3	0	glutamate-cysteine ligase	GO:0002213 GO:0006007 GO:0006094 GO:0006096 GO:0006750 GO:0009408 GO:0009651 GO:0009700 GO:0009753 GO:0009816 GO:0009908 GO:0010193 GO:0019344 GO:0019761 GO:0030244 GO:0042742 GO:0046686 GO:0050832 GO:0052544	cellulose biosynthetic process; "cysteine biosynthetic process"; "defense response by callose deposition in cell wall"; "defense response to bacterium"; "defense response to bacterium, incompatible interaction"; "defense response to fungus"; "defense response to insect"; "flower development"; "gluconeogenesis"; "glucose catabolic process"; "glucosinolate biosynthetic process"; "glutathione biosyn…	GO:0004357	glutamate-cysteine ligase activity	GO:0009507 GO:0009536 GO:0009570	chloroplast; "chloroplast stroma"; "plastid"	13.34	17.0496	17.0604	16.3708	14.0109	13.5774	14.5478	14.7114	14.5941
Glyma.01G220300	Glyma01g42930	-	-	-	AT4G11450.1	2e-106	Protein of unknown function (DUF3527)	GO:0008150 GO:0010089 GO:0044036	biological process; "cell wall macromolecule metabolic process"; "xylem development"	-	-	GO:0005634	nucleus	4.96881	3.84041	3.55579	2.21175	1.93451	1.79071	1.1338	1.06224	0.90452
Glyma.01G220500	#N/A	-	-	-	-	-	-	-	-	-	-	-	-	2.80699	3.19432	2.63	2.94086	2.05372	0.998455	0.632741	0.608358	0.55635
Glyma.01G220600	Glyma01g42950	Aquaporin	G7KC21_MEDTR	0	AT4G00430.1	0	plasma membrane intrinsic protein 1;4	GO:0006810 GO:0006826 GO:0006833 GO:0009414 GO:0010106	cellular response to iron ion starvation; "iron ion transport"; "response to water deprivation"; "transport"; "water transport"	GO:0005215 GO:0015250	transporter activity; "water channel activity"	GO:0005886 GO:0016020 GO:0016021	integral to membrane; "membrane"; "plasma membrane"	8.21501	5.26955	4.78014	3.53436	5.61579	6.77031	7.14584	7.20964	7.15313
Glyma.01G220700	Glyma01g42960	YODA family protein	B9GWS8_POPTR	0	AT1G63700.1	0	Protein kinase superfamily protein	GO:0007155 GO:0009793 GO:0010090 GO:0010103 GO:0010229 GO:0045010 GO:0048765 GO:0071555	actin nucleation; "cell adhesion"; "cell wall organization"; "embryo development ending in seed dormancy"; "inflorescence development"; "root hair cell differentiation"; "stomatal complex morphogenesis"; "trichome morphogenesis"	GO:0004672 GO:0005524 GO:0016301 GO:0016772	ATP binding; "ki-se activity"; "protein ki-se activity"; "transferase activity, transferring phosphorus-containing groups"	GO:0005737	cytoplasm	7.77634	6.03002	5.88883	5.18369	3.79408	4.01893	3.27593	3.23687	3.05746
Glyma.01G220900	Glyma01g42981	Transmembrane receptor	D7M947_ARALL	0	AT4G23440.1	0	Disease resistance protein (TIR-NBS class)	GO:0000271 GO:0007165 GO:0009630	gravitropism; "polysaccharide biosynthetic process"; "sig-l transduction"	GO:0000166 GO:0017111 GO:0043531	ADP binding; "nucleoside-triphosphatase activity"; "nucleotide binding"	GO:0005622 GO:0005634 GO:0005886	intracellular; "nucleus"; "plasma membrane"	3.5142	3.29255	3.15047	2.53924	0.0476376	0.97597	1.35783	1.33157	1.58888
Glyma.01G221100	Glyma01g43001	Zinc finger protein CONSTANS-like protein	G7KC16_MEDTR	2e-81	AT5G41380.1	3e-48	CCT motif family protein	GO:0008150	biological process	GO:0003674	molecular function	GO:0005634	nucleus	9.10066	5.07057	5.17376	0.46158	-0.362116	1.30728	0.710769	0.655196	0.497073
Glyma.01G221200	Glyma01g43010	Hydroxyproline-rich glycoprotein family protein	V5-U3_PHAVU	5e-139	AT4G23470.3	5e-120	PLAC8 family protein	GO:0006970 GO:0009697 GO:0009863 GO:0010167 GO:0015706 GO:0031348 GO:0045087 GO:0046686 GO:0048767	in-te immune response; "negative regulation of defense response"; "nitrate transport"; "response to cadmium ion"; "response to nitrate"; "response to osmotic stress"; "root hair elongation"; "salicylic acid biosynthetic process"; "salicylic acid mediated sig-ling pathway"	-	-	GO:0005634	nucleus	3.63407	1.80563	1.93913	-0.47091	-1.35736	-1.01334	NA	NA	-0.927841
Glyma.01G221300	Glyma01g43020	BRH1 RING finger protein	Q9XF92_ARATH	2e-52	AT3G61460.1	2e-55	brassinosteroid-responsive RING-H2	GO:0009741 GO:0010200 GO:0030003 GO:0070838	cellular cation homeostasis; "divalent metal ion transport"; "response to brassinosteroid stimulus"; "response to chitin"	GO:0008270	zinc ion binding	GO:0005634	nucleus	8.8396	11.6505	11.5669	10.4596	8.90297	7.76303	8.14965	8.79285	8.51885
Glyma.01G221500	Glyma01g43040	Bell-like homeodomain protein 3 (Fragment)	Q7Y0Z9_SOLLC	0	AT5G41410.1	1e-139	POX (plant homeobox) family protein	GO:0006355 GO:0009862 GO:0048481 GO:0048513	organ development; "ovule development"; "regulation of transcription, D--dependent"; "systemic acquired resistance, salicylic acid mediated sig-ling pathway"	GO:0003677 GO:0003700 GO:0005515 GO:0043565	D- binding; "protein binding"; "sequence-specific D- binding"; "sequence-specific D- binding transcription factor activity"	GO:0005634 GO:0005829 GO:0009506	cytosol; "nucleus"; "plasmodesma"	6.70722	6.18246	6.14915	4.91389	2.88467	2.76604	2.15869	2.16598	1.79287
Glyma.01G221600	Glyma01g43050	Transferase, transferring glycosyl groups	D7LZJ1_ARALL	0	AT5G41460.1	0	Protein of unknown function (DUF604)	GO:0008150	biological process	GO:0016757	transferase activity, transferring glycosyl groups	GO:0005794	Golgi apparatus	5.97967	5.252	5.66943	5.5791	0.0476376	-1.01334	NA	NA	NA
Glyma.01G221900	Glyma01g43080	Protein SPIRAL1-like 2	SP1L2_ARATH	6e-16	AT1G69230.2	7e-19	SPIRAL1-like2	GO:0008150	biological process	GO:0003674	molecular function	GO:0005886	plasma membrane	2.51654	1.49131	1.12782	-1.52331	NA	NA	NA	NA	NA
Glyma.01G222000	Glyma01g43100	Mitogen-activated protein kinase	G7KC07_MEDTR	0	AT4G01370.1	0	MAP kinase 4	GO:0000165 GO:0006096 GO:0006355 GO:0006468 GO:0006612 GO:0006833 GO:0006970 GO:0006972 GO:0007030 GO:0007112 GO:0007154 GO:0007165 GO:0009266 GO:0009409 GO:0009414 GO:0009555 GO:0009595 GO:0009611 GO:0009617 GO:0009620 GO:0009651 GO:0009697 GO:0009723 GO:0009733 GO:0009737 GO:0009738 GO:0009753 GO:0009861 GO:0009862 GO:0009863 GO:0009867 GO:0009868 GO:0010200 GO:0010310 GO:0010363 GO:0010374 GO:…	Golgi organization; "MAPK cascade"; "abscisic acid mediated sig-ling pathway"; "cell communication"; "cortical microtubule organization"; "defense response to bacterium"; "defense response to fungus"; "detection of biotic stimulus"; "endoplasmic reticulum unfolded protein response"; "glycolysis"; "hyperosmotic response"; "hyperosmotic salinity response"; "hypotonic salinity response"; "intracellu…	GO:0004672 GO:0004707 GO:0005515 GO:0016301	MAP ki-se activity; "ki-se activity"; "protein binding"; "protein ki-se activity"	GO:0005634 GO:0005737 GO:0005829	cytoplasm; "cytosol"; "nucleus"	5.13859	5.24658	5.11364	4.48532	1.1166	2.80509	3.30296	3.23029	2.82265
Glyma.01G222600	Glyma01g43180	-	-	-	AT5G41590.1	1e-56	Protein of unknown function (DUF567)	GO:0008150	biological process	GO:0003674	molecular function	GO:0005575	cellular component	9.46632	8.84461	8.83784	9.38422	8.06025	6.61263	6.38897	7.00175	6.88641
Glyma.01G223600	Glyma01g43280	Na+/H+ antiporter-like protein	G7KAQ3_MEDTR	0	AT5G41610.1	0	cation/H+ exchanger 18	GO:0006812 GO:0006885 GO:0035725 GO:0055085	cation transport; "regulation of pH"; "sodium ion transmembrane transport"; "transmembrane transport"	GO:0005451 GO:0015299 GO:0015385	monovalent cation:hydrogen antiporter activity; "sodium:hydrogen antiporter activity"; "solute:hydrogen antiporter activity"	GO:0005770 GO:0009507 GO:0016021	chloroplast; "integral to membrane"; "late endosome"	8.62846	7.93206	8.16117	7.58326	5.43434	5.47935	5.66999	5.54656	5.4158
Glyma.01G223700	Glyma01g43290	Intracellular protein transport protein USO1-like protein	F4I5B1_ARATH	6e-135	AT5G41620.1	8e-178	FUNCTIONS IN: molecular_function unknown; INVOLVED IN: biological_process unknown; LOCATED IN: chloroplast, plasma membrane; EXPRESSED IN: 9 plant structures; EXPRESSED DURING: 6 growth stages; BEST Arabidopsis thaliana protein match is: intracellular protein transport protein USO1-related (TAIR:AT1G64180.1); Has 30201 Blast hits to 17322 proteins in 780 species: Archae - 12; Bacteria - 1396; Met…	GO:0008150	biological process	GO:0003674	molecular function	GO:0005737 GO:0005886 GO:0009507	chloroplast; "cytoplasm"; "plasma membrane"	8.16265	7.5347	7.34475	7.11466	5.86624	5.1711	5.41302	5.83693	5.12027
Glyma.01G223900	Glyma01g43321	Apospory-associated protein C	G7KAP1_MEDTR	0	AT4G23730.1	4e-157	Galactose mutarotase-like superfamily protein	GO:0005975 GO:0006012	carbohydrate metabolic process; "galactose metabolic process"	GO:0003824 GO:0004034 GO:0016853 GO:0030246	aldose 1-epimerase activity; "carbohydrate binding"; "catalytic activity"; "isomerase activity"	GO:0005634	nucleus	3.61403	2.00293	1.93913	-1.52331	NA	NA	-1.10717	-1.08887	NA
Glyma.01G224000	Glyma01g43340	Leucine-rich repeat transmembrane protein kinase	B9GX60_POPTR	0	AT4G23740.1	0	Leucine-rich repeat protein kinase family protein	GO:0006468 GO:0007169 GO:0010075	protein phosphorylation; "regulation of meristem growth"; "transmembrane receptor protein tyrosine ki-se sig-ling pathway"	GO:0004672 GO:0004674 GO:0004713 GO:0005524 GO:0016301 GO:0016772	ATP binding; "ki-se activity"; "protein ki-se activity"; "protein serine/threonine ki-se activity"; "protein tyrosine ki-se activity"; "transferase activity, transferring phosphorus-containing groups"	GO:0005886	plasma membrane	4.74107	3.4532	3.033	1.42834	NA	NA	NA	NA	NA
Glyma.01G224100	Glyma01g43350	Ethylene-responsive transcription factor RAP2-6	G7KAN6_MEDTR	1e-71	AT4G23750.2	9e-50	cytokinin response factor 2	GO:0006355 GO:0006606 GO:0042991 GO:0048364 GO:0048825	cotyledon development; "protein import into nucleus"; "regulation of transcription, D--dependent"; "root development"; "transcription factor import into nucleus"	GO:0003677 GO:0003700 GO:0005515 GO:0042802	D- binding; "identical protein binding"; "protein binding"; "sequence-specific D- binding transcription factor activity"	GO:0005634	nucleus	4.70629	3.88205	3.15445	2.74747	-0.362116	0.592839	0.936542	0.970544	1.66773
Glyma.01G224400	Glyma01g43380	Mitochondrial substrate carrier family protein	B9I8V0_POPTR	0	AT4G01100.1	0	adenine nucleotide transporter 1	GO:0006007 GO:0006096 GO:0006098 GO:0006810 GO:0006839 GO:0009060 GO:0009651 GO:0015866 GO:0015867 GO:0046686 GO:0055085 GO:0080121	ADP transport; "AMP transport"; "ATP transport"; "aerobic respiration"; "glucose catabolic process"; "glycolysis"; "mitochondrial transport"; "pentose-phosphate shunt"; "response to cadmium ion"; "response to salt stress"; "transmembrane transport"; "transport"	GO:0005347 GO:0015217 GO:0080122	ADP transmembrane transporter activity; "AMP transmembrane transporter activity"; "ATP transmembrane transporter activity"	GO:0005739 GO:0005743 GO:0005774 GO:0009536 GO:0016020	membrane; "mitochondrial inner membrane"; "mitochondrion"; "plastid"; "vacuolar membrane"	3.77825	6.07024	6.02194	5.13368	2.58072	1.84561	1.00604	1.00061	0.55635
Glyma.01G224500	Glyma01g43390	Lysine histidine transporter 1-like protein	T2DMR0_PHAVU	0	AT5G41800.1	0	Transmembrane amino acid transporter family protein	GO:0006865 GO:0015824	amino acid transport; "proline transport"	GO:0015171	amino acid transmembrane transporter activity	GO:0005886 GO:0016020	membrane; "plasma membrane"	2.47103	3.7748	1.67547	4.02233	4.74667	5.15438	5.16771	5.26246	4.90999
Glyma.01G224700	Glyma01g43410	WD40 repeat nucleoporin similar to SEH1	D7UPM8_LOTJA	0	AT1G64350.1	2e-164	Transducin/WD40 repeat-like superfamily protein	GO:0006626 GO:0006635 GO:0043161 GO:0043248 GO:0051788	fatty acid beta-oxidation; "proteasomal ubiquitin-dependent protein catabolic process"; "proteasome assembly"; "protein targeting to mitochondrion"; "response to misfolded protein"	GO:0000166 GO:0005515	nucleotide binding; "protein binding"	GO:0005635 GO:0005737 GO:0005834	cytoplasm; "heterotrimeric G-protein complex"; "nuclear envelope"	5.12704	3.41014	3.29042	1.45771	-1.35736	-0.000621929	1.48808	1.55496	0.618643
Glyma.01G224800	Glyma01g43420	WRKY12 (Fragment)	A7LHF9_SOYBN	1e-138	AT4G11070.1	1e-58	WRKY family transcription factor	GO:0006355	regulation of transcription, D--dependent	GO:0003700 GO:0043565	sequence-specific D- binding; "sequence-specific D- binding transcription factor activity"	GO:0005634	nucleus	8.1027	5.00682	5.39119	2.24814	-0.639723	-0.986998	-0.891919	-0.91204	-1.07126
Glyma.01G225000	Glyma01g43450	AP2 domain-containing transcription factor 9	C9WA67_SOYBN	7e-139	AT1G64380.1	3e-65	Integrase-type DNA-binding superfamily protein	GO:0006355 GO:0010200 GO:0015824	proline transport; "regulation of transcription, D--dependent"; "response to chitin"	GO:0003677 GO:0003700	D- binding; "sequence-specific D- binding transcription factor activity"	GO:0005634	nucleus	2.82047	2.06921	1.56186	0.0555561	-0.362116	0.00114721	NA	NA	NA
Glyma.01G225100	Glyma01g43460	Protein phosphatase 2C	G7KAL2_MEDTR	9e-144	AT2G29380.1	7e-83	highly ABA-induced PP2C gene 3	GO:0006470	protein dephosphorylation	GO:0003824 GO:0004722	catalytic activity; "protein serine/threonine phosphatase activity"	GO:0005886 GO:0008287	plasma membrane; "protein serine/threonine phosphatase complex"	7.2321	7.79578	7.96525	9.45179	9.6513	10.3081	11.0993	10.8745	10.7881
Glyma.01G225800	Glyma01g43540	UDP-glucose 4-epimerase	G7K9B4_MEDTR	0	AT4G10960.1	0	UDP-D-glucose/UDP-D-galactose 4-epimerase 5	GO:0005975 GO:0006012 GO:0044237	carbohydrate metabolic process; "cellular metabolic process"; "galactose metabolic process"	GO:0000166 GO:0003824 GO:0003978 GO:0016857 GO:0046983 GO:0050662	UDP-glucose 4-epimerase activity; "catalytic activity"; "coenzyme binding"; "nucleotide binding"; "protein dimerization activity"; "racemase and epimerase activity, acting on carbohydrates and derivatives"	GO:0005794	Golgi apparatus	11.3885	15.1122	15.0771	14.1991	13.2949	13.1559	13.6673	13.6847	13.535
Glyma.01G226000	Glyma01g43560	Triacylglycerol lipase 3	F1AM72_ARAHY	0	AT4G10955.2	4e-158	alpha/beta-Hydrolases superfamily protein	GO:0006629	lipid metabolic process	GO:0004806	triglyceride lipase activity	GO:0005634	nucleus	8.17259	5.37725	5.11847	2.61428	4.39342	5.81342	5.19299	5.05051	5.41922
Glyma.01G226100	Glyma01g43570	Proline-rich family protein	B9GXJ6_POPTR	2e-75	AT4G23930.1	4e-68	Late embryogenesis abundant (LEA) hydroxyproline-rich glycoprotein family	GO:0008150	biological process	GO:0003674	molecular function	GO:0005576	extracellular region	8.21785	7.31617	7.64629	6.16511	3.70935	3.25482	3.04241	2.98861	2.98166
Glyma.01G226600	Glyma01g43620	GRAS family transcription factor	G7K9A5_MEDTR	0	AT1G50420.1	0	scarecrow-like 3	GO:0006355 GO:0009739	regulation of transcription, D--dependent; "response to gibberellin stimulus"	GO:0003700	sequence-specific D- binding transcription factor activity	GO:0005634	nucleus	7.39331	5.07166	5.05396	2.97818	1.70276	2.07669	1.23988	1.29073	0.00225974
Glyma.01G226700	Glyma01g43630	Magnesium-chelatase subunit ChlD, chloroplastic	CHLD_PEA	0	AT1G08520.1	0	ALBINA 1	GO:0009690 GO:0015979 GO:0015995 GO:0019288	chlorophyll biosynthetic process; "cytokinin metabolic process"; "isopentenyl diphosphate biosynthetic process, mevalo-te-independent pathway"; "photosynthesis"	GO:0000166 GO:0005524 GO:0016851 GO:0017111	ATP binding; "magnesium chelatase activity"; "nucleoside-triphosphatase activity"; "nucleotide binding"	GO:0009507 GO:0009534 GO:0009570 GO:0010007	chloroplast; "chloroplast stroma"; "chloroplast thylakoid"; "magnesium chelatase complex"	8.32803	7.66981	7.48062	6.89436	5.67591	5.42508	5.41761	5.34149	5.24003
Glyma.01G227100	Glyma01g43691	Chaperone protein dnaJ	G7JQK6_MEDTR	0	AT5G12430.1	0	Heat shock protein DnaJ with tetratricopeptide repeat	GO:0006457 GO:0007155 GO:0010090 GO:0010228 GO:0016926 GO:0045010 GO:0048765 GO:0050665 GO:0071555	actin nucleation; "cell adhesion"; "cell wall organization"; "hydrogen peroxide biosynthetic process"; "protein desumoylation"; "protein folding"; "root hair cell differentiation"; "trichome morphogenesis"; "vegetative to reproductive phase transition of meristem"	GO:0031072	heat shock protein binding	-	-	4.2475	3.17625	2.29532	1.61804	0.844749	1.02081	0.0047454	0.00190919	-1.07126
Glyma.01G227200	Glyma01g43700	Zinc finger CCCH domain-containing protein	G7K989_MEDTR	0	AT5G12440.3	2e-134	CCCH-type zinc fingerfamily protein with RNA-binding domain	GO:0008150	biological process	GO:0000166 GO:0003676 GO:0008270	nucleic acid binding; "nucleotide binding"; "zinc ion binding"	GO:0005634	nucleus	8.73746	6.89812	6.63807	4.96524	1.93451	2.26151	2.13183	2.01801	2.26456
Glyma.01G227800	Glyma01g43771	Protein kinase family protein	Q9LQ29_ARATH	0	AT1G33770.1	0	Protein kinase superfamily protein	GO:0006468 GO:0006499	N-termi-l protein myristoylation; "protein phosphorylation"	GO:0004672 GO:0004674 GO:0005524 GO:0016301 GO:0016772	ATP binding; "ki-se activity"; "protein ki-se activity"; "protein serine/threonine ki-se activity"; "transferase activity, transferring phosphorus-containing groups"	GO:0005634	nucleus	4.85152	3.3027	3.0634	1.02941	-0.639723	-0.00299611	0.11726	0.0787796	0.55635
Glyma.01G228700	Glyma01g43880	Chalcone synthase 7	CHS7_SOYBN	0	AT5G13930.1	0	Chalcone and stilbene synthase family protein	GO:0006979 GO:0008152 GO:0009058 GO:0009411 GO:0009611 GO:0009629 GO:0009715 GO:0009718 GO:0009733 GO:0009744 GO:0009753 GO:0009813 GO:0009926 GO:0010224 GO:0031540	anthocyanin-containing compound biosynthetic process; "auxin polar transport"; "biosynthetic process"; "chalcone biosynthetic process"; "flavonoid biosynthetic process"; "metabolic process"; "regulation of anthocyanin biosynthetic process"; "response to UV"; "response to UV-B"; "response to auxin stimulus"; "response to gravity"; "response to jasmonic acid stimulus"; "response to oxidative stress…	GO:0003824 GO:0005515 GO:0016210 GO:0016746 GO:0016747	catalytic activity; "-ringenin-chalcone synthase activity"; "protein binding"; "transferase activity, transferring acyl groups"; "transferase activity, transferring acyl groups other than amino-acyl groups"	GO:0005634 GO:0005737 GO:0005783 GO:0009705	cytoplasm; "endoplasmic reticulum"; "nucleus"; "plant-type vacuole membrane"	11.7894	12.1298	12.0545	12.2312	9.18543	8.84298	9.79082	9.95587	9.88085
Glyma.01G229800	Glyma01g44000	Rubredoxin family protein	T2DP06_PHAVU	1e-162	AT5G17170.1	3e-139	rubredoxin family protein	GO:0006098 GO:0006364 GO:0009637 GO:0009657 GO:0010114 GO:0010207 GO:0010218	pentose-phosphate shunt; "photosystem II assembly"; "plastid organization"; "rR- processing"; "response to blue light"; "response to far red light"; "response to red light"	GO:0046872	metal ion binding	GO:0009507 GO:0009534 GO:0009535 GO:0009941	chloroplast; "chloroplast envelope"; "chloroplast thylakoid"; "chloroplast thylakoid membrane"	7.99622	9.89655	9.89209	9.45919	7.55049	7.35813	7.93947	8.17708	7.88337
Glyma.01G230200	Glyma01g44040	Hydrogen peroxide induced protein 1	J7F198_CAMSI	6e-28	AT3G03150.1	1e-22	unknown protein; FUNCTIONS IN: molecular_function unknown; INVOLVED IN: biological_process unknown; LOCATED IN: mitochondrion; EXPRESSED IN: 22 plant structures; EXPRESSED DURING: 13 growth stages; BEST Arabidopsis thaliana protein match is: unknown protein (TAIR:AT5G17165.1); Has 39 Blast hits to 39 proteins in 11 species: Archae - 0; Bacteria - 0; Metazoa - 0; Fungi - 0; Plants - 39; Viruses - …	GO:0008150	biological process	GO:0003674	molecular function	-	-	12.2169	9.86291	9.7828	7.79514	6.86055	7.12515	6.6761	6.93583	6.70796
Glyma.01G230300	Glyma01g44050	OSJNBa0013K16.11 protein	Q7XP56_ORYSJ	7e-57	AT5G41960.1	1e-60	unknown protein; FUNCTIONS IN: molecular_function unknown; INVOLVED IN: biological_process unknown; LOCATED IN: chloroplast; EXPRESSED IN: 22 plant structures; EXPRESSED DURING: 13 growth stages; Has 1807 Blast hits to 1807 proteins in 277 species: Archae - 0; Bacteria - 0; Metazoa - 736; Fungi - 347; Plants - 385; Viruses - 0; Other Eukaryotes - 339 (source: NCBI BLink).	GO:0008150	biological process	GO:0003674	molecular function	GO:0009507	chloroplast	8.00138	7.05757	7.02633	6.81139	5.26324	5.58124	5.46584	5.3665	5.4123
Glyma.01G230600	Glyma01g44080	BvCRP-1 protein	K4Q457_BETVU	0	AT5G42310.1	2e-112	Pentatricopeptide repeat (PPR-like) superfamily protein	-	-	-	-	GO:0005739 GO:0009507	chloroplast; "mitochondrion"	5.50183	3.6541	3.87135	2.7961	1.70276	2.80208	2.40616	2.3216	2.09318
Glyma.01G230900	Glyma01g44120	Cytochrome c	G7K7W9_MEDTR	4e-74	AT4G10040.1	7e-74	cytochrome c-2	-	-	GO:0005506 GO:0005507 GO:0009055 GO:0020037	copper ion binding; "electron carrier activity"; "heme binding"; "iron ion binding"	GO:0005739	mitochondrion	5.71821	4.82575	4.6052	3.78279	2.96674	2.3466	2.00847	1.99819	2.0047
Glyma.01G231000	Glyma01g44130	AP2 domain-containing transcription factor family protein	B9GX15_POPTR	9e-66	AT1G71450.1	5e-50	Integrase-type DNA-binding superfamily protein	GO:0006355	regulation of transcription, D--dependent	GO:0003677 GO:0003700	D- binding; "sequence-specific D- binding transcription factor activity"	GO:0005634	nucleus	4.9368	2.36867	2.66563	NA	NA	NA	NA	NA	NA
Glyma.01G231600	Glyma01g44190	Calcium-dependent protein kinase	G7K7Z0_MEDTR	0	AT4G10030.1	0	alpha/beta-Hydrolases superfamily protein	-	-	GO:0016787	hydrolase activity	-	-	7.01226	6.83061	6.49848	7.17169	8.37215	9.11198	8.69268	8.99037	8.55506
Glyma.01G232000	Glyma01g44230	Ethylene-responsive transcription factor ERF019	G7K978_MEDTR	2e-58	AT1G71520.1	6e-37	Integrase-type DNA-binding superfamily protein	GO:0006355 GO:0010200	regulation of transcription, D--dependent; "response to chitin"	GO:0003677 GO:0003700	D- binding; "sequence-specific D- binding transcription factor activity"	GO:0005634	nucleus	5.13412	3.18002	3.14875	0.46158	0.0476376	0.574819	0.11726	0.0787796	1.00311
Glyma.01G232400	Glyma01g44270	4-coumarate--CoA ligase 2	4CL2_SOYBN	0	AT1G65060.1	0	4-coumarate:CoA ligase 3	GO:0008152 GO:0009411 GO:0009698 GO:0009718 GO:0009744 GO:0009813 GO:0010224 GO:0010584	anthocyanin-containing compound biosynthetic process; "flavonoid biosynthetic process"; "metabolic process"; "phenylpropanoid metabolic process"; "pollen exine formation"; "response to UV"; "response to UV-B"; "response to sucrose stimulus"	GO:0003824 GO:0016207	4-coumarate-CoA ligase activity; "catalytic activity"	GO:0005575	cellular component	5.78141	4.91048	4.74829	3.9944	0.760157	-1.01334	-1.10717	-1.08887	NA
Glyma.01G232500	Glyma01g44281	Cellulase synthase 3 family protein	B9N113_POPTR	0	AT3G03050.1	0	cellulose synthase-like D3	GO:0000271 GO:0009409 GO:0009832 GO:0010583 GO:0030244	cellulose biosynthetic process; "plant-type cell wall biogenesis"; "polysaccharide biosynthetic process"; "response to cold"; "response to cyclopentenone"	GO:0016757 GO:0016759 GO:0051753	cellulose synthase activity; "man-n synthase activity"; "transferase activity, transferring glycosyl groups"	GO:0005768 GO:0005783 GO:0005794 GO:0005802 GO:0005886 GO:0016020	Golgi apparatus; "endoplasmic reticulum"; "endosome"; "membrane"; "plasma membrane"; "trans-Golgi network"	10.2098	7.82884	7.93157	5.46777	0.760157	-1.01334	-1.10717	-1.08887	-0.927841
Glyma.01G233600	Glyma01g44390	Interactor of constitutive active ROPs	G7K555_MEDTR	0	AT5G16730.1	0	Plant protein of unknown function (DUF827)	-	-	-	-	-	-	8.66387	7.79081	7.81525	6.4023	4.06999	4.57035	4.72279	4.59497	4.49387
Glyma.01G233700	Glyma01g44400	Nogo-B receptor	G7K548_MEDTR	5e-135	AT1G11755.1	2e-80	Undecaprenyl pyrophosphate synthetase family protein	GO:0006487 GO:0009414 GO:0009645 GO:0019408 GO:0030968	dolichol biosynthetic process; "endoplasmic reticulum unfolded protein response"; "protein N-linked glycosylation"; "response to low light intensity stimulus"; "response to water deprivation"	GO:0016765 GO:0045547	dehydrodolichyl diphosphate synthase activity; "transferase activity, transferring alkyl or aryl (other than methyl) groups"	-	-	7.92747	7.02288	7.16422	6.79286	5.08539	5.06527	5.19313	5.30872	5.50629
Glyma.01G234100	Glyma01g44440	Pentatricopeptide repeat-containing protein	D7M586_ARALL	0	AT5G13270.1	0	Pentatricopeptide repeat (PPR) superfamily protein	GO:0009451 GO:0016556	R- modification; "mR- modification"	-	-	GO:0009507	chloroplast	5.8523	4.86524	4.42196	3.60468	-1.35736	-1.01334	0.462664	0.511221	-0.927841
Glyma.01G234400	Glyma01g44471	Growth-regulating factor 4	GRF4_ORYSJ	2e-76	AT3G13960.1	2e-44	growth-regulating factor 5	GO:0006355 GO:0009737 GO:0009793 GO:0009845 GO:0009909 GO:0009965 GO:0010162 GO:0016570 GO:0048366 GO:0048449	embryo development ending in seed dormancy; "floral organ formation"; "histone modification"; "leaf development"; "leaf morphogenesis"; "regulation of flower development"; "regulation of transcription, D--dependent"; "response to abscisic acid stimulus"; "seed dormancy process"; "seed germi-tion"	GO:0005524 GO:0016818	ATP binding; "hydrolase activity, acting on acid anhydrides, in phosphorus-containing anhydrides"	GO:0005634	nucleus	7.71478	6.3223	6.2921	4.72001	1.24486	-0.000621929	-0.891919	-0.91204	0.00225974
Glyma.01G234600	Glyma01g44491	Zinc knuckle (CCHC-type) family protein	D7MNN1_ARALL	3e-36	AT5G43630.1	1e-58	zinc knuckle (CCHC-type) family protein	GO:0006352 GO:0006355 GO:0016570 GO:0040007	D--dependent transcription, initiation; "growth"; "histone modification"; "regulation of transcription, D--dependent"	GO:0003676 GO:0003677 GO:0008270	D- binding; "nucleic acid binding"; "zinc ion binding"	GO:0005634	nucleus	7.79113	9.03611	8.99484	8.80468	6.77534	6.86002	6.74018	6.73657	6.47571
Glyma.01G234800	Glyma01g44510	Nucleic acid binding protein	D7LGX9_ARALL	1e-31	AT2G34160.1	2e-34	Alba DNA/RNA-binding protein	GO:0008150 GO:0009062	biological process; "fatty acid catabolic process"	GO:0003676	nucleic acid binding	GO:0005634 GO:0005829	cytosol; "nucleus"	4.80129	2.90037	3.23581	0.0555561	3.30137	3.52891	3.09967	2.97947	3.22016
Glyma.01G235300	Glyma01g44570	Type I inositol-1,4,5-trisphosphate 5-phosphatase CVP2	G7K3S6_MEDTR	0	AT1G05470.1	0	DNAse I-like superfamily protein	GO:0009737 GO:0009855 GO:0009887 GO:0009944 GO:0010014 GO:0010051 GO:0010067 GO:0010305 GO:0010588 GO:0032957 GO:0046854 GO:0046855 GO:0048016 GO:0048439 GO:0048519	cotyledon vascular tissue pattern formation; "determi-tion of bilateral symmetry"; "flower morphogenesis"; "inositol phosphate-mediated sig-ling"; "inositol phosphate dephosphorylation"; "inositol trisphosphate metabolic process"; "leaf vascular tissue pattern formation"; "meristem initiation"; "negative regulation of biological process"; "organ morphogenesis"; "phosphatidylinositol phosphorylati…	GO:0016787 GO:0046030	hydrolase activity; "inositol trisphosphate phosphatase activity"	GO:0005737	cytoplasm	4.06875	3.54447	4.04876	2.78427	0.929377	1.63411	0.0047454	0.00190919	-1.07126
Glyma.01G235500	#N/A	-	-	-	-	-	-	-	-	-	-	-	-	-1.49729	-1.02355	NA	-1.52331	1.53488	1.87049	1.69798	1.78007	0.618643
Glyma.01G235900	Glyma01g44630	Protein RDM1	RDM1_ARATH	3e-59	AT3G22680.1	3e-62	RNA-DIRECTED DNA METHYLATION 1	GO:0006306 GO:0031047 GO:0044030 GO:0070918	D- methylation; "gene silencing by R-"; "production of small R- involved in gene silencing by R-"; "regulation of D- methylation"	GO:0003674 GO:0005515 GO:0043621	molecular function; "protein binding"; "protein self-association"	GO:0005634	nucleus	8.19912	6.43983	6.46905	5.20888	3.6488	4.42443	4.27045	4.23206	4.30867
Glyma.01G236000	Glyma01g44640	Pentatricopeptide repeat-containing protein	G7K3Q3_MEDTR	0	AT3G22690.2	1e-46	INVOLVED IN: photosystem II assembly, regulation of chlorophyll biosynthetic process, photosystem I assembly, thylakoid membrane organization, RNA modification; LOCATED IN: chloroplast; EXPRESSED IN: 13 plant structures; EXPRESSED DURING: LP.04 four leaves visible, 4 anthesis, petal differentiation and expansion stage, E expanded cotyledon stage, D bilateral stage; CONTAINS InterPro DOMAIN/s: Pen…	GO:0006979 GO:0015986 GO:0015991 GO:0015992 GO:0046034	ATP hydrolysis coupled proton transport; "ATP metabolic process"; "ATP synthesis coupled proton transport"; "proton transport"; "response to oxidative stress"	GO:0005507 GO:0005524 GO:0008270 GO:0016820 GO:0046933 GO:0046961 GO:0050897	ATP binding; "cobalt ion binding"; "copper ion binding"; "hydrolase activity, acting on acid anhydrides, catalyzing transmembrane movement of substances"; "proton-transporting ATP synthase activity, rotatio-l mechanism"; "proton-transporting ATPase activity, rotatio-l mechanism"; "zinc ion binding"	GO:0005618 GO:0005739 GO:0005753 GO:0016469 GO:0033178 GO:0045261	cell wall; "mitochondrial proton-transporting ATP synthase complex"; "mitochondrion"; "proton-transporting ATP synthase complex, catalytic core F(1)"; "proton-transporting two-sector ATPase complex"; "proton-transporting two-sector ATPase complex, catalytic domain"	1.31748	1.95027	0.629368	2.72834	2.80726	5.01052	5.98747	5.82358	5.81759
Glyma.01G236200	Glyma01g44660	-	-	-	AT1G63060.1	1e-32	unknown protein; FUNCTIONS IN: molecular_function unknown; INVOLVED IN: biological_process unknown; LOCATED IN: mitochondrion; EXPRESSED IN: petal, leaf whorl, male gametophyte, flower; EXPRESSED DURING: L mature pollen stage, M germinated pollen stage, 4 anthesis, petal differentiation and expansion stage; BEST Arabidopsis thaliana protein match is: unknown protein (TAIR:AT5G07330.1); Has 42 Bla…	GO:0008150	biological process	GO:0003674	molecular function	GO:0005739	mitochondrion	6.49006	3.86778	5.22831	1.9699	-0.639723	NA	0.462664	0.511221	NA
Glyma.01G236800	Glyma01g44730	Senescence-associated family protein	B9HUU5_POPTR	3e-71	AT3G22550.1	2e-43	Protein of unknown function (DUF581)	-	-	GO:0003674	molecular function	GO:0005634	nucleus	8.01413	4.47924	4.20811	1.06292	NA	-0.986998	-0.891919	-0.91204	-1.07126
Glyma.01G237200	Glyma01g44770	-	-	-	AT1G05430.1	4e-27	unknown protein; Has 31 Blast hits to 31 proteins in 9 species: Archae - 0; Bacteria - 0; Metazoa - 0; Fungi - 0; Plants - 31; Viruses - 0; Other Eukaryotes - 0 (source: NCBI BLink).	GO:0008150	biological process	GO:0003674	molecular function	GO:0005575	cellular component	7.75134	6.5931	6.25014	5.5518	4.18338	4.46863	4.18155	4.1004	4.39902
Glyma.01G237300	Glyma01g44780	Genomic DNA, chromosome 3, BAC clone:F16J14	Q9LJ93_ARATH	2e-34	AT4G14830.1	2e-38	unknown protein; BEST Arabidopsis thaliana protein match is: unknown protein (TAIR:AT3G22530.1); Has 77 Blast hits to 77 proteins in 12 species: Archae - 0; Bacteria - 0; Metazoa - 0; Fungi - 0; Plants - 77; Viruses - 0; Other Eukaryotes - 0 (source: NCBI BLink).	GO:0008150	biological process	GO:0003674 GO:0005515	molecular function; "protein binding"	GO:0005634	nucleus	0.0389396	0.610153	0.171962	3.76193	4.19701	3.88294	3.55304	3.66999	3.4588
Glyma.01G237900	Glyma01g44833	Cysteine synthase	Q8W1A0_SOYBN	2e-39	AT4G14880.4	3e-31	O-acetylserine (thiol) lyase (OAS-TL) isoform A1	GO:0006094 GO:0006096 GO:0006535 GO:0006816 GO:0006833 GO:0006972 GO:0007030 GO:0007568 GO:0008152 GO:0009266 GO:0009611 GO:0009651 GO:0009684 GO:0009805 GO:0009853 GO:0019344 GO:0019761 GO:0046686	Golgi organization; "aging"; "calcium ion transport"; "coumarin biosynthetic process"; "cysteine biosynthetic process"; "cysteine biosynthetic process from serine"; "gluconeogenesis"; "glucosinolate biosynthetic process"; "glycolysis"; "hyperosmotic response"; "indoleacetic acid biosynthetic process"; "metabolic process"; "photorespiration"; "response to cadmium ion"; "response to salt stress"; "…	GO:0003824 GO:0004124 GO:0005515 GO:0030170	catalytic activity; "cysteine synthase activity"; "protein binding"; "pyridoxal phosphate binding"	GO:0005634 GO:0005737 GO:0005774 GO:0005777 GO:0005829 GO:0005886 GO:0009507 GO:0009570 GO:0016020 GO:0048046	apoplast; "chloroplast"; "chloroplast stroma"; "cytoplasm"; "cytosol"; "membrane"; "nucleus"; "peroxisome"; "plasma membrane"; "vacuolar membrane"	7.75678	6.08955	5.96103	4.49549	3.42195	3.83418	3.5524	3.59137	4.01669
Glyma.01G238000	Glyma01g44850	Ferredoxin-3 chloroplastic-like protein	T2DNC3_PHAVU	9e-73	AT4G14890.1	6e-63	2Fe-2S ferredoxin-like superfamily protein	GO:0006098 GO:0006364 GO:0015995 GO:0019288 GO:0022900 GO:0045893	chlorophyll biosynthetic process; "electron transport chain"; "isopentenyl diphosphate biosynthetic process, mevalo-te-independent pathway"; "pentose-phosphate shunt"; "positive regulation of transcription, D--dependent"; "rR- processing"	GO:0009055 GO:0051536 GO:0051537	2 iron, 2 sulfur cluster binding; "electron carrier activity"; "iron-sulfur cluster binding"	GO:0009507	chloroplast	6.30639	6.88278	7.10313	6.63771	4.96393	3.57691	3.96919	4.07237	4.14276
Glyma.01G238800	Glyma01g44930	Hexose transporter	W0TSU6_ACAMN	0	AT5G26340.1	0	Major facilitator superfamily protein	GO:0009414 GO:0009651 GO:0009737 GO:0015749 GO:0016310 GO:0043090	amino acid import; "monosaccharide transport"; "phosphorylation"; "response to abscisic acid stimulus"; "response to salt stress"; "response to water deprivation"	GO:0005351 GO:0005358 GO:0009679 GO:0015144 GO:0015145	carbohydrate transmembrane transporter activity; "hexose:hydrogen symporter activity"; "high-affinity hydrogen:glucose symporter activity"; "monosaccharide transmembrane transporter activity"; "sugar:hydrogen symporter activity"	GO:0005737 GO:0005886 GO:0009506 GO:0016020	cytoplasm; "membrane"; "plasma membrane"; "plasmodesma"	7.18285	7.3881	7.86493	5.90865	4.93649	4.65648	4.45702	4.55389	4.32693
Glyma.01G239500	Glyma01g45000	2-hydroxyisoflavanone dehydratase	HIDM_GLYEC	5e-128	AT1G47480.1	5e-83	alpha/beta-Hydrolases superfamily protein	GO:0008152 GO:0048765	metabolic process; "root hair cell differentiation"	GO:0016787	hydrolase activity	GO:0005634	nucleus	11.3924	10.599	10.8136	9.44003	8.292	7.94777	8.17741	8.32082	8.0807
Glyma.01G239900	Glyma01g45050	-	-	-	AT3G06035.1	1e-71	Glycoprotein membrane precursor GPI-anchored	GO:0008150 GO:0010075	biological process; "regulation of meristem growth"	GO:0003674	molecular function	GO:0005886 GO:0031225	anchored to membrane; "plasma membrane"	7.43557	5.4493	5.42402	4.51202	4.34548	4.44699	4.26174	4.17965	4.09439
Glyma.01G240100	Glyma01g45070	HD-1A	I6ZZ25_GOSHI	0	AT4G21750.2	0	Homeobox-leucine zipper family protein / lipid-binding START domain-containing protein	GO:0006355 GO:0006473 GO:0009793 GO:0009913 GO:0010027 GO:0010075 GO:0010228 GO:0016226 GO:0048481 GO:0048825	cotyledon development; "embryo development ending in seed dormancy"; "epidermal cell differentiation"; "iron-sulfur cluster assembly"; "ovule development"; "protein acetylation"; "regulation of meristem growth"; "regulation of transcription, D--dependent"; "thylakoid membrane organization"; "vegetative to reproductive phase transition of meristem"	GO:0003677 GO:0003700 GO:0043565	D- binding; "sequence-specific D- binding"; "sequence-specific D- binding transcription factor activity"	GO:0005634	nucleus	5.45711	5.36936	5.39836	4.8765	2.66461	2.05225	2.56631	2.70243	1.8671
Glyma.01G240300	Glyma01g45110	Pectinesterase	I1JAV9_SOYBN	0	AT1G11580.1	0	methylesterase PCR A	GO:0042545 GO:0052541 GO:0052546	cell wall modification; "cell wall pectin metabolic process"; "plant-type cell wall cellulose metabolic process"	GO:0004857 GO:0030599	enzyme inhibitor activity; "pectinesterase activity"	GO:0005618 GO:0005774 GO:0005829 GO:0009505	cell wall; "cytosol"; "plant-type cell wall"; "vacuolar membrane"	5.34703	6.31075	5.07367	5.59819	2.95839	2.9154	2.81915	2.80221	2.56198
Glyma.01G240400	#N/A	Craniofacial development protein	G8A282_MEDTR	3e-162	-	-	-	-	-	-	-	-	-	3.07632	3.52534	3.22978	3.76736	3.3886	1.88057	-1.10717	-1.08887	0.0814936
Glyma.01G240700	Glyma01g45151	Trimeric LpxA-like	A2Q2M3_MEDTR	4e-138	AT4G21220.1	4e-122	Trimeric LpxA-like enzymes superfamily protein	GO:2001289	lipid X metabolic process	GO:0016740 GO:0043764	UDP-3-O-[3-hydroxymyristoyl] glucosamine N-acyltransferase activity; "transferase activity"	GO:0005737 GO:0005739	cytoplasm; "mitochondrion"	5.35964	4.26106	3.54866	2.61428	0.617159	2.15212	2.19913	2.16904	1.50838
Glyma.01G240800	Glyma01g45160	Cysteine-rich receptor-like protein kinase	G7K105_MEDTR	0	AT4G23180.1	0	cysteine-rich RLK (RECEPTOR-like protein kinase) 10	GO:0006468 GO:0006995	cellular response to nitrogen starvation; "protein phosphorylation"	GO:0004672 GO:0004674 GO:0004713 GO:0005524 GO:0016301 GO:0016772	ATP binding; "ki-se activity"; "protein ki-se activity"; "protein serine/threonine ki-se activity"; "protein tyrosine ki-se activity"; "transferase activity, transferring phosphorus-containing groups"	GO:0005886	plasma membrane	0.850753	0.532757	0.498864	-1.52331	NA	NA	-1.10717	-1.08887	NA
Glyma.01G241200	Glyma01g45200	-	-	-	AT1G10020.1	1e-122	Protein of unknown function (DUF1005)	GO:0008150	biological process	GO:0003674	molecular function	GO:0005634	nucleus	9.6508	9.69703	9.93238	8.42367	7.08186	7.07689	7.09578	7.31866	7.38028
Glyma.01G241400	Glyma01g45230	SHW1 protein	Q8LGA9_ARATH	3e-22	AT4G33780.1	3e-47	FUNCTIONS IN: molecular_function unknown; INVOLVED IN: biological_process unknown; LOCATED IN: chloroplast; EXPRESSED IN: 24 plant structures; EXPRESSED DURING: 15 growth stages; BEST Arabidopsis thaliana protein match is: short hypocotyl in white light1 (TAIR:AT1G69935.1); Has 40 Blast hits to 40 proteins in 10 species: Archae - 0; Bacteria - 0; Metazoa - 0; Fungi - 0; Plants - 40; Viruses - 0; …	GO:0008150	biological process	GO:0003674	molecular function	GO:0009507	chloroplast	5.71669	7.43046	7.16914	7.51827	7.3594	8.3531	8.88985	8.75673	8.71941
Glyma.01G241500	Glyma01g45241	Sterol regulatory element-binding protein site 2 protease	E5GBH3_CUCME	0	AT1G17870.1	0	ethylene-dependent gravitropism-deficient and yellow-green-like 3	GO:0006457 GO:0009408 GO:0009644 GO:0042542	protein folding; "response to heat"; "response to high light intensity"; "response to hydrogen peroxide"	-	-	GO:0005739	mitochondrion	9.03516	12.2628	12.199	11.8463	10.3382	10.71	11.6564	11.5896	11.5567
Glyma.01G242100	Glyma01g45310	-	-	-	AT4G33800.1	3e-24	unknown protein; Has 30201 Blast hits to 17322 proteins in 780 species: Archae - 12; Bacteria - 1396; Metazoa - 17338; Fungi - 3422; Plants - 5037; Viruses - 0; Other Eukaryotes - 2996 (source: NCBI BLink).	GO:0008150	biological process	GO:0003674	molecular function	GO:0005634	nucleus	5.49732	2.808	2.54863	-1.52331	-1.35736	1.28297	1.1338	1.06224	0.90452
Glyma.01G242200	Glyma01g45320	Adhesive/proline-rich protein homolog	Q8L8M2_ARATH	5e-12	AT2G32190.1	7e-09	unknown protein; BEST Arabidopsis thaliana protein match is: unknown protein (TAIR:AT2G32210.1); Has 218 Blast hits to 218 proteins in 24 species: Archae - 0; Bacteria - 0; Metazoa - 0; Fungi - 16; Plants - 202; Viruses - 0; Other Eukaryotes - 0 (source: NCBI BLink).	GO:0008150 GO:0010200	biological process; "response to chitin"	GO:0003674	molecular function	-	-	6.44495	5.42844	5.43307	4.74729	3.54837	3.69191	3.71805	3.68948	3.90022
Glyma.01G242500	#N/A	Endo-1 4-beta-xylanase	G7IEV8_MEDTR	3e-49	AT3G19650.1	7e-20	cyclin-related	GO:0008150	biological process	GO:0003674	molecular function	GO:0005634	nucleus	7.53123	6.28997	6.04095	5.64577	4.05444	3.80924	3.67052	3.70674	3.75365
Glyma.01G242600	#N/A	Ribosomal RNA large subunit methyltransferase N	G7K0W5_MEDTR	3e-72	AT3G19630.1	4e-63	Radical SAM superfamily protein	GO:0000278 GO:0006396	R- processing; "mitotic cell cycle"	GO:0003824 GO:0008173 GO:0051536	R- methyltransferase activity; "catalytic activity"; "iron-sulfur cluster binding"	GO:0005737	cytoplasm	1.40925	0.884272	0.372821	-1.52331	NA	-0.986998	0.0047454	0.00190919	-1.07126
Glyma.01G242800	Glyma01g45380	Vacuolar-sorting receptor 1	VSR1_PEA	0	AT2G14740.2	0	vaculolar sorting receptor 3	GO:0006623 GO:0006886	intracellular protein transport; "protein targeting to vacuole"	GO:0005509	calcium ion binding	GO:0005768 GO:0005794 GO:0005802 GO:0005887 GO:0016020 GO:0017119	Golgi apparatus; "Golgi transport complex"; "endosome"; "integral to plasma membrane"; "membrane"; "trans-Golgi network"	10.9315	9.60685	9.1946	8.44533	7.25005	7.67739	7.50011	7.85986	7.79842
Glyma.01G243000	Glyma01g45400	Histone deacetylase	G7K0X4_MEDTR	5e-57	AT2G14830.2	2e-54	Regulator of Vps4 activity in the MVB pathway protein	GO:0008150	biological process	GO:0008270	zinc ion binding	GO:0005634 GO:0005737	cytoplasm; "nucleus"	7.21038	6.30143	6.27133	5.1044	2.49103	2.20885	1.07372	1.02918	0.497073
Glyma.01G243100	Glyma01g45410	Neutral amino acid transport protein	G7K0X5_MEDTR	0	AT3G19553.1	0	Amino acid permease family protein	GO:0015846 GO:0015996	chlorophyll catabolic process; "polyamine transport"	GO:0015203 GO:0015326	cationic amino acid transmembrane transporter activity; "polyamine transmembrane transporter activity"	GO:0005886 GO:0016020	membrane; "plasma membrane"	6.48336	6.43265	5.93203	5.94718	4.45791	3.83418	3.21171	3.15646	3.33079
Glyma.01G243400	Glyma01g45440	-	-	-	-	-	-	-	-	-	-	-	-	7.20287	3.45014	3.32938	NA	NA	NA	NA	NA	NA
Glyma.01G243700	#N/A	-	-	-	-	-	-	-	-	-	-	-	-	0.850753	0.532757	1.67547	-1.52331	-1.35736	-1.01334	NA	NA	NA
Glyma.01G243900	Glyma01g45490	UMUC-like DNA repair family protein	B9HS71_POPTR	0	AT5G44750.1	0	DNA-directed DNA polymerases	GO:0006281 GO:0006974 GO:0007155 GO:0010090 GO:0010224 GO:0010228 GO:0016926 GO:0045010 GO:0050665	D- repair; "actin nucleation"; "cell adhesion"; "hydrogen peroxide biosynthetic process"; "protein desumoylation"; "response to D- damage stimulus"; "response to UV-B"; "trichome morphogenesis"; "vegetative to reproductive phase transition of meristem"	GO:0000287 GO:0003684 GO:0003887 GO:0016779	D--directed D- polymerase activity; "damaged D- binding"; "magnesium ion binding"; "nucleotidyltransferase activity"	GO:0005622 GO:0005634	intracellular; "nucleus"	7.52186	7.34701	6.92452	6.85019	5.38642	5.30641	5.09721	5.27496	4.80689
Glyma.01G244100	Glyma01g45510	Plant basic secretory family protein	B9GHT3_POPTR	1e-56	AT2G15220.1	3e-54	Plant basic secretory protein (BSP) family protein	GO:0006952	defense response	-	-	GO:0005576	extracellular region	0.850753	0.532757	0.498864	-1.52331	NA	NA	NA	NA	NA
Glyma.01G244500	Glyma01g45560	C2 domain-containing family protein	A9PEZ2_POPTR	1e-84	AT4G34150.1	1e-72	Calcium-dependent lipid-binding (CaLB domain) family protein	GO:0006612 GO:0006944 GO:0009409 GO:0009611 GO:0009612 GO:0009646 GO:0010200 GO:0010363 GO:0030968 GO:0043069 GO:0052542	cellular membrane fusion; "defense response by callose deposition"; "endoplasmic reticulum unfolded protein response"; "negative regulation of programmed cell death"; "protein targeting to membrane"; "regulation of plant-type hypersensitive response"; "response to absence of light"; "response to chitin"; "response to cold"; "response to mechanical stimulus"; "response to wounding"	-	-	GO:0005829 GO:0009506	cytosol; "plasmodesma"	10.3499	7.58469	7.66047	5.53394	3.99953	4.17977	4.6252	4.51138	4.31833
Glyma.01G244800	Glyma01g45623	B3 domain-containing protein	G8A1E2_MEDTR	1e-83	AT3G19184.1	1e-35	AP2/B3-like transcriptional factor family protein	GO:0006355	regulation of transcription, D--dependent	GO:0003677	D- binding	GO:0005634	nucleus	10.246	5.85379	6.12979	1.275	NA	-0.00299611	0.11726	0.0787796	1.8671
Glyma.01G245000	Glyma01g45655	-	-	-	-	-	-	-	-	-	-	-	-	2.168	2.55336	2.29146	3.29079	3.02959	4.64346	5.1732	5.16241	4.98927
Glyma.01G245300	Glyma01g45680	Pentatricopeptide repeat-containing protein	G7KV78_MEDTR	0	AT4G33170.1	6e-121	Tetratricopeptide repeat (TPR)-like superfamily protein	-	-	-	-	GO:0005739	mitochondrion	4.00208	5.00539	4.31509	4.96289	2.17909	2.12397	2.36934	2.32006	2.12536
Glyma.01G245500	Glyma01g45700	mRNA, clone: RTFL01-03-E08	E4MVT9_THEHA	0	AT1G21070.1	0	Nucleotide-sugar transporter family protein	GO:0006863	purine nucleobase transport	-	-	GO:0005794 GO:0005886 GO:0016020	Golgi apparatus; "membrane"; "plasma membrane"	8.93471	8.00886	7.94132	6.9853	5.3926	5.72352	5.58901	5.34153	5.72544
Glyma.02G000500	Glyma02g00260	Auxin-induced protein	K7K5Q4_SOYBN	2e-138	AT5G43700.1	4e-79	AUX/IAA transcriptional regulator family protein	GO:0006355 GO:0006417 GO:0007020 GO:0009733 GO:0009736 GO:0010583	cytokinin mediated sig-ling pathway; "microtubule nucleation"; "regulation of transcription, D--dependent"; "regulation of translation"; "response to auxin stimulus"; "response to cyclopentenone"	GO:0003677 GO:0003700 GO:0046983	D- binding; "protein dimerization activity"; "sequence-specific D- binding transcription factor activity"	GO:0005622 GO:0005634	intracellular; "nucleus"	8.75326	7.49707	7.43705	6.33014	1.29575	1.96871	2.19913	2.16904	1.50838
Glyma.02G000800	Glyma02g00290	Basic helix-loop-helix family protein	B9HKE4_POPTR	2e-36	AT5G43650.1	2e-32	basic helix-loop-helix (bHLH) DNA-binding superfamily protein	GO:0006355	regulation of transcription, D--dependent	GO:0003677 GO:0003700	D- binding; "sequence-specific D- binding transcription factor activity"	GO:0005634	nucleus	8.08094	5.10824	5.5871	1.98373	NA	NA	NA	NA	-0.927841
Glyma.02G001100	Glyma02g00340	Benzoyl coenzyme A: benzyl alcohol benzoyl transferase	Q6E593_PETHY	0	AT5G17540.1	0	HXXXD-type acyl-transferase family protein	-	-	GO:0016747	transferase activity, transferring acyl groups other than amino-acyl groups	GO:0005737	cytoplasm	7.69318	5.07496	4.24724	2.46843	-1.35736	-1.01334	-0.114753	-0.081287	-0.927841
Glyma.02G001400	Glyma02g00371	E3 ubiquitin ligase	W0TQK0_ACAMN	0	AT1G76390.2	9e-84	ARM repeat superfamily protein	GO:0006457 GO:0009408 GO:0009644 GO:0042542	protein folding; "response to heat"; "response to high light intensity"; "response to hydrogen peroxide"	GO:0003674	molecular function	GO:0005783 GO:0009507	chloroplast; "endoplasmic reticulum"	4.39962	5.73123	5.92288	5.46072	7.07177	9.63316	10.7471	11.161	10.8152
Glyma.02G001700	Glyma02g00400	-	-	-	AT3G22970.1	3e-110	Protein of unknown function (DUF506) _x0001_	GO:0008150	biological process	GO:0003674	molecular function	GO:0005634 GO:0009507	chloroplast; "nucleus"	6.58087	5.75447	5.6376	4.14045	0.760157	0.97597	0.710769	0.655196	0.951408
Glyma.02G001800	Glyma02g00415	-	-	-	-	-	-	-	-	-	-	-	-	10.4912	10.6613	10.6749	10.1546	8.85587	8.24293	8.01939	8.11258	8.03021
Glyma.02G002100	Glyma02g00450	Calmodulin	Q43447_SOYBN	6e-97	AT4G14640.1	5e-85	calmodulin 8	GO:0005513 GO:0009612 GO:0019722 GO:0030048 GO:0051645 GO:0051646 GO:0060151	Golgi localization; "actin filament-based movement"; "calcium-mediated sig-ling"; "detection of calcium ion"; "mitochondrion localization"; "peroxisome localization"; "response to mechanical stimulus"	GO:0005509	calcium ion binding	GO:0005634	nucleus	0.850753	0.532757	1.95222	-1.52331	NA	NA	NA	NA	NA
Glyma.02G002500	Glyma02g00510	Argonaute family protein	B9HKB5_POPTR	0	AT5G43810.2	0	Stabilizer of iron transporter SufD / Polynucleotidyl transferase	GO:0006346 GO:0007267 GO:0009616 GO:0009855 GO:0009887 GO:0009944 GO:0010014 GO:0010050 GO:0010051 GO:0010072 GO:0010073 GO:0010267 GO:0010586 GO:0016246 GO:0035019 GO:0035196 GO:0048439 GO:0048519	R- interference; "cell-cell sig-ling"; "determi-tion of bilateral symmetry"; "flower morphogenesis"; "meristem initiation"; "meristem mainte-nce"; "methylation-dependent chromatin silencing"; "miR- metabolic process"; "negative regulation of biological process"; "organ morphogenesis"; "polarity specification of adaxial/abaxial axis"; "primary shoot apical meristem specification"; "production of m…	GO:0003676 GO:0003743 GO:0035198	miR- binding; "nucleic acid binding"; "translation initiation factor activity"	GO:0005737	cytoplasm	7.67402	7.52597	7.52925	6.67722	5.64709	6.12581	5.56941	5.1909	4.98656
Glyma.02G002900	Glyma02g00550	Probable methyltransferase PMT8	PMT8_ARATH	0	AT1G04430.2	0	S-adenosyl-L-methionine-dependent methyltransferases superfamily protein	GO:0000271 GO:0009825 GO:0009932 GO:0010817 GO:0043481 GO:0048767 GO:0071555	anthocyanin accumulation in tissues in response to UV light; "cell tip growth"; "cell wall organization"; "multidimensio-l cell growth"; "polysaccharide biosynthetic process"; "regulation of hormone levels"; "root hair elongation"	GO:0008168	methyltransferase activity	GO:0005768 GO:0005774 GO:0005794 GO:0005802	Golgi apparatus; "endosome"; "trans-Golgi network"; "vacuolar membrane"	8.26047	5.14071	4.83061	1.86529	1.1831	2.05225	1.00604	1.00061	0.55635
Glyma.02G004000	Glyma02g00670	Pleckstrin homology domain-containing family A member	G7IR36_MEDTR	1e-129	AT2G33470.2	6e-115	glycolipid transfer protein 1	GO:0006816 GO:0007030 GO:0009651 GO:0046836	Golgi organization; "calcium ion transport"; "glycolipid transport"; "response to salt stress"	GO:0017089 GO:0051861	glycolipid binding; "glycolipid transporter activity"	GO:0005737 GO:0005829 GO:0005886	cytoplasm; "cytosol"; "plasma membrane"	7.78069	6.59121	6.46882	5.3931	3.97402	4.53072	4.65997	4.4931	4.10153
Glyma.02G004600	Glyma02g00710	Calmodulin-binding family protein	B9HUR6_POPTR	8e-150	AT4G14750.1	2e-88	IQ-domain 19	-	-	GO:0005516	calmodulin binding	GO:0005634	nucleus	2.20805	1.33317	1.27462	-1.52331	-1.35736	-1.01334	-1.10717	-1.08887	NA
Glyma.02G005200	Glyma02g00780	Aldo-keto reductase	G7I4M8_MEDTR	0	AT1G04420.1	0	NAD(P)-linked oxidoreductase superfamily protein	GO:0019288	isopentenyl diphosphate biosynthetic process, mevalo-te-independent pathway	GO:0004033	aldo-keto reductase (-DP) activity	GO:0009507 GO:0009570 GO:0009941	chloroplast; "chloroplast envelope"; "chloroplast stroma"	7.41114	7.1588	6.35807	6.65455	5.53611	5.50168	4.93626	5.03346	4.7174
Glyma.02G005300	Glyma02g00790	Serine/threonine protein kinase Nek9	G7I4N4_MEDTR	0	AT3G23270.1	0	Regulator of chromosome condensation (RCC1) family with FYVE zinc finger domain	GO:0007165 GO:0009827 GO:0009860	plant-type cell wall modification; "pollen tube growth"; "sig-l transduction"	GO:0003682 GO:0005543 GO:0008536 GO:0035091 GO:0046872	Ran GTPase binding; "chromatin binding"; "metal ion binding"; "phosphatidylinositol binding"; "phospholipid binding"	GO:0005737	cytoplasm	-0.53121	0.0103776	-0.860516	-0.52691	1.82944	2.58034	1.92794	1.82996	2.29578
Glyma.02G005500	Glyma02g00810	Malate dehydrogenase	Q6RIB6_SOYBN	0	AT1G04410.1	0	Lactate/malate dehydrogenase family protein	GO:0005975 GO:0006094 GO:0006096 GO:0006108 GO:0006833 GO:0006972 GO:0007030 GO:0009266 GO:0009651 GO:0010043 GO:0044262 GO:0046686 GO:0055114	Golgi organization; "carbohydrate metabolic process"; "cellular carbohydrate metabolic process"; "gluconeogenesis"; "glycolysis"; "hyperosmotic response"; "malate metabolic process"; "oxidation-reduction process"; "response to cadmium ion"; "response to salt stress"; "response to temperature stimulus"; "response to zinc ion"; "water transport"	GO:0000166 GO:0003824 GO:0016491 GO:0016615 GO:0016616 GO:0030060	L-malate dehydroge-se activity; "catalytic activity"; "malate dehydroge-se activity"; "nucleotide binding"; "oxidoreductase activity"; "oxidoreductase activity, acting on the CH-OH group of donors, -D or -DP as acceptor"	GO:0005634 GO:0005737 GO:0005773 GO:0005774 GO:0005886 GO:0009506 GO:0009507 GO:0009570 GO:0016020 GO:0048046	apoplast; "chloroplast"; "chloroplast stroma"; "cytoplasm"; "membrane"; "nucleus"; "plasma membrane"; "plasmodesma"; "vacuolar membrane"; "vacuole"	11.927	9.29972	9.00898	7.05762	5.41611	5.7434	5.84271	5.68818	5.30757
Glyma.02G005600	Glyma02g00820	GmMYB29A2 protein	Q9XIU9_SOYBN	0	AT3G23250.1	3e-79	myb domain protein 15	GO:0002679 GO:0006355 GO:0007165 GO:0009414 GO:0009611 GO:0009651 GO:0009695 GO:0009723 GO:0009733 GO:0009737 GO:0009738 GO:0009753 GO:0009867 GO:0009873 GO:0010200 GO:0035556 GO:0042538 GO:0046686 GO:0052542	abscisic acid mediated sig-ling pathway; "defense response by callose deposition"; "ethylene mediated sig-ling pathway"; "hyperosmotic salinity response"; "intracellular sig-l transduction"; "jasmonic acid biosynthetic process"; "jasmonic acid mediated sig-ling pathway"; "regulation of transcription, D--dependent"; "respiratory burst involved in defense response"; "response to abscisic acid stimu…	GO:0003677 GO:0003700	D- binding; "sequence-specific D- binding transcription factor activity"	GO:0005634	nucleus	4.71444	2.86489	2.26876	0.0555561	NA	NA	NA	NA	NA
Glyma.02G005700	Glyma02g00830	Cryptochrome2	D0FZ20_SOYBN	0	AT1G04400.1	0	cryptochrome 2	GO:0006281 GO:0006325 GO:0006338 GO:0009414 GO:0009416 GO:0009637 GO:0009638 GO:0009909 GO:0009911 GO:0010075 GO:0010118 GO:0010617 GO:0042744	D- repair; "chromatin organization"; "chromatin remodeling"; "circadian regulation of calcium ion oscillation"; "hydrogen peroxide catabolic process"; "phototropism"; "positive regulation of flower development"; "regulation of flower development"; "regulation of meristem growth"; "response to blue light"; "response to light stimulus"; "response to water deprivation"; "stomatal movement"	GO:0005515 GO:0009882 GO:0042802 GO:0042803	blue light photoreceptor activity; "identical protein binding"; "protein binding"; "protein homodimerization activity"	GO:0005634 GO:0005773	nucleus; "vacuole"	8.50415	6.69692	6.59202	5.16043	3.26506	3.09516	3.15562	3.16905	2.6648
Glyma.02G006000	Glyma02g00850	Serine/threonine protein phosphatase	G7I5D1_MEDTR	0	AT2G39840.1	0	type one serine/threonine protein phosphatase 4	GO:0006470 GO:0006499	N-termi-l protein myristoylation; "protein dephosphorylation"	GO:0004722 GO:0016787	hydrolase activity; "protein serine/threonine phosphatase activity"	GO:0000164 GO:0005737	cytoplasm; "protein phosphatase type 1 complex"	2.26665	1.60759	1.27462	0.5	0.0476376	-1.01334	-0.114753	-0.081287	-0.927841
Glyma.02G006100	Glyma02g00860	-	-	-	-	-	-	-	-	-	-	-	-	7.36636	6.71719	4.66301	0.539935	NA	NA	NA	NA	NA
Glyma.02G006600	Glyma02g00930	Pectin acetylesterase	G7KVG3_MEDTR	0	AT5G26670.1	0	Pectinacetylesterase family protein	-	-	GO:0004091	carboxylesterase activity	GO:0005576	extracellular region	7.34773	3.8668	3.64382	0.5	0.617159	2.15212	2.33154	2.31897	1.75551
Glyma.02G006700	Glyma02g00940	OSJNBa0004B13.24 protein	Q9AQY8_ORYSJ	7e-13	AT4G01670.1	2e-24	unknown protein; BEST Arabidopsis thaliana protein match is: unknown protein (TAIR:AT3G62070.1); Has 141 Blast hits to 139 proteins in 15 species: Archae - 0; Bacteria - 0; Metazoa - 0; Fungi - 0; Plants - 138; Viruses - 0; Other Eukaryotes - 3 (source: NCBI BLink).	GO:0008150	biological process	GO:0003674	molecular function	GO:0005634	nucleus	2.45457	1.23619	1.12782	-0.47091	NA	NA	NA	NA	NA
Glyma.02G007100	Glyma02g00991	ASYNAPTIC 3	Q0WR66_ARATH	2e-86	AT2G46980.2	3e-89	unknown protein; Has 3995 Blast hits to 3325 proteins in 374 species: Archae - 19; Bacteria - 205; Metazoa - 2201; Fungi - 364; Plants - 149; Viruses - 22; Other Eukaryotes - 1035 (source: NCBI BLink).	GO:0007126	meiosis	GO:0003674	molecular function	GO:0005634 GO:0005694 GO:0005730	chromosome; "nucleolus"; "nucleus"	5.28283	2.71521	2.45323	0.0969565	-0.362116	2.09707	2.40616	2.3216	2.41992
Glyma.02G007400	Glyma02g01020	Class II chitinase	D8V5S2_ARAHY	3e-163	AT1G02360.1	8e-147	Chitinase family protein	GO:0002679 GO:0005975 GO:0006865 GO:0010167 GO:0010200 GO:0015706 GO:0016998 GO:0050832	amino acid transport; "carbohydrate metabolic process"; "cell wall macromolecule catabolic process"; "defense response to fungus"; "nitrate transport"; "respiratory burst involved in defense response"; "response to chitin"; "response to nitrate"	GO:0004568	chiti-se activity	GO:0005576	extracellular region	7.37599	4.03374	4.7319	0.0555561	NA	NA	NA	NA	NA
Glyma.02G007600	Glyma02g01050	Polygalacturonase	G7KUM8_MEDTR	0	AT3G62110.1	0	Pectin lyase-like superfamily protein	GO:0005975 GO:0010583	carbohydrate metabolic process; "response to cyclopentenone"	GO:0004650	polygalacturo-se activity	GO:0005576 GO:0005773	extracellular region; "vacuole"	6.71223	4.37828	4.00452	2.00608	-1.35736	-1.01334	-0.114753	-0.081287	NA
Glyma.02G008100	Glyma02g01110	-	-	-	AT2G47010.2	0	unknown protein; FUNCTIONS IN: molecular_function unknown; INVOLVED IN: biological_process unknown; LOCATED IN: endomembrane system; EXPRESSED IN: 17 plant structures; EXPRESSED DURING: 10 growth stages; BEST Arabidopsis thaliana protein match is: unknown protein (TAIR:AT1G17030.1); Has 72 Blast hits to 72 proteins in 13 species: Archae - 0; Bacteria - 0; Metazoa - 0; Fungi - 0; Plants - 71; Viru…	GO:0008150	biological process	GO:0003674	molecular function	-	-	4.48173	2.59417	2.13623	-0.52691	-1.35736	-1.01334	NA	NA	NA
Glyma.02G008500	Glyma02g01150	Serine/threonine protein kinase	C6TDV2_SOYBN	0	AT3G62220.1	0	Protein kinase superfamily protein	GO:0006468	protein phosphorylation	GO:0004672 GO:0004674 GO:0005524 GO:0016301 GO:0016772	ATP binding; "ki-se activity"; "protein ki-se activity"; "protein serine/threonine ki-se activity"; "transferase activity, transferring phosphorus-containing groups"	GO:0005737	cytoplasm	10.6648	7.93458	8.16315	5.93797	5.42871	5.95421	5.31183	5.35269	5.04915
Glyma.02G008900	Glyma02g01190	Peroxidase	G7IBT2_MEDTR	5e-163	AT3G21770.1	-	Peroxidase superfamily protein	-	-	-	-	-	-	0.0389396	0.610153	-0.860516	1.70234	3.13553	3.6411	4.19027	4.27074	3.73404
Glyma.02G009300	Glyma02g01230	Polygalacturonase	G7ICS4_MEDTR	0	AT1G02460.1	0	Pectin lyase-like superfamily protein	GO:0005975	carbohydrate metabolic process	GO:0004650	polygalacturo-se activity	GO:0005576	extracellular region	0.0389396	0.610153	NA	1.70234	NA	-0.986998	-0.891919	-0.91204	-1.07126
Glyma.02G009400	Glyma02g01240	NPR1/NIM1-interacting protein 1	B9GSX8_POPTR	8e-06	-	-	-	-	-	-	-	-	-	7.06061	4.58979	4.3919	2.71936	0.929377	1.84561	0.11726	0.0787796	-0.0798389
Glyma.02G009600	Glyma02g01260	ADP-ribosylation factor-like protein	G7KTP7_MEDTR	4e-130	AT5G14670.1	3e-131	ADP-ribosylation factor A1B	GO:0006499 GO:0007264	N-termi-l protein myristoylation; "small GTPase mediated sig-l transduction"	GO:0005525 GO:0016004	GTP binding; "phospholipase activator activity"	GO:0005622 GO:0005794	Golgi apparatus; "intracellular"	10.8565	7.31192	7.19562	3.68985	1.24486	1.73888	2.59569	2.58089	1.93503
Glyma.02G010600	Glyma02g01400	Probable glycerol-3-phosphate acyltransferase 3	GPAT3_ARATH	0	AT4G01950.1	0	glycerol-3-phosphate acyltransferase 3	GO:0006655 GO:0008152	metabolic process; "phosphatidylglycerol biosynthetic process"	GO:0016746	transferase activity, transferring acyl groups	GO:0005739	mitochondrion	0.850753	0.532757	-0.182774	0.0969565	-1.35736	1.28297	2.15869	2.16598	1.79287
Glyma.02G011300	Glyma02g01470	-	-	-	AT4G01995.1	3e-99	unknown protein; BEST Arabidopsis thaliana protein match is: unknown protein (TAIR:AT1G64680.1); Has 30201 Blast hits to 17322 proteins in 780 species: Archae - 12; Bacteria - 1396; Metazoa - 17338; Fungi - 3422; Plants - 5037; Viruses - 0; Other Eukaryotes - 2996 (source: NCBI BLink).	GO:0008150	biological process	GO:0003674	molecular function	GO:0009507	chloroplast	6.5924	4.78909	4.9735	3.50213	3.26335	3.81783	3.60046	3.73079	4.05187
Glyma.02G011400	Glyma02g01480	Protein kinase 2B	G7ICW7_MEDTR	0	AT4G02010.1	0	Protein kinase superfamily protein	GO:0006468	protein phosphorylation	GO:0004672 GO:0004674 GO:0005524 GO:0016301 GO:0016772	ATP binding; "ki-se activity"; "protein ki-se activity"; "protein serine/threonine ki-se activity"; "transferase activity, transferring phosphorus-containing groups"	GO:0005886	plasma membrane	8.15086	5.47822	5.35668	3.07852	0.503705	1.76354	1.69272	1.61149	1.96958
Glyma.02G011700	Glyma02g01505	-	-	-	-	-	-	-	-	-	-	-	-	3.10263	2.63151	1.93113	1.80097	0.0476376	0.574819	0.11726	0.0787796	0.55635
Glyma.02G011900	Glyma02g01520	-	-	-	AT2G47360.1	5e-53	unknown protein; BEST Arabidopsis thaliana protein match is: unknown protein (TAIR:AT1G02570.1); Has 58 Blast hits to 55 proteins in 6 species: Archae - 0; Bacteria - 0; Metazoa - 0; Fungi - 0; Plants - 58; Viruses - 0; Other Eukaryotes - 0 (source: NCBI BLink).	GO:0008150	biological process	GO:0003674	molecular function	GO:0005739	mitochondrion	3.13093	3.2728	2.75349	2.21175	NA	-0.986998	-0.891919	-0.91204	-1.07126
Glyma.02G012300	Glyma02g01560	-	-	-	AT2G16760.1	6e-143	Calcium-dependent phosphotriesterase superfamily protein	-	-	GO:0003674	molecular function	GO:0005576 GO:0005783	endoplasmic reticulum; "extracellular region"	8.17316	5.61696	5.85912	3.7579	1.0549	1.76354	1.46325	1.37665	2.1584
Glyma.02G012600	Glyma02g01590	Lectin	LEC_SOYBN	0	AT5G65600.1	3e-22	Concanavalin A-like lectin protein kinase family protein	GO:0006468 GO:0009723	protein phosphorylation; "response to ethylene stimulus"	GO:0004672 GO:0004674 GO:0005524 GO:0016301 GO:0016772	ATP binding; "ki-se activity"; "protein ki-se activity"; "protein serine/threonine ki-se activity"; "transferase activity, transferring phosphorus-containing groups"	GO:0005886	plasma membrane	18.8521	15.2557	15.3341	12.2466	10.7259	11.1359	11.6717	11.6543	11.2764
Glyma.02G012800	Glyma02g01610	Fat-free-like protein	G7IDQ8_MEDTR	0	AT4G02030.1	0	Vps51/Vps67 family (components of vesicular transport) protein	GO:0008150 GO:0030244 GO:0042732 GO:0048193	D-xylose metabolic process; "Golgi vesicle transport"; "biological process"; "cellulose biosynthetic process"	GO:0003674	molecular function	GO:0005794 GO:0005829	Golgi apparatus; "cytosol"	8.53429	6.67487	6.50403	4.86184	3.84188	4.40588	4.747	4.7118	4.03663
Glyma.02G013100	Glyma02g01640	Universal stress protein A-like protein	G7IDR7_MEDTR	2e-78	AT3G62550.1	1e-55	Adenine nucleotide alpha hydrolases-like superfamily protein	GO:0002238	response to molecule of fungal origin	GO:0003674	molecular function	GO:0005634 GO:0005773	nucleus; "vacuole"	5.34394	4.92732	4.18592	3.4363	0.0476376	-1.01334	-0.114753	-0.081287	NA
Glyma.02G013300	Glyma02g01660	Beta xylosidase	G7IDS0_MEDTR	0	AT1G02640.1	0	beta-xylosidase 2	GO:0005975 GO:0046685	carbohydrate metabolic process; "response to arsenic-containing substance"	GO:0004553	hydrolase activity, hydrolyzing O-glycosyl compounds	GO:0005576 GO:0009505	extracellular region; "plant-type cell wall"	1.29401	2.52501	NA	2.15039	-1.35736	-1.01334	-1.10717	-1.08887	-0.927841
Glyma.02G013400	#N/A	DNAJ heat shock N-terminal domain-containing family protein	B9GSH4_POPTR	9e-80	AT4G02100.1	1e-78	Heat shock protein DnaJ with tetratricopeptide repeat	GO:0006457	protein folding	GO:0031072	heat shock protein binding	GO:0005634	nucleus	2.33146	1.84131	0.939277	0.0555561	-1.35736	0.574819	0.11726	0.0787796	0.55635
Glyma.02G013500	Glyma02g01680	BRCT domain-containing protein	G7IDS4_MEDTR	0	AT4G02110.1	6e-115	transcription coactivators	-	-	GO:0003713	transcription coactivator activity	GO:0005622 GO:0005737	cytoplasm; "intracellular"	7.40122	10.6958	10.581	10.4209	10.0072	10.1274	10.9209	10.6997	10.5855
Glyma.02G014100	Glyma02g01760	-	-	-	AT2G25920.1	2e-81	BEST Arabidopsis thaliana protein match is: 3'-5' exonuclease domain-containing protein / K homology domain-containing protein / KH domain-containing protein (TAIR:AT2G25910.2); Has 131 Blast hits to 125 proteins in 54 species: Archae - 0; Bacteria - 50; Metazoa - 12; Fungi - 12; Plants - 41; Viruses - 0; Other Eukaryotes - 16 (source: NCBI BLink).	GO:0008150	biological process	GO:0003674	molecular function	GO:0005634	nucleus	6.79273	5.23545	5.4389	4.27844	2.65725	3.19098	2.85076	2.79844	2.6648
Glyma.02G014300	Glyma02g01780	Long cell-linked locus protein	B6SJT6_MAIZE	7e-18	AT5G38700.1	2e-43	unknown protein; FUNCTIONS IN: molecular_function unknown; INVOLVED IN: biological_process unknown; LOCATED IN: mitochondrion; EXPRESSED IN: 10 plant structures; EXPRESSED DURING: LP.04 four leaves visible, LP.10 ten leaves visible, petal differentiation and expansion stage, LP.08 eight leaves visible, LP.12 twelve leaves visible; BEST Arabidopsis thaliana protein match is: unknown protein (TAIR:…	GO:0008150	biological process	GO:0003674	molecular function	-	-	5.78809	3.31027	2.76565	0.810636	0.844749	3.13962	3.44317	3.20987	3.25754
Glyma.02G014500	Glyma02g01800	-	-	-	AT2G47480.1	8e-17	Protein of unknown function (DUF3511)	GO:0008150	biological process	GO:0003674	molecular function	GO:0005739	mitochondrion	5.65001	4.20193	4.03667	3.1825	1.95136	1.63411	1.48808	1.55496	1.05405
Glyma.02G014900	Glyma02g01841	-	-	-	-	-	-	-	-	-	-	-	-	5.35964	4.26106	4.53886	3.19313	0.617159	2.52372	2.85076	2.79844	2.39033
Glyma.02G015400	#N/A	-	-	-	-	-	-	-	-	-	-	-	-	1.09031	0.956444	-0.182774	1.54389	-1.35736	-1.01334	-1.10717	-1.08887	0.0814936
Glyma.02G015500	Glyma02g01900	Kinesin-4	G7IEJ0_MEDTR	0	AT2G47500.1	0	P-loop nucleoside triphosphate hydrolases superfamily protein with CH (Calponin Homology) domain	GO:0007018	microtubule-based movement	GO:0003777 GO:0005524	ATP binding; "microtubule motor activity"	GO:0005737	cytoplasm	6.00313	3.85568	3.90786	2.95851	3.20097	2.97124	3.07222	3.18595	2.48035
Glyma.02G015600	Glyma02g01910	Glycoside hydrolase family 28 family protein	U5G3P3_POPTR	0	AT3G16850.1	0	Pectin lyase-like superfamily protein	GO:0005975 GO:0006816 GO:0007030 GO:0009637 GO:0009651 GO:0010155 GO:0046777 GO:0048767	Golgi organization; "calcium ion transport"; "carbohydrate metabolic process"; "protein autophosphorylation"; "regulation of proton transport"; "response to blue light"; "response to salt stress"; "root hair elongation"	GO:0004650	polygalacturo-se activity	GO:0005576 GO:0005773 GO:0009505	extracellular region; "plant-type cell wall"; "vacuole"	9.24909	7.58705	7.34165	5.44951	1.49911	1.35684	0.54722	0.563364	1.05405
Glyma.02G015800	Glyma02g01930	Fumarate hydratase 1 family protein	B9GSD7_POPTR	0	AT5G50950.2	0	FUMARASE 2	GO:0006099 GO:0006106 GO:0009651 GO:0042128	fumarate metabolic process; "nitrate assimilation"; "response to salt stress"; "tricarboxylic acid cycle"	GO:0003824 GO:0004333 GO:0005515 GO:0016829	catalytic activity; "fumarate hydratase activity"; "lyase activity"; "protein binding"	GO:0005739 GO:0005829 GO:0045239	cytosol; "mitochondrion"; "tricarboxylic acid cycle enzyme complex"	2.39611	2.04718	1.58356	0.46158	-0.639723	NA	NA	NA	NA
Glyma.02G016100	Glyma02g01960	ERF protein	D9ICY5_SOYBN	0	AT3G16770.1	2e-42	ethylene-responsive element binding protein	GO:0006355 GO:0008219 GO:0009723 GO:0009735 GO:0009753 GO:0009873 GO:0010286 GO:0045893 GO:0051707	cell death; "ethylene mediated sig-ling pathway"; "heat acclimation"; "positive regulation of transcription, D--dependent"; "regulation of transcription, D--dependent"; "response to cytokinin stimulus"; "response to ethylene stimulus"; "response to jasmonic acid stimulus"; "response to other organism"	GO:0003677 GO:0003700 GO:0005515	D- binding; "protein binding"; "sequence-specific D- binding transcription factor activity"	GO:0005634 GO:0005737 GO:0005886	cytoplasm; "nucleus"; "plasma membrane"	9.70771	7.69674	7.44731	7.63723	6.81578	7.82591	9.33185	9.85981	9.38423
Glyma.02G016900	Glyma02g02050	-	-	-	AT4G02360.1	1e-49	Protein of unknown function, DUF538	GO:0008150	biological process	GO:0003674	molecular function	GO:0005576	extracellular region	6.75746	6.91456	7.05859	6.21349	4.36165	4.29118	4.82309	4.95131	4.57902
Glyma.02G017400	Glyma02g02100	Gamma-tubulin complex component 4 homolog	GCP4_MEDTR	0	AT3G53760.1	0	GAMMA-TUBULIN COMPLEX PROTEIN 4	GO:0000226 GO:0007020 GO:0009909 GO:0016570 GO:0040007 GO:0043622 GO:0048449	cortical microtubule organization; "floral organ formation"; "growth"; "histone modification"; "microtubule cytoskeleton organization"; "microtubule nucleation"; "regulation of flower development"	GO:0005515 GO:0015631	protein binding; "tubulin binding"	GO:0000922 GO:0005739 GO:0005815 GO:0009506 GO:0045298	microtubule organizing center; "mitochondrion"; "plasmodesma"; "spindle pole"; "tubulin complex"	6.88849	5.90772	6.00164	4.57988	3.54837	3.45179	3.2211	3.25034	2.23446
Glyma.02G017900	Glyma02g02160	Monoglyceride lipase	G7IF52_MEDTR	2e-158	AT3G62860.1	2e-154	alpha/beta-Hydrolases superfamily protein	-	-	GO:0003824	catalytic activity	GO:0005886	plasma membrane	-0.53121	0.0103776	0.171962	-0.52691	-1.35736	1.91744	1.96247	1.84828	1.90244
Glyma.02G018000	Glyma02g02170	UDP-glucuronic acid decarboxylase	G7IF53_MEDTR	0	AT3G62830.2	0	NAD(P)-binding Rossmann-fold superfamily protein	GO:0009225 GO:0019305 GO:0042732	D-xylose metabolic process; "dTDP-rhamnose biosynthetic process"; "nucleotide-sugar metabolic process"	GO:0003824 GO:0008460 GO:0048040	UDP-glucuro-te decarboxylase activity; "catalytic activity"; "dTDP-glucose 4,6-dehydratase activity"	GO:0000139 GO:0005768 GO:0005794 GO:0005802 GO:0005886 GO:0016020	Golgi apparatus; "Golgi membrane"; "endosome"; "membrane"; "plasma membrane"; "trans-Golgi network"	8.66315	8.18947	8.08916	7.02183	5.4586	5.30397	5.54813	5.50139	5.58145
Glyma.02G018700	Glyma02g02230	Hydroxyisourate hydrolase	HIUH_SOYBN	0	AT1G02850.2	0	beta glucosidase 11	GO:0005975	carbohydrate metabolic process	GO:0003824 GO:0004553 GO:0043169	catalytic activity; "cation binding"; "hydrolase activity, hydrolyzing O-glycosyl compounds"	GO:0005576	extracellular region	7.50399	5.9835	5.79544	4.58558	-0.362116	1.30728	1.79161	1.80166	1.58888
Glyma.02G018800	Glyma02g02240	Polyamine oxidase	R9WNZ0_GOSBA	2e-164	AT5G13700.1	2e-146	polyamine oxidase 1	GO:0006598 GO:0055114	oxidation-reduction process; "polyamine catabolic process"	GO:0046592 GO:0050660	flavin adenine dinucleotide binding; "polyamine oxidase activity"	GO:0005739	mitochondrion	5.12524	6.82742	6.14697	5.20844	2.58072	2.55181	3.47996	3.61389	3.31596
Glyma.02G019100	Glyma02g02290	Homeobox-leucine zipper protein	G7KB59_MEDTR	9e-157	AT1G69780.1	1e-120	Homeobox-leucine zipper protein family	GO:0006355 GO:0009744 GO:0009965 GO:0048826	cotyledon morphogenesis; "leaf morphogenesis"; "regulation of transcription, D--dependent"; "response to sucrose stimulus"	GO:0000976 GO:0003677 GO:0003700 GO:0043565	D- binding; "sequence-specific D- binding"; "sequence-specific D- binding transcription factor activity"; "transcription regulatory region sequence-specific D- binding"	GO:0005634	nucleus	8.14575	6.20377	6.14914	4.51937	2.74278	3.58813	4.06928	3.90205	3.42982
Glyma.02G019300	Glyma02g02310	MYB domain class transcription factor	D9ZJ68_MALDO	0	AT2G02820.2	5e-178	myb domain protein 88	GO:0006355 GO:0010052	guard cell differentiation; "regulation of transcription, D--dependent"	GO:0003677 GO:0003700	D- binding; "sequence-specific D- binding transcription factor activity"	GO:0005634	nucleus	6.9311	4.79406	4.60332	2.54349	1.1831	2.05225	0.11726	0.0787796	1.62926
Glyma.02G019400	Glyma02g02330	Solute carrier family protein	Q2HTW1_MEDTR	0	AT1G14360.1	0	UDP-galactose transporter 3	GO:0006457 GO:0009408 GO:0009553 GO:0009555 GO:0009627 GO:0009644 GO:0030968 GO:0034976 GO:0042542 GO:0055085	embryo sac development; "endoplasmic reticulum unfolded protein response"; "pollen development"; "protein folding"; "response to endoplasmic reticulum stress"; "response to heat"; "response to high light intensity"; "response to hydrogen peroxide"; "systemic acquired resistance"; "transmembrane transport"	GO:0005460 GO:0015165	UDP-glucose transmembrane transporter activity; "pyrimidine nucleotide-sugar transmembrane transporter activity"	GO:0030173 GO:0030176	integral to Golgi membrane; "integral to endoplasmic reticulum membrane"	5.59026	4.56241	4.27024	3.87643	1.95136	2.02495	2.69348	2.81381	2.53898
Glyma.02G019600	Glyma02g02350	SOUL heme-binding family protein	B9GGX3_POPTR	2e-104	AT1G17100.1	3e-95	SOUL heme-binding family protein	GO:0008150 GO:0019761	biological process; "glucosinolate biosynthetic process"	-	-	GO:0005773 GO:0005774 GO:0009507	chloroplast; "vacuolar membrane"; "vacuole"	11.5923	7.82234	7.82566	4.69756	3.48009	4.46755	5.28505	4.9316	4.59449
Glyma.02G020000	Glyma02g02400	Ubiquitin-conjugating enzyme E2-17 kDa family protein	A9PBR0_POPTR	3e-106	AT1G14400.2	2e-107	ubiquitin carrier protein 1	GO:0006301 GO:0006511 GO:0006605 GO:0006623 GO:0006661 GO:0006944 GO:0009910 GO:0009965 GO:0010228 GO:0016197 GO:0033523	cellular membrane fusion; "endosomal transport"; "histone H2B ubiquiti-tion"; "leaf morphogenesis"; "negative regulation of flower development"; "phosphatidylinositol biosynthetic process"; "postreplication repair"; "protein targeting"; "protein targeting to vacuole"; "ubiquitin-dependent protein catabolic process"; "vegetative to reproductive phase transition of meristem"	GO:0004842 GO:0016881	acid-amino acid ligase activity; "ubiquitin-protein ligase activity"	GO:0005634	nucleus	8.58983	6.99825	6.95803	5.54821	3.6185	3.69974	4.161	4.10981	3.67168
Glyma.02G020200	Glyma02g02420	CBS domain-containing family protein	U5FLM3_POPTR	0	AT1G69800.1	0	Cystathionine beta-synthase (CBS) protein	GO:0008150	biological process	-	-	-	-	6.46032	4.85658	4.6757	4.18913	2.66461	3.01262	3.42066	3.37993	3.6171
Glyma.02G020600	Glyma02g02460	Pectate lyase	G7K9T3_MEDTR	0	AT1G14420.1	0	Pectate lyase family protein	GO:0009664 GO:0009827	plant-type cell wall modification; "plant-type cell wall organization"	GO:0016829 GO:0030570	lyase activity; "pectate lyase activity"	GO:0005576	extracellular region	2.45457	1.23619	1.43083	NA	3.50384	4.39347	3.04961	2.88594	2.68423
Glyma.02G020700	#N/A	-	-	-	-	-	-	-	-	-	-	-	-	3.21889	2.05728	1.7729	-0.52691	1.98467	2.55191	0.632741	0.608358	1.00311
Glyma.02G020900	Glyma02g02500	Hypersensitive-induced response protein	Q5KSB6_LOTJA	0	AT5G62740.1	2e-173	SPFH/Band 7/PHB domain-containing membrane-associated protein family	GO:0006499	N-termi-l protein myristoylation	GO:0005515 GO:0043424	protein binding; "protein histidine ki-se binding"	GO:0005773 GO:0005774 GO:0005794 GO:0005886 GO:0009506 GO:0016020	Golgi apparatus; "membrane"; "plasma membrane"; "plasmodesma"; "vacuolar membrane"; "vacuole"	3.6937	2.85974	2.9995	2.53972	0.0476376	-1.01334	NA	NA	NA
Glyma.02G021000	#N/A	-	-	-	AT2G34450.1	1e-06	HMG-box (high mobility group) DNA-binding family protein	GO:0006333	chromatin assembly or disassembly	GO:0003700	sequence-specific D- binding transcription factor activity	GO:0005634	nucleus	2.67471	2.83565	1.84427	2.37721	0.376098	-0.986998	-0.891919	-0.91204	-1.07126
Glyma.02G021100	Glyma02g02520	-	-	-	-	-	-	-	-	-	-	-	-	1.57884	1.8529	0.974578	1.65927	-0.639723	NA	NA	NA	NA
Glyma.02G021300	Glyma02g02530	-	-	-	-	-	-	-	-	-	-	-	-	1.84668	1.13761	0.698777	-1.52331	NA	NA	-1.10717	-1.08887	NA
Glyma.02G021400	Glyma02g02540	Hypersensitive-induced response protein	Q5KSB6_LOTJA	0	AT5G62740.1	0	SPFH/Band 7/PHB domain-containing membrane-associated protein family	GO:0006499	N-termi-l protein myristoylation	GO:0005515 GO:0043424	protein binding; "protein histidine ki-se binding"	GO:0005773 GO:0005774 GO:0005794 GO:0005886 GO:0009506 GO:0016020	Golgi apparatus; "membrane"; "plasma membrane"; "plasmodesma"; "vacuolar membrane"; "vacuole"	11.3194	8.13193	8.00234	5.86029	4.40016	4.04629	3.94835	3.88511	3.8983
Glyma.02G021500	Glyma02g02550	Hypersensitive-induced response protein	Q5KSB6_LOTJA	4e-179	AT5G62740.1	7e-174	SPFH/Band 7/PHB domain-containing membrane-associated protein family	GO:0006499	N-termi-l protein myristoylation	GO:0005515 GO:0043424	protein binding; "protein histidine ki-se binding"	GO:0005773 GO:0005774 GO:0005794 GO:0005886 GO:0009506 GO:0016020	Golgi apparatus; "membrane"; "plasma membrane"; "plasmodesma"; "vacuolar membrane"; "vacuole"	11.2532	8.94379	9.06238	7.3406	2.39829	1.88057	-1.10717	-1.08887	0.0814936
Glyma.02G021900	Glyma02g02590	Genomic DNA, chromosome 3, P1 clone: MEB5	Q9LVI0_ARATH	0	AT3G17900.1	0	unknown protein; FUNCTIONS IN: molecular_function unknown; INVOLVED IN: biological_process unknown; LOCATED IN: cellular_component unknown; EXPRESSED IN: 23 plant structures; EXPRESSED DURING: 13 growth stages; Has 45 Blast hits to 44 proteins in 14 species: Archae - 0; Bacteria - 0; Metazoa - 2; Fungi - 2; Plants - 39; Viruses - 0; Other Eukaryotes - 2 (source: NCBI BLink).	GO:0008150	biological process	GO:0003674	molecular function	GO:0009507	chloroplast	6.54468	6.53516	6.21335	5.21716	3.47646	4.49039	4.20972	4.02886	4.10765
Glyma.02G022700	Glyma02g02680	Peptide transporter PTR1	G7K9P5_MEDTR	0	AT1G69870.1	0	nitrate transporter 1.7	GO:0006857 GO:0015706 GO:0019761 GO:0080055	glucosinolate biosynthetic process; "low affinity nitrate transport"; "nitrate transport"; "oligopeptide transport"	GO:0005215 GO:0080054	low affinity nitrate transmembrane transporter activity; "transporter activity"	GO:0005886 GO:0016020	membrane; "plasma membrane"	3.57256	2.92633	2.36538	1.92849	NA	-0.986998	-0.891919	-0.91204	0.00225974
Glyma.02G023500	Glyma02g02740	DnaJ homolog subfamily B member	G7K8E9_MEDTR	6e-120	AT3G08910.1	4e-102	DNAJ heat shock family protein	GO:0006457	protein folding	GO:0031072 GO:0051082	heat shock protein binding; "unfolded protein binding"	GO:0005737	cytoplasm	7.29106	4.62981	4.8275	1.73508	2.2046	2.66456	1.79161	1.80166	1.30282
Glyma.02G023800	Glyma02g02777	TIR-NBS-LRR type disease resistance protein	C6ZS34_SOYBN	0	AT2G20142.1	5e-44	Toll-Interleukin-Resistance (TIR) domain family protein	GO:0007165	sig-l transduction	-	-	GO:0005622 GO:0005737	cytoplasm; "intracellular"	7.0243	5.29131	5.06315	4.04698	2.29243	1.35684	2.18298	2.30653	2.10438
Glyma.02G023900	Glyma02g02790	TIR-NBS-LRR type disease resistance protein	C6ZS34_SOYBN	2e-125	AT1G72950.1	1e-41	Disease resistance protein (TIR-NBS class)	GO:0006952 GO:0007165	defense response; "sig-l transduction"	GO:0043531	ADP binding	GO:0005622	intracellular	6.31644	3.79244	3.99576	2.45712	-1.35736	-1.01334	-1.10717	-1.08887	-0.927841
Glyma.02G024300	Glyma02g02831	-	-	-	-	-	-	-	-	-	-	-	-	NA	NA	NA	NA	-1.35736	-1.01334	NA	NA	0.675164
Glyma.02G024500	Glyma02g02850	Tetratricopeptide repeat protein	G7K8A8_MEDTR	0	AT1G27150.1	0	Tetratricopeptide repeat (TPR)-like superfamily protein	GO:0008150	biological process	-	-	GO:0005634	nucleus	5.06705	4.05802	3.68206	3.67126	2.09154	2.40139	0.632741	0.608358	1.62926
Glyma.02G024900	Glyma02g02890	Wall-associated receptor kinase-like protein	G7K8A0_MEDTR	8e-177	AT1G10380.1	1e-95	Putative membrane lipoprotein	GO:0008150	biological process	GO:0003674	molecular function	GO:0005576	extracellular region	5.006	4.43568	4.45688	3.32823	0.503705	0.998455	1.74428	1.79195	-0.0798389
Glyma.02G025200	Glyma02g02920	CW14 protein	Q9SLT5_ARATH	0	AT1G59650.1	0	Protein of unknown function (DUF1336)	GO:0006499	N-termi-l protein myristoylation	GO:0003674	molecular function	GO:0005634 GO:0005886	nucleus; "plasma membrane"	3.87288	4.30605	4.05737	3.69714	2.49099	2.25969	2.5386	2.69836	1.05405
Glyma.02G025400	Glyma02g02934	BHLH transcription factor	G7K714_MEDTR	2e-95	AT1G59640.1	9e-89	BIG PETAL P	GO:0006355 GO:0009062 GO:0009694 GO:0009753 GO:0009827 GO:0009860 GO:0010162 GO:0048441 GO:0048443 GO:0048446 GO:0048481	fatty acid catabolic process; "jasmonic acid metabolic process"; "ovule development"; "petal development"; "petal morphogenesis"; "plant-type cell wall modification"; "pollen tube growth"; "regulation of transcription, D--dependent"; "response to jasmonic acid stimulus"; "seed dormancy process"; "stamen development"	GO:0003677 GO:0003700	D- binding; "sequence-specific D- binding transcription factor activity"	GO:0005634	nucleus	4.51757	3.27695	2.62773	1.61804	-0.362116	0.592839	0.0047454	0.00190919	-1.07126
Glyma.02G025500	Glyma02g02942	Transcription factor bHLH79	G7LEL6_MEDTR	6e-98	AT1G59640.1	2e-88	BIG PETAL P	GO:0006355 GO:0009062 GO:0009694 GO:0009753 GO:0009827 GO:0009860 GO:0010162 GO:0048441 GO:0048443 GO:0048446 GO:0048481	fatty acid catabolic process; "jasmonic acid metabolic process"; "ovule development"; "petal development"; "petal morphogenesis"; "plant-type cell wall modification"; "pollen tube growth"; "regulation of transcription, D--dependent"; "response to jasmonic acid stimulus"; "seed dormancy process"; "stamen development"	GO:0003677 GO:0003700	D- binding; "sequence-specific D- binding transcription factor activity"	GO:0005634	nucleus	5.36983	3.69024	3.29733	1.42834	NA	NA	NA	NA	NA
Glyma.02G025700	Glyma02g02980	CLE27 protein	C6SX48_SOYBN	2e-78	AT1G69970.1	2e-07	CLAVATA3/ESR-RELATED 26	GO:0007165	sig-l transduction	GO:0005102 GO:0033612	receptor binding; "receptor serine/threonine ki-se binding"	GO:0005576 GO:0048046	apoplast; "extracellular region"	3.22903	2.41027	2.22744	1.06292	-0.639723	NA	-0.114753	-0.081287	NA
Glyma.02G026300	Glyma02g03020	MYB transcription factor MYB138	Q0PJI4_SOYBN	0	AT1G70000.2	4e-77	myb-like transcription factor family protein	GO:0006355 GO:0009651 GO:0009723 GO:0009733 GO:0009737 GO:0009739 GO:0009751 GO:0009753 GO:0046686 GO:0080167	regulation of transcription, D--dependent; "response to abscisic acid stimulus"; "response to auxin stimulus"; "response to cadmium ion"; "response to ethylene stimulus"; "response to gibberellin stimulus"; "response to jasmonic acid stimulus"; "response to karrikin"; "response to salicylic acid stimulus"; "response to salt stress"	GO:0003676 GO:0003677 GO:0003700 GO:0008270	D- binding; "nucleic acid binding"; "sequence-specific D- binding transcription factor activity"; "zinc ion binding"	GO:0005634	nucleus	6.95862	5.376	4.78541	3.66646	-1.35736	1.28297	2.00847	1.99819	2.19155
Glyma.02G026500	Glyma02g03040	UPF0392 protein RCOM_0530710	Y232_RICCO	0	AT1G27200.1	0	Domain of unknown function (DUF23)	GO:0008150	biological process	-	-	GO:0005634 GO:0005794	Golgi apparatus; "nucleus"	6.24926	5.24847	5.12918	3.53762	3.03025	2.88722	2.66339	2.57771	3.00756
Glyma.02G026900	Glyma02g03090	Glycosyltransferase CAZy family GT8	G7K5M7_MEDTR	0	AT1G70090.2	0	glucosyl transferase family 8	GO:0016051	carbohydrate biosynthetic process	GO:0016757 GO:0016758 GO:0047262	polygalacturo-te 4-alpha-galacturonosyltransferase activity; "transferase activity, transferring glycosyl groups"; "transferase activity, transferring hexosyl groups"	GO:0005794	Golgi apparatus	8.38854	7.77941	7.90856	6.48037	4.11575	3.77338	4.16055	4.22774	4.2876
Glyma.02G027100	Glyma02g03111	F20P5.17 protein	O04535_ARATH	5e-54	AT1G70100.4	1e-59	unknown protein; FUNCTIONS IN: molecular_function unknown; INVOLVED IN: biological_process unknown; LOCATED IN: cellular_component unknown; EXPRESSED IN: 22 plant structures; EXPRESSED DURING: 13 growth stages; BEST Arabidopsis thaliana protein match is: unknown protein (TAIR:AT1G24160.2); Has 3305 Blast hits to 2533 proteins in 359 species: Archae - 8; Bacteria - 641; Metazoa - 1288; Fungi - 248…	GO:0008150	biological process	GO:0003674	molecular function	GO:0005634	nucleus	7.57752	7.18528	6.7921	6.12993	4.38497	4.46794	4.20114	4.2085	4.1003
Glyma.02G027200	Glyma02g03120	Formin-like protein	G7K5M3_MEDTR	0	AT1G70140.1	8e-176	formin 8	GO:0000278 GO:0002679 GO:0006396 GO:0006865 GO:0009407 GO:0009932 GO:0010200 GO:0010583 GO:0015824 GO:0045010	R- processing; "actin nucleation"; "amino acid transport"; "cell tip growth"; "mitotic cell cycle"; "proline transport"; "respiratory burst involved in defense response"; "response to chitin"; "response to cyclopentenone"; "toxin catabolic process"	GO:0003779 GO:0005522 GO:0051015	actin binding; "actin filament binding"; "profilin binding"	GO:0005886 GO:0005911	cell-cell junction; "plasma membrane"	3.7583	3.87728	3.39573	3.11215	0.760157	-1.01334	NA	NA	-0.927841
Glyma.02G027400	Glyma02g03140	Type A response regulator RR1	B0YGG5_PHAVU	3e-110	AT1G59940.1	8e-70	response regulator 3	GO:0000160 GO:0006355 GO:0007623 GO:0009735 GO:0009736 GO:0010114 GO:0010161 GO:0042752	circadian rhythm; "cytokinin mediated sig-ling pathway"; "phosphorelay sig-l transduction system"; "red light sig-ling pathway"; "regulation of circadian rhythm"; "regulation of transcription, D--dependent"; "response to cytokinin stimulus"; "response to red light"	GO:0000156	phosphorelay response regulator activity	GO:0005634 GO:0005737	cytoplasm; "nucleus"	7.44361	7.62552	7.53201	6.48106	4.61506	5.26869	6.53782	6.21952	5.95074
Glyma.02G028000	Glyma02g03210	Matrix metalloproteinase	B6CAM2_SOYBN	0	AT1G59970.1	3e-36	Matrixin family protein	GO:0006508 GO:0008152	metabolic process; "proteolysis"	GO:0004222 GO:0008237 GO:0008270	metalloendopeptidase activity; "metallopeptidase activity"; "zinc ion binding"	GO:0005576 GO:0005886 GO:0031012 GO:0031225	anchored to membrane; "extracellular matrix"; "extracellular region"; "plasma membrane"	3.0108	4.58364	1.55088	3.3469	0.760157	-0.000621929	-0.891919	-0.91204	-1.07126
Glyma.02G028100	Glyma02g03230	Matrix metalloproteinase	B6CAM2_SOYBN	0	AT1G59970.1	4e-39	Matrixin family protein	GO:0006508 GO:0008152	metabolic process; "proteolysis"	GO:0004222 GO:0008237 GO:0008270	metalloendopeptidase activity; "metallopeptidase activity"; "zinc ion binding"	GO:0005576 GO:0005886 GO:0031012 GO:0031225	anchored to membrane; "extracellular matrix"; "extracellular region"; "plasma membrane"	10.2292	10.2303	8.64294	8.94056	3.48009	3.2879	4.71467	5.11626	3.68672
Glyma.02G028200	Glyma02g03250	Matrix metalloproteinase	B6CAM2_SOYBN	0	AT1G59970.1	1e-41	Matrixin family protein	GO:0006508 GO:0008152	metabolic process; "proteolysis"	GO:0004222 GO:0008237 GO:0008270	metalloendopeptidase activity; "metallopeptidase activity"; "zinc ion binding"	GO:0005576 GO:0005886 GO:0031012 GO:0031225	anchored to membrane; "extracellular matrix"; "extracellular region"; "plasma membrane"	6.30175	7.30866	5.53329	5.62332	-0.362116	1.30728	2.59697	2.70319	0.951408
Glyma.02G028600	#N/A	Matrix metalloproteinase	B6CAM2_SOYBN	0	AT1G59970.1	3e-42	Matrixin family protein	GO:0006508 GO:0008152	metabolic process; "proteolysis"	GO:0004222 GO:0008237 GO:0008270	metalloendopeptidase activity; "metallopeptidase activity"; "zinc ion binding"	GO:0005576 GO:0005886 GO:0031012 GO:0031225	anchored to membrane; "extracellular matrix"; "extracellular region"; "plasma membrane"	6.15122	6.79029	4.9218	5.18436	NA	NA	0.87055	0.93341	NA
Glyma.02G028700	#N/A	Matrix metalloproteinase	B6CAM2_SOYBN	0	AT1G59970.1	3e-41	Matrixin family protein	GO:0006508 GO:0008152	metabolic process; "proteolysis"	GO:0004222 GO:0008237 GO:0008270	metalloendopeptidase activity; "metallopeptidase activity"; "zinc ion binding"	GO:0005576 GO:0005886 GO:0031012 GO:0031225	anchored to membrane; "extracellular matrix"; "extracellular region"; "plasma membrane"	6.76102	8.43113	6.80071	7.01446	2.49103	3.14735	4.20957	4.37161	3.95901
Glyma.02G028800	Glyma02g03320	Matrix metalloproteinase	B6CAM2_SOYBN	0	AT1G59970.1	9e-37	Matrixin family protein	GO:0006508 GO:0008152	metabolic process; "proteolysis"	GO:0004222 GO:0008237 GO:0008270	metalloendopeptidase activity; "metallopeptidase activity"; "zinc ion binding"	GO:0005576 GO:0005886 GO:0031012 GO:0031225	anchored to membrane; "extracellular matrix"; "extracellular region"; "plasma membrane"	7.65158	9.62301	6.91628	8.17648	2.58046	1.96871	4.6257	5.07396	3.98584
Glyma.02G029200	Glyma02g03350	WD repeat-containing protein-like protein	G7K5I2_MEDTR	2e-174	AT1G24130.1	3e-138	Transducin/WD40 repeat-like superfamily protein	GO:0008150	biological process	GO:0000166	nucleotide binding	GO:0005737 GO:0005834	cytoplasm; "heterotrimeric G-protein complex"	6.23363	3.85944	4.11636	1.02941	-0.639723	NA	NA	NA	NA
Glyma.02G029700	Glyma02g03405	-	-	-	-	-	-	-	-	-	-	-	-	NA	NA	NA	NA	0.0476376	-0.000621929	1.8797	1.97628	0.00225974
Glyma.02G029900	Glyma02g03420	N-hydroxythioamide S-beta-glucosyltransferase	G7K464_MEDTR	0	AT1G24100.1	2e-162	UDP-glucosyl transferase 74B1	GO:0006857 GO:0008150 GO:0009741	biological process; "oligopeptide transport"; "response to brassinosteroid stimulus"	GO:0000166	nucleotide binding	GO:0005834 GO:0005886	heterotrimeric G-protein complex; "plasma membrane"	2.4219	4.96566	2.25623	4.70941	6.61808	6.79779	7.20308	7.41776	7.20077
Glyma.02G030000	#N/A	Resistance protein	G7K8B4_MEDTR	6e-176	AT3G14470.1	8e-44	NB-ARC domain-containing disease resistance protein	GO:0006952 GO:0009627 GO:0009697	defense response; "salicylic acid biosynthetic process"; "systemic acquired resistance"	GO:0005515 GO:0043531	ADP binding; "protein binding"	GO:0005576	extracellular region	6.29757	3.66754	3.62115	1.5	NA	NA	NA	NA	NA
Glyma.02G030100	Glyma02g03460	RNA recognition motif (RRM)-containing protein-like protein	G7K2V9_MEDTR	6e-144	AT1G70200.1	3e-55	RNA-binding (RRM/RBD/RNP motifs) family protein	GO:0006364 GO:0006399 GO:0009658 GO:0010027 GO:0045036	chloroplast organization; "protein targeting to chloroplast"; "rR- processing"; "tR- metabolic process"; "thylakoid membrane organization"	GO:0003676	nucleic acid binding	GO:0009507	chloroplast	6.30957	6.60942	6.79945	6.7642	5.25175	4.99465	4.59964	4.66324	4.4071
Glyma.02G030200	Glyma02g03490	Cyclin-D1-1	G7K443_MEDTR	7e-165	AT1G70210.1	3e-135	CYCLIN D1;1	GO:0000278 GO:0010440 GO:0042023 GO:0045736 GO:0051726	D- endoreduplication; "mitotic cell cycle"; "negative regulation of cyclin-dependent protein serine/threonine ki-se activity"; "regulation of cell cycle"; "stomatal lineage progression"	GO:0005515 GO:0016538	cyclin-dependent protein serine/threonine ki-se regulator activity; "protein binding"	GO:0005634	nucleus	7.89776	4.84581	4.54846	4.03984	3.31473	4.67094	5.54534	5.14951	4.93464
Glyma.02G030800	Glyma02g03530	-	-	-	AT1G60010.1	2e-57	unknown protein; FUNCTIONS IN: molecular_function unknown; INVOLVED IN: N-terminal protein myristoylation; LOCATED IN: cellular_component unknown; EXPRESSED IN: 22 plant structures; EXPRESSED DURING: 13 growth stages; BEST Arabidopsis thaliana protein match is: unknown protein (TAIR:AT1G10530.1); Has 185 Blast hits to 185 proteins in 18 species: Archae - 0; Bacteria - 0; Metazoa - 0; Fungi - 3; P…	GO:0006499 GO:0006833 GO:0009651 GO:0009750	N-termi-l protein myristoylation; "response to fructose stimulus"; "response to salt stress"; "water transport"	GO:0003674	molecular function	GO:0005634	nucleus	7.48105	12.1207	12.3864	10.312	7.8465	8.35049	9.27706	8.80695	8.85785
Glyma.02G030900	Glyma02g03540	Sterol 4-alpha-methyl-oxidase	G7K2U6_MEDTR	0	AT1G07420.1	4e-170	sterol 4-alpha-methyl-oxidase 2-1	GO:0006333 GO:0006633 GO:0016126 GO:0046520 GO:0055114	chromatin assembly or disassembly; "fatty acid biosynthetic process"; "oxidation-reduction process"; "sphingoid biosynthetic process"; "sterol biosynthetic process"	GO:0000254 GO:0005506 GO:0016491 GO:0080065	4-alpha-methyl-delta7-sterol-4alpha-methyl oxidase activity; "C-4 methylsterol oxidase activity"; "iron ion binding"; "oxidoreductase activity"	GO:0009941	chloroplast envelope	9.83952	6.80794	6.76898	3.78552	0.0476376	1.28297	2.29333	2.31777	2.0047
Glyma.02G031200	Glyma02g03570	Protein ALTERED XYLOGLUCAN 4	TBL27_ARATH	1e-120	AT1G70230.1	1e-123	TRICHOME BIREFRINGENCE-LIKE 27	GO:0010167 GO:0010411 GO:0015706	nitrate transport; "response to nitrate"; "xyloglucan metabolic process"	-	-	GO:0005634 GO:0005794	Golgi apparatus; "nucleus"	5.43151	5.43887	6.30223	4.2977	NA	NA	NA	NA	0.675164
Glyma.02G031300	Glyma02g03580	Protein ALTERED XYLOGLUCAN 4	TBL27_ARATH	1e-126	AT1G70230.1	1e-129	TRICHOME BIREFRINGENCE-LIKE 27	GO:0010167 GO:0010411 GO:0015706	nitrate transport; "response to nitrate"; "xyloglucan metabolic process"	-	-	GO:0005634 GO:0005794	Golgi apparatus; "nucleus"	4.12427	5.83088	6.1997	4.72627	2.17909	1.33261	0.632741	0.608358	1.00311
Glyma.02G031900	Glyma02g03650	Protein ALTERED XYLOGLUCAN 4	TBL27_ARATH	4e-174	AT1G70230.1	5e-177	TRICHOME BIREFRINGENCE-LIKE 27	GO:0010167 GO:0010411 GO:0015706	nitrate transport; "response to nitrate"; "xyloglucan metabolic process"	-	-	GO:0005634 GO:0005794	Golgi apparatus; "nucleus"	5.89832	4.11442	3.55433	2.33873	0.376098	NA	-1.10717	-1.08887	NA
Glyma.02G032300	Glyma02g03680	MLP-like protein	B7FKA0_MEDTR	4e-75	AT1G24020.2	5e-59	MLP-like protein 423	GO:0006952 GO:0016556	defense response; "mR- modification"	-	-	GO:0009507 GO:0016020	chloroplast; "membrane"	5.25889	3.64757	3.46391	1.76077	-1.35736	0.574819	1.74428	1.79195	0.55635
Glyma.02G032500	Glyma02g03710	Auxin-induced protein 5NG4	G7K2R8_MEDTR	4e-125	AT5G40210.1	2e-78	nodulin MtN21 /EamA-like transporter family protein	GO:0006863	purine nucleobase transport	-	-	GO:0016020	membrane	6.89024	6.05128	5.82568	4.57646	NA	NA	NA	NA	-0.927841
Glyma.02G032600	Glyma02g03725	Auxin-induced protein 5NG4	G7K2R8_MEDTR	1e-166	AT3G28050.1	2e-83	nodulin MtN21 /EamA-like transporter family protein	GO:0008150	biological process	-	-	GO:0016020	membrane	1.31748	1.95027	-1.15491	1.02941	NA	-0.00299611	1.29906	1.31204	-0.0798389
Glyma.02G032700	Glyma02g03740	-	-	-	AT1G60060.1	1e-158	Serine/threonine-protein kinase WNK (With No Lysine)-related	GO:0008150	biological process	GO:0003674	molecular function	GO:0005576	extracellular region	5.18698	5.51006	5.27728	4.86207	1.78481	2.23513	3.08635	3.08369	3.10796
Glyma.02G032900	Glyma02g03755	-	-	-	-	-	-	-	-	-	-	-	-	1.94327	1.44024	1.71046	0.5	1.82944	1.64536	-1.10717	-1.08887	-0.927841
Glyma.02G033100	Glyma02g03770	NBS/LRR resistance protein-like protein	G7J2A2_MEDTR	8e-16	-	-	-	-	-	-	-	-	-	6.23408	4.98475	5.05228	3.86648	2.86965	3.64846	3.64895	3.63758	3.52208
Glyma.02G033200	Glyma02g03780	RING finger protein	G7K1H8_MEDTR	2e-160	AT5G40250.1	2e-112	RING/U-box superfamily protein	-	-	GO:0008270	zinc ion binding	GO:0005634	nucleus	3.87487	2.34074	2.29745	0.5	0.760157	0.574819	0.632741	0.608358	-0.0798389
Glyma.02G033400	Glyma02g03810	NHL repeat-containing family protein	B9HJT0_POPTR	0	AT1G70280.2	0	NHL domain-containing protein	GO:0000394 GO:0008150 GO:0009086	R- splicing, via endonucleolytic cleavage and ligation; "biological process"; "methionine biosynthetic process"	GO:0003674	molecular function	GO:0005576 GO:0005634	extracellular region; "nucleus"	6.49081	3.07714	2.96546	NA	NA	NA	NA	NA	NA
Glyma.02G033800	Glyma02g03840	-	-	-	-	-	-	-	-	-	-	-	-	2.1246	1.92216	1.71046	1.06292	-1.35736	-1.01334	-1.10717	-1.08887	0.0814936
Glyma.02G034400	Glyma02g03920	SAM domain and HD domain-containing protein	G7K1E7_MEDTR	0	AT5G40270.1	0	HD domain-containing metal-dependent phosphohydrolase family protein	-	-	GO:0003824 GO:0008081 GO:0046872	catalytic activity; "metal ion binding"; "phosphoric diester hydrolase activity"	GO:0005634	nucleus	5.74128	5.6594	6.04165	4.26851	3.28807	3.47803	2.40616	2.3216	2.41992
Glyma.02G034700	Glyma02g03960	Polygalacturonase-1 non-catalytic subunit beta	G7K1D9_MEDTR	0	AT1G70370.2	0	polygalacturonase 2	GO:0000271 GO:0000272 GO:0005982 GO:0007389 GO:0008150 GO:0008361 GO:0009664 GO:0009825 GO:0009832 GO:0009926 GO:0009932 GO:0010015 GO:0010075 GO:0010817 GO:0040007 GO:0043481 GO:0048653 GO:0048767 GO:0071555	anther development; "anthocyanin accumulation in tissues in response to UV light"; "auxin polar transport"; "biological process"; "cell tip growth"; "cell wall organization"; "growth"; "multidimensio-l cell growth"; "pattern specification process"; "plant-type cell wall biogenesis"; "plant-type cell wall organization"; "polysaccharide biosynthetic process"; "polysaccharide catabolic process"; "re…	GO:0004650	polygalacturo-se activity	GO:0005576	extracellular region	6.405	4.48588	4.52809	2.38857	0.376098	-0.986998	-0.891919	-0.91204	0.618643
Glyma.02G035000	Glyma02g03990	Carbonic anhydrase	I1J593_SOYBN	0	AT5G14740.2	2e-133	carbonic anhydrase 2	GO:0000165 GO:0006612 GO:0009409 GO:0009595 GO:0009697 GO:0009814 GO:0009862 GO:0009867 GO:0010200 GO:0010310 GO:0010363 GO:0015976 GO:0019243 GO:0019684 GO:0031348 GO:0042742 GO:0043900 GO:0050832	MAPK cascade; "carbon utilization"; "defense response, incompatible interaction"; "defense response to bacterium"; "defense response to fungus"; "detection of biotic stimulus"; "jasmonic acid mediated sig-ling pathway"; "methylglyoxal catabolic process to D-lactate"; "negative regulation of defense response"; "photosynthesis, light reaction"; "protein targeting to membrane"; "regulation of hydrog…	GO:0004089 GO:0008270	carbo-te dehydratase activity; "zinc ion binding"	GO:0005737 GO:0005829 GO:0009507 GO:0009535 GO:0009570 GO:0009941 GO:0048046	apoplast; "chloroplast"; "chloroplast envelope"; "chloroplast stroma"; "chloroplast thylakoid membrane"; "cytoplasm"; "cytosol"	7.46511	5.70285	5.67413	3.90484	NA	-0.00299611	0.632741	0.608358	1.00311
Glyma.02G035200	Glyma02g04000	-	-	-	AT1G70420.1	7e-53	Protein of unknown function (DUF1645)	GO:0080167	response to karrikin	GO:0003674	molecular function	GO:0005634	nucleus	9.10539	7.35226	7.32512	6.25823	4.62083	3.83418	4.06348	4.27071	3.95931
Glyma.02G035400	Glyma02g04020	-	-	-	AT1G23530.1	7e-15	unknown protein; BEST Arabidopsis thaliana protein match is: unknown protein (TAIR:AT1G70470.1); Has 38 Blast hits to 38 proteins in 12 species: Archae - 0; Bacteria - 0; Metazoa - 0; Fungi - 0; Plants - 37; Viruses - 0; Other Eukaryotes - 1 (source: NCBI BLink).	GO:0008150	biological process	GO:0003674	molecular function	GO:0005634	nucleus	2.26665	1.60759	1.84427	-0.52691	-0.639723	NA	-1.10717	-1.08887	NA
Glyma.02G035500	Glyma02g04031	F8A5.1 protein	O22692_ARATH	7e-65	AT1G60460.3	1e-93	unknown protein; FUNCTIONS IN: molecular_function unknown; INVOLVED IN: biological_process unknown; LOCATED IN: endomembrane system; EXPRESSED IN: 6 plant structures; EXPRESSED DURING: petal differentiation and expansion stage, E expanded cotyledon stage, D bilateral stage; Has 35333 Blast hits to 34131 proteins in 2444 species: Archae - 798; Bacteria - 22429; Metazoa - 974; Fungi - 991; Plants -…	GO:0008150	biological process	GO:0003674	molecular function	GO:0009507	chloroplast	2.00912	2.20041	1.2274	2.08496	3.49562	4.509	3.67305	3.62913	3.77641
Glyma.02G035800	Glyma02g04070	F20B24.9	Q9SGY4_ARATH	7e-123	AT1G10650.1	2e-132	SBP (S-ribonuclease binding protein) family protein	GO:0008150	biological process	GO:0008270	zinc ion binding	GO:0005737	cytoplasm	8.43594	7.47566	7.278	6.61204	5.26324	5.43692	4.87111	4.8842	4.97107
Glyma.02G036300	Glyma02g04120	ATP citrate lyase b-subunit	Q93YH3_LUPAL	0	AT1G10670.4	0	ATP-citrate lyase A-1	GO:0000271 GO:0006084 GO:0006085 GO:0006633 GO:0007568 GO:0009825 GO:0009911 GO:0009932 GO:0010025 GO:0010817 GO:0015995 GO:0016117 GO:0019252 GO:0019344 GO:0030244 GO:0043481 GO:0045793 GO:0045995 GO:0048193 GO:0048366 GO:0048767 GO:0071555	Golgi vesicle transport; "acetyl-CoA biosynthetic process"; "acetyl-CoA metabolic process"; "aging"; "anthocyanin accumulation in tissues in response to UV light"; "carotenoid biosynthetic process"; "cell tip growth"; "cell wall organization"; "cellulose biosynthetic process"; "chlorophyll biosynthetic process"; "cysteine biosynthetic process"; "fatty acid biosynthetic process"; "leaf development…	GO:0003878 GO:0005524 GO:0016874	ATP binding; "ATP citrate synthase activity"; "ligase activity"	GO:0005737 GO:0005829 GO:0009346	citrate lyase complex; "cytoplasm"; "cytosol"	10.067	8.8815	8.82014	8.05313	7.1746	7.50537	7.29048	7.32466	7.15106
Glyma.02G036400	Glyma02g04130	F-box/kelch-repeat protein	G7K074_MEDTR	1e-167	AT1G23390.1	6e-82	Kelch repeat-containing F-box family protein	GO:0008150	biological process	GO:0003674	molecular function	GO:0005634	nucleus	4.85152	3.3027	3.18345	1.02941	2.93269	3.75878	3.76128	3.74789	3.64332
Glyma.02G036500	Glyma02g04150	Leucine-rich repeat receptor-like kinase	E2IXG6_MEDTR	0	AT1G60800.1	0	NSP-interacting kinase 3	GO:0006468 GO:0007020 GO:0010075 GO:0048653	anther development; "microtubule nucleation"; "protein phosphorylation"; "regulation of meristem growth"	GO:0004672 GO:0004674 GO:0005524 GO:0016301 GO:0016772	ATP binding; "ki-se activity"; "protein ki-se activity"; "protein serine/threonine ki-se activity"; "transferase activity, transferring phosphorus-containing groups"	GO:0005576 GO:0005886	extracellular region; "plasma membrane"	7.90046	5.95062	5.21051	3.78552	2.3027	2.9154	2.13183	2.01801	2.09318
Glyma.02G036700	Glyma02g04171	Protein trichome birefringence-like 2	TBL2_ARATH	0	AT1G60790.1	0	Plant protein of unknown function (DUF828)	GO:0008150	biological process	-	-	-	-	5.95829	3.63992	3.6047	0.774788	-0.362116	0.00114721	-1.10717	-1.08887	-0.927841
Glyma.02G037200	Glyma02g04220	Cysteine-rich receptor-like protein kinase 3	CRK3_ARATH	0	AT1G70530.1	0	cysteine-rich RLK (RECEPTOR-like protein kinase) 3	GO:0006468 GO:0009627 GO:0031347	protein phosphorylation; "regulation of defense response"; "systemic acquired resistance"	GO:0004672 GO:0004674 GO:0005524 GO:0016301 GO:0016772	ATP binding; "ki-se activity"; "protein ki-se activity"; "protein serine/threonine ki-se activity"; "transferase activity, transferring phosphorus-containing groups"	GO:0005576 GO:0005886	extracellular region; "plasma membrane"	8.12291	6.42478	6.51765	4.5554	NA	NA	NA	NA	NA
Glyma.02G037400	Glyma02g04240	Carboxyl-terminal proteinase-like protein	G7K053_MEDTR	0	AT1G70550.2	0	Protein of Unknown Function (DUF239)	GO:0008150 GO:0009736 GO:0010413 GO:0045492	biological process; "cytokinin mediated sig-ling pathway"; "glucuronoxylan metabolic process"; "xylan biosynthetic process"	-	-	GO:0005576 GO:0005739	extracellular region; "mitochondrion"	3.84305	2.509	2.07627	0.0555561	NA	NA	NA	NA	NA
Glyma.02G037500	Glyma02g04250	Lipase	G7K048_MEDTR	0	AT1G10740.4	0	alpha/beta-Hydrolases superfamily protein	GO:0006114	glycerol biosynthetic process	-	-	GO:0005576	extracellular region	7.70313	6.2366	6.22649	4.59834	1.67486	1.63411	1.8797	1.97628	1.05405
[truncated: 15,405 more rows]
